# Supplementary material
Source: PubMed Central journal article supplement (PMC5902804)

## Supporting Information

### Catalytic Diastereo- and Enantioselective Fluoroamination of Alkenes

Katrina M. Mennie, Steven M. Banik, Elaine C. Reichert and Eric N. Jacobsen\*

*Department of Chemistry & Chemical Biology, Harvard University, Cambridge, Massachusetts 02138*

\*Email: jacobsen@chemistry.harvard.edu

#### Contents

|                                                                                                      |      |
|------------------------------------------------------------------------------------------------------|------|
| 1. General Experimental Procedures.....                                                              | S1   |
| 2. Note of Caution.....                                                                              | S1   |
| 3. Materials.....                                                                                    | S1   |
| 4. Instrumentation.....                                                                              | S2   |
| 5. Optimization Experiments.....                                                                     | S3   |
| 6. Synthesis and Characterization of Substrates.....                                                 | S15  |
| 7. Synthesis and Characterization of Products.....                                                   | S26  |
| 8. Synthetic Elaboration Studies.....                                                                | S51  |
| 9. Competition between Aziridinium versus Phenonium Ion Formation.....                               | S60  |
| 10. X-Ray Crystallography Information.....                                                           | S63  |
| 11. Supporting Information References.....                                                           | S107 |
| 12. <sup>1</sup> H, <sup>13</sup> C, and <sup>19</sup> F NMR Spectra of Substrates and Products..... | S108 |

**General experimental procedures.** All reactions for the preparation of substrates were performed in standard, dry glassware fitted with rubber septa under an inert atmosphere of nitrogen unless otherwise described. All difluorination reactions were performed in low density polyethylene tubes sealed with a low density polyethylene cap under an atmosphere of air. Reported concentrations refer to solution volumes at room temperature. Concentration of organic solutions under reduced pressure was performed using house vacuum (ca. 40 mm Hg) at 30 °C. Column chromatography was performed with ZEOprep® 60 (40–63 micron) silica gel from American Scientific. Thin layer chromatography (TLC) was used for reaction monitoring and product detection was performed using pre-coated glass plates covered with 0.20 mm silica gel with fluorescent indicator; plates were visualized by exposure to UV light ( $\lambda_{\text{ex}} = 254 \text{ nm}$ ) or by staining with potassium permanganate or ninhydrin.

**CAUTION:** Pyridine•9HF is a corrosive and toxic substance that will etch glassware. Safe handling can be conducted with plastic syringes and metal needles, with NaHCO<sub>3</sub> (aq.) or NaOH (aq.) employed to quench excess HF. Though reactions should not be conducted in glassware when employing pyridine•9HF, glassware may be used to quench reactions provided sufficient quantities of base are present. Always handle pyridine•9HF while wearing gloves and in a fumehood. As a precautionary measure, have calcium gluconate gel nearby and apply immediately and liberally on skin exposed to HF.

**Materials.** Reagents were purchased in reagent grade from commercial suppliers and used as received, unless otherwise described. Anhydrous solvents (benzene, dichloromethane, diethyl ether, *N,N*-dimethylformamide, tetrahydrofuran, and toluene) were prepared by passing the solvent through an activated alumina column. Triethylamine and diisopropylethylamine were distilled over calcium hydride at atmospheric pressure.

**Instrumentation.** Proton nuclear magnetic resonance ( $^1\text{H}$  NMR) spectra were recorded on a Varian Mercury-400 or an Inova-500 spectrometer, are reported in parts per million downfield from tetramethylsilane, and are referenced to the residual protium resonances of the NMR solvent ( $\text{CDCl}_3$ : 7.26 [ $\text{CHCl}_3$ ]). Proton-decoupled carbon-13 nuclear magnetic resonance ( $^{13}\text{C}$   $\{^1\text{H}\}$  NMR) spectra were recorded on an Inova-500 spectrometer, are reported in parts per million downfield from tetramethylsilane, and are referenced to the carbon resonances of the NMR solvent ( $\text{CDCl}_3$ : 77.23). Chemical shifts for fluorine-19 nuclear magnetic resonance ( $^{19}\text{F}$  NMR) were recorded on an Inova-500 spectrometer and are reported in parts per million downfield from chlorotrifluoromethane, and are referenced to the fluorine resonance of chlorotrifluoromethane ( $\delta = 0$ ). Data are represented as follows: chemical shift, multiplicity (br = broad, s = singlet, d = doublet, t = triplet, q = quartet, quin = quintet, sext = sextet, sept = septet, m = multiplet), coupling constants in Hertz (Hz), integration. Infrared spectra were recorded using a Bruker Tensor 27 FT-IR spectrometer. Data are represented as follows: frequency of absorption ( $\text{cm}^{-1}$ ), intensity of absorption (s = strong, m = medium, w = weak, br = broad). High-resolution mass spectrometric data were obtained on an Agilent 6210 time-of-flight HPLC/MS spectrometer (ESI-TOF). Low-resolution mass spectrometric data were obtained on a Waters Quattro Micro GCMS ( $\text{EI}^+$ ). GC analysis was performed using an Agilent 7890A GC system using commercially available columns. Chiral HPLC analysis was performed using an Agilent 1200 series quaternary HPLC system using commercially available CHIRALCEL analytical columns (4.6 x 250 mm).

## Optimization Experiments.

### General procedure for *N*-protecting group optimization

Catalyst **1a** (8.0 mg, 5.20  $\mu\text{mol}$ , 10.0 mol%), *p*-trifluoromethyl-cinnamyl sulfonamide (52.0  $\mu\text{mol}$ , 1.00 equiv) and dichloromethane (0.30 mL) were combined in a polyethylene tube. The reaction mixture was cooled to  $-78$   $^{\circ}\text{C}$ . Pyridinium poly(hydrogen fluoride) (pyr•9HF, 70% hydrogen fluoride by weight, 100  $\mu\text{L}$ , 15 equiv hydrogen fluoride) was added via micropipette followed by *m*-chloroperbenzoic acid (*m*CPBA, 77% by weight, 12.8 mg, 57.2  $\mu\text{mol}$ , 1.10 equiv). The reaction was warmed to  $-30$   $^{\circ}\text{C}$  and stirred for 18 hours at that temperature. The reaction was cooled to  $-78$   $^{\circ}\text{C}$  and basic alumina (approximately 400 mg) was added slowly. The reaction was allowed to warm to room temperature with stirring and was filtered. The crude mixture was analyzed by  $^1\text{H}$  NMR using mesitylene as an internal standard to determine the yield of product and by chiral HPLC to determine the enantioselectivity.

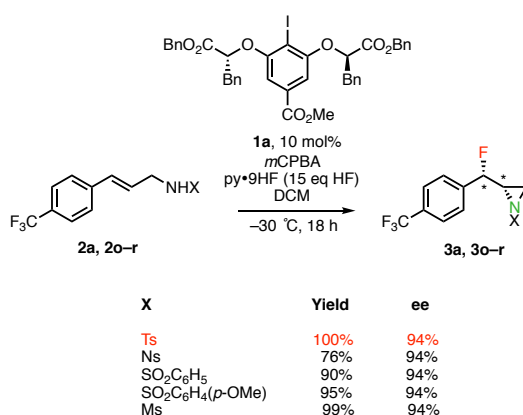

**Table S1.** *N*-Protecting group optimization

**X = Ts (3a)**

94% ee, Chiral HPLC (OJ-H, 50% isopropanol in hexanes, 1.0 mL/min,  $\lambda = 230$  nm);  $t_R(\text{minor}) = 8.4$  min,  $t_R(\text{major}) = 17.7$  min.

Racemic sample:

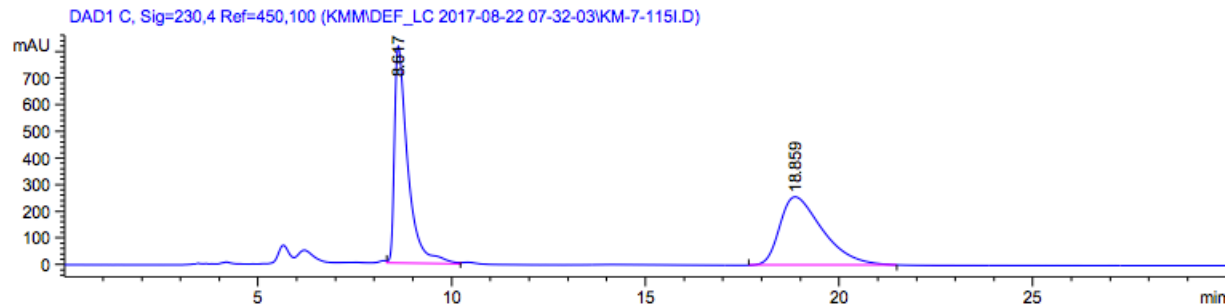

Signal 3: DAD1 C, Sig=230,4 Ref=450,100

| Peak # | RetTime [min] | Type | Width [min] | Area [mAU*s] | Height [mAU] | Area %  |
|--------|---------------|------|-------------|--------------|--------------|---------|
| 1      | 8.617         | VB   | 0.3503      | 1.95753e4    | 814.81110    | 49.8014 |
| 2      | 18.859        | BB   | 1.1274      | 1.97315e4    | 256.50644    | 50.1986 |

Totals : 3.93067e4 1071.31754

Enriched sample:

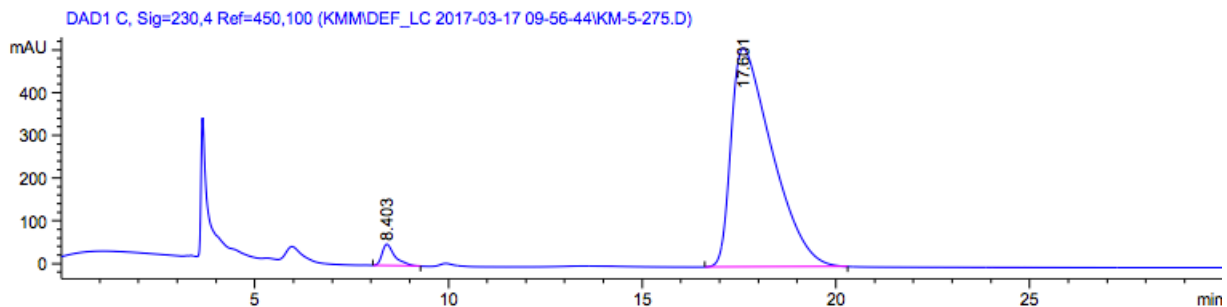

Signal 3: DAD1 C, Sig=230,4 Ref=450,100

| Peak # | RetTime [min] | Type | Width [min] | Area [mAU*s] | Height [mAU] | Area %  |
|--------|---------------|------|-------------|--------------|--------------|---------|
| 1      | 8.403         | BB   | 0.3418      | 1155.48096   | 49.95803     | 2.9786  |
| 2      | 17.601        | BB   | 1.0699      | 3.76372e4    | 511.83502    | 97.0214 |

Totals : 3.87927e4 561.79305

**X = Ns (3o)**

94% ee, Chiral HPLC (OJ-H, 50% isopropanol in hexanes, 1.0 mL/min,  $\lambda = 230$  nm);  $t_R(\text{major}) = 7.1$  min,  $t_R(\text{minor}) = 18.3$  min.

Racemic sample:

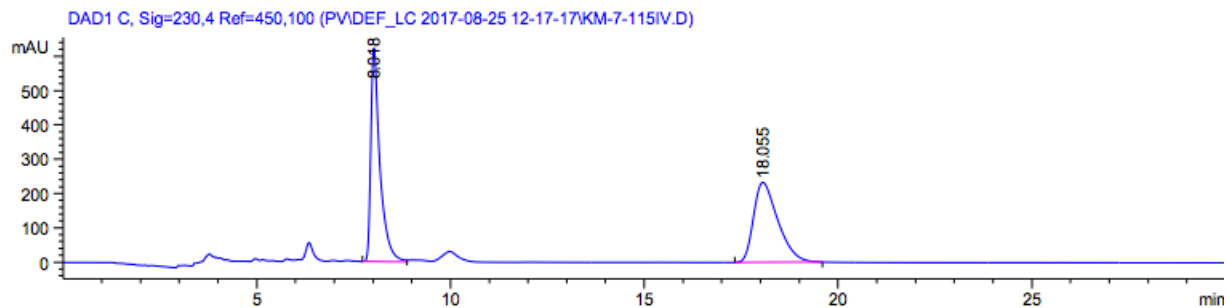

Signal 3: DAD1 C, Sig=230,4 Ref=450,100

| Peak # | RetTime [min] | Type | Width [min] | Area [mAU*s] | Height [mAU] | Area %  |
|--------|---------------|------|-------------|--------------|--------------|---------|
| 1      | 8.018         | VV   | 0.2370      | 1.01980e4    | 622.86884    | 50.0240 |
| 2      | 18.055        | BB   | 0.6560      | 1.01882e4    | 233.07854    | 49.9760 |

Totals : 2.03862e4 855.94737

Enriched sample:

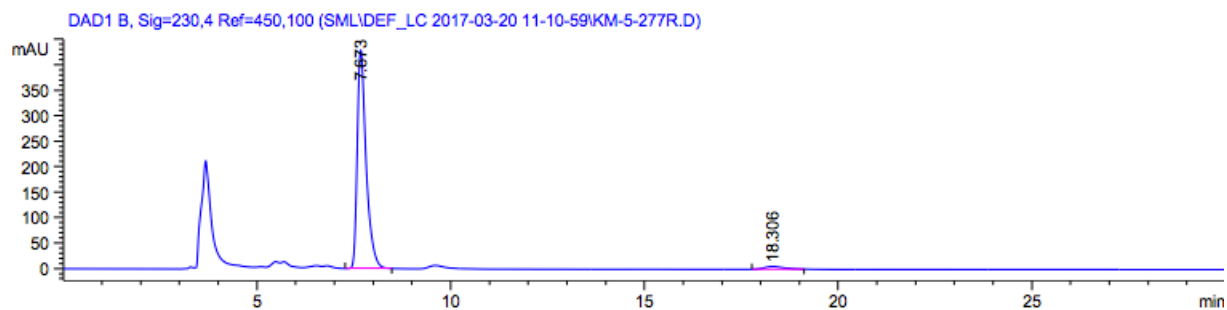

Signal 2: DAD1 B, Sig=230,4 Ref=450,100

| Peak # | RetTime [min] | Type | Width [min] | Area [mAU*s] | Height [mAU] | Area %  |
|--------|---------------|------|-------------|--------------|--------------|---------|
| 1      | 7.673         | VB   | 0.2378      | 6832.35889   | 429.04306    | 97.2353 |
| 2      | 18.306        | BB   | 0.5252      | 194.26431    | 5.38117      | 2.7647  |

Totals : 7026.62320 434.42423

**X = SO<sub>2</sub>C<sub>6</sub>H<sub>5</sub> (3p)**

94% ee, Chiral HPLC (OJ-H, 50% isopropanol in hexanes, 1.0 mL/min, λ = 210 nm); t<sub>R</sub>(minor) = 8.9 min, t<sub>R</sub>(major) = 19.1 min.

Racemic sample:

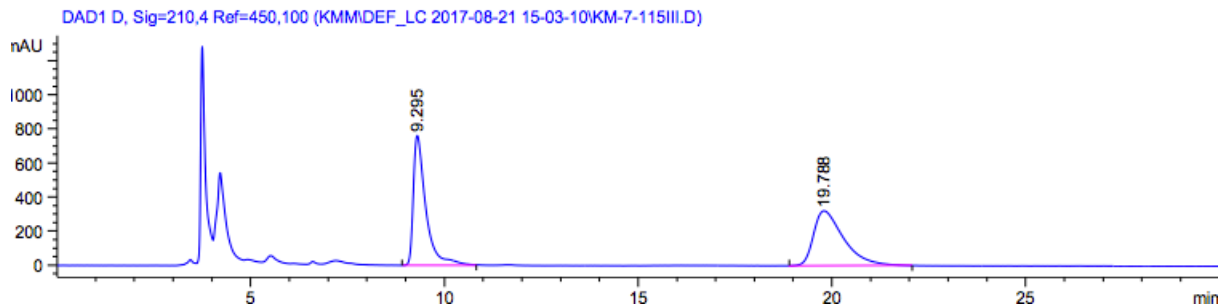

Signal 4: DAD1 D, Sig=210,4 Ref=450,100

| Peak # | RetTime [min] | Type | Width [min] | Area [mAU*s] | Height [mAU] | Area %  |
|--------|---------------|------|-------------|--------------|--------------|---------|
| 1      | 9.295         | BV   | 0.3346      | 1.73198e4    | 763.76923    | 49.8517 |
| 2      | 19.788        | BB   | 0.7452      | 1.74228e4    | 322.03442    | 50.1483 |

Totals : 3.47426e4 1085.80365

Enriched sample:

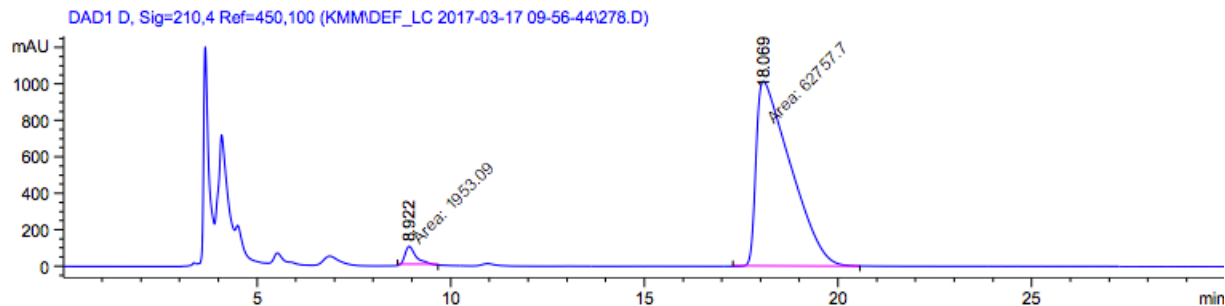

Signal 4: DAD1 D, Sig=210,4 Ref=450,100

| Peak # | RetTime [min] | Type | Width [min] | Area [mAU*s] | Height [mAU] | Area %  |
|--------|---------------|------|-------------|--------------|--------------|---------|
| 1      | 8.922         | MM   | 0.3280      | 1953.08704   | 99.22910     | 3.0182  |
| 2      | 18.069        | MM   | 1.0308      | 6.27577e4    | 1014.73376   | 96.9818 |

Totals : 6.47108e4 1113.96287

**X = SO<sub>2</sub>C<sub>6</sub>H<sub>4</sub>(p-OMe) (3q)**

94% ee, Chiral HPLC (OJ-H, 50% isopropanol in hexanes, 1.0 mL/min, λ = 210 nm); t<sub>R</sub>(minor) = 14.2 min, t<sub>R</sub>(major) = 25.6 min.

Racemic sample:

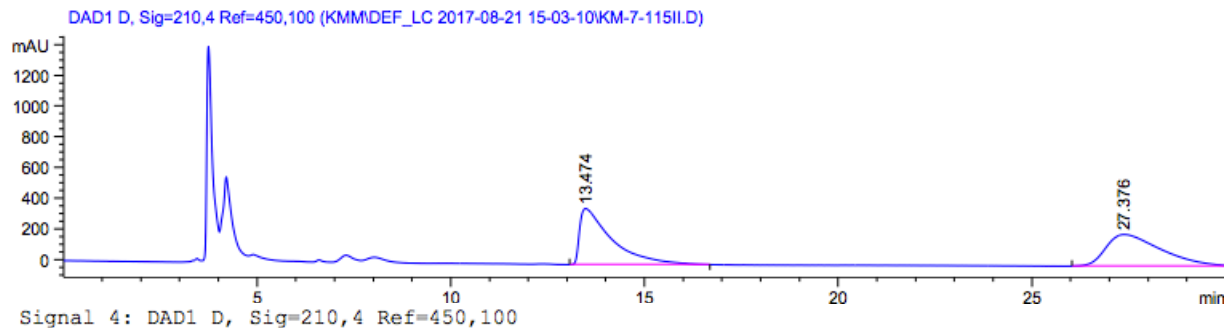

| Peak # | RetTime [min] | Type | Width [min] | Area [mAU*s] | Height [mAU] | Area %  |
|--------|---------------|------|-------------|--------------|--------------|---------|
| 1      | 13.474        | BB   | 0.7661      | 2.11041e4    | 364.19147    | 51.1759 |
| 2      | 27.376        | VBA  | 1.1700      | 2.01342e4    | 204.97517    | 48.8241 |

Totals : 4.12383e4 569.16664

Enriched sample:

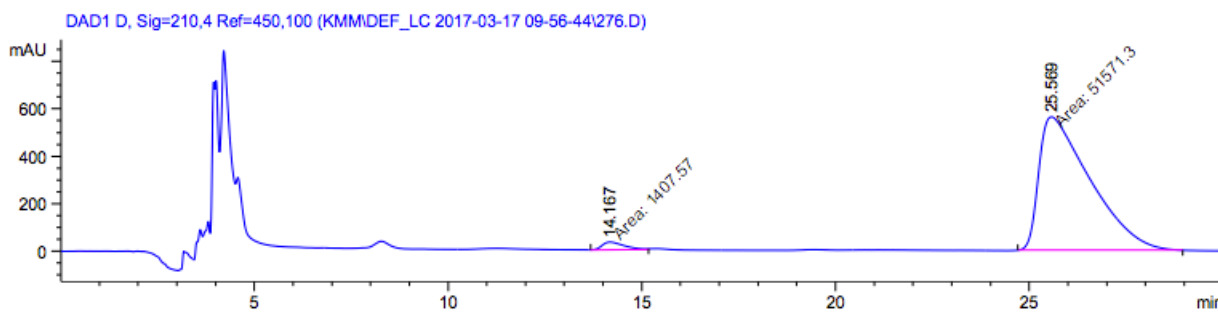

Signal 4: DAD1 D, Sig=210,4 Ref=450,100

| Peak # | RetTime [min] | Type | Width [min] | Area [mAU*s] | Height [mAU] | Area %  |
|--------|---------------|------|-------------|--------------|--------------|---------|
| 1      | 14.167        | MM   | 0.6997      | 1407.57104   | 33.52897     | 2.6569  |
| 2      | 25.569        | MM   | 1.5284      | 5.15713e4    | 562.36053    | 97.3431 |

Totals : 5.29789e4 595.88951

**X = Ms (3r)**

94% ee, Chiral HPLC (OJ-H, 50% isopropanol in hexanes, 1.0 mL/min,  $\lambda = 210$  nm);  $t_R$ (minor) = 11.4 min,  $t_R$ (major) = 17.1 min.

Racemic sample:

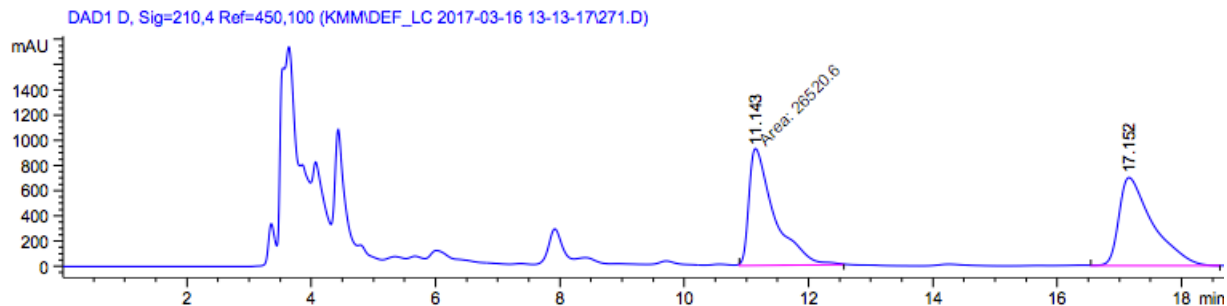

Signal 4: DAD1 D, Sig=210,4 Ref=450,100

| Peak # | RetTime [min] | Type | Width [min] | Area [mAU*s] | Height [mAU] | Area %  |
|--------|---------------|------|-------------|--------------|--------------|---------|
| 1      | 11.143        | MM   | 0.4756      | 2.65206e4    | 929.37671    | 50.0303 |
| 2      | 17.152        | VV   | 0.5513      | 2.64885e4    | 700.32471    | 49.9697 |

Totals : 5.30091e4 1629.70142

Enriched sample:

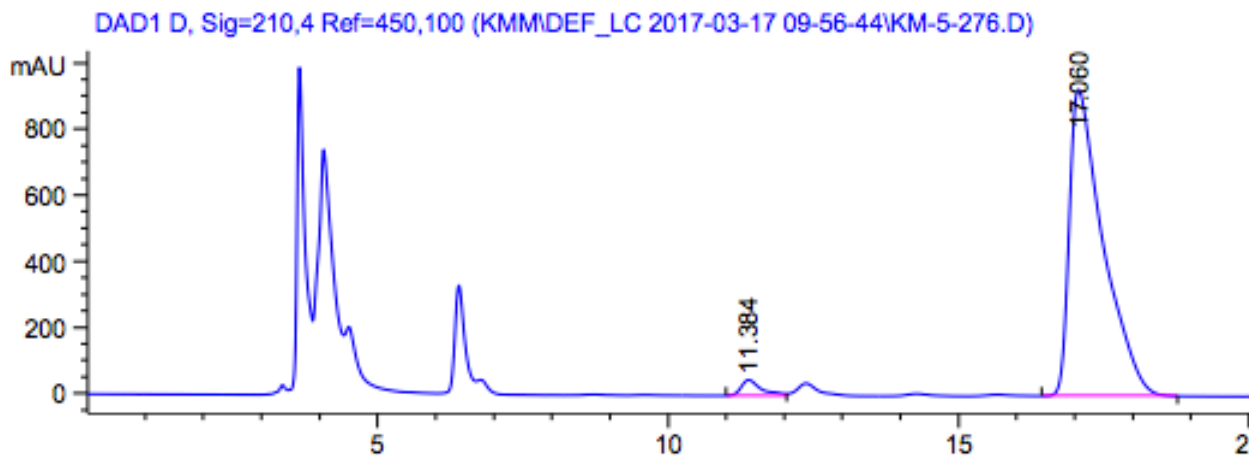

Signal 4: DAD1 D, Sig=210,4 Ref=450,100

| Peak # | RetTime [min] | Type | Width [min] | Area [mAU*s] | Height [mAU] | Area %  |
|--------|---------------|------|-------------|--------------|--------------|---------|
| 1      | 11.384        | BV   | 0.3592      | 1177.55298   | 47.84172     | 3.0421  |
| 2      | 17.060        | VB   | 0.5720      | 3.75315e4    | 927.64667    | 96.9579 |

Totals : 3.87090e4 975.48839



### General procedure for catalyst optimization

Catalyst (**1a–i**, 5.2  $\mu\text{mol}$ , 10.0 mol%), *p*-trifluoromethyl-cinnamyl tosylamide (**2a**, 17.8 mg, 52.0  $\mu\text{mol}$ , 1.00 equiv) and dichloromethane (0.30 mL) were combined in a polyethylene tube. The reaction mixture was cooled to  $-78\text{ }^{\circ}\text{C}$ . Pyridinium poly(hydrogen fluoride) ( $\text{py}\cdot 9\text{HF}$ , 70% hydrogen fluoride by weight, 210  $\mu\text{L}$ , 15 equiv hydrogen fluoride) was added via micropipette followed by *m*-chloroperbenzoic acid (*m*CPBA, 77% by weight, 12.8 mg, 57.2  $\mu\text{mol}$ , 1.10 equiv). The reaction was warmed to  $-30\text{ }^{\circ}\text{C}$  and stirred for 18 hours at that temperature. The reaction was cooled to  $-78\text{ }^{\circ}\text{C}$  and basic alumina (approximately 750 mg) was added slowly. The reaction was allowed to warm to room temperature with stirring and was filtered. The crude mixture was analyzed by  $^1\text{H}$  NMR using mesitylene as an internal standard to determine the yield of product and by chiral HPLC GC to determine the enantioselectivity.

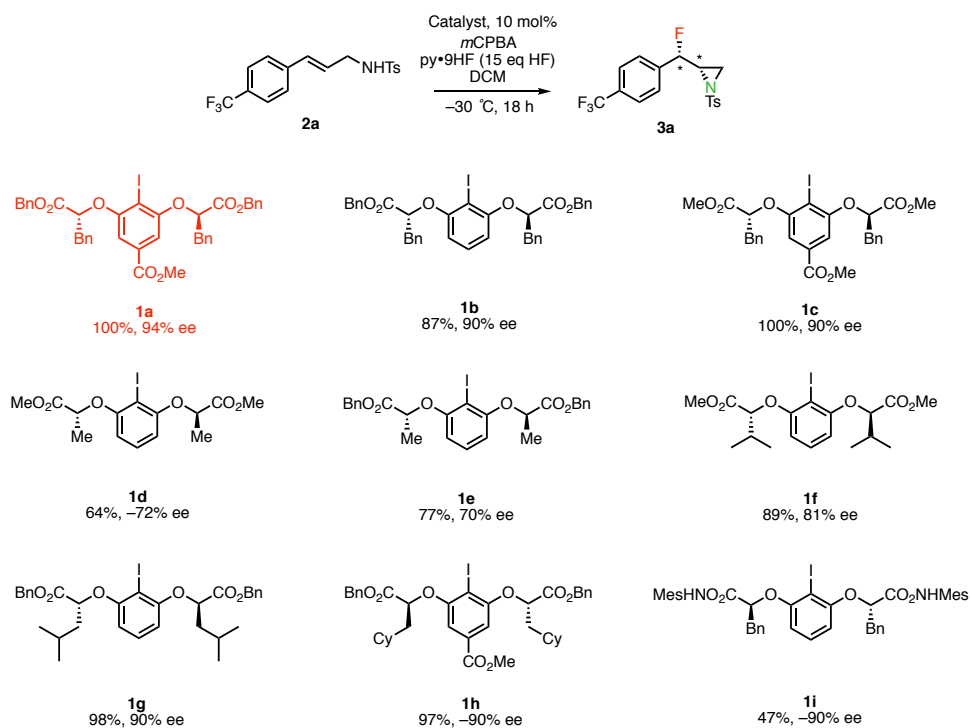

Table S2. Catalyst optimization

Racemic sample:

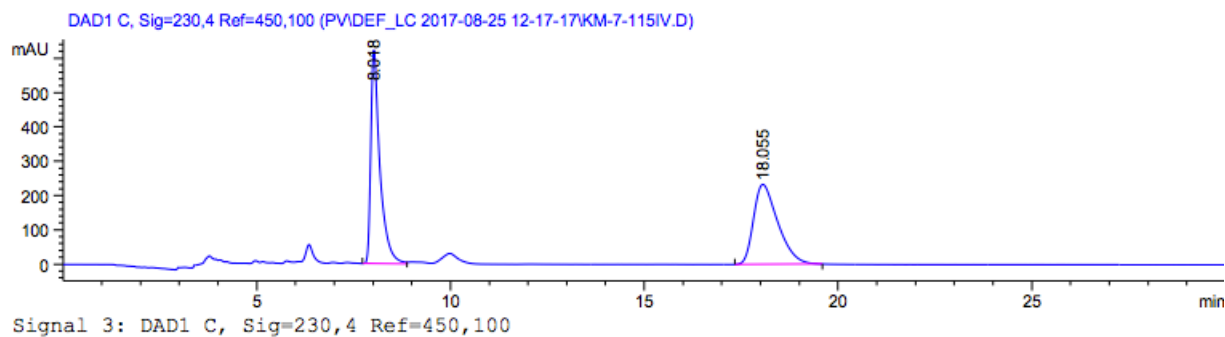

| Peak # | RetTime [min] | Type | Width [min] | Area [mAU*s] | Height [mAU] | Area %  |
|--------|---------------|------|-------------|--------------|--------------|---------|
| 1      | 8.018         | VV   | 0.2370      | 1.01980e4    | 622.86884    | 50.0240 |
| 2      | 18.055        | BB   | 0.6560      | 1.01882e4    | 233.07854    | 49.9760 |

Totals : 2.03862e4 855.94737

Catalyst **1b**

90% ee, Chiral HPLC (OJ-H, 50% isopropanol in hexanes, 1.0 mL/min,  $\lambda = 230$  nm);  $t_R(\text{minor}) = 8.8$  min,  $t_R(\text{major}) = 18.4$  min.

Enriched sample:

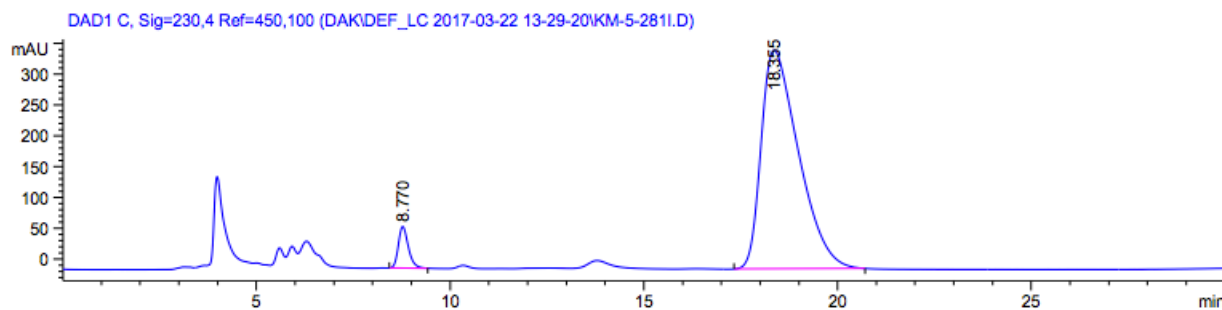

Signal 3: DAD1 C, Sig=230,4 Ref=450,100

| Peak # | RetTime [min] | Type | Width [min] | Area [mAU*s] | Height [mAU] | Area %  |
|--------|---------------|------|-------------|--------------|--------------|---------|
| 1      | 8.770         | BB   | 0.2757      | 1213.22131   | 67.48472     | 4.8392  |
| 2      | 18.355        | BB   | 1.0173      | 2.38577e4    | 355.32098    | 95.1608 |

Totals : 2.50710e4 422.80570

### Catalyst **1c**

90% ee, Chiral HPLC (OJ-H, 50% isopropanol in hexanes, 1.0 mL/min,  $\lambda = 230$  nm);  $t_R(\text{minor}) = 8.6$  min,  $t_R(\text{major}) = 17.8$  min.

Enriched sample:

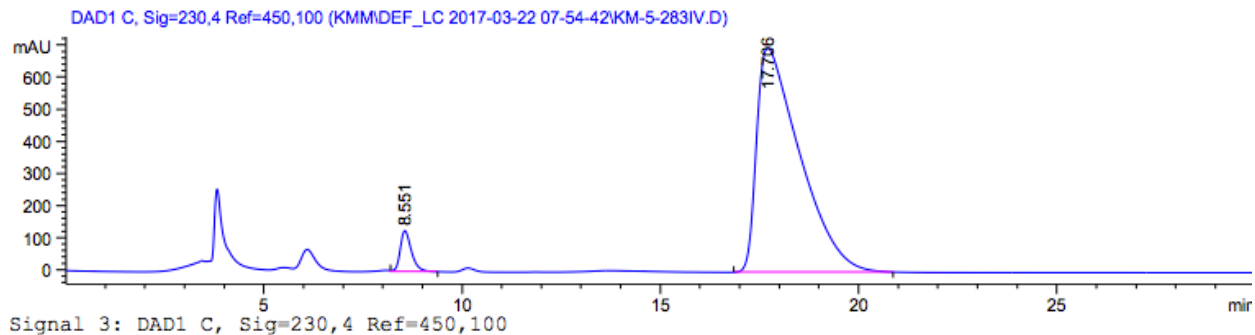

| Peak # | RetTime [min] | Type | Width [min] | Area [mAU*s] | Height [mAU] | Area %  |
|--------|---------------|------|-------------|--------------|--------------|---------|
| 1      | 8.551         | VB   | 0.3020      | 2536.97534   | 127.57331    | 4.5663  |
| 2      | 17.706        | BB   | 1.0779      | 5.30214e4    | 698.23096    | 95.4337 |

Totals : 5.55584e4 825.80427

### Catalyst **1d**

-72% ee, Chiral HPLC (OJ-H, 50% isopropanol in hexanes, 1.0 mL/min,  $\lambda = 230$  nm);  $t_R(\text{major}) = 8.5$  min,  $t_R(\text{minor}) = 18.8$  min.

Enriched sample:

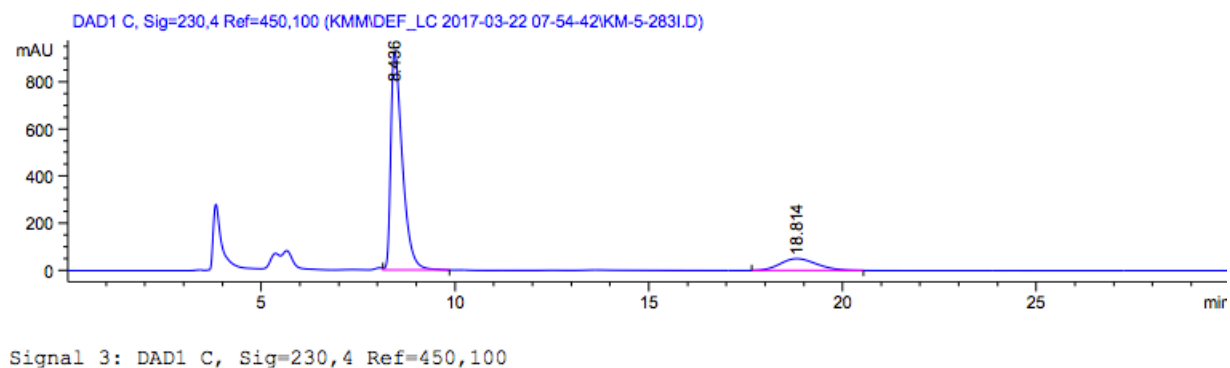

| Peak # | RetTime [min] | Type | Width [min] | Area [mAU*s] | Height [mAU] | Area %  |
|--------|---------------|------|-------------|--------------|--------------|---------|
| 1      | 8.436         | VB   | 0.3109      | 1.91469e4    | 927.42902    | 85.2549 |
| 2      | 18.814        | BB   | 0.9450      | 3311.52393   | 50.23888     | 14.7451 |

Totals : 2.24585e4 977.66790

### Catalyst **1e**

70% ee, Chiral HPLC (OJ-H, 50% isopropanol in hexanes, 1.0 mL/min,  $\lambda = 230$  nm);  $t_R(\text{minor}) = 8.5$  min,  $t_R(\text{major}) = 18.3$  min.

Enriched sample:

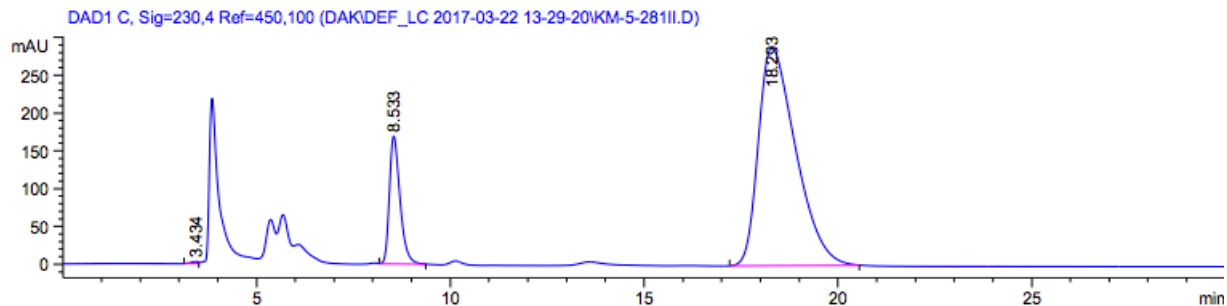

| Peak # | RetTime [min] | Type | Width [min] | Area [mAU*s] | Height [mAU] | Area %  |
|--------|---------------|------|-------------|--------------|--------------|---------|
| 1      | 3.434         | BV   | 0.1567      | 37.35361     | 3.14161      | 0.1649  |
| 2      | 8.533         | VB   | 0.2937      | 3248.10229   | 169.38814    | 14.3349 |
| 3      | 18.293        | BB   | 1.0055      | 1.93732e4    | 289.22510    | 85.5002 |

Totals : 2.26587e4 461.75485

### Catalyst **1f**

81% ee, Chiral HPLC (OJ-H, 50% isopropanol in hexanes, 1.0 mL/min,  $\lambda = 230$  nm);  $t_R(\text{minor}) = 8.6$  min,  $t_R(\text{major}) = 18.5$  min.

Enriched sample:

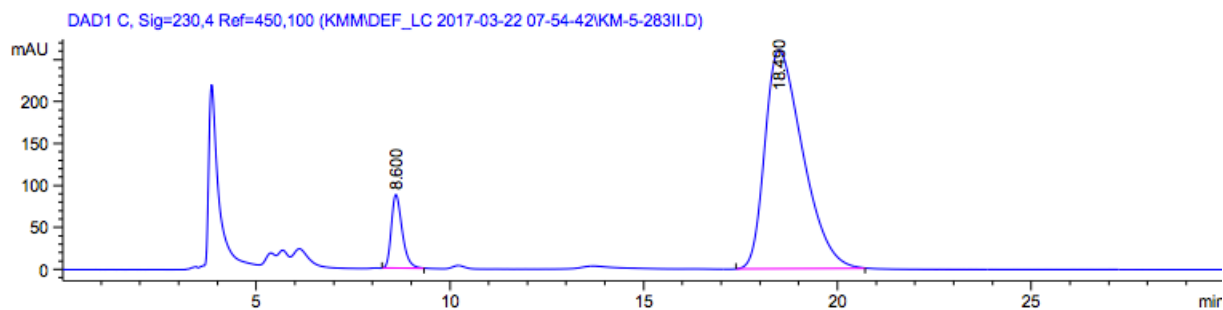

Signal 3: DAD1 C, Sig=230,4 Ref=450,100

| Peak # | RetTime [min] | Type | Width [min] | Area [mAU*s] | Height [mAU] | Area %  |
|--------|---------------|------|-------------|--------------|--------------|---------|
| 1      | 8.600         | BB   | 0.2998      | 1710.93127   | 87.63212     | 8.8052  |
| 2      | 18.490        | BB   | 1.0313      | 1.77199e4    | 260.59326    | 91.1948 |

Totals : 1.94309e4 348.22538

### Catalyst **1g**

90% ee, Chiral HPLC (OJ-H, 50% isopropanol in hexanes, 1.0 mL/min,  $\lambda = 230$  nm);  $t_R(\text{minor}) = 8.6$  min,  $t_R(\text{major}) = 17.8$  min.

Enriched sample:

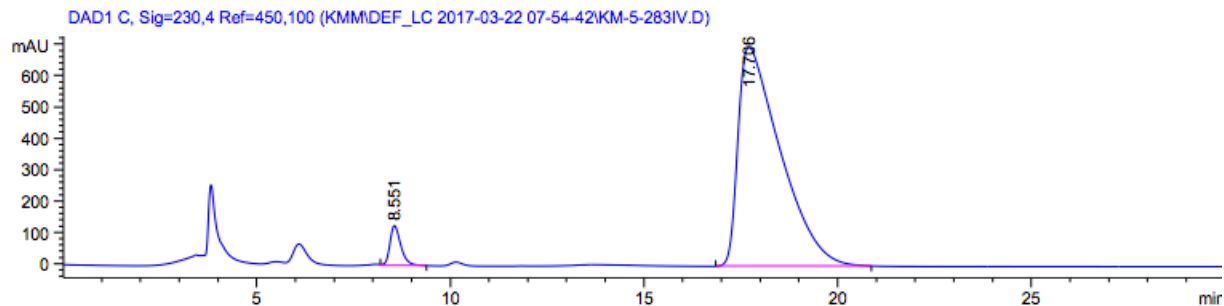

Signal 3: DAD1 C, Sig=230,4 Ref=450,100

| Peak # | RetTime [min] | Type | Width [min] | Area [mAU*s] | Height [mAU] | Area %  |
|--------|---------------|------|-------------|--------------|--------------|---------|
| 1      | 8.551         | VB   | 0.3020      | 2536.97534   | 127.57331    | 4.5663  |
| 2      | 17.706        | BB   | 1.0779      | 5.30214e4    | 698.23096    | 95.4337 |

Totals :                      5.55584e4    825.80427

### Catalyst **1h**

-90% ee, Chiral HPLC (OJ-H, 50% isopropanol in hexanes, 1.0 mL/min,  $\lambda = 230$  nm);  $t_R(\text{major}) = 8.3$  min,  $t_R(\text{minor}) = 18.8$  min.

Enriched sample:

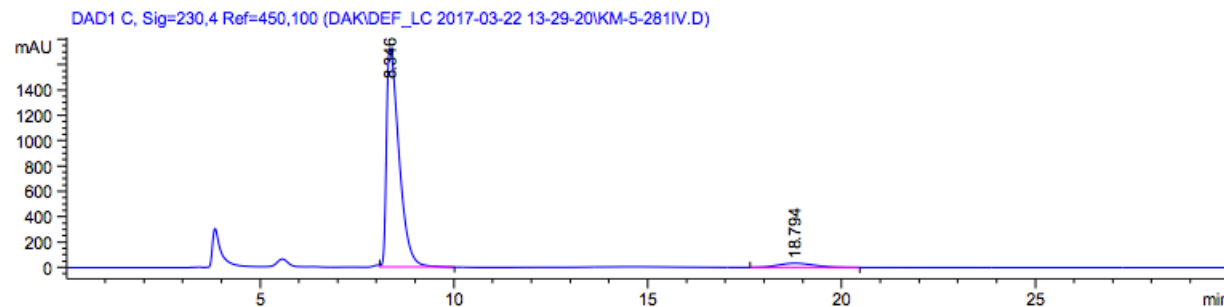

Signal 3: DAD1 C, Sig=230,4 Ref=450,100

| Peak # | RetTime [min] | Type | Width [min] | Area [mAU*s] | Height [mAU] | Area %  |
|--------|---------------|------|-------------|--------------|--------------|---------|
| 1      | 8.346         | VB   | 0.3451      | 3.89807e4    | 1728.34973   | 94.7775 |
| 2      | 18.794        | BB   | 0.9057      | 2147.95630   | 33.33636     | 5.2225  |

Totals :                      4.11286e4    1761.68610

Catalyst **1i**

-90% ee, Chiral HPLC (OJ-H, 50% isopropanol in hexanes, 1.0 mL/min,  $\lambda = 230$  nm);  $t_R(\text{major}) = 8.3$  min,  $t_R(\text{minor}) = 18.8$  min.

Enriched sample:

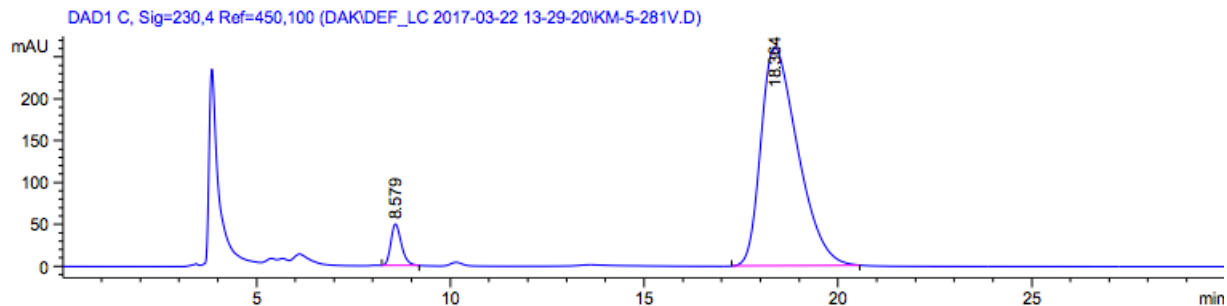

Signal 3: DAD1 C, Sig=230,4 Ref=450,100

| Peak # | RetTime [min] | Type | Width [min] | Area [mAU*s] | Height [mAU] | Area %  |
|--------|---------------|------|-------------|--------------|--------------|---------|
| 1      | 8.579         | BB   | 0.2904      | 941.48804    | 49.37883     | 5.1649  |
| 2      | 18.364        | BB   | 0.9916      | 1.72872e4    | 261.39069    | 94.8351 |

Totals : 1.82287e4 310.76952

## Synthesis of Substrates.

### General Procedure A:

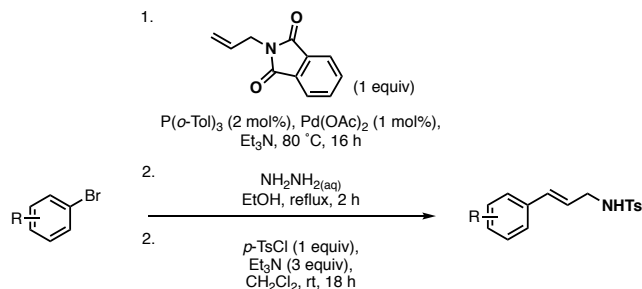

To a suspension of aryl bromide (5.50 mmol, 1 equiv), 2-allylisindoline-1,3-dione (1.03 g, 5.50 mmol, 1.0 equiv) and tri(*o*-tolyl)phosphine (33.5 mg, 0.11 mmol, 2 mol%) in anhydrous triethylamine (4.0 mL) was added palladium(II) acetate (12.7 mg, 0.057 mmol, 1 mol%). The reaction mixture was stirred at 80 °C for 16 hours. After cooling to room temperature, the reaction mixture was diluted with dichloromethane (100 mL), washed with water (20 mL), dried over NaSO<sub>4</sub>, filtered and concentrated under reduced pressure. The crude residue was added to a solution of ethanol (40 mL) and hydrazine hydrate (~80% in water, 2 mL) and heated under reflux for 2 hours. After cooling, the suspension was filtered, washing with cold ethanol. The filtrate was concentrated under reduced pressure, re-dissolved in ethyl acetate (50 mL), washed with 1 M NaOH<sub>(aq)</sub> (2 x 20 mL) and brine (10 mL), dried over NaSO<sub>4</sub>, filtered and concentrated under reduced pressure. The crude residue was dissolved in dichloromethane (22 mL). Triethylamine (2.3 mL, 16.5 mmol, 3 equiv) followed by *p*-toluenesulfonyl chloride (1.05 g, 5.50 mmol, 1 equiv). The resulting solution was stirred at room temperature. After 18 hours, the reaction mixture was washed with brine (10 mL), dried over NaSO<sub>4</sub>, filtered and concentrated under reduced pressure.

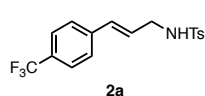

Prepared according to general procedure A using 1-bromo-4-(trifluoromethyl)benzene (0.77 mL, 5.50 mmol). The crude residue was purified by silica gel column chromatography (10 to 100% ethyl acetate in hexanes) to give **2a** (1.45 g, 74% overall yield) as a yellow solid. <sup>1</sup>H NMR (500 MHz, CDCl<sub>3</sub>): δ 7.80 (d, *J* = 8.3 Hz, 2H), 7.52 (d, *J* = 8.3 Hz, 2H), 7.41–7.27 (m, 4H), 6.48 (dd, *J* = 15.9, 1.6 Hz, 1H), 6.12 (dt, *J* = 15.9, 6.1 Hz, 1H), 5.20 (t, *J* = 6.3 Hz, 1H), 3.78 (td, *J* = 6.2, 1.6 Hz, 2H), 2.39 (s, 3H); <sup>13</sup>C NMR (125.7 MHz, CDCl<sub>3</sub>): δ 143.8, 139.8, 137.1, 131.4, 129.9, 129.7 (q, *J* = 32.3 Hz), 127.3, 127.2, 126.7, 125.6 (q, *J* = 3.8 Hz), 124.2 (q, *J* = 271.8 Hz), 83.39–74.57 (m), 45.3, 21.5; <sup>19</sup>F NMR (470.4 MHz, CDCl<sub>3</sub>): δ -62.6 (s); FTIR (thin film) ν 3259 (w), 1715 (w), 1370 (s), 1159 (s), 906 (s), 728 (s), 552 (s) cm<sup>-1</sup>; HRMS (ESI-TOF) Calc'd for C<sub>17</sub>H<sub>16</sub>F<sub>3</sub>NO<sub>2</sub>S [M+H]<sup>+</sup>: 356.0927; found 356.0920.

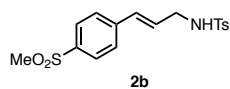

Prepared according to general procedure A using 4-bromophenyl methyl sulfone (1.29 g, 5.50 mmol). The crude residue was purified by silica gel column chromatography (10 to 100% ethyl acetate in hexanes) to give **2b** (1.38 g, 68% overall yield) as a yellow solid. <sup>1</sup>H NMR (500 MHz, CDCl<sub>3</sub>): δ 7.88–7.69 (m, 4H), 7.33 (d, *J* = 8.3 Hz, 2H), 7.27 (d, *J* = 8.4 Hz, 2H), 6.47 (dd, *J* = 15.9, 1.9 Hz, 1H), 6.17 (ddd, *J* = 16.0, 6.8, 5.1 Hz, 1H), 5.28 (t, *J* = 6.3 Hz, 1H), 3.75 (td, *J* = 6.2, 1.6 Hz, 2H), 3.03 (s, 3H), 2.38 (s, 3H); <sup>13</sup>C NMR (125.7 MHz, CDCl<sub>3</sub>): δ 143.7, 141.8, 139.2, 137.1, 130.7, 129.9, 129.0, 127.7, 127.3, 127.1, 45.1, 44.6, 21.6; FTIR (thin film) ν 3270 (br. s), 1596 (m), 1294 (s), 1146 (s), 959 (m), 550 (s) cm<sup>-1</sup>; HRMS (ESI-TOF) Calc'd for C<sub>17</sub>H<sub>19</sub>NO<sub>4</sub>S<sub>2</sub> [M+H]<sup>+</sup>: 366.0828; found 366.0826.

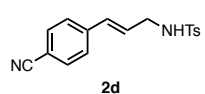

Prepared according to general procedure A using 4-bromobenzonitrile (1.00 g, 5.50 mmol). The crude residue was purified by silica gel column chromatography (10

to 100% ethyl acetate in hexanes) to give **2d** (1.43 g, 81% overall yield) as a yellow solid. <sup>1</sup>H NMR (500 MHz, CDCl<sub>3</sub>): δ 7.74 (d, *J* = 8.3 Hz, 1H), 7.46 (d, *J* = 8.3 Hz, 1H), 7.22 (dd, *J* = 8.1, 4.9 Hz, 3H), 6.41 (d, *J* = 15.9 Hz, 1H), 6.11 (dt, *J* = 15.9, 6.0 Hz, 1H), 5.54 (t, *J* = 6.3 Hz, 1H), 3.84–3.59 (m, 1H), 2.32 (s, 2H); <sup>13</sup>C NMR (125.7 MHz, CDCl<sub>3</sub>): δ 143.5, 140.8, 136.9, 132.2, 130.6, 129.7, 128.6, 127.1, 126.8, 118.8, 110.6, 44.9, 21.4; FTIR (thin film) ν 3272 (br. s), 2225 (m), 1604 (m), 1322 (s), 1153 (s), 661 (s), 549 (s) cm<sup>-1</sup>; HRMS (ESI-TOF) Calc'd for C<sub>17</sub>H<sub>16</sub>N<sub>2</sub>O<sub>2</sub>S [M+H]<sup>+</sup>: 313.1005; found 313.1004.

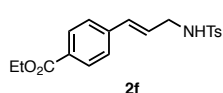

Prepared according to general procedure A using ethyl 4-bromobenzoate (0.9 mL, 5.50 mmol). The crude residue was purified by silica gel column chromatography (10 to 100% ethyl acetate in hexanes) to give **2f** (1.52 g, 77% overall yield) as a white solid. <sup>1</sup>H NMR (500 MHz, CDCl<sub>3</sub>): δ 7.95 (d, *J* = 8.4 Hz, 2H), 7.87–7.70 (m, 2H), 7.46–7.18 (m, 4H), 6.65–6.35 (m, 1H), 6.13 (ddd, *J* = 16.0, 6.8, 5.5 Hz, 1H), 4.90 (t, *J* = 6.3 Hz, 1H), 4.56–4.16 (m, 2H), 4.01–3.59 (m, 2H), 2.42 (s, 3H), 1.39 (t, *J* = 7.1 Hz, 2H); <sup>13</sup>C NMR (125.7 MHz, CDCl<sub>3</sub>): δ 166.4, 143.7, 140.6, 137.2, 132.0, 130.0, 129.9, 129.8, 127.3, 127.1, 126.4, 61.1, 45.4, 21.6, 14.5; FTIR (thin film) ν 3241 (m), 1697 (s), 1293 (s), 1154 (s), 981 (m), 581 (s) cm<sup>-1</sup>; HRMS (ESI-TOF) Calc'd for C<sub>19</sub>H<sub>21</sub>NO<sub>4</sub>S [M+H]<sup>+</sup>: 360.1264; found 360.1261.

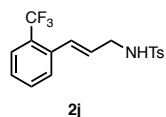

Prepared according to general procedure A using 1-bromo-2-(trifluoromethyl)benzene (0.75 mL, 5.50 mmol). The crude residue was purified by silica gel column chromatography (10 to 100% ethyl acetate in hexanes) to give **2j** (1.59 g, 81% overall yield) as a colorless, viscous oil. <sup>1</sup>H NMR (500 MHz, CDCl<sub>3</sub>): δ .81 (d, *J* = 8.1 Hz, 2H), 7.64–7.55 (m, 1H), 7.49–7.40 (m, 2H), 7.37–7.25 (m, 3H), 6.81 (dd, *J* = 15.7, 2.1 Hz, 1H), 6.04 (dt, *J* = 15.6, 6.3 Hz, 1H), 5.17 (t, *J* = 6.3 Hz, 1H), 3.78 (td, *J* = 6.3, 1.4 Hz, 2H), 2.39 (s, 3H); <sup>13</sup>C NMR (125.7 MHz, CDCl<sub>3</sub>): δ 143.7, 137.0, 135.3, 131.9, 129.9, 129.0, 128.8, 128.8, 127.6, 127.6, 127.3, 125.7 (q, *J* = 5.7 Hz), 124.3 (q, *J* = 274.0 Hz), 45.5, 21.5; <sup>19</sup>F NMR (470.4 MHz, CDCl<sub>3</sub>): δ -59.5 (s); FTIR (thin film) ν 3274 (br. m), 1598 (w), 1312 (s), 1153 (s), 965 (m), 658 (s) cm<sup>-1</sup>; HRMS (ESI-TOF) Calc'd for C<sub>17</sub>H<sub>16</sub>F<sub>3</sub>NO<sub>2</sub>S [M+H]<sup>+</sup>: 356.0927; found 356.0919.

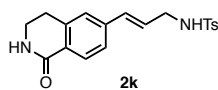

Prepared according to general procedure A using 6-bromo-3,4-dihydroisoquinolin-1(2H)-one (1.24 g, 5.50 mmol). The crude residue was purified by recrystallization from methanol to give **2k** (1.18 g, 60% overall yield) as a white solid. <sup>1</sup>H NMR (500 MHz, DMSO-*d*<sub>6</sub>): δ 7.93–7.82 (m, 2H), 7.76 (d, *J* = 8.0 Hz, 1H), 7.71 (d, *J* = 8.3 Hz, 2H), 7.38 (d, *J* = 8.2 Hz, 2H), 7.27–7.22 (m, 1H), 7.19 (s, 1H), 6.65–6.36 (m, 1H), 6.16 (dt, *J* = 15.9, 5.9 Hz, 1H), 3.59 (s, 2H), 3.35 (dt, *J* = 6.7, 3.2 Hz, 2H), 2.85 (t, *J* = 6.5 Hz, 2H), 2.35 (s, 3H); <sup>13</sup>C NMR (125.7 MHz, DMSO-*d*<sub>6</sub>): δ 64.3, 142.6, 139.6, 139.4, 137.9, 130.3, 129.6, 128.4, 127.8, 127.4, 126.6, 125.0, 124.4, 45.5, 44.5, 27.7, 20.9; FTIR (thin film) ν 1653 (s), 1156 (s), 845 (m), 550 (m) cm<sup>-1</sup>; HRMS (ESI-TOF) Calc'd for C<sub>19</sub>H<sub>20</sub>N<sub>2</sub>O<sub>3</sub>S [M+H]<sup>+</sup>: 357.1267; found 357.1273.

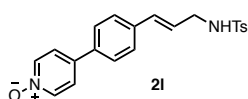

Prepared according to general procedure A using 4-(4-bromophenyl)pyridine (1.29 g, 5.50 mmol). The crude residue was dissolved in dichloromethane (22 mL). *m*CPBA (77% by weight, 1.35 g, 5.50 mmol, 1.0 equiv) was added and the reaction mixture was stirred at room temperature. After 16 hours, the reaction mixture was washed with sat. NaHCO<sub>3(aq)</sub> (3 x 10 mL) and brine (10 mL), dried over NaSO<sub>4</sub>, filtered, concentrate under reduced pressure and purified by silica gel column chromatography (0 to 10% methanol in dichloromethane) to give **2l** (1.15 g, 55%) as white solid. <sup>1</sup>H NMR (500 MHz, CD<sub>3</sub>OD): δ 8.35 (d, *J* = 7.3 Hz, 2H), 7.86 (d, *J* = 7.3 Hz, 2H), 7.76 (d, *J* = 8.3 Hz, 2H), 7.71 (d, *J* = 8.4 Hz, 2H), 7.43 (d, *J* = 8.4 Hz, 2H), 7.39–7.34 (m, 2H), 6.50 (d, *J* = 16.0 Hz, 1H), 6.16 (dt, *J* = 15.8, 6.1 Hz, 1H), 3.70 (dd, *J* = 6.1, 1.6 Hz, 2H), 2.39 (s, 3H); <sup>13</sup>C NMR (125.7 MHz, 5% CD<sub>3</sub>CO<sub>2</sub>D/CDCl<sub>3</sub>): δ 143.5, 141.9, 139.7, 137.9, 137.2, 134.5, 131.4, 129.8, 127.4, 127.2, 126.8, 126.7, 123.5, 45.2, 21.6; FTIR (thin film) ν 3051 (br. s), 1711 (br. s), 1479 (m), 1155 (s), 844 (m), 569 (m) cm<sup>-1</sup>; HRMS (ESI-TOF) Calc'd for C<sub>21</sub>H<sub>20</sub>N<sub>2</sub>O<sub>3</sub>S [M+H]<sup>+</sup>: 381.1267; found 381.1261.



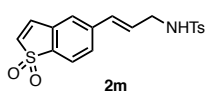

Prepared according to general procedure A using 5-bromobenzo[*b*]thiophene (1.17 g, 5.50 mmol). The crude residue was dissolved in dichloromethane (22 mL). *m*CPBA (77% by weight, 2.70 g, 11.0 mmol, 1.0 equiv) was added and the reaction mixture was stirred at room temperature. After 16 hours, the reaction mixture was washed with sat. NaHCO<sub>3(aq)</sub> (3 x 10 mL) and brine (10 mL), dried over NaSO<sub>4</sub>, filtered, concentrate under reduced pressure and purified by silica gel column chromatography (10 to 100% ethyl acetate in hexanes) to give **2m** (1.49, 72%) as white solid. <sup>1</sup>H NMR (500 MHz, 10% CD<sub>3</sub>OD/CDCl<sub>3</sub>): δ 7.62 (d, *J* = 8.3 Hz, 2H), 7.45 (d, *J* = 7.8 Hz, 1H), 7.24–7.08 (m, 5H), 6.64 (d, *J* = 6.9 Hz, 1H), 6.34 (d, *J* = 15.9 Hz, 1H), 6.05 (dt, *J* = 15.9, 5.9 Hz, 1H), 3.70 (s, 1H), 3.59 (dd, *J* = 5.9, 1.6 Hz, 2H), 2.26 (s, 3H); <sup>13</sup>C NMR (125.7 MHz, 10% CD<sub>3</sub>OD/CDCl<sub>3</sub>): δ 143.5, 142.3, 136.9, 134.8, 132.5, 131.8, 130.8, 129.9, 129.6, 129.1, 128.5, 126.9, 122.9, 121.3, 44.6, 21.2; FTIR (thin film) ν 3279 (br. m), 1599 (w), 1291 (s), 1138 (s), 730 (m) cm<sup>-1</sup>; HRMS (ESI-TOF) Calc'd for C<sub>18</sub>H<sub>17</sub>NO<sub>4</sub>S<sub>2</sub> [M+H]<sup>+</sup>: 376.0672; found 376.0666.

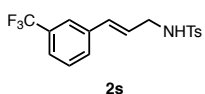

Prepared according to general procedure A using 1-bromo-3-(trifluoromethyl)benzene (0.77 mL, 5.50 mmol). The crude residue was purified by silica gel column chromatography (10 to 100% ethyl acetate in hexanes) to give **2s** (1.41 g, 72% overall yield) as a white solid. <sup>1</sup>H NMR (500 MHz, CDCl<sub>3</sub>): δ 7.80 (dd, *J* = 8.1, 1.3 Hz, 2H), 7.48–7.44 (m, 1H), 7.42–7.36 (m, 3H), 7.27 (d, *J* = 7.6 Hz, 2H), 6.45 (dd, *J* = 15.9, 1.5 Hz, 1H), 6.06 (dtd, *J* = 15.9, 6.2, 1.2 Hz, 1H), 5.35 (t, *J* = 6.2 Hz, 1H), 3.96–3.62 (m, 2H), 2.37 (s, 3H); <sup>13</sup>C NMR (125.7 MHz, CDCl<sub>3</sub>): δ 43.7, 137.2, 137.1, 131.3, 130.9 (q, *J* = 32.1 Hz), 129.8, 129.7, 127.3, 124.3 (q, *J* = 3.8 Hz), 123.9 (q, *J* = 272.3 Hz), 123.0 (q, *J* = 3.9 Hz), 45.2, 21.4; <sup>19</sup>F NMR (470.4 MHz, CDCl<sub>3</sub>): δ -62.87 (s); FTIR (thin film) ν 3277 (br. s), 1598 (w), 1328 (s), 1154 (s), 965 (m), 661 (s) cm<sup>-1</sup>; HRMS (ESI-TOF) Calc'd for C<sub>17</sub>H<sub>16</sub>F<sub>3</sub>NO<sub>2</sub>S [M+H]<sup>+</sup>: 356.0927; found 356.0923.

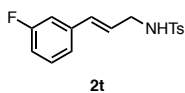

Prepared according to general procedure A using 1-bromo-3-fluoro-benzene (0.77 mL, 5.50 mmol). The crude residue was purified by silica gel column chromatography (10 to 100% ethyl acetate in hexanes) to give **2t** (1.68 g, 78% overall yield) as a white solid. <sup>1</sup>H NMR (500 MHz, CDCl<sub>3</sub>): δ 7.79 (d, *J* = 8.3 Hz, 2H), 7.37–7.15 (m, 3H), 7.09–6.79 (m, 3H), 6.38 (d, *J* = 15.8 Hz, 1H), 5.98 (dt, *J* = 15.9, 6.2 Hz, 1H), 5.25 (t, *J* = 6.2 Hz, 1H), 3.74 (td, *J* = 6.2, 1.6 Hz, 2H), 2.38 (s, 3H); <sup>13</sup>C NMR (125.7 MHz, CDCl<sub>3</sub>): δ 163.0 (d, *J* = 245.2 Hz), 143.6, 138.6 (d, *J* = 8.0 Hz), 137.1, 131.6 (d, *J* = 2.8 Hz), 130.0 (d, *J* = 8.4 Hz), 129.8, 127.3, 125.8, 122.4 (d, *J* = 3.0 Hz), 114.6 (d, *J* = 21.4 Hz), 112.8 (d, *J* = 22.0 Hz), 45.2, 21.5; <sup>19</sup>F NMR (470.4 MHz, CDCl<sub>3</sub>): δ -113.36 (td, *J* = 9.1, 5.9 Hz); FTIR (thin film) ν 3275 (br. s), 1583 (m), 1092 (s), 964 (m), 661 (s) cm<sup>-1</sup>; HRMS (ESI-TOF) Calc'd for C<sub>16</sub>H<sub>16</sub>FNO<sub>2</sub>S [M+H]<sup>+</sup>: 306.0959; found 306.0953.

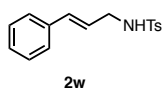

Prepared according to general procedure A using bromobenzene (0.77 mL, 5.50 mmol). The crude residue was purified by silica gel column chromatography (10 to 100% ethyl acetate in hexanes) to give **2w** (1.19 g, 75% overall yield) as a white solid. <sup>1</sup>H NMR (500 MHz, CDCl<sub>3</sub>): δ 7.79 (d, *J* = 8.3 Hz, 2H), 7.32–7.17 (m, 7H), 6.43 (dd, *J* = 15.8, 1.6 Hz, 1H), 6.00 (dtd, *J* = 15.9, 6.4, 1.7 Hz, 1H), 5.04 (t, *J* = 6.4 Hz, 1H), 3.74 (td, *J* = 6.3, 1.6 Hz, 2H), 2.39 (s, 3H); <sup>13</sup>C NMR (125.7 MHz, CDCl<sub>3</sub>): δ 143.6, 137.2, 136.2, 133.0, 129.8, 128.6, 127.9, 127.3, 126.5, 124.2, 45.5, 21.6; FTIR (thin film) ν 3278 (br. s), 1598 (w), 1324 (m), 1157 (s), 967 (m), 493 (m) cm<sup>-1</sup>; HRMS (ESI-TOF) Calc'd for C<sub>16</sub>H<sub>17</sub>NO<sub>2</sub>S [M+H]<sup>+</sup>: 288.1053; found 288.1047.

## General Procedure B:

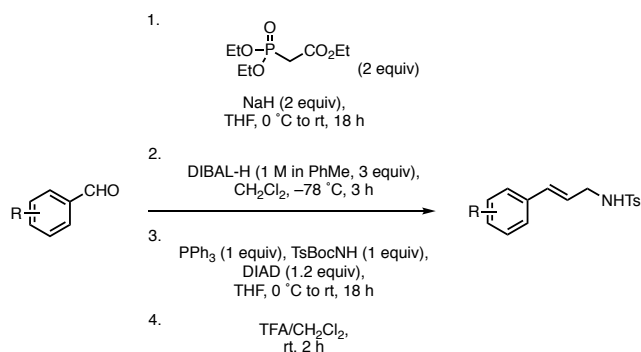

To a solution of triethyl phosphonoacetate (2.78 mL, 14.0 mmol, 2.0 equiv) in anhydrous tetrahydrofuran (28 mL) at 0 °C was added sodium hydride (60% by weight, 560 mg, 14.0 mmol, 2.0 equiv). The reaction mixture was stirred at that temperature for 30 minutes before the addition of benzaldehyde (7.00 mmol, 1.0 equiv) as a solution in tetrahydrofuran (5 mL). The resulting solution was allowed to warm to room temperature. After 18 hours, the reaction mixture was quenched with 1 M  $\text{HCl}_{(\text{aq})}$  (10 mL). The organic and aqueous layers were separated and the aqueous layer was extracted with ethyl acetate (2 x 20 mL). The combined organic layers were washed with brine (10 mL), dried over  $\text{NaSO}_4$ , filtered and concentrate under reduced pressure. The crude residue was dissolved in anhydrous dichloromethane (28 mL) and cooled to -78 °C. Diisobutylammonium hydride (1.0 M in toluene, 21.0 mmol, 3.0 equiv) was added dropwise, and reaction mixture was stirred at -78 °C for 3 hours. The reaction was quenched with a 1:1 mixture of 4 M  $\text{NaOH}_{(\text{aq})}$  and sat. Rochelle salt solution (20 mL), and the reaction mixture was allowed to warm to room temperature. The organic and aqueous layers were separated and the aqueous layer was extracted with ethyl acetate (2 x 40 mL). The combined organic layers were washed with brine (20 mL), dried over  $\text{NaSO}_4$ , filtered and concentrated under reduced pressure. The crude residue was dissolved in anhydrous tetrahydrofuran (28 mL) at 0 °C. Triphenylphosphine (1.84 g, 7.00 mmol, 1.0 equiv) and *N*-(*tert*-butoxycarbonyl)-*p*-toluenesulfonamide (1.90 g, 7.00 mmol, 1.0 equiv) were added followed by diisopropyl azodicarboxylate (1.65 mL, 8.40 mmol, 1.2 equiv). The reaction mixture was allowed to warm to room temperature. After 18 hours, the reaction mixture was concentrated under reduced pressure and purified by silica gel column chromatography (10 to 100% diethyl ether in hexanes). To a solution of the retrieved compound in dichloromethane (8 mL) was added trifluoroacetic acid (2 mL). The reaction mixture was stirred at room temperature for 2 hours. 1 M  $\text{NaOH}_{(\text{aq})}$  was added until the pH registered as neutral. The organic and aqueous layers were separated and the aqueous layer was extracted with ethyl acetate (2 x 20 mL). The combined organic layers were washed with brine (10 mL), dried over  $\text{NaSO}_4$ , filtered and concentrated under reduced pressure.

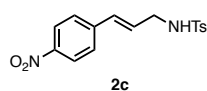

Prepared according to general procedure B using 4-nitrobenzaldehyde (1.06 mg, 7.00 mmol) to give **2c** (1.83 g, 79% overall yield) as a yellow solid.  $^1\text{H}$  NMR (500 MHz,  $\text{CDCl}_3$ ):  $\delta$  8.11 (d,  $J$  = 8.9 Hz, 1H), 7.79 (d,  $J$  = 8.3 Hz, 1H), 7.35 (d,  $J$  = 8.8 Hz, 1H), 7.32–7.24 (m, 1H), 6.53 (d,  $J$  = 16.0 Hz, 1H), 6.22 (dt,  $J$  = 15.9, 6.0 Hz, 1H), 5.21 (t,  $J$  = 6.3 Hz, 1H), 3.80 (td,  $J$  = 6.1, 1.6 Hz, 2H), 2.40 (s, 2H);  $^{13}\text{C}$  NMR (125.7 MHz,  $\text{CDCl}_3$ ):  $\delta$  147.1, 143.8, 142.8, 137.0, 130.5, 129.9, 129.6, 127.3, 127.0, 124.0, 45.1, 21.6; FTIR (thin film)  $\nu$  3279 (br. m), 1597 (m), 1515 (s), 1341 (s), 1158 (s), 551 (m)  $\text{cm}^{-1}$ ; HRMS (ESI-TOF) Calc'd for  $\text{C}_{16}\text{H}_{16}\text{N}_2\text{O}_4\text{S}$   $[\text{M}+\text{H}]^+$ : 333.0904; found 333.0915.

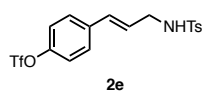

Prepared according to general procedure B using 4-formylphenyl trifluoromethanesulfonate<sup>1</sup> (1.78 g, 7.00 mmol) to give **2e** (2.04 g, 67% overall yield).  $^1\text{H}$  NMR (500 MHz,  $\text{CDCl}_3$ ):  $\delta$  7.79 (d,  $J$  = 8.1 Hz, 2H), 7.28 (d,  $J$  = 8.6 Hz, 4H), 7.17 (d,  $J$  = 8.7 Hz, 2H), 6.44 (d,  $J$  = 15.9 Hz, 1H), 6.04 (ddd,  $J$  = 15.9, 6.5, 5.7 Hz, 1H), 5.22 (t,  $J$  = 6.2 Hz,

1H), 3.76 (td,  $J = 6.2, 1.4$  Hz, 2H), 2.39 (s, 3H);  $^{13}\text{C}$  NMR (125.7 MHz,  $\text{CDCl}_3$ ):  $\delta$  148.9, 143.8, 137.1, 136.8, 129.9, 128.1, 127.2, 126.7, 121.5, 118.8 (q,  $J = 321.0$  Hz), 45.2, 21.5;  $^{19}\text{F}$  NMR (470.4 MHz,  $\text{CDCl}_3$ ):  $\delta$  -72.8 (s); FTIR (thin film)  $\nu$  3274 (br. m), 1598 (w), 1500 (m), 1422 (s), 1093 (s), 885 (s), 551 (m)  $\text{cm}^{-1}$ ; HRMS (ESI-TOF) Calc'd for  $\text{C}_{17}\text{H}_{16}\text{F}_3\text{NO}_5\text{S}_2$   $[\text{M}+\text{H}]^+$ : 436.0495; found 436.0490.

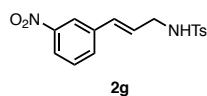

Prepared according to general procedure B using 3-nitrobenzaldehyde (1.06 mg, 7.00 mmol) to give **2g** (1.74 g, 75% overall yield) as a yellow solid.  $^1\text{H}$  NMR (500 MHz,  $\text{CDCl}_3$ ):  $\delta$  8.03 (d,  $J = 8.3$  Hz, 1H), 7.99 (s, 1H), 7.80 (d,  $J = 8.3$  Hz, 2H), 7.52 (d,  $J = 8.3$  Hz, 1H), 7.46–7.39 (m, 1H), 7.29 (d,  $J = 8.3$  Hz, 2H), 6.49 (d,  $J = 15.9$  Hz, 1H), 6.25–6.08 (m, 1H), 5.30 (s, 1H), 4.14–3.28 (m, 2H), 2.39 (s, 3H);  $^{13}\text{C}$  NMR (125.7 MHz,  $\text{CDCl}_3$ ):  $\delta$  148.5, 143.8, 138.1, 137.1, 132.3, 130.3, 129.9, 129.5, 127.9, 127.3, 122.4, 121.0, 45.0, 21.5; FTIR (thin film)  $\nu$  3279 (br. s), 1598 (w), 1526 (s), 1350 (s), 1157 (s), 815 (m), 550 (m)  $\text{cm}^{-1}$ ; HRMS (ESI-TOF) Calc'd for  $\text{C}_{16}\text{H}_{16}\text{N}_2\text{O}_4\text{S}$   $[\text{M}+\text{H}]^+$ : 333.0904; found 333.0900.

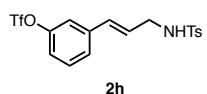

Prepared according to general procedure B using 3-formylphenyl trifluoromethanesulfonate<sup>2</sup> (1.78 g, 7.00 mmol) to give **2h** (2.16 g, 67% overall yield) as white solid.  $^1\text{H}$  NMR (500 MHz,  $\text{CDCl}_3$ ):  $\delta$  7.79 (d,  $J = 8.3$  Hz, 2H), 7.34 (t,  $J = 8.0$  Hz, 1H), 7.29 (d,  $J = 8.3$  Hz, 2H), 7.26–7.20 (m, 1H), 7.16–7.07 (m, 2H), 6.43 (dd,  $J = 15.9, 1.7$  Hz, 1H), 6.06 (dt,  $J = 15.8, 6.1$  Hz, 1H), 5.26 (t,  $J = 6.3$  Hz, 1H), 3.77 (td,  $J = 6.2, 1.6$  Hz, 2H), 2.39 (s, 3H);  $^{13}\text{C}$  NMR (125.7 MHz,  $\text{CDCl}_3$ ):  $\delta$  149.9, 143.8, 139.1, 137.1, 130.7, 130.4, 129.9, 127.3, 127.3, 126.4, 120.3, 119.0, 118.8 (q,  $J = 321.1$  Hz), 45.1, 21.5;  $^{19}\text{F}$  NMR (470.4 MHz,  $\text{CDCl}_3$ ):  $\delta$  -72.9 (s); FTIR (thin film)  $\nu$  3277 (br. m), 1599 (w), 1419 (s), 1208 (s), 844 (s), 571 (s)  $\text{cm}^{-1}$ ; HRMS (ESI-TOF) Calc'd for  $\text{C}_{17}\text{H}_{16}\text{F}_3\text{NO}_5\text{S}_2$   $[\text{M}+\text{H}]^+$ : 436.0495; found 436.0487.

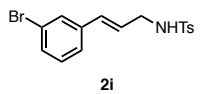

Prepared according to general procedure B using 3-bromobenzaldehyde (1.30 g, 7.00 mmol) to give **2i** (1.95 g, 76% overall yield) as a white solid.  $^1\text{H}$  NMR (500 MHz,  $\text{CDCl}_3$ ):  $\delta$  7.79 (d,  $J = 8.3$  Hz, 2H), 7.38–7.25 (m, 4H), 7.17–7.08 (m, 2H), 6.34 (dd,  $J = 15.9, 1.6$  Hz, 1H), 5.97 (dt,  $J = 15.9, 6.2$  Hz, 1H), 5.21 (t,  $J = 6.3$  Hz, 1H), 3.75 (td,  $J = 6.2, 1.6$  Hz, 2H), 2.40 (s, 3H);  $^{13}\text{C}$  NMR (125.7 MHz,  $\text{CDCl}_3$ ):  $\delta$  143.7, 138.5, 137.2, 131.3, 130.7, 130.1, 129.8, 129.3, 127.3, 126.0, 125.2, 122.7, 45.2, 21.6; FTIR (thin film)  $\nu$  3274 (br. s), 1592 (w), 1323 (m), 1154 (s), 814 (m), 572 (m)  $\text{cm}^{-1}$ ; HRMS (ESI-TOF) Calc'd for  $\text{C}_{16}\text{H}_{16}\text{BrNO}_2\text{S}$   $[\text{M}+\text{H}]^+$ : 366.0158; found 366.0149.

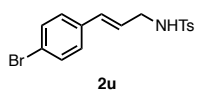

Prepared according to general procedure B using 4-bromobenzaldehyde (1.30 g, 7.00 mmol) to give **2u** (2.07 g, 81% overall yield) as a white solid.  $^1\text{H}$  NMR (500 MHz,  $\text{CDCl}_3$ ):  $\delta$  7.77 (d,  $J = 8.3$  Hz, 2H), 7.38 (d,  $J = 8.5$  Hz, 2H), 7.27 (d,  $J = 7.8$  Hz, 2H), 7.07 (d,  $J = 8.5$  Hz, 2H), 6.36 (dd,  $J = 15.9, 1.8$  Hz, 1H), 5.99 (dtd,  $J = 15.8, 6.2, 1.5$  Hz, 1H), 5.08 (s, 1H), 3.74–3.70 (m, 2H), 2.39 (s, 3H);  $^{13}\text{C}$  NMR (125.7 MHz,  $\text{CDCl}_3$ ):  $\delta$  143.6, 137.1, 135.2, 131.7, 129.8, 127.3, 125.2, 121.7, 45.4, 21.6; FTIR (thin film)  $\nu$  3260 (br. s), 1598 (w), 1487 (m), 1320 (m), 1156 (s), 811 (m), 575 (m)  $\text{cm}^{-1}$ ; HRMS (ESI-TOF) Calc'd for  $\text{C}_{16}\text{H}_{16}\text{BrNO}_2\text{S}$   $[\text{M}+\text{H}]^+$ : 365.0080; found 365.0078.

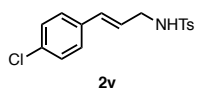

Prepared according to general procedure B using 4-chlorobenzaldehyde (1.30 g, 7.00 mmol) to give **2v** (1.87 g, 83% overall yield) as a white solid.  $^1\text{H}$  NMR (500 MHz,  $\text{CDCl}_3$ ):  $\delta$  7.81–7.76 (m, 2H), 7.30–7.26 (m, 2H), 7.25–7.21 (m, 2H), 7.18–7.11 (m, 2H), 6.38 (dd,  $J = 15.8, 1.7$  Hz, 1H), 6.11–5.82 (m, 1H), 5.10 (s, 1H), 3.71–3.75 (m, 2H), 2.40 (s, 3H);  $^{13}\text{C}$  NMR (125.7 MHz,  $\text{CDCl}_3$ ):  $\delta$  43.6, 137.1, 134.8, 133.5, 131.7, 129.8, 128.7, 127.7, 127.3, 125.0, 45.4, 21.6; FTIR (thin film)  $\nu$  3275 (br. s), 1597 (w), 1491 (s), 1154 (s), 967 (m), 550 (s)  $\text{cm}^{-1}$ ; HRMS (ESI-TOF) Calc'd for  $\text{C}_{16}\text{H}_{16}\text{ClNO}_2\text{S}$   $[\text{M}+\text{H}]^+$ : 321.0585; found 321.0585.

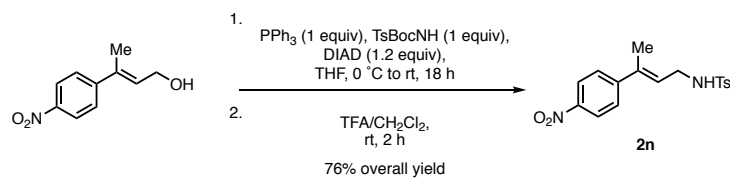

(*E*)-3-(4-Nitrophenyl)but-2-en-1-ol<sup>3</sup> (965 g, 5.00 mmol, 1.0 equiv) was dissolved in anhydrous tetrahydrofuran (50 mL) at 0 °C. Triphenylphosphine (1.32 g, 5.00 mmol, 1.0 equiv) and *N*-(*tert*-butoxycarbonyl)-*p*-toluenesulfonamide (1.36 g, 5.00 mmol, 1.0 equiv) were added followed by diisopropyl azodicarboxylate (1.18 mL, 6.0 mmol, 1.2 equiv). The reaction mixture was allowed to warm to room temperature. After 18 hours, the reaction mixture was concentrated under reduced pressure and purified by silica gel column chromatography (10 to 100% diethyl ether in hexanes). To a solution of the retrieved compound in dichloromethane (8 mL) was added trifluoroacetic acid (2 mL). The reaction mixture was stirred at room temperature for 2 hours. 1 M NaOH<sub>(aq)</sub> was added until the pH registered as neutral. The organic and aqueous layers were separated and the aqueous layer was extracted with ethyl acetate (2 x 20 mL). The combined organic layers were washed with brine (10 mL), dried over Na<sub>2</sub>SO<sub>4</sub>, filtered, concentrated under reduced pressure and purified by silica gel column chromatography (10 to 100% diethyl ether in hexanes) to give **2n** (1.32 g, 76%) as a yellow solid. <sup>1</sup>H NMR (500 MHz, CDCl<sub>3</sub>): δ 8.08 (d, *J* = 8.7 Hz, 2H), 7.79 (d, *J* = 8.4 Hz, 2H), 7.37–7.25 (m, 4H), 5.77–5.71 (m, 1H), 5.37 – 5.31 (m, 1H), 3.89–3.74 (m, 2H), 2.40 (s, 3H), 1.97 (s, 3H); <sup>13</sup>C NMR (125.7 MHz, CDCl<sub>3</sub>): δ 148.9, 146.9, 143.7, 137.1, 137.0, 129.8, 127.3, 126.5, 126.4, 123.5, 41.7, 21.6, 15.9; FTIR (thin film) ν 3277 (br. m), 1595 (m), 1512 (s), 1341 (s), 1155(s), 666 (m) cm<sup>-1</sup>; HRMS (ESI-TOF) Calc'd for C<sub>17</sub>H<sub>18</sub>N<sub>2</sub>O<sub>4</sub>S [M+H]<sup>+</sup>: 347.1060; found 347.1054.

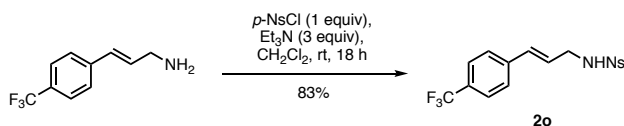

To a solution of (*E*)-3-(4-(trifluoromethyl)phenyl)prop-2-en-1-amine<sup>4</sup> (302 mg, 1.50 mmol, 1 equiv) in dichloromethane (7.5 mL) was added triethylamine (0.63 mL, 4.50 mmol, 3 equiv) followed by 4-nitrobenzenesulfonyl chloride (332 mg, 1.50 mmol, 1 equiv). The reaction mixture was allowed to stir at room temperature overnight before being quenched by 1 M HCl<sub>(aq)</sub> (3 mL). The organic and aqueous layers were separated and the aqueous layer was extracted with dichloromethane (2 x 5 mL). The combined organic layers were washed with brine (5 mL), dried over Na<sub>2</sub>SO<sub>4</sub>, filtered, concentrated under reduced pressure and purified by silica gel column chromatography (20 to 70% ethyl acetate in hexanes) to give **2o** (481 mg, 83%) as a yellow solid. <sup>1</sup>H NMR (500 MHz, DMSO-*d*<sub>6</sub>): δ 8.37 (d, *J* = 7.8 Hz, 2H), 8.16–8.10 (m, 2H), 8.10–8.04 (m, 2H), 7.56 (d, *J* = 7.8 Hz, 2H), 6.59 (d, *J* = 16.4 Hz, 1H), 6.38–6.29 (m, 1H), 4.83–4.72 (m, 1H), 3.78–3.67 (m, 2H); <sup>13</sup>C NMR (125.7 MHz, DMSO-*d*<sub>6</sub>): δ <sup>13</sup>C NMR (DMSO-*d*<sub>6</sub>) 156.2, 149.5, 146.4, 142.8, 130.6, 129.5, 128.2, 127.1, 124.6, 123.8, 123.7 (q, *J* = 272.4 Hz), 44.6; <sup>19</sup>F NMR (CDCl<sub>3</sub>) -62.8 (s); HRMS (ESI-TOF) Calc'd for C<sub>16</sub>H<sub>13</sub>F<sub>3</sub>N<sub>2</sub>O<sub>4</sub>S [M+H]<sup>+</sup>: 387.0632; found 387.0630.

## General Procedure C:

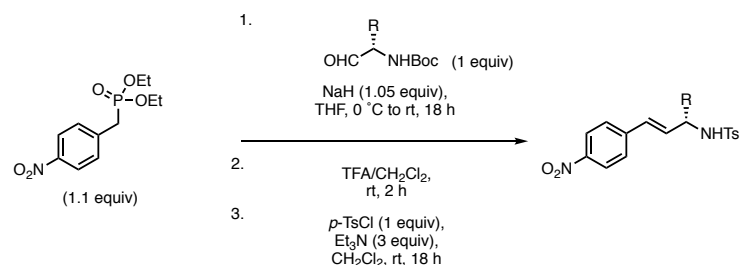

To a solution of diethyl (4-nitrobenzyl)phosphonate<sup>5</sup> (901 mg, 3.30 mmol, 1.1 equiv) in anhydrous tetrahydrofuran (12 mL) at 0 °C was added sodium hydride (60% by weight, 119 mg, 2.99 mmol, 1.0 equiv). The reaction mixture was allowed to stir at 0 °C for 30 minutes before the addition of a solution of aldehyde (3.00 mmol, 1 equiv). The reaction mixture was allowed to warm to room temperature. After 18 hours, the reaction was quenched with 1 M  $\text{HCl}_{(\text{aq})}$  (10 mL). The organic and aqueous layers were separated and the aqueous layer was extracted with ethyl acetate (2 x 20 mL). The combined organic layers were washed with brine (10 mL), dried over  $\text{NaSO}_4$ , filtered and concentrated under reduced pressure. The crude residue was dissolved in dichloromethane (6 mL) was added trifluoroacetic acid (1.5 mL). The reaction mixture was stirred at room temperature for 2 hours. 1 M  $\text{NaOH}_{(\text{aq})}$  was added until the pH registered as neutral. The organic and aqueous layers were separated and the aqueous layer was extracted with ethyl acetate (2 x 20 mL). The combined organic layers were washed with brine (10 mL), dried over  $\text{NaSO}_4$ , filtered and concentrated under reduced pressure. The crude residue was dissolved in dichloromethane (15 mL). Triethylamine (1.26 mL, 9.00 mmol, 3 equiv) followed by *p*-toluenesulfonyl chloride (573 mg, 3.00 mmol, 1 equiv). The resulting solution was stirred at room temperature. After 18 hours, the reaction mixture was washed with brine (10 mL), dried over  $\text{NaSO}_4$ , filtered and concentrated under reduced pressure.

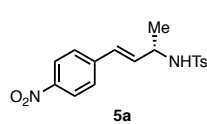

Prepared according to general procedure C using Boc-L-alaninal (520 mg, 3.00 mmol) followed by purification by silica gel column chromatography (10 to 100% diethyl ether in hexanes) to give **5a** as a yellow solid (823 mg, 72% overall yield). <sup>1</sup>H NMR (500 MHz,  $\text{CDCl}_3$ ):  $\delta$  8.14–8.03 (m, 2H), 7.78 (d,  $J$  = 8.3 Hz, 2H), 7.36–7.15 (m, 4H), 6.40 (d,  $J$  = 15.9 Hz, 1H), 6.16–6.01 (m, 1H), 5.38 (d,  $J$  = 7.7 Hz, 1H), 4.24–3.99 (m, 1H), 2.33 (s, 3H), 1.27 (d,  $J$  = 6.8 Hz, 3H); <sup>13</sup>C NMR (125.7 MHz,  $\text{CDCl}_3$ ):  $\delta$  147.0, 143.6, 143.0, 138.0, 135.4, 129.7, 128.4, 127.3, 127.0, 123.9, 51.6, 21.6 (d,  $J$  = 17.2 Hz); FTIR (thin film)  $\nu$  3271 (br. m), 1595 (m), 1512 (s), 1339 (s), 1147 (s), 814 (s), 663 (s)  $\text{cm}^{-1}$ ; HRMS (ESI-TOF) Calc'd for  $\text{C}_{17}\text{H}_{18}\text{N}_2\text{O}_4\text{S}$   $[\text{M}+\text{H}]^+$ : 347.1060; found 347.1054;  $[\alpha]_{\text{D}}^{24} = -169^\circ$  (c 1.0,  $\text{CHCl}_3$ ).

98% ee, Chiral HPLC (OD-H, 30% isopropanol in hexanes, 1.0 mL/min,  $\lambda$  = 230 nm);  $t_{\text{R}}(\text{major})$  = 10.0 min,  $t_{\text{R}}(\text{minor})$  = 12.4 min.

Racemic sample:

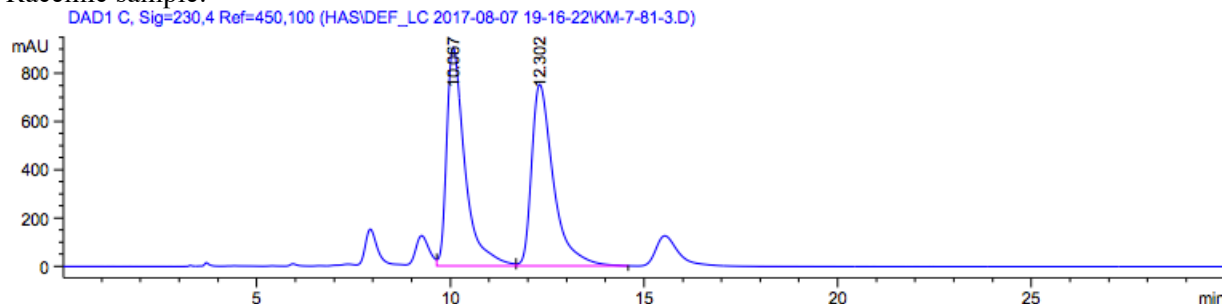

Signal 3: DAD1 C, Sig=230,4 Ref=450,100

| Peak # | RetTime [min] | Type | Width [min] | Area [mAU*s] | Height [mAU] | Area %  |
|--------|---------------|------|-------------|--------------|--------------|---------|
| 1      | 10.067        | VV   | 0.4907      | 2.97686e4    | 907.42834    | 50.2442 |
| 2      | 12.302        | VB   | 0.5870      | 2.94793e4    | 752.63397    | 49.7558 |

Totals : 5.92479e4 1660.06232

Enriched sample:

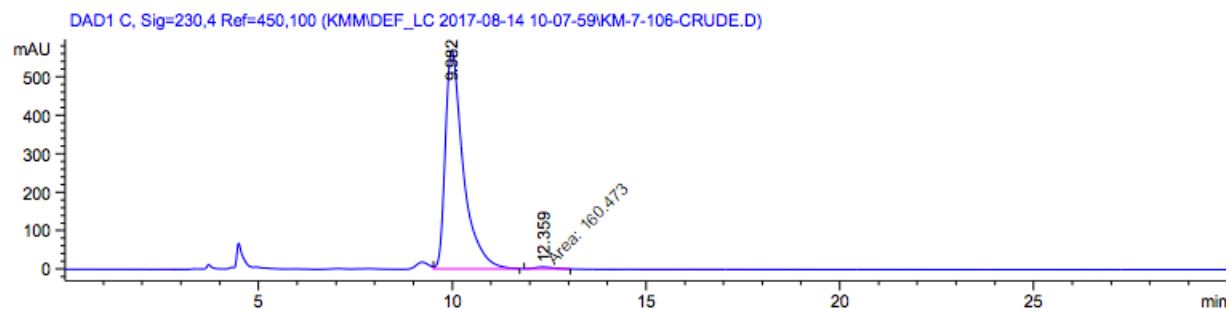

Signal 3: DAD1 C, Sig=230,4 Ref=450,100

| Peak # | RetTime [min] | Type | Width [min] | Area [mAU*s] | Height [mAU] | Area %  |
|--------|---------------|------|-------------|--------------|--------------|---------|
| 1      | 9.982         | VB   | 0.4816      | 1.84537e4    | 570.11945    | 99.1379 |
| 2      | 12.359        | MM   | 0.5673      | 160.47330    | 4.71452      | 0.8621  |

Totals : 1.86141e4 574.83396

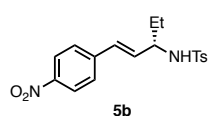

Prepared according to general procedure C using (S)-tert-butyl 1-oxobutan-2-ylcarbamate<sup>6</sup> (562 mg, 3.00 mmol) followed by purification by silica gel column chromatography (10 to 100% diethyl ether in hexanes) to give **5b** as a yellow solid (756 mg, 70% overall yield). <sup>1</sup>H NMR (500 MHz, CDCl<sub>3</sub>): δ 8.06 (d, *J* = 8.8 Hz, 2H), 7.75 (d, *J* = 8.3 Hz, 2H), 7.22 (d, *J* = 8.8 Hz, 2H), 7.17 (d, *J* = 8.2 Hz, 2H), 6.30 (d, *J* = 15.9 Hz, 1H), 5.97 (dd, *J* = 15.9, 7.4 Hz, 1H), 5.47 (d, *J* = 8.0 Hz, 1H), 4.05–3.61 (m, 1H), 2.27 (s, 3H), 1.81–1.36 (m, *J* = 6.9 Hz, 2H), 0.85 (t, *J* = 7.4 Hz, 3H); <sup>13</sup>C NMR (125.7 MHz, CDCl<sub>3</sub>): δ 146.9, 143.4, 143.0, 138.1, 134.1, 129.6, 129.3, 127.3, 126.9, 123.8, 57.6, 28.6, 21.4, 10.0; FTIR (thin film) ν 3274 (br. m), 1595 (m), 1339 (s), 663 (s) cm<sup>-1</sup>; HRMS (ESI-TOF) Calc'd for C<sub>18</sub>H<sub>20</sub>N<sub>2</sub>O<sub>4</sub>S [M+H]<sup>+</sup>: 361.1217; found 361.1216; [α]<sub>D</sub><sup>24</sup> = -142.7° (c 1.0, CH<sub>3</sub>CN).

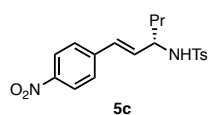

Prepared according to general procedure C using carbamic acid, [(1S)-1-formylbutyl], 1,1-dimethylethyl ester<sup>7</sup> (604 mg, 3.00 mmol) followed by purification by silica gel column chromatography (10 to 100% diethyl ether in hexanes) to give **5c** as a yellow solid (764 mg, 68% overall yield). <sup>1</sup>H NMR (500 MHz, CDCl<sub>3</sub>): δ 8.06 (d, *J* = 8.8 Hz, 2H), 7.75 (d, *J* = 8.3 Hz, 2H), 7.21 (d, *J* = 8.8 Hz, 2H), 7.17 (d, *J* = 7.7 Hz, 2H), 6.29 (dd, *J* = 16.0, 0.9 Hz, 1H), 5.97 (dd, *J* = 15.9, 7.5 Hz, 1H), 5.39 (d, *J* = 8.3 Hz, 1H), 4.00–3.87 (m, 1H), 2.27 (s, 3H), 1.63–1.45 (m, 2H), 1.42–1.18 (m, 2H), 0.83 (t, *J* = 7.3 Hz, 3H); <sup>13</sup>C NMR (125.7 MHz, CDCl<sub>3</sub>): δ 146.9, 143.4, 143.0, 138.1, 134.4, 129.6, 129.1, 127.3, 126.9, 123.8, 56.0, 37.7, 21.5, 18.7, 13.7; FTIR (thin film) ν 3275 (br. m), 1596 (m), 1340 (s), 1158 (s), 667 (m) cm<sup>-1</sup>; HRMS (ESI-TOF) Calc'd for C<sub>19</sub>H<sub>22</sub>N<sub>2</sub>O<sub>4</sub>S [M+H]<sup>+</sup>: 375.1373; found 375.1375; [α]<sub>D</sub><sup>24</sup> = -122° (c 1.0, CH<sub>3</sub>CN).

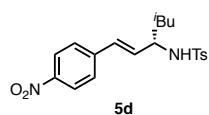

Prepared according to general procedure C using commercially available tert-butyl [(1S)-1-formyl-3-methylbutyl]carbamate (646 mg, 3.00 mmol) followed by purification by silica gel column chromatography (10 to 100% diethyl ether in hexanes) to give **5d** as a yellow solid (862 mg, 74% overall yield). <sup>1</sup>H NMR (500 MHz, CDCl<sub>3</sub>): δ 8.07 (d, *J* = 8.7 Hz, 2H), 7.74 (d, *J* = 8.3 Hz, 2H), 7.20 (d, *J* = 8.8 Hz, 2H), 7.18–7.14 (m, 2H), 6.29 (d, *J* = 15.9 Hz, 1H), 5.93 (dd, *J* = 15.9, 7.6 Hz, 1H), 5.30 (d, *J* = 8.0 Hz, 1H), 4.07–3.93 (m, 1H), 2.26 (s, 3H), 1.72–1.59 (m, 1H), 1.51–1.42 (m, 1H), 1.42–1.31 (m, 1H), 0.83 (dd, *J* = 17.8, 6.6 Hz, 6H); <sup>13</sup>C NMR (125.7 MHz, CDCl<sub>3</sub>): δ 146.9, 143.4, 143.0, 138.2, 134.5, 129.6, 129.0, 127.4, 126.9, 123.8, 54.6, 44.8, 24.4, 22.5, 22.2, 21.5; FTIR (thin film) ν 2956 (br. m), 1596 (m), 1367(s), 663 (s) cm<sup>-1</sup>; HRMS (ESI-TOF) Calc'd for C<sub>20</sub>H<sub>24</sub>N<sub>2</sub>O<sub>4</sub>S [M+H]<sup>+</sup>: 389.1530; found 389.1531; [α]<sub>D</sub><sup>27</sup> = -60.3° (c 1.0, CH<sub>3</sub>CN).

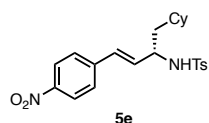

Prepared according to general procedure C using commercially available tert-butyl N-(1-cyclohexyl-3-oxopropan-2-yl)carbamate (766 mg, 3.00 mmol) followed by purification by silica gel column chromatography (10 to 100% diethyl ether in hexanes) to give **5e** as a yellow solid (913 mg, 71% overall yield). <sup>1</sup>H NMR (500 MHz, CDCl<sub>3</sub>): δ 8.13–8.03 (m, 2H), 7.74 (d, *J* = 8.3 Hz, 2H), 7.23 (d, *J* = 8.7 Hz, 2H), 7.18 (d, *J* = 7.9 Hz, 2H), 6.33 (d, *J* = 15.8 Hz, 1H), 5.97 (ddd, *J* = 15.9, 7.3, 0.8 Hz, 1H), 5.21 (d, *J* = 7.8 Hz, 1H), 4.10–3.92 (m, 1H), 2.28 (s, 3H), 1.74–0.67 (m, 13H); <sup>13</sup>C NMR (125.7 MHz, CDCl<sub>3</sub>): δ 146.9, 143.4, 143.1, 138.1, 134.9, 129.6, 128.8, 127.4, 126.9, 123.8, 53.7, 43.4, 33.7, 33.3, 32.8, 26.4, 26.2, 26.0, 21.5; FTIR (thin film) ν 2921 (br. m), 1596 (m), 1339 (s), 1157 (s), 667 (m) cm<sup>-1</sup>; HRMS (ESI-TOF) Calc'd for C<sub>23</sub>H<sub>28</sub>N<sub>2</sub>O<sub>4</sub>S [M+H]<sup>+</sup>: 429.1843; found 429.1838; [α]<sub>D</sub><sup>24</sup> = -83.3° (c 1.0, CH<sub>3</sub>CN).

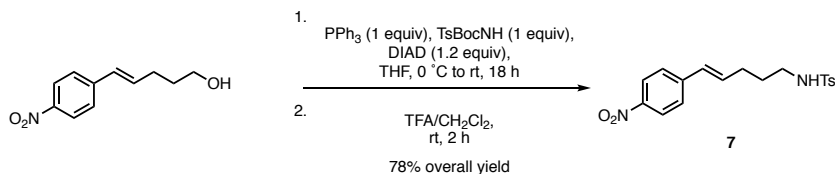

(E)-5-(3-Nitrophenyl)pent-4-en-1-ol<sup>8</sup> (1.04 g, 5.00 mmol, 1.0 equiv) was dissolved in anhydrous tetrahydrofuran (25 mL) at 0 °C. Triphenylphosphine (1.32 g, 5.00 mmol, 1.0 equiv) and *N*-(*tert*-butoxycarbonyl)-*p*-toluenesulfonamide (1.36 g, 5.00 mmol, 1.0 equiv) were added followed by diisopropyl azodicarboxylate (1.18 mL, 6.0 mmol, 1.2 equiv). The reaction mixture was allowed to warm to room temperature. After 18 hours, the reaction mixture was concentrated under reduced pressure and purified by silica gel column chromatography (10 to 100% diethyl ether in hexanes). To a solution of the retrieved compound in dichloromethane (8 mL) was added trifluoroacetic acid (2 mL). The reaction mixture was stirred at room temperature for 2 hours. 1 M NaOH<sub>(aq)</sub> was added until the pH registered as neutral. The organic and aqueous layers were separated and the aqueous layer was extracted with ethyl acetate (2 x 20 mL). The combined organic layers were washed with brine (10 mL), dried over NaSO<sub>4</sub>, filtered, concentrated under reduced pressure and purified by silica gel column chromatography (10 to 100% diethyl ether in hexanes) to give **7** (1.41 g, 78%) as a yellow solid. <sup>1</sup>H NMR (500 MHz, CDCl<sub>3</sub>): δ 8.11 (s, 1H), 8.05–7.99 (m, 2H), 7.82–7.72 (m, 4H), 7.62–7.55 (m, 2H), 7.49–7.40 (m, 2H), 7.30 (m, 5H), 6.38 (dd, *J* = 15.9, 1.5 Hz, 2H), 6.31–6.18 (m, 2H), 5.16–5.09 (m, 3H), 3.06–2.94 (m, 5H), 2.41 (s, 6H), 2.32–2.23 (m, 5H), 1.76–1.63 (m, 6H); <sup>13</sup>C NMR (125.7 MHz, CDCl<sub>3</sub>): δ 148.6, 143.5, 139.3, 137.0, 132.6, 132.0, 129.8, 129.4, 128.86, 127.2, 121.7, 120.5, 42.5, 29.8, 28.9, 21.6; FTIR (thin film) ν 3281 (br. m), 1654 (w), 1524 (s), 1153 (s), 965 (m), 550 (s) cm<sup>-1</sup>; HRMS (ESI-TOF) Calc'd for C<sub>18</sub>H<sub>20</sub>N<sub>2</sub>O<sub>4</sub>S [M+H]<sup>+</sup>: 361.1217; found 361.1210.

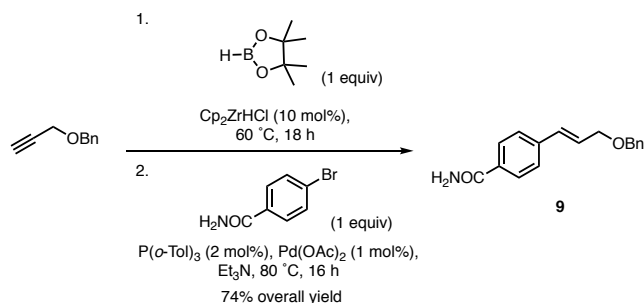

A mixture of benzyl propargyl ether (0.80 mL, 5.50 mmol, 1 equiv), pinacol borane (0.80 mL, 5.50 mmol, 1 equiv) and bis(cyclopentadienyl)zirconium(IV) chloride hydride (142 mg, 0.55 mmol, 10 mol%) was stirred at 60 °C for 18 hours and then flushed through a plug of silica with diethyl ether. To this crude residue was added 4-bromophenyl methyl sulfone (1.29 g, 5.50 mmol), tri(*o*-tolyl)phosphine (33.5 mg, 0.11 mmol, 2 mol%) and anhydrous triethylamine (4.0 mL) followed by palladium(II) acetate (12.7 mg, 0.057 mmol, 1 mol%). The reaction mixture was stirred at 80 °C for 16 hours. After cooling to room temperature, the reaction mixture was diluted with dichloromethane (100 mL), washed with water (20 mL), dried over NaSO<sub>4</sub>, filtered, concentrated under reduced pressure and purified by silica gel column chromatography (20 to 100% ethyl acetate in hexanes) to give **9** (1.09 g, 74%) as a yellow solid. <sup>1</sup>H NMR (500 MHz, CDCl<sub>3</sub>): δ 7.77 (d, *J* = 8.3 Hz, 2H), 7.46 (d, *J* = 8.3 Hz, 2H), 7.42–7.34 (m, 4H), 7.34–7.28 (m, 1H), 6.72–6.63 (m, 1H), 6.43 (ddd, *J* = 16.0, 6.0, 5.4 Hz, 1H), 4.59 (s, 2H), 4.22 (dd, *J* = 5.8, 1.5 Hz, 2H); <sup>13</sup>C NMR (125.7 MHz, 10% CD<sub>3</sub>OD/CDCl<sub>3</sub>): δ 69.9, 140.6, 138.1, 132.2, 131.3, 128.6, 128.0, 127.9, 127.9, 126.7, 72.6, 70.6; FTIR (thin film) ν 2531 (br. m), 2350 (br. m), 1623 (s), 1114 (m), 697 (m) cm<sup>-1</sup>; HRMS (ESI-TOF) Calc'd for C<sub>17</sub>H<sub>17</sub>NO<sub>2</sub> [M+H]<sup>+</sup>: 268.1332; found 268.1339.

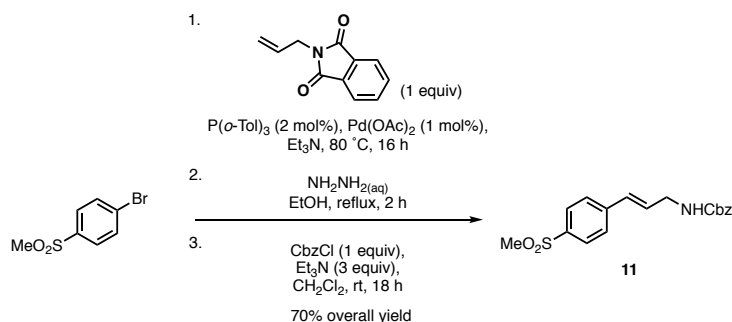

To a suspension of 4-bromophenyl methyl sulfone (1.29 g, 5.50 mmol), 2-allylisoinoline-1,3-dione (1.03 g, 5.50 mmol, 1.0 equiv) and tri(*o*-tolyl)phosphine (33.5 mg, 0.11 mmol, 2 mol%) in anhydrous triethylamine (4.0 mL) was added palladium(II) acetate (12.7 mg, 0.057 mmol, 1 mol%). The reaction mixture was stirred at 80 °C for 16 hours. After cooling to room temperature, the reaction mixture was diluted with dichloromethane (100 mL), washed with water (20 mL), dried over NaSO<sub>4</sub>, filtered and concentrated under reduced pressure. The crude residue was added to a solution of ethanol (40 mL) and hydrazine hydrate (~80% in water, 2 mL) and heated under reflux for 2 hours. After cooling, the suspension was filtered, washing with cold ethanol. The filtrate was concentrated under reduced pressure, re-dissolved in ethyl acetate (50 mL), washed with 1 M NaOH<sub>(aq)</sub> (2 x 20 mL) and brine (10 mL), dried over NaSO<sub>4</sub>, filtered and concentrated under reduced pressure. The crude residue was dissolved in dichloromethane (22 mL). Triethylamine (2.3 mL, 16.5 mmol, 3 equiv) followed by benzyl chloroformate (0.79 mL, 5.50 mmol, 1 equiv). The resulting solution was stirred at room temperature. After 18 hours, the reaction mixture was washed with brine (10 mL), dried over NaSO<sub>4</sub>, filtered, concentrated under reduced pressure and purified by silica gel column chromatography (0 to 10% methanol in dichloromethane) to give **11** (1.33 g, 70%) as a white solid. <sup>1</sup>H NMR (500 MHz, CDCl<sub>3</sub>): δ 7.83 (d, *J* = 8.5 Hz, 2H), 7.45 (d, *J* = 8.1 Hz, 2H), 7.40–7.29 (m, 5H), 6.52 (d, *J* = 16.0 Hz, 1H), 6.42 – 6.28 (m, 1H),



5.25–5.20 (m, 1H), 5.17–5.09 (m, 2H), 4.00 (dd,  $J = 8.3, 3.7$  Hz, 2H), 3.01 (s, 3H);  $^{13}\text{C}$  NMR (125.7 MHz,  $\text{CDCl}_3$ ):  $\delta$  156.5, 142.2, 139.0, 136.5, 130.7, 129.4, 128.6, 128.3, 128.2, 127.7, 127.1, 66.9, 44.6, 42.9; FTIR (thin film)  $\nu$  3358 (br. s), 1703 (m), 1144 (s), 764 (m), 535 (m)  $\text{cm}^{-1}$ ; HRMS (ESI-TOF) Calc'd for  $\text{C}_{18}\text{H}_{19}\text{NO}_4\text{S}$   $[\text{M}+\text{H}]^+$ : 346.1108; found 346.1113.

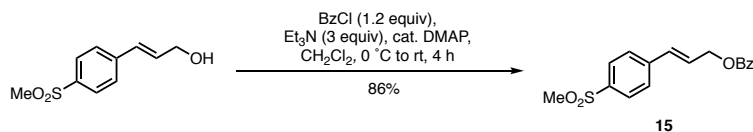

To a solution of (E)-3-(4-(methylsulfonyl)phenyl)prop-2-en-1-ol<sup>9</sup> (1.06 g, 5.00 mmol, 1 equiv) in dichloromethane at 0 °C was added triethylamine (2.09 mL, 15.0 mmol, 3.0 equiv), a catalytic amount of 4-dimethylaminopyridine and benzoyl chloride (0.70 mL, 6.00 mmol, 1.2 equiv). The reaction mixture was stirred at room temperature for 4 hours and then washed with water (10 mL), dried over  $\text{NaSO}_4$ , filtered, concentrated under reduced pressure and purified by silica gel column chromatography (10 to 100% diethyl ether in hexanes) to give **15** (1.36 g, 86%) as a yellow solid.  $^1\text{H}$  NMR (500 MHz,  $\text{CDCl}_3$ ):  $\delta$  8.12–8.06 (m, 2H), 7.90 (d,  $J = 8.4$  Hz, 2H), 7.63–7.57 (m, 3H), 7.47 (t,  $J = 7.8$  Hz, 2H), 6.85–6.75 (m, 1H), 6.62–6.52 (m, 1H), 5.03 (dd,  $J = 5.9, 1.5$  Hz, 2H), 3.05 (s, 3H);  $^{13}\text{C}$  NMR (125.7 MHz,  $\text{CDCl}_3$ ):  $\delta$  167.6, 142.1, 138.8, 134.2, 131.6, 130.5, 129.6, 128.6, 127.6, 127.2, 127.0, 44.6, 41.8; FTIR (thin film)  $\nu$  2925 (w), 1638 (m), 1293 (s), 1143 (s), 957 (m), 540 (m)  $\text{cm}^{-1}$ ; HRMS (ESI-TOF) Calc'd for  $\text{C}_{17}\text{H}_{16}\text{O}_4\text{S}$   $[\text{M}+\text{H}]^+$ : 317.0842; found 317.0836.

## Synthesis of Products.

To a solution of substrate (0.52 mmol, 1 equiv) and catalyst **1a**<sup>10</sup> (40.0 mg, 0.052 mmol, 10 mol%) in dichloromethane (3 mL) in a low-density polyethylene tube at  $-78\text{ }^{\circ}\text{C}$  was added HF•pyridine (py•9HF, 70% hydrogen fluoride by weight, 210  $\mu\text{L}$ , 15 equiv hydrogen fluoride) followed by *m*CPBA (77% by weight, 128 mg, 0.57 mmol, 1.1 equiv). The reaction mixture was warmed to  $-30\text{ }^{\circ}\text{C}$  and stirred at that temperature for 16 hours. The heterogeneous mixture was transferred carefully into a vigorously stirred suspension of basic alumina (4.0 g) in dichloromethane at  $-78\text{ }^{\circ}\text{C}$ . The resulting suspension was allowed to warm to room temperature and filtered, washing with 200 mL dichloromethane. The combined filtrate was concentrated under reduced pressure.

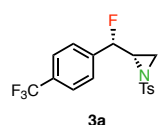

Prepared according to the general procedure using **2a** (185 mg, 0.52 mmol). After work-up, the crude residue was purified by silica gel column chromatography (10 to 30% diethyl ether in hexanes) to give **3a** (138 mg, 71%) as a white solid in 94% ee. <sup>1</sup>H NMR (500 MHz, CDCl<sub>3</sub>):  $\delta$  7.65 (d,  $J$  = 8.1 Hz, 2H), 7.47 (d,  $J$  = 8.0 Hz, 2H), 7.31 (d,  $J$  = 8.0 Hz, 2H), 7.21 (d,  $J$  = 8.0 Hz, 2H), 5.40 (dd,  $J$  = 45.8, 4.5 Hz, 1H), 3.12 (ddt,  $J$  = 15.8, 7.1, 4.3 Hz, 1H), 2.81 (dd,  $J$  = 7.2, 1.9 Hz, 1H), 2.47 (d,  $J$  = 4.3 Hz, 1H), 2.40 (s, 3H); <sup>13</sup>C NMR (125.7 MHz, CDCl<sub>3</sub>):  $\delta$  145.1, 140.1 (d,  $J$  = 21.6 Hz), 134.4, 131.0 (q,  $J$  = 32.1 Hz), 129.7, 128.0, 126.0 (d,  $J$  = 7.0 Hz), 125.5 (d,  $J$  = 3.8 Hz), 123.9 (q,  $J$  = 272.3 Hz), 89.7 (d,  $J$  = 181.2 Hz), 42.8 (d,  $J$  = 25.9 Hz), 29.4 (d,  $J$  = 7.1 Hz), 21.6; <sup>19</sup>F NMR (470.4 MHz, CDCl<sub>3</sub>):  $\delta$  -62.7, -188.7 (dd,  $J$  = 45.7, 15.8 Hz); FTIR (thin film)  $\nu$  2934 (w), 1596 (w), 1319 (s), 1064 (s), 683 (s), 520 (m) cm<sup>-1</sup>; HRMS (ESI-TOF) Calc'd for C<sub>17</sub>H<sub>15</sub>F<sub>4</sub>NO<sub>2</sub>S [M+H]<sup>+</sup>: 374.0832; found 374.0830;  $[\alpha]_{\text{D}}^{25}$  = +13.9° (c 1.0, CH<sub>3</sub>CN)

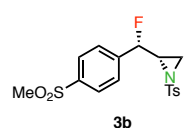

Prepared according to the general procedure using **2b** (190 mg, 0.52 mmol). After work-up, the crude residue was purified by silica gel column chromatography (dichloromethane) to give **3b** (173 mg, 87%) as a white solid in 94% ee. Crystals of **3b** were grown by allowing a hot solution of the compound in ethyl acetate cool to room temperature. <sup>1</sup>H NMR (500 MHz, CDCl<sub>3</sub>):  $\delta$  7.81 (d,  $J$  = 8.3 Hz, 2H), 7.65 (d,  $J$  = 8.3 Hz, 2H), 7.42 (d,  $J$  = 8.4 Hz, 2H), 7.24 (d,  $J$  = 8.3 Hz, 2H), 5.44 (dd,  $J$  = 45.9, 4.5 Hz, 1H), 3.14 (ddt,  $J$  = 15.7, 7.0, 4.4 Hz, 1H), 3.02 (s, 3H), 2.80 (d,  $J$  = 7.1, 1H), 2.48–2.45 (m, 4H); <sup>13</sup>C NMR (125.7 MHz, CDCl<sub>3</sub>):  $\delta$  145.4, 142.1 (d,  $J$  = 21.6 Hz), 141.1, 134.2, 129.9, 128.0, 127.7, 126.7 (d,  $J$  = 7.2 Hz), 89.6 (d,  $J$  = 181.9 Hz), 44.6, 42.4 (d,  $J$  = 26.3 Hz), 29.6 (d,  $J$  = 6.9 Hz), 21.8; <sup>19</sup>F NMR (470.4 MHz, CDCl<sub>3</sub>):  $\delta$  -188.9 (dd,  $J$  = 45.9, 15.5 Hz); FTIR (thin film)  $\nu$  2926 (w), 1597 (w), 1307 (s), 1161 (s), 941 (m), 564 (m) cm<sup>-1</sup>; HRMS (ESI-TOF) Calc'd for C<sub>17</sub>H<sub>18</sub>FNO<sub>4</sub>S<sub>2</sub> [M+H]<sup>+</sup>: 384.0734; found 384.0730;  $[\alpha]_{\text{D}}^{27}$  = +18.8° (c 1.0, CH<sub>3</sub>CN).

94% ee, Chiral HPLC (AD-H, 40% isopropanol in hexanes, 1.0 mL/min,  $\lambda$  = 230 nm);  $t_{\text{R}}$ (major) = 12.4 min,  $t_{\text{R}}$ (minor) = 16.3 min.

Racemic sample:

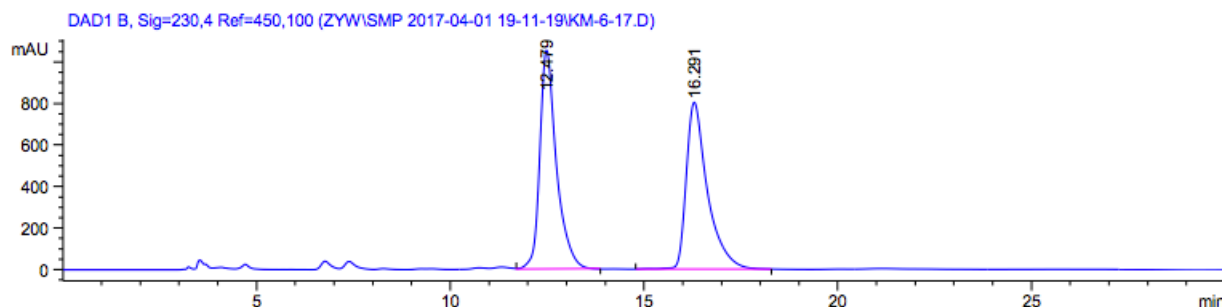

Signal 2: DAD1 B, Sig=230,4 Ref=450,100

| Peak # | RetTime [min] | Type | Width [min] | Area [mAU*s] | Height [mAU] | Area %  |
|--------|---------------|------|-------------|--------------|--------------|---------|
| 1      | 12.479        | VB   | 0.4436      | 3.15563e4    | 1053.15369   | 50.7936 |
| 2      | 16.291        | BB   | 0.5603      | 3.05703e4    | 802.69446    | 49.2064 |

Totals : 6.21266e4 1855.84814

Enriched sample:

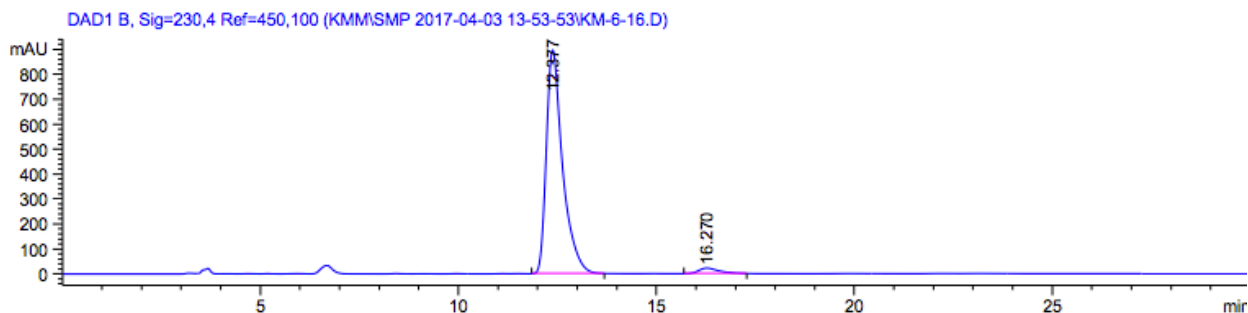

Signal 2: DAD1 B, Sig=230,4 Ref=450,100

| Peak # | RetTime [min] | Type | Width [min] | Area [mAU*s] | Height [mAU] | Area %  |
|--------|---------------|------|-------------|--------------|--------------|---------|
| 1      | 12.377        | BB   | 0.4251      | 2.55935e4    | 896.32416    | 96.9632 |
| 2      | 16.270        | BB   | 0.5404      | 801.55267    | 22.03313     | 3.0368  |

Totals : 2.63950e4 918.35729

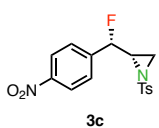

Prepared according to the general procedure using **2c** (173 mg, 0.52 mmol). After work-up, the crude residue was purified by silica gel column chromatography (dichloromethane) to give **3c** (135 mg, 74%) as a white solid in 97% ee. **3c** in 99% ee was obtained following precipitation of the compound from dichloromethane/hexanes. <sup>1</sup>H NMR (500 MHz, CDCl<sub>3</sub>): δ 8.02 (d, *J* = 8.6 Hz, 2H), 7.64–7.57 (m, 2H), 7.38–7.32 (m, 2H), 7.21–7.16 (m, 2H), 5.52 (dd, *J* = 45.8, 3.7 Hz, 1H), 3.10 (dddt, *J* = 15.4, 7.0, 4.2, 2.1 Hz, 1H), 2.82 (d, *J* = 7.1 Hz, 1H), 8.02 (d, *J* = 8.6 Hz, 1H), 7.64–7.57 (m, 1H), 7.38–7.32 (m, 2H), 7.21–7.16 (m, 2H), 5.52 (dd, *J* = 45.8, 3.7 Hz, 1H), 3.10 (dddt, *J* = 15.4, 7.0, 4.2, 2.1 Hz, 1H), 2.82 (d, *J* = 7.1 Hz, 1H), 2.53 (d, *J* = 4.3 Hz, 1H), 2.38 (s, 3H); <sup>13</sup>C NMR (125.7 MHz, CDCl<sub>3</sub>): δ 148.0, 145.3, 143.1 (d, *J* = 21.7 Hz), 134.2, 129.7, 128.1, 126.5 (d, *J* = 7.3 Hz), 123.7, 88.8 (d, *J* = 182.8 Hz), 42.6 (d, *J* = 25.2 Hz), 29.5 (d, *J* = 7.3 Hz), 21.6; <sup>19</sup>F NMR (470.4 MHz, CDCl<sub>3</sub>): δ -191.6 (dd, *J* = 45.5, 17.1 Hz); FTIR (thin film) ν 2923 (w), 1595 (w), 1519 (s), 1319 (s), 1158 (s), 727 (s), 563 (m) cm<sup>-1</sup>; HRMS (ESI-TOF) Calc'd for C<sub>16</sub>H<sub>15</sub>FN<sub>2</sub>O<sub>4</sub>S [M+H]<sup>+</sup>: 351.0809; found 351.0808; [α]<sub>D</sub><sup>24</sup> = +6.0° (c 1.0, CH<sub>3</sub>CN).

97% ee, Chiral HPLC (OD-H, 30% isopropanol in hexanes, 1.0 mL/min, λ = 254 nm); t<sub>R</sub>(major) = 17.8 min, t<sub>R</sub>(minor) = 22.4 min.

Racemic sample:

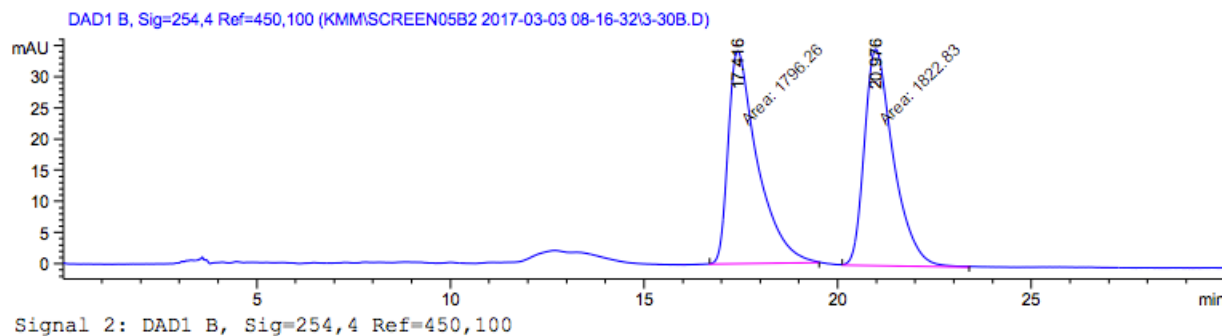

Enriched sample:

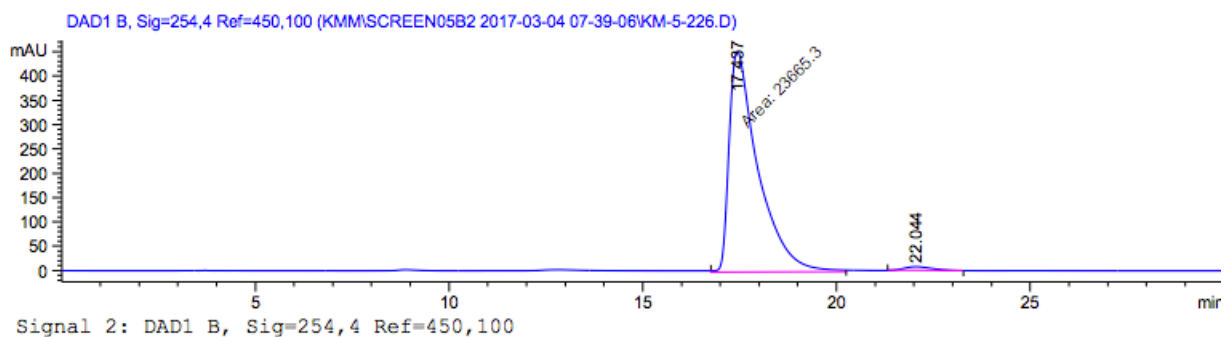

Upgraded (99% ee) sample:

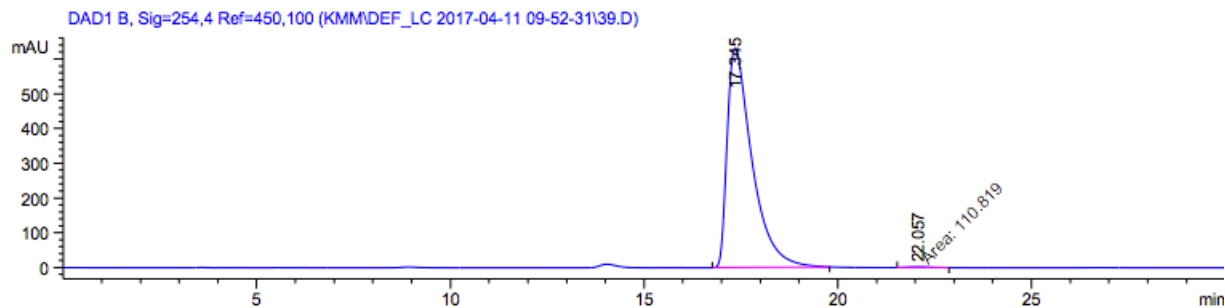

Signal 2: DAD1 B, Sig=254,4 Ref=450,100

| Peak # | RetTime [min] | Type | Width [min] | Area [mAU*s] | Height [mAU] | Area %  |
|--------|---------------|------|-------------|--------------|--------------|---------|
| 1      | 17.345        | BB   | 0.6671      | 2.81967e4    | 631.22870    | 99.6085 |
| 2      | 22.057        | MM   | 0.7423      | 110.81932    | 2.48825      | 0.3915  |

Totals : 2.83075e4 633.71694

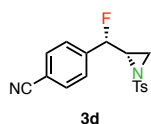

Prepared according to the general procedure using **2d** (162 mg, 0.52 mmol). After work-up, the crude residue was purified by silica gel column chromatography (10 to 40% diethyl ether in hexanes) to give **3d** (131 mg, 76%) as a white solid in 96% ee. <sup>1</sup>H NMR (500 MHz, CDCl<sub>3</sub>): δ 7.62 (d, *J* = 8.3 Hz, 2H), 7.51–7.47 (m, 2H), 7.33–7.28 (m, 2H), 7.25–7.20 (m, 2H), 5.43 (dd, *J* = 45.8, 4.3 Hz, 1H), 3.09 (ddt, *J* = 16.4, 7.1, 4.3 Hz, 1H), 2.79 (dd, *J* = 7.1, 1.9 Hz, 1H), 2.50–2.44 (m, 4H); <sup>13</sup>C NMR (125.7 MHz, CDCl<sub>3</sub>): δ 145.2, 141.2 (d, *J* = 21.7 Hz), 134.2, 132.3, 129.7, 128.0, 126.3 (d, *J* = 7.3 Hz), 118.3, 112.7, 89.2 (d, *J* = 182.1 Hz), 42.5 (d, *J* = 25.5 Hz), 29.5 (d, *J* = 7.2 Hz), 21.7; <sup>19</sup>F NMR (470.4 MHz, CDCl<sub>3</sub>): δ -190.6 (dd, *J* = 45.8, 16.5 Hz); FTIR (thin film) ν 3060 (w), 2227 (m), 1595 (m), 1415 (s), 977 (s), 562 (s) cm<sup>-1</sup>; HRMS (ESI-TOF) Calc'd for C<sub>17</sub>H<sub>15</sub>FN<sub>2</sub>O<sub>2</sub>S [M+H]<sup>+</sup>: 331.0911; found. 331.0905; [α]<sub>D</sub><sup>25</sup> = +29.2° (c 1.0, CH<sub>3</sub>CN)

96% ee, Chiral HPLC (AD-H, 20% isopropanol in hexanes, 1.0 mL/min, λ = 230 nm); t<sub>R</sub>(major) = 20.6 min, t<sub>R</sub>(minor) = 29.1 min.

Racemic sample:

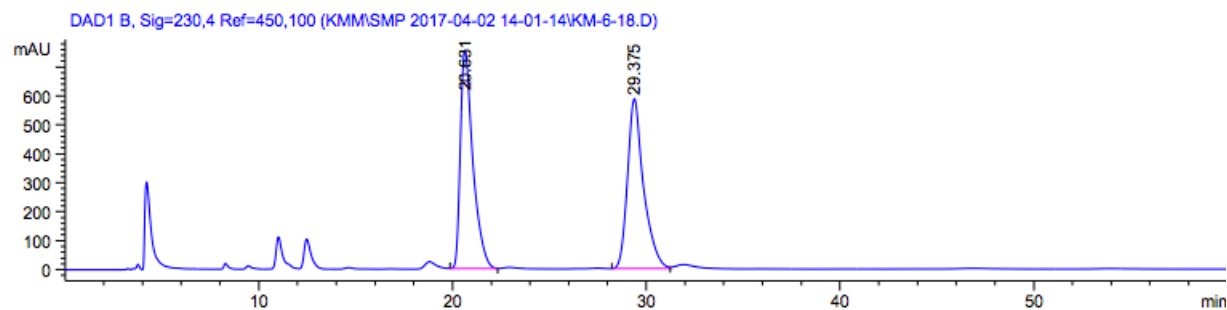

Signal 2: DAD1 B, Sig=230,4 Ref=450,100

| Peak # | RetTime [min] | Type | Width [min] | Area [mAU*s] | Height [mAU] | Area %  |
|--------|---------------|------|-------------|--------------|--------------|---------|
| 1      | 20.631        | BB   | 0.6713      | 3.38637e4    | 754.92334    | 50.0459 |
| 2      | 29.375        | BB   | 0.8364      | 3.38015e4    | 586.50360    | 49.9541 |

Totals : 6.76652e4 1341.42694

Enriched sample:

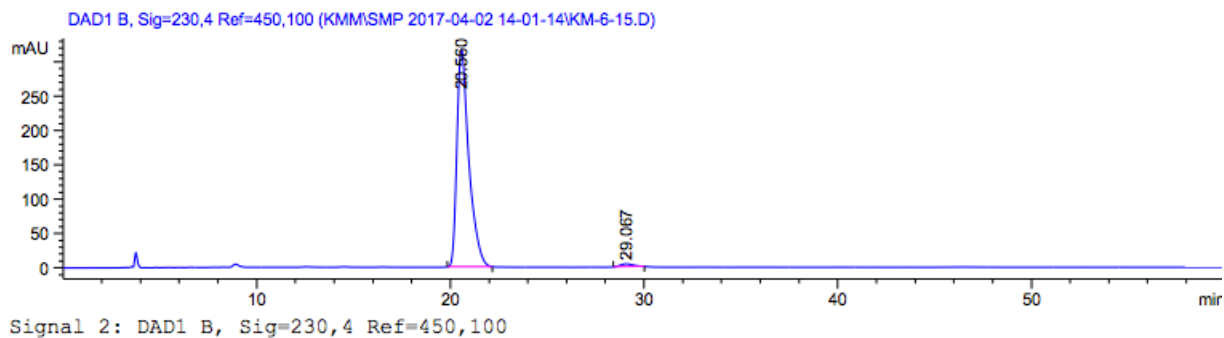

| Peak # | RetTime [min] | Type | Width [min] | Area [mAU*s] | Height [mAU] | Area %  |
|--------|---------------|------|-------------|--------------|--------------|---------|
| 1      | 20.560        | BB   | 0.6383      | 1.36080e4    | 317.32004    | 98.4951 |
| 2      | 29.067        | BB   | 0.6358      | 207.91110    | 4.31747      | 1.5049  |

Totals : 1.38159e4 321.63751

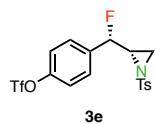

Prepared according to the general procedure using **2e** (226 mg, 0.52 mmol). After work-up, the crude residue was purified by silica gel column chromatography (10 to 50% diethyl ether in hexanes) to give **3e** (174 mg, 74%) as a white solid in 88% ee. <sup>1</sup>H NMR (500 MHz, CDCl<sub>3</sub>): δ 7.72 (d, *J* = 8.3 Hz, 2H), 7.34 (d, *J* = 8.8 Hz, 2H), 7.29 (d, *J* = 8.0 Hz, 2H), 7.22–7.16 (m, 2H), 5.33 (dd, *J* = 45.8, 4.7 Hz, 1H), 3.15 (ddt, *J* = 14.4, 7.1, 4.7 Hz, 1H), 2.79 (dd, *J* = 7.2, 2.1 Hz, 1H), 2.45 (s, 3H), 2.41 (d, *J* = 4.5 Hz, 1H); <sup>13</sup>C NMR (125.7 MHz, CDCl<sub>3</sub>): δ 149.4, 145.0, 139.1 (d, *J* = 22.0 Hz), 134.2, 130.6, 129.8, 128.0, 125.6 (d, *J* = 6.8 Hz), 121.7, 118.8 (d, *J* = 7.8 Hz), 118.7 (q, *J* = 320.6 Hz), 89.5 (d, *J* = 181.5 Hz), 42.3 (d, *J* = 26.5 Hz), 29.5 (d, *J* = 7.1 Hz), 21.6; <sup>19</sup>F NMR (470.4 MHz, CDCl<sub>3</sub>): δ -73.0, -185.1 (dd, *J* = 45.9, 14.5 Hz); FTIR (thin film) ν 1598 (w), 1503 (m), 1419 (s), 1135 (s), 883 (s), 529 (s) cm<sup>-1</sup>; HRMS (ESI-TOF) Calc'd for C<sub>17</sub>H<sub>15</sub>F<sub>4</sub>NO<sub>5</sub>S<sub>2</sub> [M+H]<sup>+</sup>: 454.0401; found 454.0391. [α]<sub>D</sub><sup>23</sup> = +16.3° (c 1.0, CHCl<sub>3</sub>).

88% ee, Chiral HPLC (AD-H, 20% isopropanol in hexanes, 1.0 mL/min, λ = 230 nm); t<sub>R</sub>(major) = 11.8 min, t<sub>R</sub>(minor) = 15.9 min.

Racemic sample:

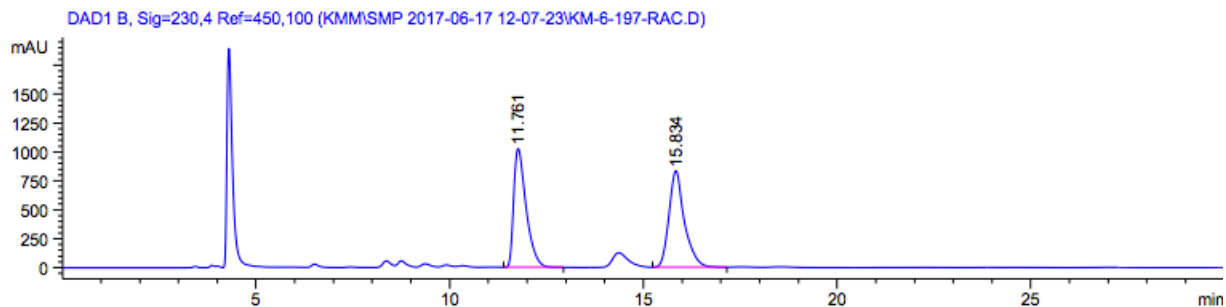

Signal 2: DAD1 B, Sig=230,4 Ref=450,100

| Peak # | RetTime [min] | Type | Width [min] | Area [mAU*s] | Height [mAU] | Area %  |
|--------|---------------|------|-------------|--------------|--------------|---------|
| 1      | 11.792        | MM   | 0.3815      | 2.72570e4    | 1190.68335   | 93.7618 |
| 2      | 15.914        | MM   | 0.4711      | 1813.46936   | 64.15755     | 6.2382  |

Totals : 2.90705e4 1254.84090

Enriched sample:

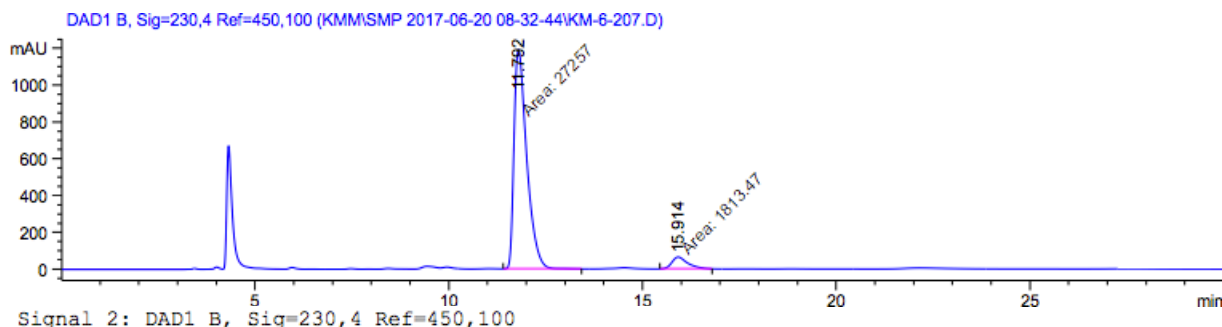

| Peak # | RetTime [min] | Type | Width [min] | Area [mAU*s] | Height [mAU] | Area %  |
|--------|---------------|------|-------------|--------------|--------------|---------|
| 1      | 11.792        | MM   | 0.3815      | 2.72570e4    | 1190.68335   | 93.7618 |
| 2      | 15.914        | MM   | 0.4711      | 1813.46936   | 64.15755     | 6.2382  |

Totals : 2.90705e4 1254.84090

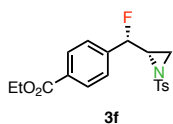

Prepared according to the general procedure using **2f** (187 mg, 0.52 mmol). After work-up, the crude residue was purified by silica gel column chromatography (10 to 40% diethyl ether in hexanes) to give **3f** (183 mg, 93%) as a white solid in 90% ee. <sup>1</sup>H NMR (500 MHz, CDCl<sub>3</sub>): δ 7.93–7.88 (m, 2H), 7.67 (d, *J* = 8.3 Hz, 2H), 7.27 (d, *J* = 7.9 Hz, 2H), 7.24–7.18 (m, 2H), 5.38 (dd, *J* = 46.0, 4.7 Hz, 1H), 4.40 (q, *J* = 7.2 Hz, 2H), 3.13 (ddt, *J* = 15.0, 7.3, 4.5 Hz, 1H), 2.81 (dd, *J* = 7.2, 2.0 Hz, 1H), 2.47 (d, *J* = 4.4 Hz, 1H), 2.40 (s, 3H), 1.42 (t, *J* = 7.2 Hz, 3H); <sup>13</sup>C NMR (125.7 MHz, CDCl<sub>3</sub>): δ 165.9, 144.9, 140.8 (d, *J* = 21.4 Hz), 134.3, 130.9, 129.7, 129.6, 128.0, 125.5 (d, *J* = 6.9 Hz), 90.1 (d, *J* = 180.8 Hz), 61.2, 42.7 (d, *J* = 26.2 Hz), 29.4 (d, *J* = 7.2 Hz), 21.6, 14.4; <sup>19</sup>F NMR (470.4 MHz, CDCl<sub>3</sub>): δ -188.09 (dd, *J* = 45.9, 15.2 Hz); FTIR (thin film) ν 2982 (br. w), 1714 (s), 1273 (s), 1090 (s), 724 (s), 564 (m) cm<sup>-1</sup>; HRMS (ESI-TOF) Calc'd for C<sub>19</sub>H<sub>20</sub>FNO<sub>4</sub>S [M+H]<sup>+</sup>: 378.1170; found 378.1168; [α]<sub>D</sub><sup>25</sup> = +13.1° (c 1.0, CH<sub>3</sub>CN).

90% ee, Chiral HPLC (AD-H, 40% isopropanol in hexanes, 1.0 mL/min, λ = 230 nm); t<sub>R</sub>(major) = 8.2 min, t<sub>R</sub>(minor) = 11.8 min.

Racemic sample:

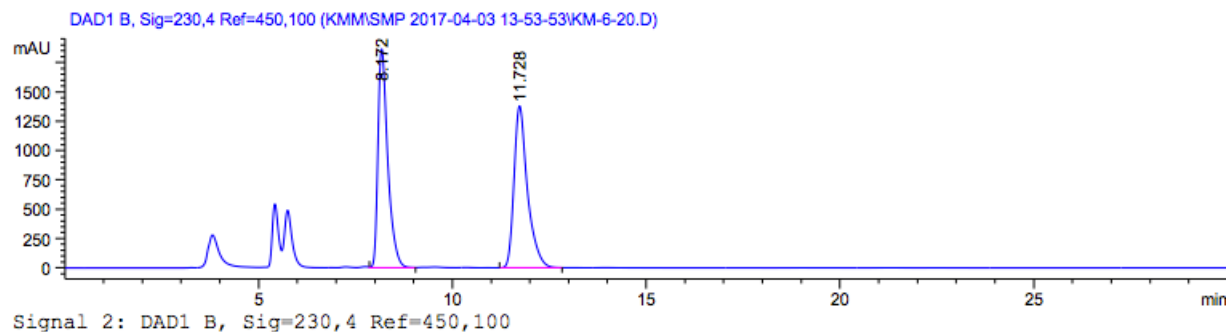

Enriched sample:

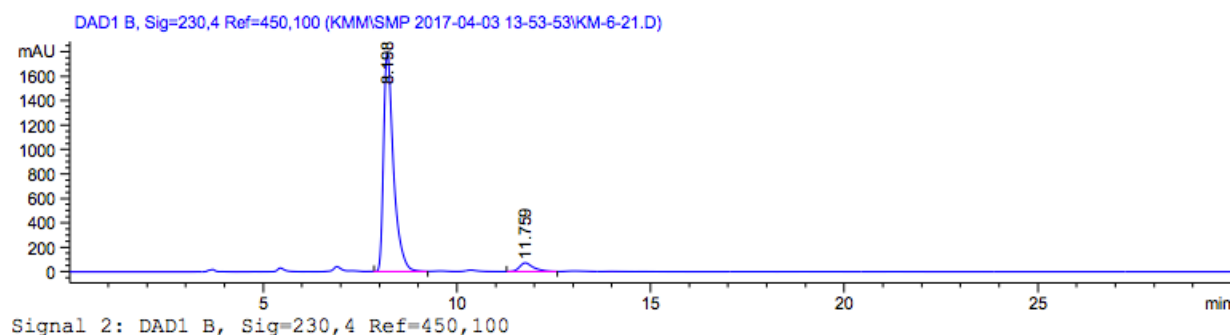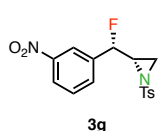

Prepared according to the general procedure using **2g** (173 mg, 0.52 mmol). After work-up, the crude residue was purified by silica gel column chromatography (dichloromethane) to give **3g** (144 mg, 79%) as a white solid in 91% ee. <sup>1</sup>H NMR (500 MHz, CDCl<sub>3</sub>): δ 8.12 (ddd, *J* = 8.2, 2.3, 1.1 Hz, 1H), 8.04 (t, *J* = 0.7 Hz, 1H), 7.64 (d, *J* = 8.4 Hz, 2H), 7.57 (ddd, *J* = 7.8, 1.8, 1.0 Hz, 1H), 7.51–7.43 (m, 1H), 7.18 (dd, *J* = 8.7, 0.7 Hz, 2H), 5.51 (dd, *J* = 45.5, 4.2 Hz, 1H), 3.13 (ddt, *J* = 16.5, 7.1, 4.2 Hz, 1H), 2.84 (dd, *J* = 7.1, 1.8 Hz, 1H), 2.51 (d, *J* = 4.3 Hz, 1H), 2.41 (s, 3H); <sup>13</sup>C NMR (125.7 MHz, CDCl<sub>3</sub>): δ 148.1, 145.0, 138.3 (d, *J* = 22.3 Hz), 134.1, 131.6 (d, *J* = 6.8 Hz), 129.7, 129.6, 127.9, 123.6, 120.9 (d, *J* = 7.7 Hz), 88.7 (d, *J* = 182.2 Hz), 42.5 (d, *J* = 25.4 Hz), 29.5 (d, *J* = 7.2 Hz), 21.6; <sup>19</sup>F NMR (470.4 MHz, CDCl<sub>3</sub>): δ -189.8 (dd, *J* = 45.5, 16.7 Hz); FTIR (thin film) ν 3093 (w), 1569 (w), 1530 (s), 1159 (s), 915 (s), 725 (s), 537 (m) cm<sup>-1</sup>; HRMS (ESI-TOF) Calc'd for C<sub>16</sub>H<sub>15</sub>FN<sub>2</sub>O<sub>4</sub>S [M+H]<sup>+</sup>: 351.0809; found 351.0808; [α]<sub>D</sub><sup>25</sup> = -20.1° (c 1.0, CH<sub>3</sub>CN).



91% ee, Chiral HPLC (AD-H, 40% isopropanol in hexanes, 1.0 mL/min,  $\lambda = 230$  nm);  $t_R(\text{major}) = 8.7$  min,  $t_R(\text{minor}) = 12.2$  min.

Racemic sample:

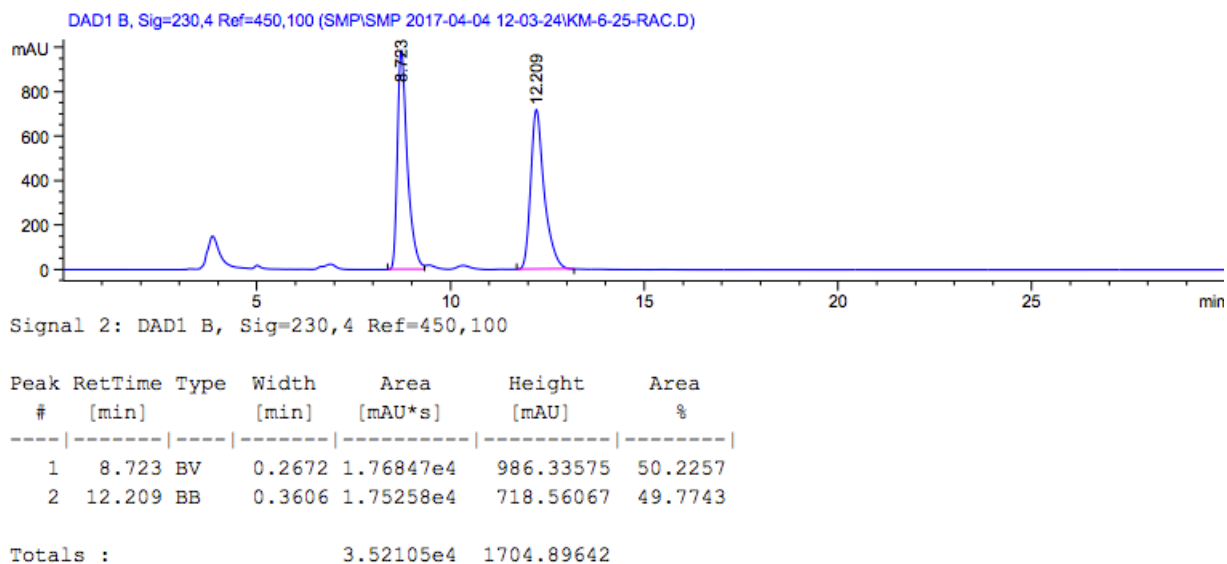

Enriched sample:

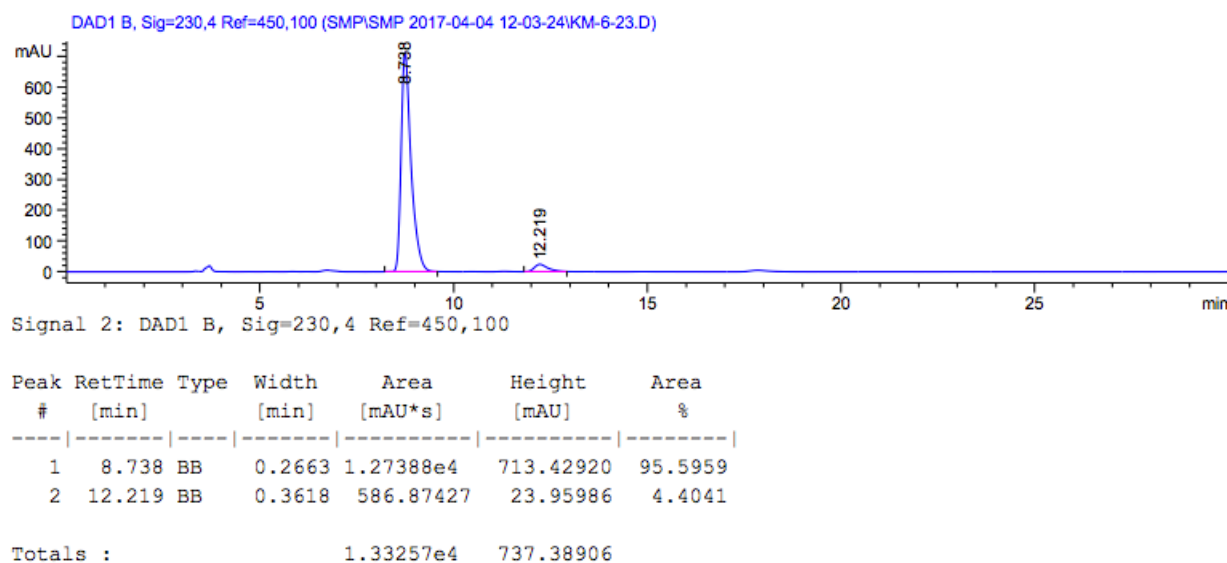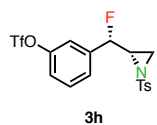

Prepared according to the general procedure using **2h** (226 mg, 0.52 mmol). After work-up, the crude residue was purified by silica gel column chromatography (10 to 50% diethyl ether in hexanes) to give **3h** (189 mg, 80%) as a white solid in 94% ee.  $^1\text{H}$  NMR (500 MHz,  $\text{CDCl}_3$ ):  $\delta$  7.73–7.67 (m, 2H), 7.35 (t,  $J = 8.0$  Hz, 1H), 7.26 (d,  $J = 8.2$  Hz, 2H), 7.20 (d,  $J = 8.2$  Hz, 1H), 7.16 (s, 1H), 5.38 (dd,  $J = 45.6, 4.7$  Hz, 1H), 3.13 (ddt,  $J = 15.0, 7.3, 4.5$  Hz, 1H), 2.79 (dd,  $J = 7.1, 1.9$  Hz, 1H), 2.48 – 2.36 (m, 4H);  $^{13}\text{C}$  NMR (125.7 MHz,  $\text{CDCl}_3$ ):  $\delta$  149.5, 145.0, 139.1 (d,  $J = 21.9$  Hz), 134.2, 130.6, 129.8, 128.0, 125.64 (d,  $J = 6.7$  Hz), 121.7, 118.8 (d,  $J = 7.9$  Hz), 118.7 (q,  $J = 320.5$  Hz), 89.5 (d,  $J = 181.6$  Hz), 42.3 (d,  $J = 26.5$  Hz), 29.5 (d,  $J = 6.8$  Hz), 21.6;  $^{19}\text{F}$  NMR (470.4 MHz,  $\text{CDCl}_3$ ):  $\delta$  -73.0, -187.3 (dd,  $J = 45.7, 14.8$  Hz); FTIR (thin film)  $\nu$  1616 (w), 1421 (s), 1209 (s),

713 (s), 474 (m)  $\text{cm}^{-1}$ ; HRMS (ESI-TOF) Calc'd for  $\text{C}_{17}\text{H}_{15}\text{F}_4\text{NO}_5\text{S}_2$   $[\text{M}+\text{H}]^+$ : 454.0401; found 454.0394.  $[\alpha]_{\text{D}}^{24} = -3.1^\circ$  (c 1.0,  $\text{CHCl}_3$ ).

94% ee, Chiral HPLC (OJ-H, 30% isopropanol in hexanes, 1.0 mL/min,  $\lambda = 254$  nm);  $t_{\text{R}}(\text{major}) = 12.3$  min,  $t_{\text{R}}(\text{minor}) = 21.8$  min.

Racemic sample:

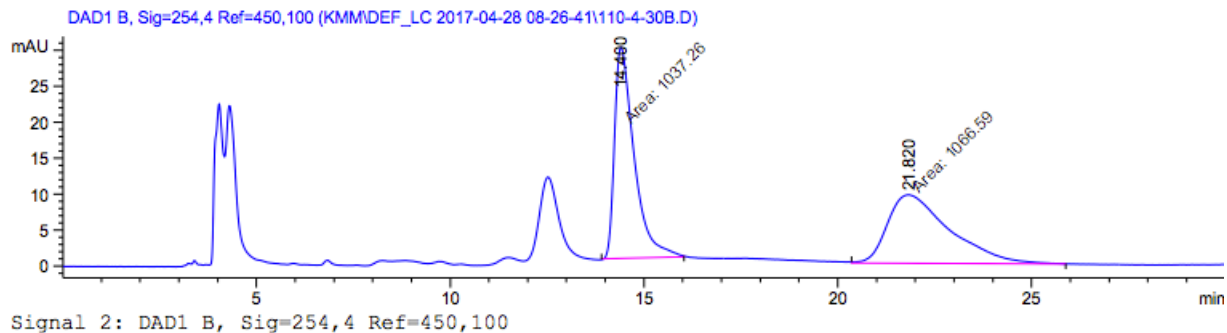

Enriched sample:

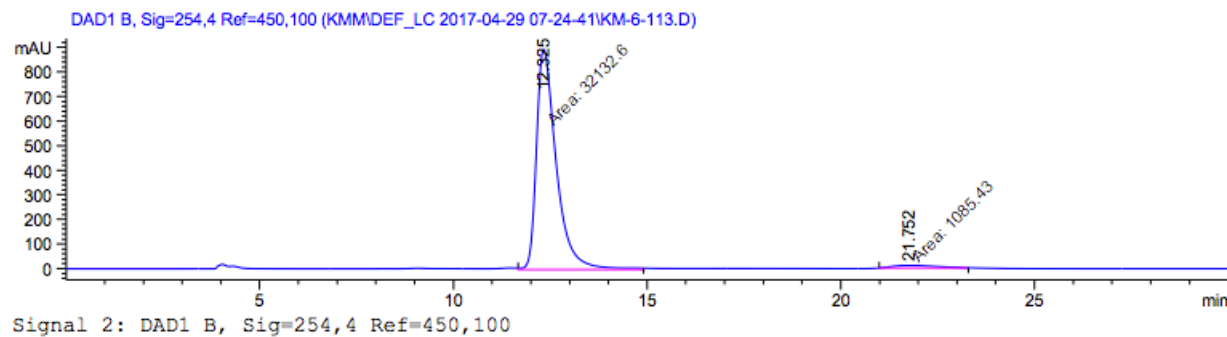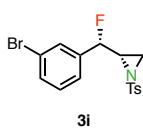

Prepared according to the general procedure using **2i** (190 mg, 0.52 mmol). After work-up, the crude residue was purified by silica gel column chromatography (0 to 25% diethyl ether in hexanes) to give **3i** (112 mg, 56%) as a colorless oil in 90% ee.  $^1\text{H}$  NMR (500 MHz,  $\text{CDCl}_3$ ):  $\delta$  7.76–7.67 (m, 2H), 7.45–7.39 (m, 1H), 7.37 (s, 1H), 7.27 (d,  $J = 8.1$  Hz, 2H), 7.21–7.12 (m, 2H), 5.25 (dd,  $J = 45.8, 5.0$  Hz, 1H), 3.12 (ddt,  $J = 14.2, 6.9, 4.6$  Hz, 1H),

2.81 (dd,  $J = 7.2, 2.1$  Hz, 1H), 2.53–2.37 (m, 4H);  $^{13}\text{C}$  NMR (125.7 MHz,  $\text{CDCl}_3$ ):  $\delta$  144.9, 138.3 (d,  $J = 21.6$  Hz), 134.3, 132.0, 130.2, 129.8, 128.9 (d,  $J = 7.3$  Hz), 128.0, 124.3 (d,  $J = 6.7$  Hz), 122.8, 90.1 (d,  $J = 181.2$  Hz), 42.7 (d,  $J = 26.8$  Hz), 29.6 (d,  $J = 7.2$  Hz), 21.8;  $^{19}\text{F}$  NMR (470.4 MHz,  $\text{CDCl}_3$ ):  $\delta$  -185.6 (dd,  $J = 45.8, 14.4$  Hz); FTIR (thin film)  $\nu$  2924 (w), 1597 (w), 1324 (m), 1159 (s), 724 (m), 600 (m)  $\text{cm}^{-1}$ ; HRMS (ESI-TOF) Calc'd for  $\text{C}_{16}\text{H}_{15}\text{BrFNO}_2\text{S}$   $[\text{M}+\text{H}]^+$ : 384.0064; found 384.0060;  $[\alpha]_{\text{D}}^{25} = +0.9^\circ$  (c 1.0,  $\text{CH}_3\text{CN}$ ).

90% ee, Chiral HPLC (OJ-H, 30% isopropanol in hexanes, 1.0 mL/min,  $\lambda = 230$  nm);  $t_{\text{R}}$ (minor) = 17.6 min,  $t_{\text{R}}$ (major) = 26.8 min.

Racemic sample:

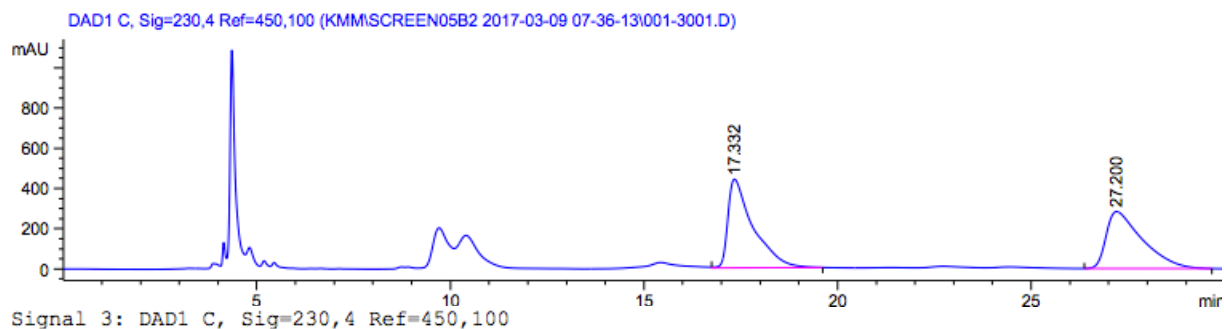

Enriched sample:

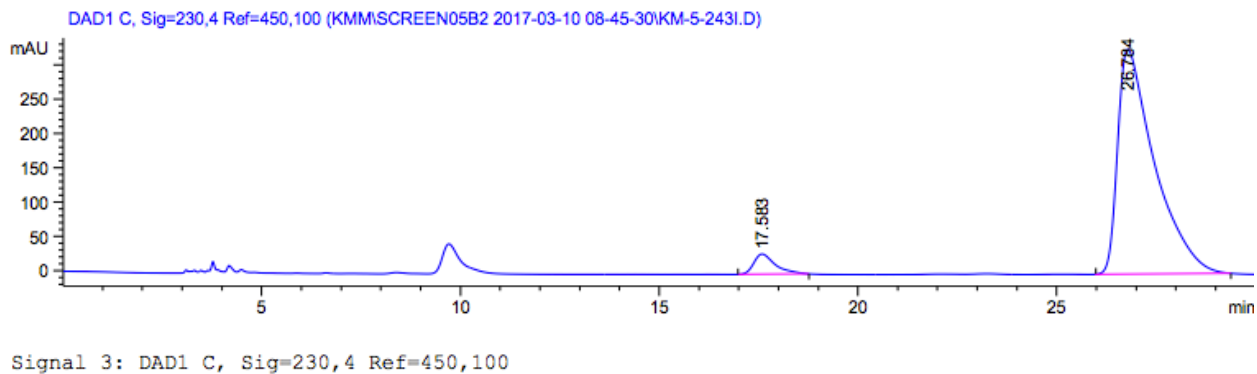

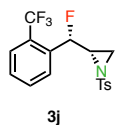

Prepared according to the general procedure using **2j** (185 mg, 0.52 mmol). After work-up, the crude residue was purified by silica gel column chromatography (0 to 15% diethyl ether in hexanes) to give **3j** (161 mg, 83%) as a colorless oil in 80% ee.  $^1\text{H}$  NMR (500 MHz,  $\text{CDCl}_3$ ):  $\delta$  7.63 (d,  $J = 8.3$  Hz, 2H), 7.55 (dd,  $J = 7.5, 1.7$  Hz, 1H), 7.51 (dd,  $J = 7.2, 1.9$  Hz, 1H), 7.39–7.30 (m, 2H), 7.20–7.14 (m, 2H), 5.86–5.67 (m, 1H), 3.14 (ddt,  $J = 17.3, 7.3, 4.2$  Hz, 1H), 2.79 (dd,  $J = 7.2, 1.9$  Hz, 1H), 2.54 (d,  $J = 4.4$  Hz, 1H), 2.38 (s, 3H);  $^{13}\text{C}$  NMR (125.7 MHz,  $\text{CDCl}_3$ ):  $\delta$  144.7, 134.8 (d,  $J = 22.5$  Hz), 134.3, 132.3, 129.7, 128.8 (d,  $J = 1.9$  Hz), 128.5 (d,  $J = 8.7$  Hz), 128.0, 125.4 (q,  $J = 5.7$  Hz), 124.0 (q,  $J = 273.6$  Hz), 85.7 (dd,  $J = 178.4, 2.6$  Hz), 42.7 (d,  $J = 25.4$  Hz), 29.8 (d,  $J = 7.2$  Hz), 21.6;  $^{19}\text{F}$  NMR (470.4 MHz,  $\text{CDCl}_3$ ):  $\delta$  -57.93 (s, 3F), -185.14 (dd,  $J = 44.9, 17.3$  Hz, 1F); FTIR (thin film)  $\nu$  1597 (w), 1312 (s), 1159 (s), 941 (m), 716 (s), 563 (m)  $\text{cm}^{-1}$ ; HRMS (ESI-TOF) Calc'd for  $\text{C}_{17}\text{H}_{15}\text{F}_4\text{NO}_5\text{S}_2$   $[\text{M}+\text{H}]^+$ : 374.0832; found 374.0826.  $[\alpha]_{\text{D}}^{23} = +6.8^\circ$  (c 1.0,  $\text{CHCl}_3$ ).

80% ee, Chiral HPLC (OJ-H, 30% isopropanol in hexanes, 1.0 mL/min,  $\lambda = 230$  nm);  $t_{\text{R}}$ (minor) = 8.0 min,  $t_{\text{R}}$ (major) = 9.6 min.

Racemic sample:

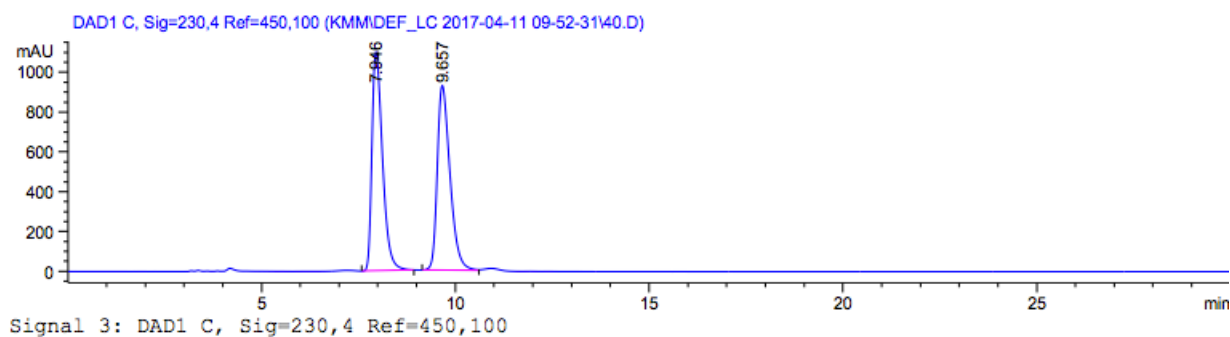

| Peak # | RetTime [min] | Type | Width [min] | Area [mAU*s] | Height [mAU] | Area %  |
|--------|---------------|------|-------------|--------------|--------------|---------|
| 1      | 7.946         | VB   | 0.2909      | 2.08105e4    | 1099.03418   | 49.4876 |
| 2      | 9.657         | BV   | 0.3490      | 2.12415e4    | 928.29474    | 50.5124 |

Totals : 4.20520e4 2027.32892

Enriched sample:

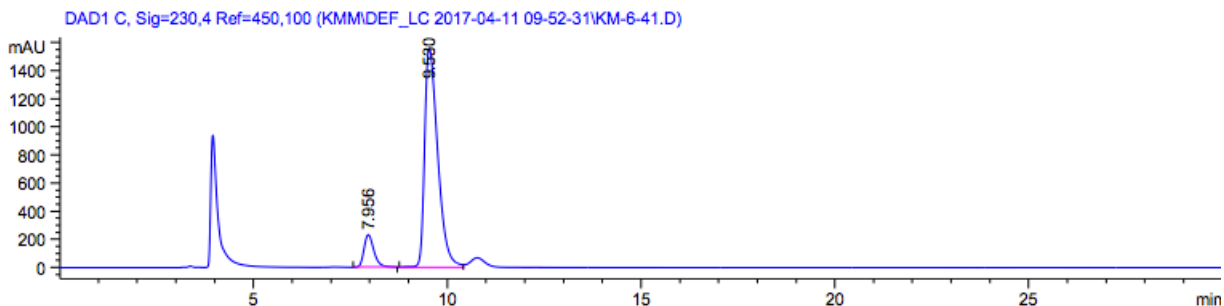

Signal 3: DAD1 C, Sig=230,4 Ref=450,100

| Peak # | RetTime [min] | Type | Width [min] | Area [mAU*s] | Height [mAU] | Area %  |
|--------|---------------|------|-------------|--------------|--------------|---------|
| 1      | 7.956         | VB   | 0.2766      | 4179.44287   | 231.53537    | 10.2289 |
| 2      | 9.530         | BV   | 0.3606      | 3.66799e4    | 1558.64014   | 89.7711 |

Totals : 4.08593e4 1790.17551

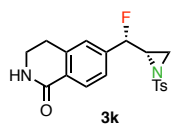

Prepared according to the general procedure using **2k** (185 mg, 0.52 mmol). After work-up, the crude residue was purified by silica gel column chromatography (20 to 100% ethyl acetate in hexanes) to give **3k** (150 mg, 77%) as a white solid in 94% ee. <sup>1</sup>H NMR (500 MHz, CDCl<sub>3</sub>): δ 7.91 (d, *J* = 8.0 Hz, 1H), 7.67 (dd, *J* = 8.3, 1.6 Hz, 2H), 7.45 (s, 1H), 7.21 (d, *J* = 7.7 Hz, 2H), 7.16 (d, *J* = 8.1 Hz, 1H), 7.10 (s, 1H), 5.29 (dd, *J* = 46.1, 5.0 Hz, 1H), 3.52 (dt, *J* = 7.3, 3.6 Hz, 2H), 3.19–3.08 (m, 1H), 2.87 (t, *J* = 6.9 Hz, 2H), 2.77 (dd, *J* = 7.2, 2.3 Hz, 1H), 2.46–2.32 (m, 4H); <sup>13</sup>C NMR (125.7 MHz, CDCl<sub>3</sub>): δ 166.0, 144.9, 140.0 (d, *J* = 21.0 Hz), 139.3, 134.2, 129.6, 129.5, 128.1, 127.9, 124.3 (dd, *J* = 38.4, 6.9 Hz), 90.5 (d, *J* = 180.6 Hz), 42.7 (d, *J* = 26.7 Hz), 39.9, 29.5 (d, *J* = 7.4 Hz), 28.1, 21.6; <sup>19</sup>F NMR (470.4 MHz, CDCl<sub>3</sub>): δ -186.0 (dd, *J* = 46.3, 14.2 Hz); FTIR (thin film) ν 3207 (br. s), 1665 (s), 1323 (s), 1159 (s), 908 (s), 710 (s) cm<sup>-1</sup>; HRMS (ESI-TOF) Calc'd for C<sub>19</sub>H<sub>19</sub>FN<sub>2</sub>O<sub>3</sub>S [M+H]<sup>+</sup>: 375.1173; found 375.1177; [α]<sub>D</sub><sup>25</sup> = +1.3° (c 1.0, CH<sub>3</sub>CN).

94% ee, Chiral HPLC (AD-H, 40% isopropanol in hexanes, 1.0 mL/min, λ = 230 nm); t<sub>R</sub>(major) = 11.3 min, t<sub>R</sub>(minor) = 13.0 min.

Racemic sample:

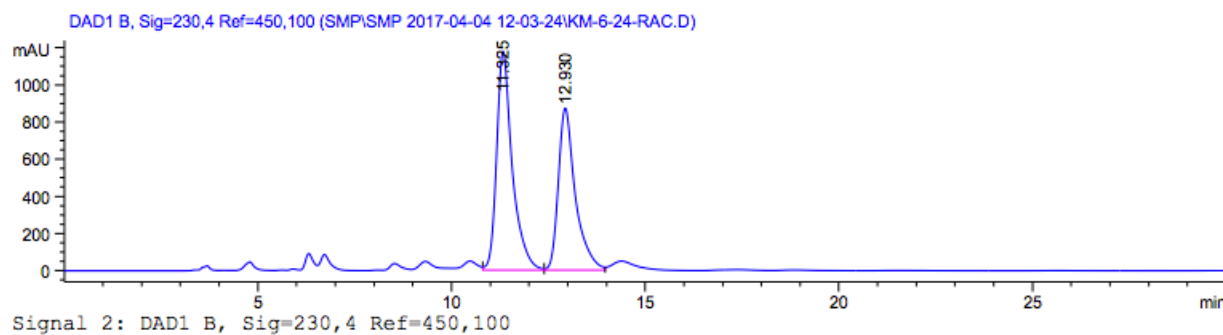

| Peak # | RetTime [min] | Type | Width [min] | Area [mAU*s] | Height [mAU] | Area %  |
|--------|---------------|------|-------------|--------------|--------------|---------|
| 1      | 11.325        | VV   | 0.4126      | 3.32390e4    | 1180.19873   | 55.3532 |
| 2      | 12.930        | VV   | 0.4499      | 2.68099e4    | 873.84082    | 44.6468 |

Totals : 6.00490e4 2054.03955

Enriched sample:

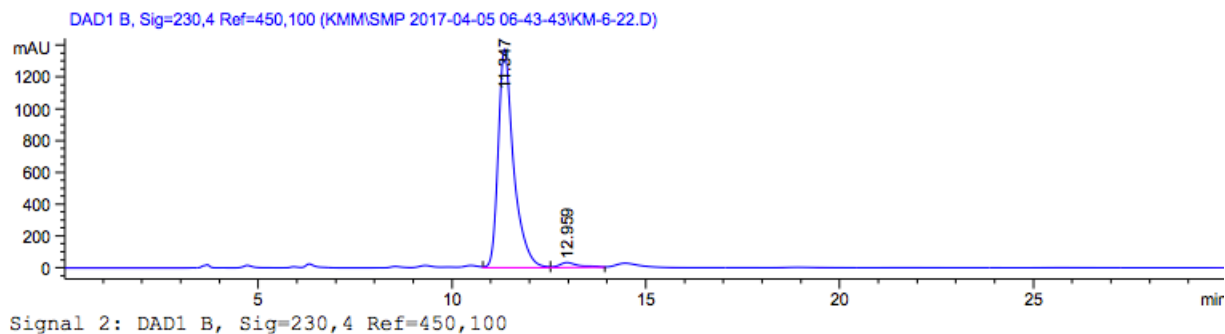

| Peak # | RetTime [min] | Type | Width [min] | Area [mAU*s] | Height [mAU] | Area %  |
|--------|---------------|------|-------------|--------------|--------------|---------|
| 1      | 11.347        | VV   | 0.4088      | 3.80237e4    | 1374.08093   | 96.8467 |
| 2      | 12.959        | VV   | 0.5457      | 1238.01978   | 32.25899     | 3.1533  |

Totals : 3.92617e4 1406.33992

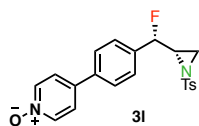

Prepared according to the general procedure using **21** (98.9 mg, 0.26 mmol). After work-up, the crude residue was purified by silica gel column chromatography (0 to 10% methanol in dichloromethane) to give **31** (74.6 mg, 72%) as a yellow solid in 90% ee. <sup>1</sup>H NMR (500 MHz, CDCl<sub>3</sub>): δ 8.28 (d, *J* = 7.2 Hz, 2H), 7.76 (d, *J* = 8.3 Hz, 2H), 7.57–7.47 (m, 4H), 7.40 (d, *J* = 8.0 Hz, 2H), 7.32–7.24 (m, 2H), 5.32 (dd, *J* = 46.0, 5.4 Hz, 1H), 3.21 (dddd, *J* = 12.9, 7.1, 5.5, 4.4 Hz, 1H), 2.77 (dd, *J* = 7.1, 2.2 Hz, 1H), 2.41 (d, *J* = 4.3 Hz, 1H), 2.36 (s, 3H); <sup>13</sup>C NMR (125.7 MHz, CDCl<sub>3</sub>): δ 144.9, 139.5, 137.8, 137.0 (d, *J* = 21.3 Hz), 136.9, 134.5, 129.7, 128.1, 127.0 (d, *J* = 6.5 Hz), 126.6, 123.7, 90.9 (d, *J* = 179.8 Hz), 42.5 (d, *J* = 27.6 Hz), 29.8 (d, *J* = 6.9 Hz), 21.7; <sup>19</sup>F NMR (470.4 MHz, CDCl<sub>3</sub>): δ -183.29 (dd, *J* = 46.0, 13.2 Hz); FTIR (thin film) ν 3379 (br. s), 1597 (w), 1478 (m), 1243 (m), 1160 (s), 728 (m) cm<sup>-1</sup>; HRMS (ESI-TOF) Calc'd for C<sub>21</sub>H<sub>19</sub>FN<sub>2</sub>O<sub>3</sub>S [M+H]<sup>+</sup>: 399.1173; found 399.1166. [α]<sub>D</sub><sup>23</sup> = +51.9° (c 1.0, CHCl<sub>3</sub>).

90% ee, Chiral HPLC (OJ-H, 50% isopropanol in hexanes, 1.0 mL/min, λ = 230 nm); t<sub>R</sub>(minor) = 21.9 min, t<sub>R</sub>(major) = 23.9 min.

Racemic sample:

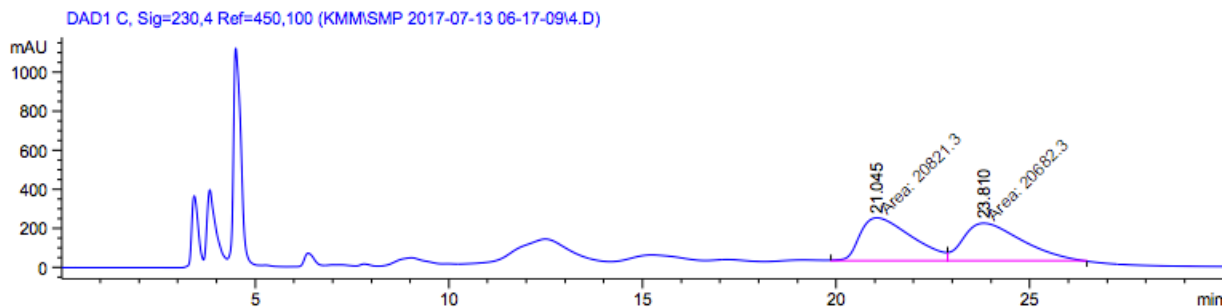

Signal 3: DAD1 C, Sig=230,4 Ref=450,100

| Peak # | RetTime [min] | Type | Width [min] | Area [mAU*s] | Height [mAU] | Area %  |
|--------|---------------|------|-------------|--------------|--------------|---------|
| 1      | 21.045        | MM   | 1.5611      | 2.08213e4    | 222.28683    | 50.1675 |
| 2      | 23.810        | MM   | 1.7709      | 2.06823e4    | 194.65215    | 49.8325 |

Totals : 4.15036e4 416.93898

Enriched sample:

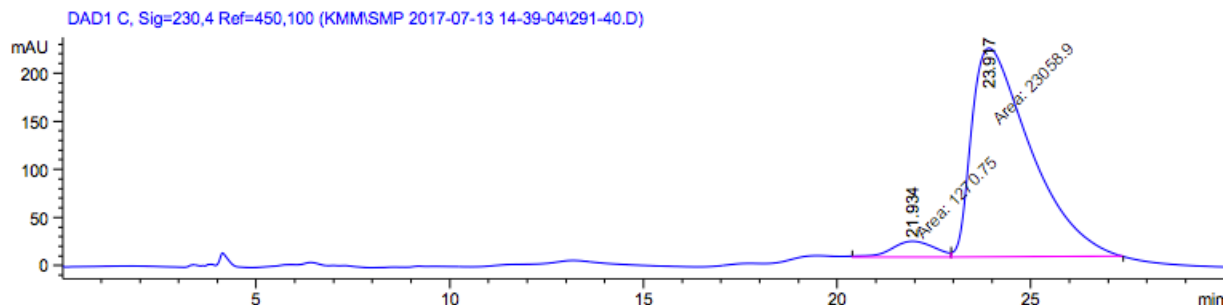

Signal 3: DAD1 C, Sig=230,4 Ref=450,100

| Peak # | RetTime [min] | Type | Width [min] | Area [mAU*s] | Height [mAU] | Area %  |
|--------|---------------|------|-------------|--------------|--------------|---------|
| 1      | 21.934        | MM   | 1.2837      | 1270.75439   | 16.49884     | 5.2231  |
| 2      | 23.917        | MM   | 1.7708      | 2.30589e4    | 217.02835    | 94.7769 |

Totals : 2.43297e4 233.52719

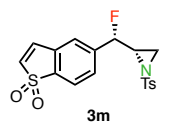

Prepared according to the general procedure using **2m** (195 mg, 0.52 mmol). After work-up, the crude residue was purified by silica gel column chromatography (10 to 100% diethyl ether in hexanes) to give **3m** (158 mg, 77%) as a white solid in 97% ee. <sup>1</sup>H NMR (500 MHz, DMSO-*d*<sub>6</sub>): δ 7.76 (d, *J* = 7.8 Hz, 1H), 7.61 (d, *J* = 8.3 Hz, 2H), 7.56–7.48 (m, 2H), 7.45–7.37 (m, 2H), 7.32–7.24 (m, 2H), 5.67 (dd, *J* = 45.8, 4.7 Hz, 1H), 3.33–3.26 (m, 1H), 2.77 (dd, *J* = 7.3, 2.1 Hz, 1H), 2.64 (d, *J* = 4.3 Hz, 1H), 2.36 (d, *J* = 1.9 Hz, 3H); <sup>13</sup>C NMR (125.7 MHz, DMSO-*d*<sub>6</sub>): δ 144.8, 142.5 (d, *J* = 21.2 Hz), 136.3, 133.7, 132.5, 131.5 (d, *J* = 3.8 Hz), 129.7, 128.2 (d, *J* = 7.4 Hz), 127.6, 123.0 (d, *J* = 7.2 Hz), 121.0, 89.1 (d, *J* = 178.2 Hz), 42.5 (d, *J* = 23.9 Hz), 29.2 (d, *J* = 7.9 Hz), 21.1; <sup>19</sup>F NMR (470.4 MHz, DMSO-*d*<sub>6</sub>): δ -188.86 (dd, *J* = 45.7, 16.7 Hz); FTIR (thin film) ν 1298 (s), 1158 (s), 914 (m), 726 (m) cm<sup>-1</sup>; HRMS (ESI-TOF) Calc'd for C<sub>18</sub>H<sub>16</sub>FNO<sub>4</sub>S<sub>2</sub> [M+H]<sup>+</sup>: 394.0578; found 394.0573. [α]<sub>D</sub><sup>24</sup> = -0.97° (c 1.0, CH<sub>2</sub>Cl<sub>2</sub>).

97% ee, Chiral HPLC (AD-H, 40% isopropanol in hexanes, 1.0 mL/min, λ = 210 nm); t<sub>R</sub>(major) = 16.5 min, t<sub>R</sub>(minor) = 21.0 min.

Racemic sample:

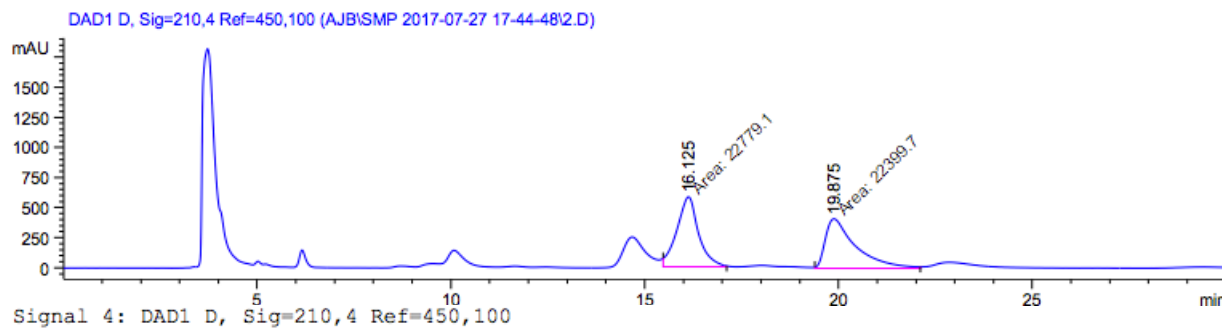

| Peak # | RetTime [min] | Type | Width [min] | Area [mAU*s] | Height [mAU] | Area %  |
|--------|---------------|------|-------------|--------------|--------------|---------|
| 1      | 16.125        | MM   | 0.6514      | 2.27791e4    | 582.78949    | 50.4199 |
| 2      | 19.875        | MM   | 0.9080      | 2.23997e4    | 411.14539    | 49.5801 |

Totals : 4.51788e4 993.93488

Enriched sample:

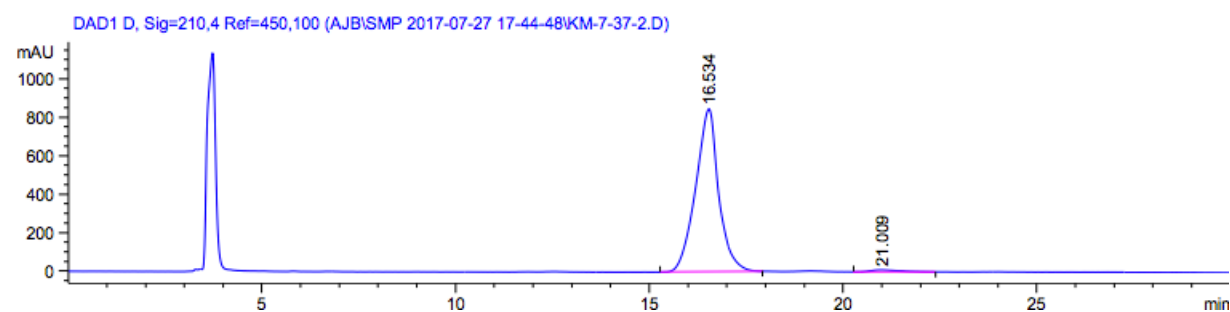

| Peak # | RetTime [min] | Type | Width [min] | Area [mAU*s] | Height [mAU] | Area %  |
|--------|---------------|------|-------------|--------------|--------------|---------|
| 1      | 16.534        | VB   | 0.5802      | 3.50054e4    | 846.99823    | 98.4646 |
| 2      | 21.009        | BV   | 0.6358      | 545.83673    | 10.17539     | 1.5354  |

Totals : 3.55513e4 857.17362

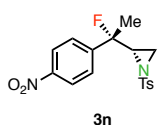

Prepared according to the general procedure using **2n** (180 mg, 0.52 mmol). After work-up, the crude residue was purified by silica gel column chromatography (dichloromethane) to give **3n** (83.4 mg, 44%) as a white solid in 61% ee. <sup>1</sup>H NMR (500 MHz, CDCl<sub>3</sub>): δ 7.98 (d, *J* = 8.6 Hz, 2H), 7.55 (d, *J* = 8.3 Hz, 2H), 7.33 (d, *J* = 8.9 Hz, 2H), 7.14 (d, *J* = 8.1 Hz, 2H), 3.05 (ddd, *J* = 16.2, 7.0, 4.2 Hz, 1H), 2.80 (dd, *J* = 7.0, 1.1 Hz, 1H), 2.43 (d, *J* = 4.2 Hz, 1H), 2.36 (s, 3H), 1.71 (d, *J* = 22.4 Hz, 3H); <sup>13</sup>C NMR (125.7 MHz, CDCl<sub>3</sub>): δ 147.9, 147.6 (d, *J* = 29.9 Hz), 145.2, 134.3, 129.6, 128.0, 125.5 (d, *J* = 9.6 Hz), 123.4 (d, *J* = 1.8 Hz), 92.7 (d, *J* = 181.2 Hz), 46.0 (d, *J* = 26.9 Hz), 29.6 (d, *J* = 6.5 Hz), 24.5 (d, *J* = 24.1 Hz), 21.6; <sup>19</sup>F NMR (470.4 MHz, CDCl<sub>3</sub>): δ -159.6 (dd, *J* = 22.4, 16.2 Hz); FTIR (thin film) ν 3084 (w), 1598 (w), 1522 (m), 1409 (m), 1161 (s), 733 (m) cm<sup>-1</sup>; HRMS (ESI-TOF) Calc'd for C<sub>17</sub>H<sub>17</sub>FN<sub>2</sub>O<sub>4</sub>S [M+H]<sup>+</sup>: 365.0966; found 365.0960. [α]<sub>D</sub><sup>24</sup> = -2.3° (c 1.0, CHCl<sub>3</sub>).



61% ee, Chiral HPLC (OD-H, 30% isopropanol in hexanes, 1.0 mL/min,  $\lambda = 300$  nm);  $t_R(\text{major}) = 11.9$  min,  $t_R(\text{minor}) = 15.7$  min.

Racemic sample:

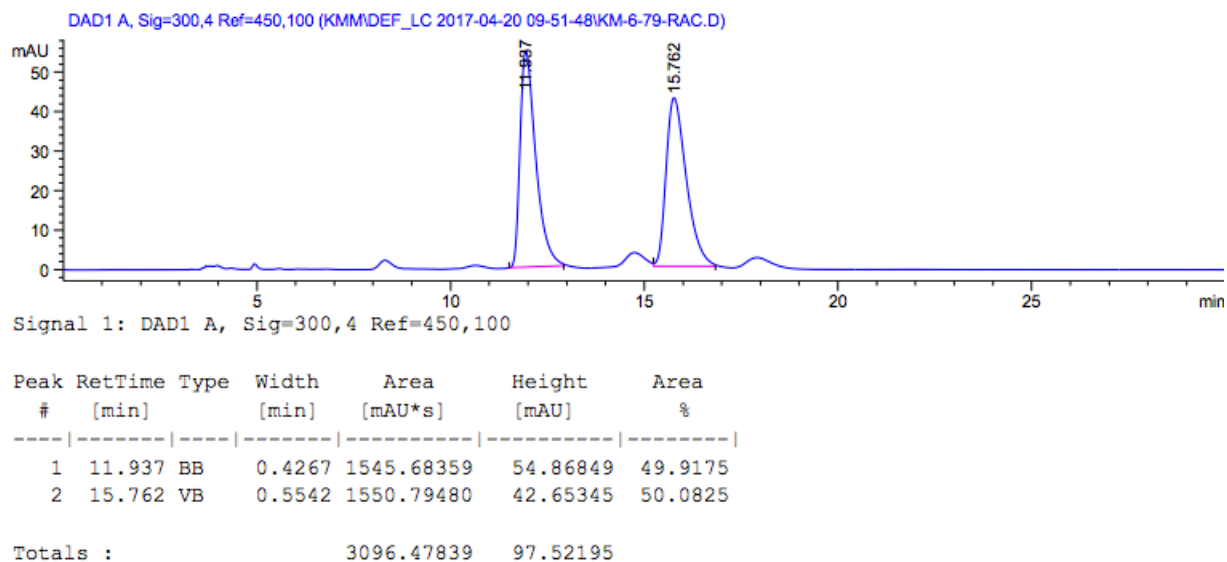

Enriched sample:

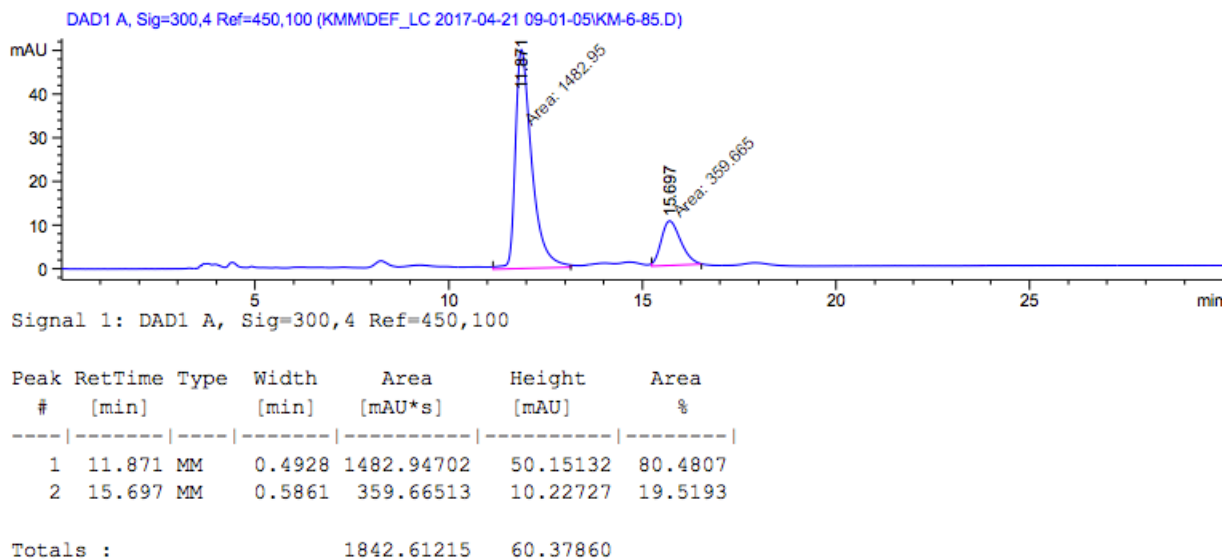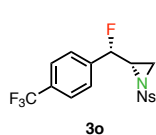

Prepared according to the general procedure using **2o** (402 mg, 1.04 mmol). After work-up, the crude residue was purified by silica gel column chromatography (dichloromethane) to give **3o** (235 mg, 56%) as a white solid in 94% ee.  $^1\text{H}$  NMR (600 MHz,  $\text{CDCl}_3$ ):  $\delta$  8.31 (d,  $J = 8.9$  Hz, 2H), 8.03 (d,  $J = 8.8$  Hz, 2H), 7.61–7.50 (m, 2H), 7.44–7.35 (m, 2H), 5.38 (dd,  $J = 45.9, 5.1$  Hz, 1H), 3.27 (dddd,  $J = 14.3, 7.2, 5.1, 4.4$  Hz, 1H), 2.94 (ddd,  $J = 7.2, 2.2, 0.6$  Hz, 1H), 2.57 (d,  $J = 4.5$  Hz, 1H);  $^{13}\text{C}$  NMR (125.7 MHz,  $\text{CDCl}_3$ ):  $\delta$  150.90, 143.28, 139.74 (d,  $J = 21.5$  Hz), 131.0 (q,  $J = 32.1$  Hz), 129.4, 126.0 (d,  $J = 7.1$  Hz), 125.8 (q,  $J = 3.8$  Hz), 124.3, 124.0 (q,  $J = 273.6$  Hz), 90.1 (d,  $J = 181.7$  Hz), 43.6 (d,  $J = 26.4$  Hz), 30.3 (d,  $J = 7.6$  Hz);  $^{19}\text{F}$  NMR (470.4 MHz,

CDCl<sub>3</sub>):  $\delta$  -62.86, -187.28 (dd,  $J$  = 45.8, 14.4 Hz); HRMS (ESI-TOF) Calc'd for C<sub>16</sub>H<sub>12</sub>F<sub>4</sub>N<sub>2</sub>O<sub>4</sub>S [M+H]<sup>+</sup>: 405.0527; found 405.0532;  $[\alpha]_D^{24}$  = +10.1° (c 1.0, CH<sub>3</sub>CN).

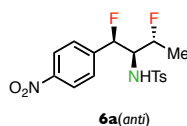

Prepared according to the general procedure using **5a** (180 mg, 0.52 mmol) with the following modification: 25 equiv hydrogen fluoride and 20 mol% of catalyst *ent-1a*<sup>10</sup> (enantiomer of catalyst **1a**, 80 mg) were used instead. The diastereomeric ratio (d.r.) of the crude residue was determined to be >20:1 by <sup>19</sup>F NMR. The crude residue was purified by silica gel column chromatography (10 to 40% diethyl ether in hexanes) to give **6a(anti)** (156 mg, 78%) as a white solid in >20:1 d.r. Crystals of **6a(anti)** were grown by vapor diffusion of pentane into a solution of the compound in ethyl acetate. <sup>1</sup>H NMR (500 MHz, CDCl<sub>3</sub>):  $\delta$  7.82 (d,  $J$  = 8.7 Hz, 2H), 7.18 (t,  $J$  = 8.6 Hz, 4H), 6.91 (d,  $J$  = 8.0 Hz, 2H), 5.87 (d,  $J$  = 45.4 Hz, 1H), 4.77 (ddq,  $J$  = 47.0, 8.7, 6.3 Hz, 1H), 3.91–3.53 (m, 1H), 2.24 (s, 3H), 1.47 (dd,  $J$  = 25.1, 6.3 Hz, 3H); <sup>13</sup>C NMR (125.7 MHz, CDCl<sub>3</sub>):  $\delta$  147.4, 143.9 (d,  $J$  = 21.2 Hz), 143.3, 138.5, 129.3, 126.1, 125.9 (d,  $J$  = 9.1 Hz), 123.3 (d,  $J$  = 1.9 Hz), 90.1 (dd,  $J$  = 157.3, 3.9 Hz), 88.7 (dd,  $J$  = 151.6, 3.8 Hz), 62.3 (dd,  $J$  = 25.8, 19.2 Hz), 50.5–48.1 (m), 21.1, 18.1 (d,  $J$  = 21.7 Hz); <sup>19</sup>F NMR (470.4 MHz, CDCl<sub>3</sub>):  $\delta$  -177.7–178.1 (m), -203.4 (ddd,  $J$  = 45.5, 29.3, 5.0 Hz); FTIR (thin film)  $\nu$  3246 (br. w), 1605 (w), 1514 (s), 1161 (s), 478 (s) cm<sup>-1</sup>; HRMS (ESI-TOF) Calc'd for C<sub>17</sub>H<sub>18</sub>F<sub>2</sub>N<sub>2</sub>O<sub>4</sub>S [M+H]<sup>+</sup>: 385.1028; found 385.1022.  $[\alpha]_D^{24}$  = -21.5° (c 1.0, CHCl<sub>3</sub>).

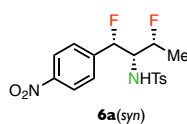

Prepared according to the general procedure using **5a** (180 mg, 0.52 mmol) with the following modification: 50 equiv hydrogen fluoride and 20 mol% of catalyst **1a** were used instead. The diastereomeric ratio (d.r.) of the crude residue was determined to be 13:1 by <sup>19</sup>F NMR. The crude residue was purified by silica gel column chromatography (10 to 40% diethyl ether in hexanes) to give **6a(syn)** (138 mg, 69%) as a white solid in >20:1 d.r. Crystals of **6a(syn)** were grown by vapor diffusion of pentane into a solution of the compound in ethyl acetate. <sup>1</sup>H NMR (500 MHz, CDCl<sub>3</sub>):  $\delta$  7.99 (d,  $J$  = 8.8 Hz, 2H), 7.46 (d,  $J$  = 8.3 Hz, 2H), 7.31 (d,  $J$  = 8.8 Hz, 2H), 7.08 (d,  $J$  = 7.9 Hz, 2H), 5.70 (dd,  $J$  = 45.8, 3.9 Hz, 1H), 4.77 (ddd,  $J$  = 46.2, 6.4, 3.4 Hz, 1H), 3.73 (dddd,  $J$  = 22.1, 18.2, 6.0, 2.6 Hz, 1H), 2.32 (s, 3H), 1.36 (dd,  $J$  = 24.6, 6.4 Hz, 3H); <sup>13</sup>C NMR (125.7 MHz, CDCl<sub>3</sub>):  $\delta$  147.8, 143.6, 143.5 (d,  $J$  = 21.1 Hz), 129.5, 126.6, 126.4 (d,  $J$  = 8.3 Hz), 123.5, 91.1 (dd,  $J$  = 181.1, 2.6 Hz), 89.2 (d,  $J$  = 173.0 Hz), 61.5–59.7 (m), 21.3, 17.0 (d,  $J$  = 22.2 Hz); <sup>19</sup>F NMR (470.4 MHz, CDCl<sub>3</sub>):  $\delta$  -182.4–183.0 (m), -192.7 (ddd,  $J$  = 45.6, 21.7, 3.9 Hz); FTIR (thin film)  $\nu$  3250 (br. w), 1608 (w), 1345 (s), 1160 (s), 815 (m) cm<sup>-1</sup>; HRMS (ESI-TOF) Calc'd for C<sub>17</sub>H<sub>18</sub>F<sub>2</sub>N<sub>2</sub>O<sub>4</sub>S [M+H]<sup>+</sup>: 385.1028; found 385.1022;  $[\alpha]_D^{25}$  = +40.4° (c 1.0, CH<sub>3</sub>OH).

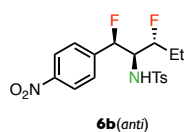

Prepared according to the general procedure using **5b** (187 mg, 0.52 mmol) with the following modification: 25 equiv hydrogen fluoride and 20 mol% of catalyst *ent-1a* (enantiomer of catalyst **1a**, 80 mg) were used instead. The diastereomeric ratio (d.r.) of the crude residue was determined to be >20:1 by <sup>19</sup>F NMR. The crude residue was purified by silica gel column chromatography (10 to 40% diethyl ether in hexanes) to give **6b(anti)** (176 mg, 85%) as a white solid in >20:1 d.r. <sup>1</sup>H NMR (500 MHz, 10% CD<sub>3</sub>OD/CDCl<sub>3</sub>):  $\delta$  7.77 (d,  $J$  = 8.3 Hz, 2H), 7.15 (d,  $J$  = 8.7 Hz, 2H), 7.13 (d,  $J$  = 7.9 Hz, 2H), 6.88 (d,  $J$  = 7.9 Hz, 2H), 5.84 (d,  $J$  = 45.3 Hz, 1H), 4.48 (dtd,  $J$  = 47.6, 8.9, 2.7 Hz, 1H), 3.72 (dt,  $J$  = 29.4, 8.0 Hz, 1H), 2.21 (s, 3H), 2.02–1.80 (m, 1H), 1.75–1.58 (m, 1H), 0.99 (t,  $J$  = 7.3 Hz, 3H); <sup>13</sup>C NMR (125.7 MHz, 10% CD<sub>3</sub>OD/CDCl<sub>3</sub>):  $\delta$  147.3, 144.0 (d,  $J$  = 21.1 Hz), 143.2, 138.5, 129.2, 126.0, 125.8 (d,  $J$  = 9.1 Hz), 123.2 (d,  $J$  = 1.7 Hz), 93.2 (dd,  $J$  = 176.7, 3.2 Hz), 90.1 (dd,  $J$  = 179.3, 4.7 Hz), 60.9 (dd,  $J$  = 25.7, 19.4 Hz), 24.8 (d,  $J$  = 20.6 Hz), 21.0, 9.2 (d,  $J$  = 4.3 Hz); <sup>19</sup>F NMR (470.4 MHz, CDCl<sub>3</sub>):  $\delta$  -188.84 (dddt,  $J$  = 45.4, 37.0, 17.2, 7.5 Hz), -204.14 (ddd,  $J$  = 45.4, 28.6, 6.9 Hz); FTIR (thin film)  $\nu$  2961 (br. w), 1521 (s), 1158 (s), 543 (m) cm<sup>-1</sup>; HRMS (ESI-TOF) Calc'd for C<sub>18</sub>H<sub>20</sub>F<sub>2</sub>N<sub>2</sub>O<sub>4</sub>S [M+H]<sup>+</sup>: 399.1185; found 399.1196;  $[\alpha]_D^{24}$  = -22.6° (c 1.0, CH<sub>3</sub>CN).

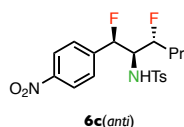

Prepared according to the general procedure using **5c** (195 mg, 0.52 mmol) with the following modification: 25 equiv hydrogen fluoride and 20 mol% of catalyst *ent-1a* (enantiomer of catalyst **1a**, 80 mg) were used instead. The diastereomeric ratio (d.r.) of the crude residue was determined to be >20:1 by  $^{19}\text{F}$  NMR. The crude residue was purified by silica gel column chromatography (10 to 40% diethyl ether in hexanes) to give **6c(anti)** (165 mg, 77%) as a white solid in >20:1 d.r.  $^1\text{H}$  NMR (500 MHz, 10%  $\text{CD}_3\text{OD}/\text{CDCl}_3$ ):  $\delta$  7.85 (d,  $J = 8.4$  Hz, 2H), 7.25 (d,  $J = 8.8$  Hz, 2H), 7.20 (d,  $J = 8.3$  Hz, 2H), 6.96 (d,  $J = 8.0$  Hz, 2H), 5.90 (d,  $J = 45.5$  Hz, 1H), 4.60 (dtd,  $J = 47.7, 9.1, 2.5$  Hz, 1H), 3.86–3.63 (m, 1H), 2.27 (s, 3H), 1.93–1.32 (m, 4H), 0.90 (t,  $J = 7.3$  Hz, 3H);  $^{13}\text{C}$  NMR (125.7 MHz, 10%  $\text{CD}_3\text{OD}/\text{CDCl}_3$ ):  $\delta$  147.1, 144.1 (d,  $J = 21.0$  Hz), 142.9, 138.7, 129.0, 125.9, 125.8, 123.0 (d,  $J = 1.7$  Hz), 91.6 (d,  $J = 176.0$  Hz), 90.0 (dd,  $J = 179.6, 4.6$  Hz), 61.1 (dd,  $J = 25.7, 19.3$  Hz), 33.5 (d,  $J = 20.2$  Hz), 20.7, 18.1 (d,  $J = 3.4$  Hz), 13.3;  $^{19}\text{F}$  NMR (470.4 MHz,  $\text{CDCl}_3$ ):  $\delta$  -187.11–187.49 (m), -203.61–203.89 (m); FTIR (thin film)  $\nu$  1517(s), 1332 (s), 852 (s), 533 (s)  $\text{cm}^{-1}$ ; HRMS (ESI-TOF) Calc'd for  $\text{C}_{19}\text{H}_{22}\text{F}_2\text{N}_2\text{O}_4\text{S}$   $[\text{M}+\text{H}]^+$ : 413.1341; found 413.1349;  $[\alpha]_{\text{D}}^{24} = -10.9^\circ$  (c 1.0,  $\text{CH}_3\text{CN}$ ).

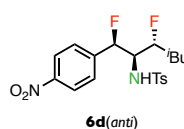

Prepared according to the general procedure using **5d** (202 mg, 0.52 mmol) with the following modification: 25 equiv hydrogen fluoride and 20 mol% of catalyst *ent-1a* (enantiomer of catalyst **1a**, 80 mg) were used instead. The diastereomeric ratio (d.r.) of the crude residue was determined to be >20:1 by  $^{19}\text{F}$  NMR. The crude residue was purified by silica gel column chromatography (10 to 40% diethyl ether in hexanes) to give **6d(anti)** (184 mg, 83%) as a white solid in >20:1 d.r.  $^1\text{H}$  NMR (500 MHz, 10%  $\text{CD}_3\text{OD}/\text{CDCl}_3$ ):  $\delta$  7.87 (d,  $J = 8.4$  Hz, 2H), 7.25 (d,  $J = 8.7$  Hz, 2H), 7.23 (d,  $J = 8.2$  Hz, 2H), 6.97 (d,  $J = 8.0$  Hz, 2H), 5.90 (d,  $J = 45.4$  Hz, 1H), 4.67 (dddd,  $J = 48.2, 10.6, 8.4, 2.5$  Hz, 1H), 3.72 (dt,  $J = 30.0, 8.2$  Hz, 1H), 2.27 (s, 3H), 1.92–1.77 (m, 1H), 1.67–1.47 (m, 2H), 0.90 (dd,  $J = 6.7, 2.1$  Hz, 6H);  $^{13}\text{C}$  NMR (125.7 MHz, 10%  $\text{CD}_3\text{OD}/\text{CDCl}_3$ ):  $\delta$  147.2, 144.0 (d,  $J = 21.2$  Hz), 143.0, 138.6, 129.1, 125.9, 125.9, 123.1, 91.96–90.37 (m), 90.37–88.54 (m), 61.50 (dd,  $J = 25.6, 19.1$  Hz), 40.41 (d,  $J = 20.0$  Hz), 24.40 (d,  $J = 2.2$  Hz), 23.13, 21.07, 20.84;  $^{19}\text{F}$  NMR (470.4 MHz,  $\text{CDCl}_3$ ):  $\delta$  -186.44 (dddt,  $J = 50.1, 42.4, 16.0, 8.2$  Hz), -203.15 (ddd,  $J = 45.3, 28.9, 7.2$  Hz); FTIR (thin film)  $\nu$  3371 (w), 1597 (w), 1518 (s), 1155 (s), 533 (s)  $\text{cm}^{-1}$ ; HRMS (ESI-TOF) Calc'd for  $\text{C}_{20}\text{H}_{24}\text{F}_2\text{N}_2\text{O}_4\text{S}$   $[\text{M}+\text{H}]^+$ : 427.1498; found 427.1496;  $[\alpha]_{\text{D}}^{24} = -6.05^\circ$  (c 1.0,  $\text{CH}_3\text{CN}$ ).

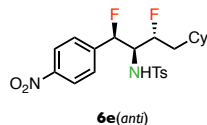

Prepared according to the general procedure using **5e** (223 mg, 0.52 mmol) with the following modification: 25 equiv hydrogen fluoride and 20 mol% of catalyst *ent-1a* (enantiomer of catalyst **1a**, 80 mg) were used instead. The diastereomeric ratio (d.r.) of the crude residue was determined to be >20:1 by  $^{19}\text{F}$  NMR. The crude residue was purified by silica gel column chromatography (10 to 40% diethyl ether in hexanes) to give **6e(anti)** (189 mg, 78%) as a white solid in >20:1 d.r.  $^1\text{H}$  NMR (500 MHz, 10%  $\text{CD}_3\text{OD}/\text{CDCl}_3$ ):  $\delta$  7.85 (d,  $J = 8.8$  Hz, 2H), 7.21 (d,  $J = 4.4$  Hz, 2H), 7.19 (d,  $J = 3.9$  Hz, 2H), 6.94 (d,  $J = 8.3$  Hz, 2H), 5.87 (d,  $J = 45.4$  Hz, 1H), 4.81–4.54 (m, 1H), 3.67 (dtd,  $J = 29.1, 8.3, 1.6$  Hz, 1H), 2.25 (s, 3H), 1.85–0.71 (m, 13H);  $^{13}\text{C}$  NMR (125.7 MHz, 10%  $\text{CD}_3\text{OD}/\text{CDCl}_3$ ):  $\delta$  147.4, 144.0 (d,  $J = 21.1$  Hz), 143.3, 138.5, 129.3, 126.1, 125.9 (d,  $J = 9.1$  Hz), 123.3 (d,  $J = 1.7$  Hz), 93.4–88.0 (m), 61.6 (dd,  $J = 25.4, 19.1$  Hz), 39.3 (d,  $J = 20.0$  Hz), 34.0, 33.9, 32.1, 26.4, 26.1 (d,  $J = 31.3$  Hz), 21.1;  $^{19}\text{F}$  NMR (470.4 MHz, 10%  $\text{CD}_3\text{OD}/\text{CDCl}_3$ ):  $\delta$  -185.61–185.99 (m), -203.12 (ddd,  $J = 45.4, 28.8, 7.5$  Hz); FTIR (thin film)  $\nu$  1523 (s), 1447 (m), 1161 (s), 542 (s)  $\text{cm}^{-1}$ ; HRMS (ESI-TOF) Calc'd for  $\text{C}_{23}\text{H}_{28}\text{F}_2\text{N}_2\text{O}_4\text{S}$   $[\text{M}+\text{H}]^+$ : 467.1811; found 467.1817;  $[\alpha]_{\text{D}}^{24} = -6.5^\circ$  (c 1.0,  $\text{CH}_3\text{CN}$ ).

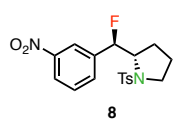

Prepared according to the general procedure using **7** (187 mg, 0.52 mmol) with the following modification: 10 equiv hydrogen fluoride was used instead. After work-up, the crude residue was purified by silica gel column chromatography (0 to 30% diethyl ether in hexanes) to give **8** (161 mg, 82%) as a white solid in 86% ee. Crystals of **8** were grown by vapor diffusion of pentane into a solution of the compound in ethyl acetate. These crystals were

filtered and dried *in vacuo* to give **8** in >99% ee (128 mg, 65%). <sup>1</sup>H NMR (500 MHz, CDCl<sub>3</sub>): δ 8.26–8.10 (m, 1H), 7.79–7.65 (m, 2H), 7.59 (t, *J* = 7.9 Hz, 1H), 7.32 (d, *J* = 7.9 Hz, 1H), 6.07 (dd, *J* = 47.6, 2.1 Hz, 1H), 3.90 (ddt, *J* = 27.9, 5.4, 2.8 Hz, 1H), 3.55–3.39 (m, 1H), 3.23 (dt, *J* = 10.2, 6.9 Hz, 1H), 2.41 (s, 2H), 2.02–1.83 (m, 1H), 1.64–1.48 (m, 1H), 1.49–1.32 (m, 1H); <sup>13</sup>C NMR (125.7 MHz, CDCl<sub>3</sub>): δ 148.5, 144.0, 139.9 (d, *J* = 21.2 Hz), 134.4, 131.2 (d, *J* = 8.2 Hz), 130.0, 129.8, 127.5, 123.2, 120.0 (d, *J* = 9.9 Hz), 94.5 (d, *J* = 183.7 Hz), 64.4 (d, *J* = 22.2 Hz), 49.5, 24.8 (d, *J* = 2.1 Hz), 21.6; <sup>19</sup>F NMR (470.4 MHz, CDCl<sub>3</sub>): δ -202.5 (dd, *J* = 47.6, 28.0 Hz); FTIR (thin film) ν 3091 (w), 1598 (w), 1531 (s), 1400 (s), 1156 (s), 588(s) cm<sup>-1</sup>; HRMS (ESI-TOF) Calc'd for C<sub>18</sub>H<sub>19</sub>FN<sub>2</sub>O<sub>4</sub>S [M+H]<sup>+</sup>: 379.1122; found 379.1115; [α]<sub>D</sub><sup>24</sup> = -120° (c 1.0, CHCl<sub>3</sub>).

86% ee, Chiral HPLC (AS-H, 50% isopropanol in hexanes, 1.0 mL/min, λ = 254 nm); t<sub>R</sub>(minor) = 14.9 min, t<sub>R</sub>(major) = 21.4 min.

Racemic sample:

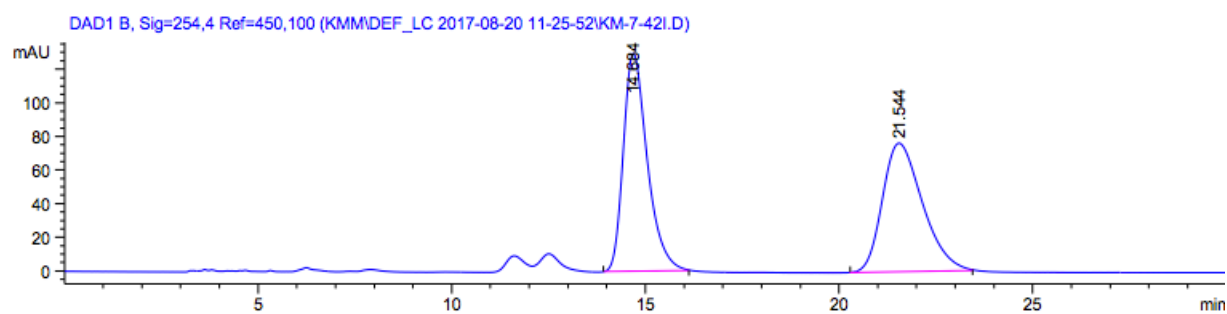

| Peak # | RetTime [min] | Type | Width [min] | Area [mAU*s] | Height [mAU] | Area %  |
|--------|---------------|------|-------------|--------------|--------------|---------|
| 1      | 14.684        | BB   | 0.6498      | 5586.34180   | 129.87555    | 50.3545 |
| 2      | 21.544        | BB   | 1.0773      | 5507.68604   | 76.56126     | 49.6455 |

Totals : 1.10940e4 206.43681

Enriched sample:

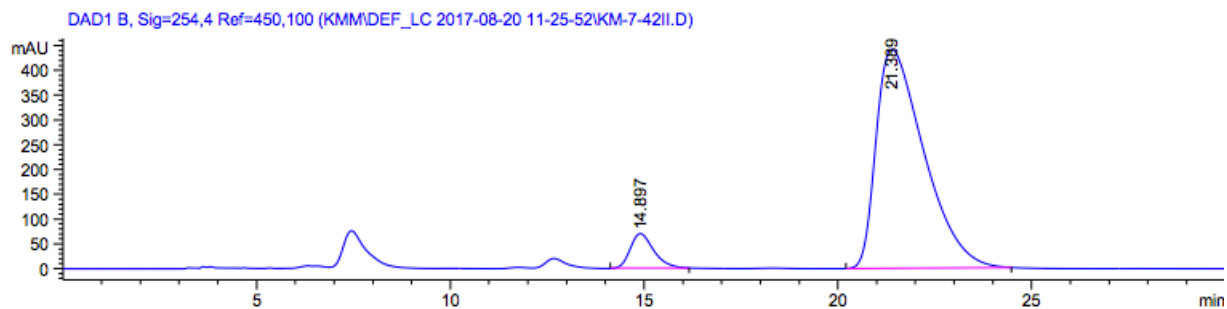

Signal 2: DAD1 B, Sig=254,4 Ref=450,100

| Peak # | RetTime [min] | Type | Width [min] | Area [mAU*s] | Height [mAU] | Area %  |
|--------|---------------|------|-------------|--------------|--------------|---------|
| 1      | 14.897        | BB   | 0.6486      | 2964.25171   | 69.91708     | 7.2321  |
| 2      | 21.389        | BB   | 1.2659      | 3.80234e4    | 441.88013    | 92.7679 |

Totals : 4.09877e4 511.79721

Upgraded (>99% ee) sample:

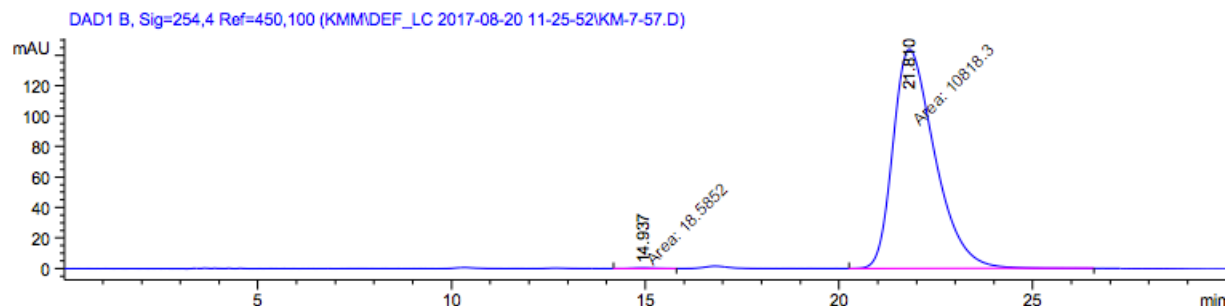

Signal 2: DAD1 B, Sig=254,4 Ref=450,100

| Peak # | RetTime [min] | Type | Width [min] | Area [mAU*s] | Height [mAU] | Area %  |
|--------|---------------|------|-------------|--------------|--------------|---------|
| 1      | 14.937        | MM   | 0.7423      | 18.58518     | 4.17295e-1   | 0.1715  |
| 2      | 21.810        | MM   | 1.2532      | 1.08183e4    | 143.87566    | 99.8285 |

Totals : 1.08369e4 144.29295

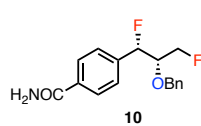

Prepared according to the general procedure using **9** (187 mg, 0.52 mmol) with the following modification: 100 equiv hydrogen fluoride and 20 mol% of catalyst **1a** were used instead. After work-up, the crude residue was purified by silica gel column chromatography (10 to 100% diethyl ether in hexanes) to give **10** (159 mg, 64%) as a white solid in 92% ee. Absolute configuration was assigned by analogy to an X-ray crystal structure of **4a**. <sup>1</sup>H NMR (500 MHz, CDCl<sub>3</sub>): δ 7.83 (d, *J* = 7.8 Hz, 2H), 7.51–7.41 (m, 2H), 7.32–7.27 (m, 3H), 7.23–7.18 (m, 2H), 6.10 (br. s, 1H), 5.80 (br. s, 1H), 5.67 (dd, *J* = 45.9, 4.6 Hz, 1H), 4.68–4.47 (m, 3H), 4.32 (ddd, *J* = 46.9, 9.9, 5.3 Hz, 1H), 3.91 (dddt, *J* = 19.6, 17.6, 5.4, 4.6 Hz, 1H); <sup>13</sup>C NMR (125.7 MHz, CDCl<sub>3</sub>): δ 169.3, 140.5 (d, *J* = 20.6 Hz), 137.4, 133.9, 128.6, 128.1, 127.7, 126.4 (d, *J* = 7.7 Hz), 92.4 (dd, *J* = 178.9, 6.5 Hz), 82.1 (dd, *J* = 172.3, 6.3 Hz), 79.4 (dd, *J* = 22.1, 19.5 Hz), 73.9; <sup>19</sup>F NMR (470.4 MHz, CDCl<sub>3</sub>): δ -194.57 (dd, *J* = 46.0, 19.5 Hz), -230.43 (td, *J* = 46.9, 17.5 Hz); FTIR (thin film) ν 3369 (br. s), 3176 (br. s), 1651 (s), 1394 (m), 1119 (m), 695 (m) cm<sup>-1</sup>; HRMS (ESI-TOF) Calc'd for C<sub>17</sub>H<sub>17</sub>F<sub>2</sub>NO<sub>4</sub>S [M+H]<sup>+</sup>: 274.0544; found 274.0555; [α]<sub>D</sub><sup>24</sup> = +13.3° (c 1.0, CH<sub>3</sub>CN).

92% ee, Chiral HPLC (IA, 5% isopropanol in hexanes, 1.0 mL/min, λ = 210 nm); t<sub>R</sub>(minor) = 43.9 min, t<sub>R</sub>(major) = 46.6 min.

Racemic sample:

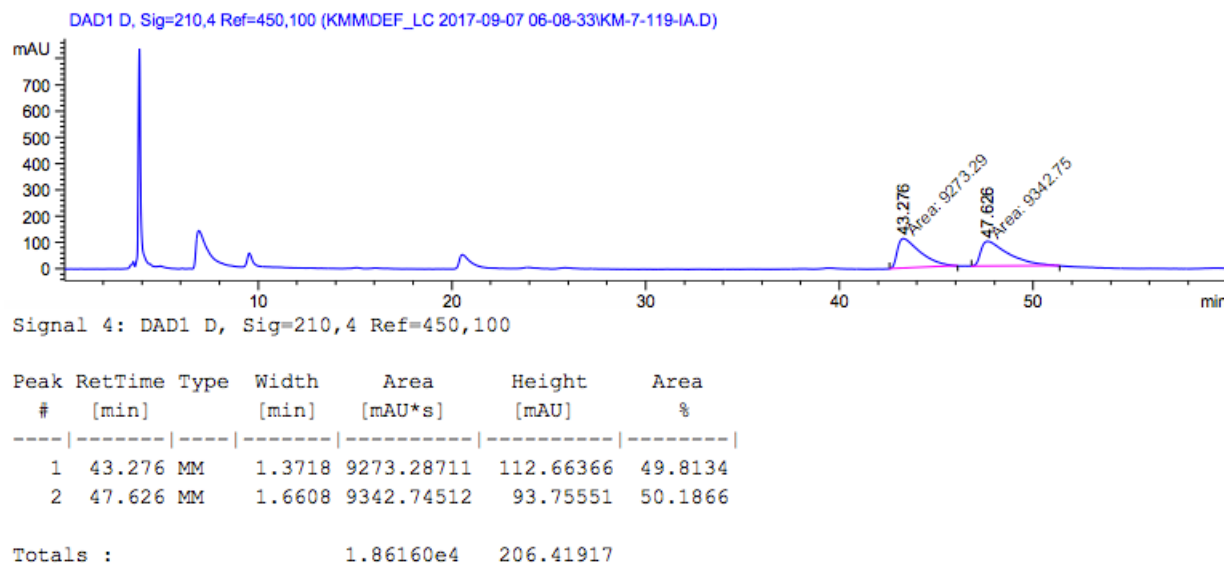

Enriched sample:

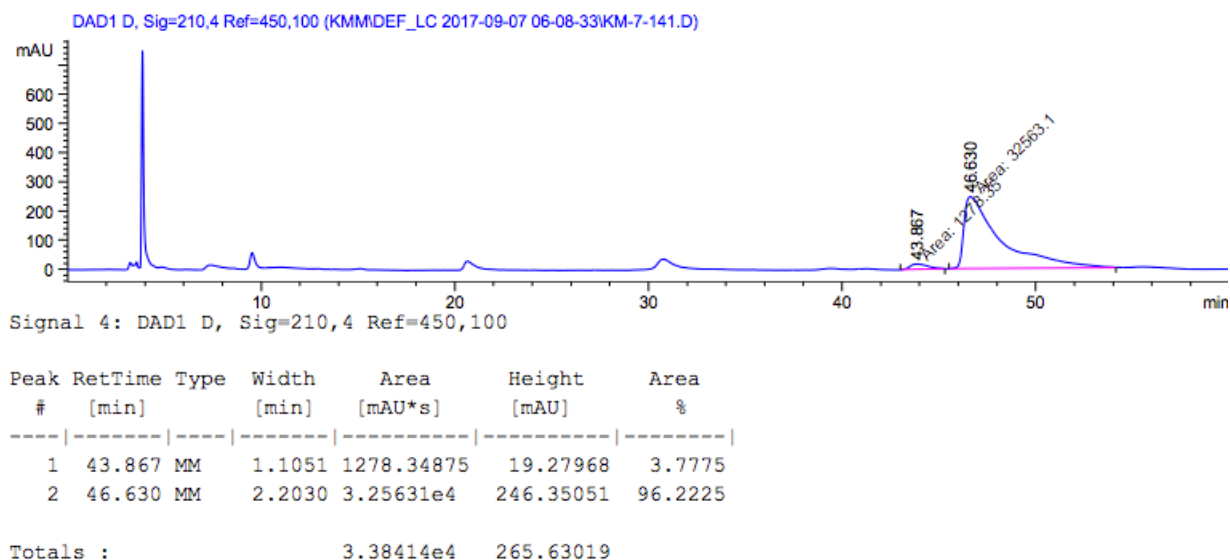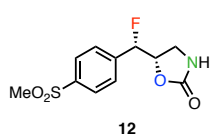

Prepared according to the general procedure using **11** (180 mg, 0.52 mmol) with the following modification: 100 equiv hydrogen fluoride and 20 mol% of catalyst **1a** were used instead. After work-up, the crude residue was purified by silica gel column chromatography (0 to 2% methanol in dichloromethane) to give **12** (109 mg, 77%) as a white solid in 93% ee. Crystals of **12** were grown by slow cooling of a solution of the compound in ethyl acetate. <sup>1</sup>H NMR (500 MHz, CDCl<sub>3</sub>): δ 8.01 (d, *J* = 8.4 Hz, 2H), 7.72–7.56 (m, 2H), 5.65 (dd, *J* = 45.0, 3.5 Hz, 1H), 5.17 (s, 1H), 4.96 (dddd, *J* = 18.9, 9.5, 6.3, 3.5 Hz, 1H), 3.89–3.46 (m, 2H), 3.08 (s, 3H); <sup>13</sup>C NMR (125.7 MHz, 10% CD<sub>3</sub>OD/CDCl<sub>3</sub>): δ 159.3, 140.9 (d, *J* = 13.0 Hz), 140.8 (d, *J* = 13.0 Hz), 127.6, 127.2 (d, *J* = 7.5 Hz), 91.5 (d, *J* = 182.4 Hz), 76.6 (d, *J* = 23.2 Hz), 44.1, 41.4 (d, *J* = 4.7 Hz); <sup>19</sup>F NMR (470.4 MHz, CDCl<sub>3</sub>): δ -193.99 (dd, *J* = 45.2, 20.6 Hz); FTIR (thin film) ν 1749 (s), 1410 (m), 1090 (s), 766 (m) cm<sup>-1</sup>; HRMS (ESI-TOF) Calc'd for C<sub>11</sub>H<sub>12</sub>FNO<sub>4</sub>S [M+H]<sup>+</sup>: 274.0544; found 274.0555; [α]<sub>D</sub><sup>24</sup> = +38.2° (c 1.0, CH<sub>3</sub>OH).

93% ee, Chiral HPLC (IA, 30% isopropanol in hexanes, 1.0 mL/min,  $\lambda = 210$  nm);  $t_R(\text{major}) = 16.3$  min,  $t_R(\text{minor}) = 23.8$  min.

Racemic sample:

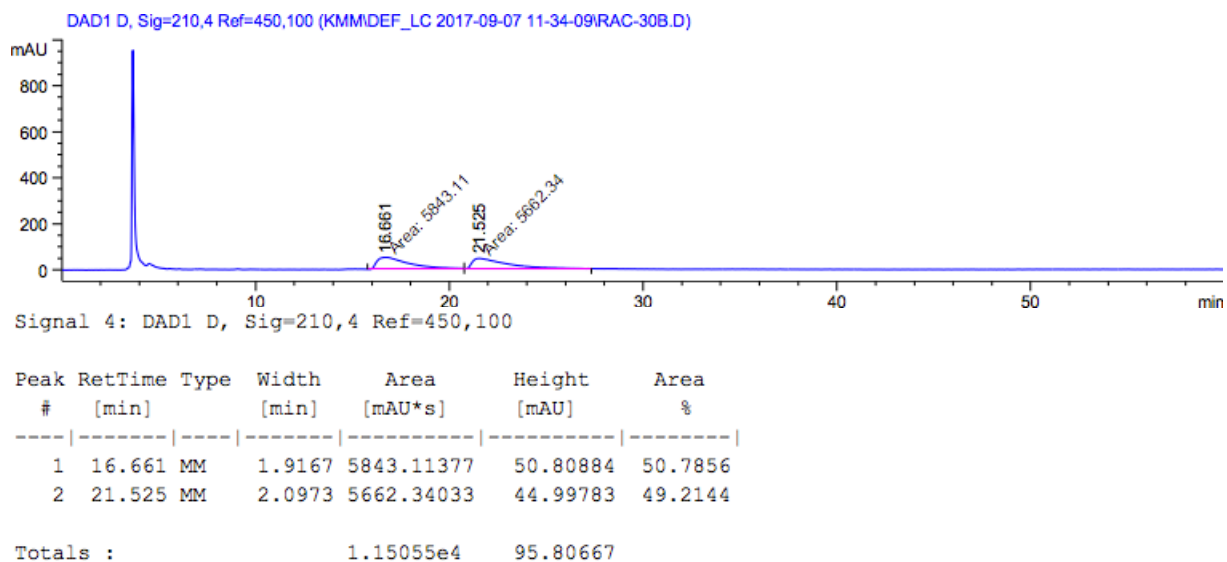

Enriched sample:

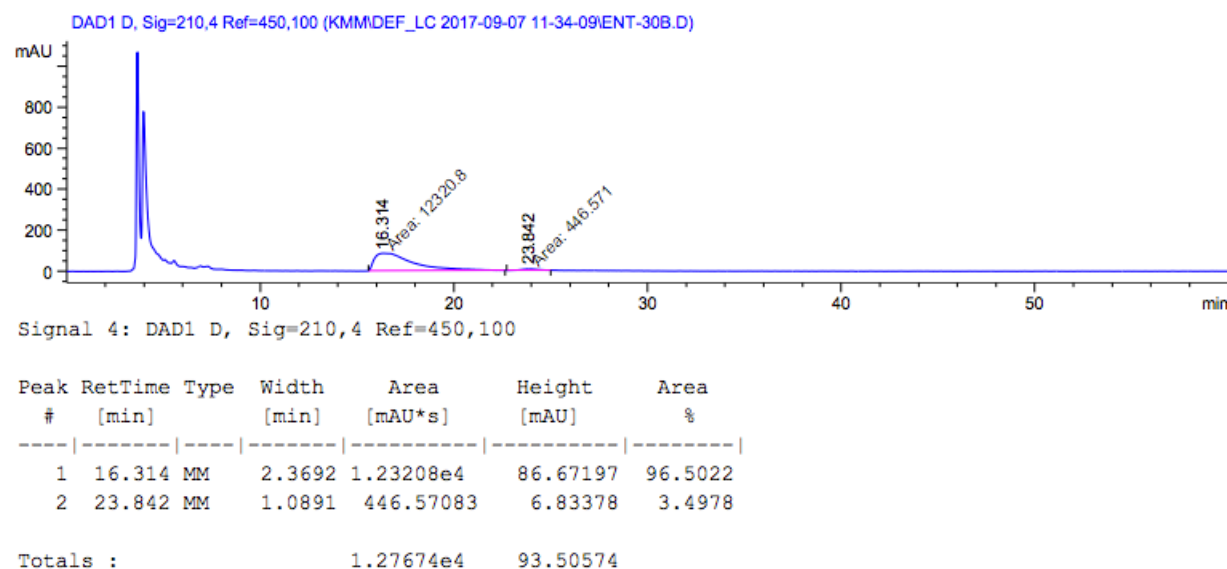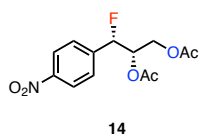

Prepared according to the general procedure using **13** (187 mg, 0.52 mmol) with the following modification: 100 equiv hydrogen fluoride and 20 mol% of catalyst **1a** were used instead. After work-up, the crude residue was purified by silica gel column chromatography (10 to 100% diethyl ether in hexanes) to give **14** (120 mg, 77%) as a white solid in 94% ee. The absolute configuration was assigned by analogy to an X-ray crystal structure of **16**.  $^1\text{H}$  NMR (500 MHz,  $\text{CDCl}_3$ ):  $\delta$  8.32–8.12 (m, 2H), 7.61–7.41 (m, 2H), 5.74 (dd,  $J = 45.9, 4.0$  Hz, 1H), 5.51–5.34 (m, 1H), 4.39 (ddd,  $J = 11.9, 4.7, 1.0$  Hz, 1H), 4.03 (dd,  $J = 11.9, 6.5$  Hz, 1H), 2.03 (s, 3H), 1.95 (s, 3H);  $^{13}\text{C}$  NMR (125.7 MHz,  $\text{CDCl}_3$ ):  $\delta$  170.4, 169.7, 148.3, 142.5 (d,  $J = 20.8$

Hz), 126.9 (d,  $J = 7.9$  Hz), 123.8, 90.8 (d,  $J = 182.1$  Hz), 71.8 (d,  $J = 21.2$  Hz), 61.8 (d,  $J = 6.2$  Hz), 20.7, 20.5;  $^{19}\text{F}$  NMR (470.4 MHz,  $\text{CDCl}_3$ ):  $\delta$  -195.72 (dd,  $J = 46.0, 22.9$  Hz); FTIR (thin film)  $\nu$  1742 (s), 1523 (s), 1212 (s), 1043 (s), 721 (m)  $\text{cm}^{-1}$ ; HRMS (ESI-TOF) Calc'd for  $\text{C}_{13}\text{H}_{14}\text{FNO}_6$   $[\text{M}+\text{H}]^+$ : 300.0878; found 300.0893;  $[\alpha]_{\text{D}}^{26} = +1.4^\circ$  (c 1.0,  $\text{CH}_3\text{CN}$ ).

94% ee, Chiral HPLC (whelk, 10% isopropanol in hexanes, 1.0 mL/min,  $\lambda = 254$  nm);  $t_{\text{R}}$ (minor) = 17.1 min,  $t_{\text{R}}$ (major) = 18.9 min.

Racemic sample:

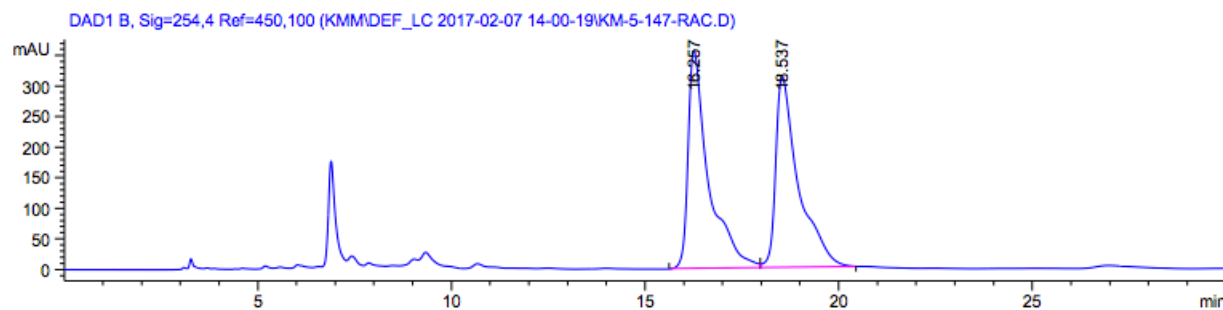

Signal 2: DAD1 B, Sig=254,4 Ref=450,100

| Peak # | RetTime [min] | Type | Width [min] | Area [mAU*s] | Height [mAU] | Area %  |
|--------|---------------|------|-------------|--------------|--------------|---------|
| 1      | 16.257        | BV   | 0.5212      | 1.31420e4    | 357.23099    | 50.6881 |
| 2      | 18.537        | VB   | 0.5814      | 1.27852e4    | 312.45844    | 49.3119 |

Totals : 2.59273e4 669.68942

Enriched sample:

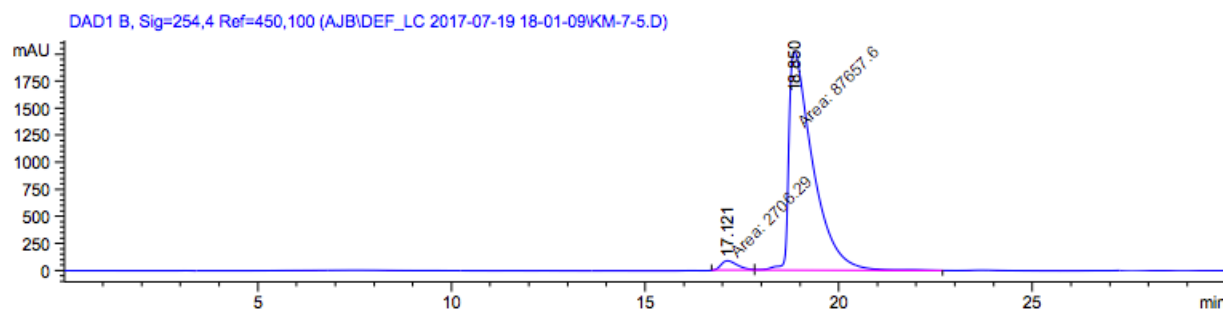

Signal 2: DAD1 B, Sig=254,4 Ref=450,100

| Peak # | RetTime [min] | Type | Width [min] | Area [mAU*s] | Height [mAU] | Area %  |
|--------|---------------|------|-------------|--------------|--------------|---------|
| 1      | 17.121        | MM   | 0.5083      | 2706.29297   | 88.74250     | 2.9949  |
| 2      | 18.850        | MM   | 0.7215      | 8.76576e4    | 2024.92297   | 97.0051 |

Totals : 9.03639e4 2113.66547

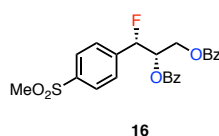

Prepared according to the general procedure using **15** (187 mg, 0.52 mmol) with the following modification: 100 equiv hydrogen fluoride and 20 mol% of catalyst **1a** were used instead. After work-up, the crude residue was purified by silica gel column chromatography (10 to 100% diethyl ether in hexanes) to give **16** (173 mg, 73%) as a



white solid in 94% ee. Crystals of **16** were grown by vapor diffusion of pentane into a solution of the compound in ethyl acetate. <sup>1</sup>H NMR (500 MHz, CDCl<sub>3</sub>): δ 8.03–7.86 (m, 6H), 7.69–7.61 (m, 2H), 7.58–7.51 (m, 2H), 7.45–7.37 (m, 4H), 6.07–5.82 (m, 2H), 4.74 (ddd, *J* = 11.9, 4.7, 0.9 Hz, 1H), 4.49 (dd, *J* = 11.9, 6.4 Hz, 1H), 2.97 (s, 3H); <sup>13</sup>C NMR (125.7 MHz, CDCl<sub>3</sub>): δ 165.9, 165.2, 141.5 (d, *J* = 20.6 Hz), 141.1, 133.6, 133.4, 129.8, 129.7, 129.2, 128.9, 128.6, 128.5, 127.8, 127.0 (d, *J* = 7.8 Hz), 91.1 (d, *J* = 182.1 Hz), 72.4 (d, *J* = 22.0 Hz), 62.3 (d, *J* = 5.8 Hz), 44.3; <sup>19</sup>F NMR (470.4 MHz, CDCl<sub>3</sub>): δ -194.0 (dd, *J* = 45.6, 21.2 Hz); FTIR (thin film) ν 3064 (w), 1720 (s), 1451 (w), 1150 (s), 909 (m), 708 (s) cm<sup>-1</sup>; HRMS (ESI-TOF) Calc'd for C<sub>24</sub>H<sub>21</sub>FO<sub>6</sub>S [M+H]<sup>+</sup>: 457.1116; found 457.1107. [α]<sub>D</sub><sup>24</sup> = +20.8° (c 1.0, CH<sub>3</sub>OH).

94% ee, Chiral HPLC (AD-H, 30% isopropanol in hexanes, 1.0 mL/min, λ = 230 nm); t<sub>R</sub>(minor) = 19.9 min, t<sub>R</sub>(major) = 21.8 min.

Racemic sample:

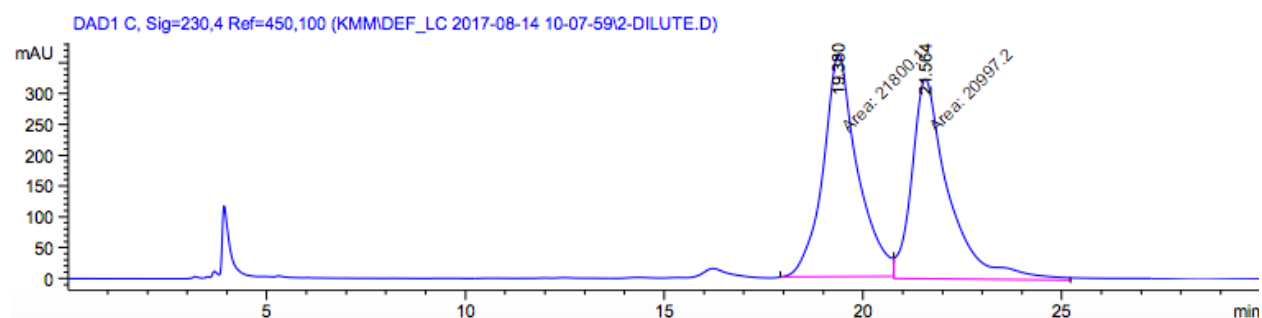

Signal 3: DAD1 C, Sig=230,4 Ref=450,100

| Peak # | RetTime [min] | Type | Width [min] | Area [mAU*s] | Height [mAU] | Area %  |
|--------|---------------|------|-------------|--------------|--------------|---------|
| 1      | 19.380        | MM   | 1.0044      | 2.18001e4    | 361.76038    | 50.9380 |
| 2      | 21.564        | MM   | 1.0784      | 2.09972e4    | 324.51047    | 49.0620 |

Totals : 4.27972e4 686.27084

Enriched sample:

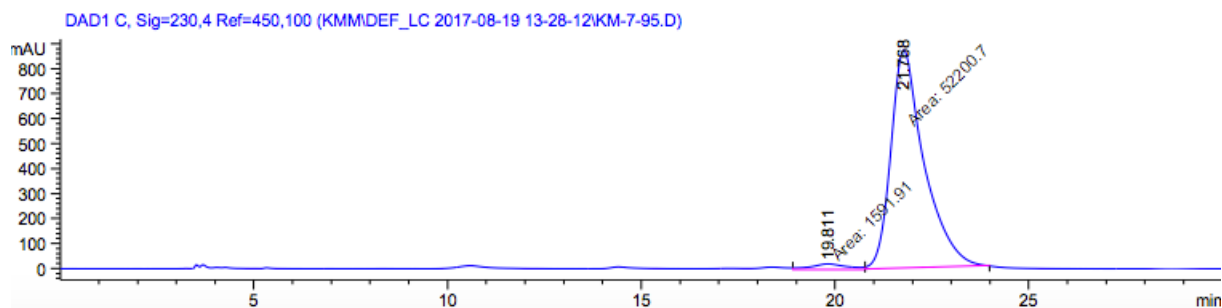

Signal 3: DAD1 C, Sig=230,4 Ref=450,100

| Peak #   | RetTime [min] | Type | Width [min] | Area [mAU*s] | Height [mAU] | Area %  |
|----------|---------------|------|-------------|--------------|--------------|---------|
| 1        | 19.811        | MM   | 1.1281      | 1591.90503   | 23.51830     | 2.9593  |
| 2        | 21.768        | MM   | 0.9961      | 5.22007e4    | 873.43707    | 97.0407 |
| Totals : |               |      |             | 5.37926e4    | 896.95537    |         |

## Synthetic Elaboration Studies.

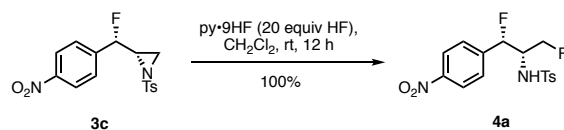

To a solution of **3c** (65.0 mg, 0.186 mmol, 1 equiv) in dichloromethane (1 mL) in a low-density polyethylene tube was added HF•pyridine (py•9HF, 70% hydrogen fluoride by weight, 100  $\mu\text{L}$ , 20 equiv hydrogen fluoride). The reaction mixture was stirred at room temperature for 12 hours. The heterogeneous mixture was transferred carefully into a vigorously stirred suspension of basic alumina (0.5 g) in dichloromethane at  $-78\text{ }^\circ\text{C}$ . The resulting suspension was allowed to warm to room temperature and filtered, washing with 10 mL dichloromethane. The combined filtrate was concentrated under reduced pressure to give **4a** as a white solid (68.6 mg, 100%). Crystals of **4a** were grown by vapor diffusion of pentane into a solution of the compound in ethyl acetate.  $^1\text{H}$  NMR (500 MHz, 10%  $\text{CD}_3\text{OD}/\text{CDCl}_3$ ):  $\delta$  7.99 (d,  $J = 8.7$  Hz, 2H), 7.37 (d,  $J = 8.2$  Hz, 2H), 7.27 (d,  $J = 8.7$  Hz, 2H), 7.06 (d,  $J = 8.7$  Hz, 2H), 5.83 (d,  $J = 45.6$  Hz, 1H), 4.96 (d,  $J = 9.5$  Hz, 1H), 4.72–4.45 (m, 2H), 3.90–3.72 (m, 1H), 2.35 (s, 3H);  $^{13}\text{C}$  NMR (125.7 MHz, 10%  $\text{CD}_3\text{OD}/\text{CDCl}_3$ ):  $\delta$  147.5, 143.5, 143.3 (d,  $J = 21.1$  Hz), 137.2, 129.3, 126.4, 126.0 (d,  $J = 8.6$  Hz), 123.3, 89.8 (dd,  $J = 180.1, 2.4$  Hz), 80.8 (dd,  $J = 176.3, 4.3$  Hz), 56.9 (dd,  $J = 22.0, 20.6$  Hz), 21.1;  $^{19}\text{F}$  NMR (470.4 MHz, 10%  $\text{CD}_3\text{OD}/\text{CDCl}_3$ ):  $\delta$  -203.2 (dd,  $J = 45.3, 25.6$  Hz, 1F), -223.2 (td,  $J = 46.7, 10.7$  Hz, 1F); FTIR (thin film)  $\nu$  3281 (br. m), 1790 (w), 1522 (s), 1346 (s), 1160 (s), 548 (m)  $\text{cm}^{-1}$ ; HRMS (ESI-TOF) Calc'd for  $\text{C}_{16}\text{H}_{16}\text{F}_2\text{N}_2\text{O}_4\text{S}$   $[\text{M}+\text{H}]^+$ : 371.0872; found 371.0866;  $[\alpha]_{\text{D}}^{26} = +33.45^\circ$  (c 1.0,  $\text{CH}_3\text{CN}$ ).

99% ee, Chiral HPLC (whelk, 10% isopropanol in hexanes, 1.0 mL/min,  $\lambda = 210$  nm);  $t_{\text{R}}$ (minor) = 21.0 min,  $t_{\text{R}}$ (major) = 26.8 min.

Racemic sample:

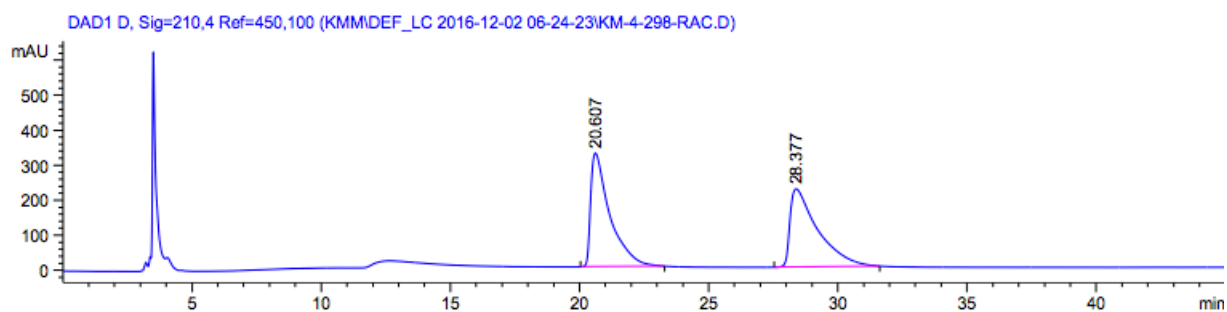

Signal 4: DAD1 D, Sig=210,4 Ref=450,100

| Peak # | RetTime [min] | Type | Width [min] | Area [mAU*s] | Height [mAU] | Area %  |
|--------|---------------|------|-------------|--------------|--------------|---------|
| 1      | 20.607        | BB   | 0.7391      | 1.67828e4    | 324.67023    | 50.2482 |
| 2      | 28.377        | BB   | 1.0231      | 1.66170e4    | 223.05663    | 49.7518 |

Totals :  3.33998e4  547.72685

Enriched sample:

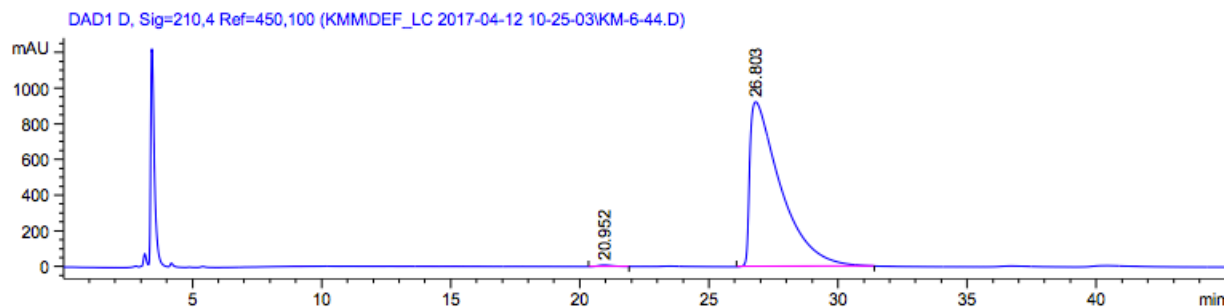

Signal 4: DAD1 D, Sig=210,4 Ref=450,100

| Peak # | RetTime [min] | Type | Width [min] | Area [mAU*s] | Height [mAU] | Area %  |
|--------|---------------|------|-------------|--------------|--------------|---------|
| 1      | 20.952        | BB   | 0.4807      | 307.36530    | 7.61842      | 0.3997  |
| 2      | 26.803        | BB   | 1.0921      | 7.65846e4    | 922.89575    | 99.6003 |

Totals : 7.68920e4 930.51417

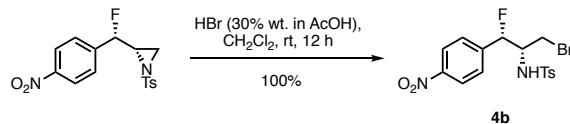

To a solution of **3c** (65.0 mg, 0.186 mmol, 1 equiv) in dichloromethane (1 mL) was added hydrobromic acid (33 wt. % in acetic acid, 1 mL). The reaction mixture was stirred at room temperature for 12 hours. The solution was transferred carefully into a vigorously stirred suspension of basic alumina (0.5 g) in dichloromethane at  $-78^{\circ}\text{C}$ . The resulting suspension was allowed to warm to room temperature and filtered, washing with 10 mL 1:1 diethyl ether:dichloromethane. The combined filtrate was concentrated under reduced pressure to give **4b** as an orange solid (80.0 mg, 100%).  $^1\text{H}$  NMR (500 MHz,  $\text{CDCl}_3$ ):  $\delta$  7.99 (d,  $J = 8.6$  Hz, 2H), 7.39–7.33 (m, 2H), 7.26 (d,  $J = 8.6$  Hz, 2H), 7.05 (d,  $J = 7.9$  Hz, 2H), 6.07 (d,  $J = 44.6$  Hz, 1H), 4.90 (d,  $J = 9.3$  Hz, 1H), 3.77–3.66 (m, 1H), 3.66–3.56 (m, 2H), 2.35 (s, 3H);  $^{13}\text{C}$  NMR (125.7 MHz,  $\text{CDCl}_3$ ):  $\delta$  147.67, 144.12, 142.96 (d,  $J = 19.8$  Hz), 136.4, 129.7, 127.1, 126.1 (d,  $J = 6.6$  Hz), 123.6, 90.3 (d,  $J = 180.7$  Hz), 59.1 (d,  $J = 19.6$  Hz), 31.6, 21.4;  $^{19}\text{F}$  NMR (470.4 MHz,  $\text{CDCl}_3$ ):  $\delta$  -202.6 (dd,  $J = 45.6, 23.1$  Hz); FTIR (thin film)  $\nu$  3274 (br. m), 1608 (w), 1522 (s), 1157 (s), 946 (m), 548 (s)  $\text{cm}^{-1}$ ; HRMS (ESI-TOF) Calc'd for  $\text{C}_{16}\text{H}_{16}\text{BrFN}_2\text{O}_4\text{S}$   $[\text{M}+\text{H}]^+$ : 431.0071; found 431.0066;  $[\alpha]_{\text{D}}^{25} = +14.2^{\circ}$  (c 1.0,  $\text{CH}_3\text{OH}$ ).

99% ee, Chiral HPLC (AD-H, 20% isopropanol in hexanes, 1.0 mL/min,  $\lambda = 254$  nm);  $t_{\text{R}}$ (minor) = 10.9 min,  $t_{\text{R}}$ (major) = 13.4 min.

Racemic sample:

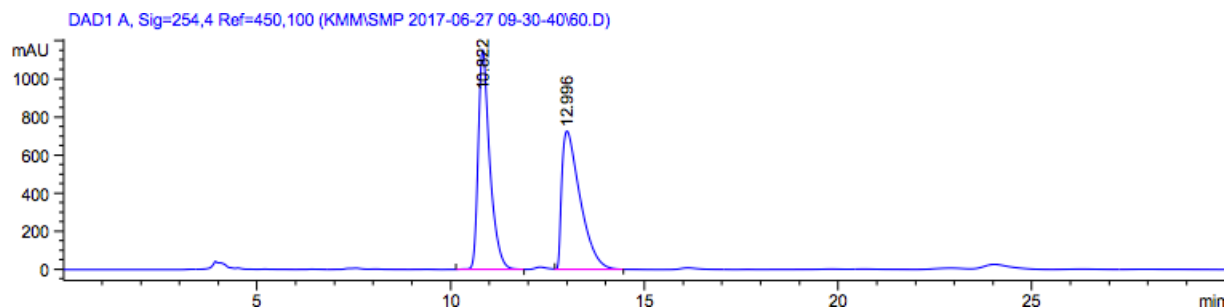

Signal 1: DAD1 A, Sig=254,4 Ref=450,100

| Peak # | RetTime [min] | Type | Width [min] | Area [mAU*s] | Height [mAU] | Area %  |
|--------|---------------|------|-------------|--------------|--------------|---------|
| 1      | 10.822        | BB   | 0.3083      | 2.39347e4    | 1152.55505   | 50.0350 |
| 2      | 12.996        | VB   | 0.4959      | 2.39012e4    | 726.38916    | 49.9650 |

Totals : 4.78360e4 1878.94421

Enriched sample:

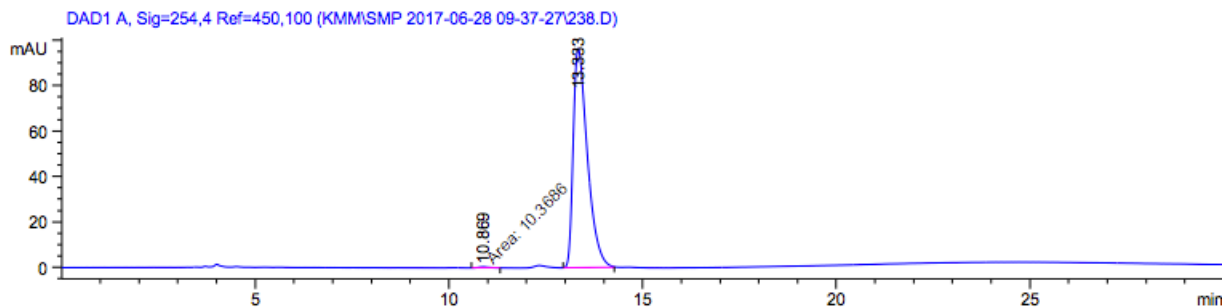

Signal 1: DAD1 A, Sig=254,4 Ref=450,100

| Peak # | RetTime [min] | Type | Width [min] | Area [mAU*s] | Height [mAU] | Area %  |
|--------|---------------|------|-------------|--------------|--------------|---------|
| 1      | 10.869        | MM   | 0.3400      | 10.36864     | 5.08316e-1   | 0.4226  |
| 2      | 13.333        | BB   | 0.3839      | 2442.94775   | 96.32810     | 99.5774 |

Totals : 2453.31639 96.83642

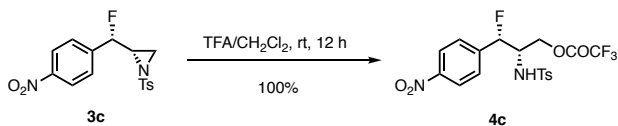

To a solution of **3c** (65.0 mg, 0.186 mmol, 1 equiv) in dichloromethane (1 mL) was added trifluoroacetic acid (0.5 mL). The reaction mixture was stirred at room temperature for 12 hours, concentrated under reduced pressure to give **4c** as a white solid (86.2 mg, 100%). <sup>1</sup>H NMR (500 MHz, CDCl<sub>3</sub>): δ 7.94 (d, *J* = 8.5 Hz, 2H), 7.34 (d, *J* = 8.3 Hz, 2H), 7.26 (d, *J* = 8.7 Hz, 2H), 7.05 (d, *J* = 8.0 Hz, 1H), 5.76 (dd, *J* = 45.5, 2.1 Hz, 1H), 5.55 (d, *J* = 9.3 Hz, 1H), 4.78–4.35 (m, 2H), 4.18–3.90 (m, 1H), 2.34 (s, 3H); <sup>13</sup>C NMR (125.7 MHz, CDCl<sub>3</sub>): δ 157.0 (q, *J* = 43.3 Hz), 147.9, 144.3, 142.2 (d, *J* = 20.8 Hz), 136.5, 129.7, 126.7, 125.9 (d, *J* = 9.0 Hz), 123.6 (d, *J* = 1.5 Hz), 121.1–109.0 (m), 90.4 (d, *J* = 181.5 Hz), 66.0 (d, *J* = 3.9 Hz), 56.1 (d, *J* = 20.7 Hz), 21.4; <sup>19</sup>F NMR (470.4 MHz, CDCl<sub>3</sub>): δ -74.7 (s, 3F), -201.6 (dd, *J* = 45.5, 25.9 Hz, 1F); FTIR (thin film) ν 3277 (br. w), 1788 (m), 1523 (m), 1151 (s), 733 (m) cm<sup>-1</sup>; HRMS (ESI-TOF) Calc'd for C<sub>18</sub>H<sub>16</sub>F<sub>4</sub>N<sub>2</sub>O<sub>6</sub>S [M+H]<sup>+</sup>: 465.0738; found 465.0749; [α]<sub>D</sub><sup>25</sup> = +20.8° (c 1.0, CH<sub>3</sub>OH).

99% ee, Chiral HPLC (OJ-H, 40% isopropanol in hexanes, 1.0 mL/min, λ = 254 nm); t<sub>R</sub>(minor) = 22.8 min, t<sub>R</sub>(major) = 30.4 min.

Racemic sample:

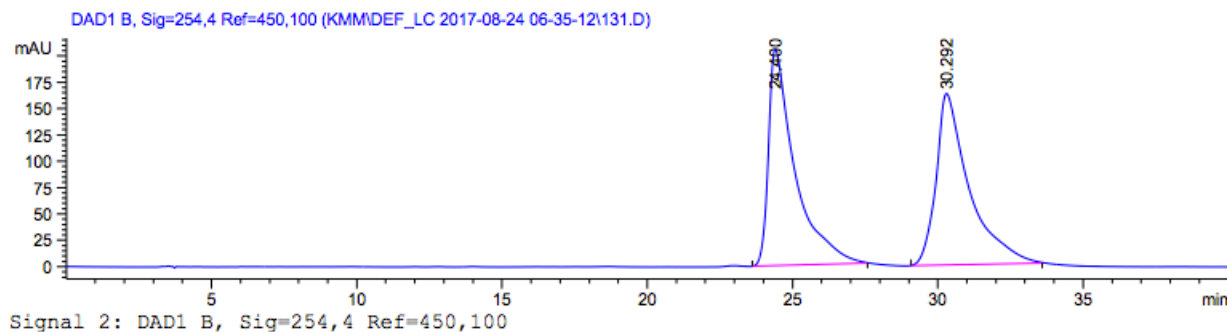

Enriched sample:

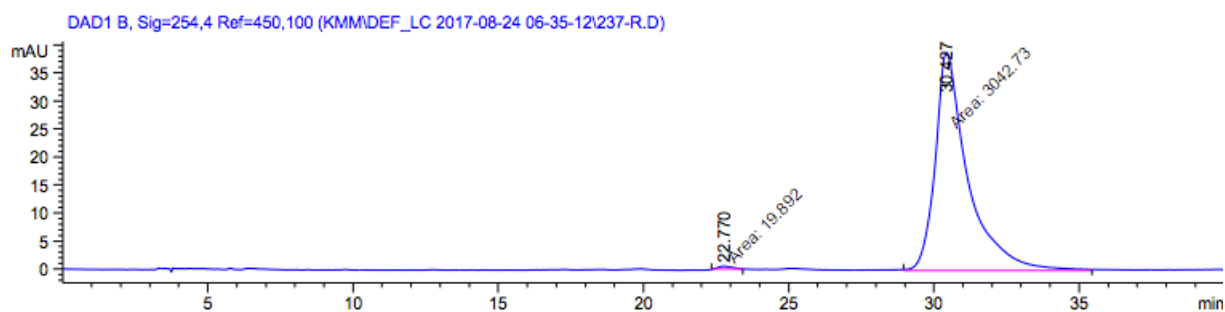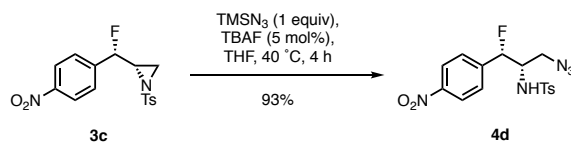

To a solution of **3c** (65.0 mg, 0.186 mmol, 1 equiv) in anhydrous tetrahydrofuran (2.1 mL) under nitrogen atmosphere was added azidotrimethylsilane (25.0  $\mu\text{L}$ , 0.188 mmol, 1.0 equiv) followed by tetrabutylammonium fluoride (1.0 M in THF, 8.9  $\mu\text{L}$ , 5 mol%). The reaction mixture was warmed to 40 °C and stirred for 4 hours. After cooling to room temperature, the solution was filtered through a plug of silica, washing with diethyl ether. The filtrate was concentrated under reduced pressure to give **4d** as a white solid (66.6 mg, 93%).  $^1\text{H}$  NMR (500 MHz,  $\text{CD}_3\text{CN}$ ):  $\delta$  7.95 (d,  $J$  = 8.6 Hz, 2H), 7.53–7.23 (m, 4H),

7.09 (d,  $J = 7.9$  Hz, 2H), 6.11 (s, 1H), 5.78 (d,  $J = 45.5$  Hz, 1H), 3.88–3.73 (m, 1H), 3.54 (ddd,  $J = 64.3, 12.7, 6.8$  Hz, 2H), 2.30 (s, 3H);  $^{13}\text{C}$  NMR (125.7 MHz,  $\text{CD}_3\text{CN}$ ):  $\delta$  148.6, 144.57 (d,  $J = 20.8$  Hz), 144.2, 138.9, 130.3, 127.3, 127.3, 124.1, 58.38 (d,  $J = 20.7$  Hz), 53.16 (d,  $J = 3.9$  Hz), 21.3;  $^{19}\text{F}$  NMR (470.4 MHz,  $\text{CD}_3\text{CN}$ ):  $\delta$  -200.8–201.2 (m); FTIR (thin film)  $\nu$  3259 (m), 2108 (s), 1521 (s), 1346 (s), 1159 (s), 562 (m)  $\text{cm}^{-1}$ ; HRMS (ESI-TOF) Calc'd for  $\text{C}_{16}\text{H}_{16}\text{FN}_5\text{O}_4\text{S}$   $[\text{M}+\text{H}]^+$ : 394.0980; found 394.0971;  $[\alpha]_{\text{D}}^{25} = +47.2^\circ$  (c 1.0,  $\text{CH}_3\text{OH}$ ).

99% ee, Chiral HPLC (AD-H, 20% isopropanol in hexanes, 1.0 mL/min,  $\lambda = 254$  nm);  $t_{\text{R}}$ (minor) = 12.2 min,  $t_{\text{R}}$ (major) = 16.1 min.

Racemic sample:

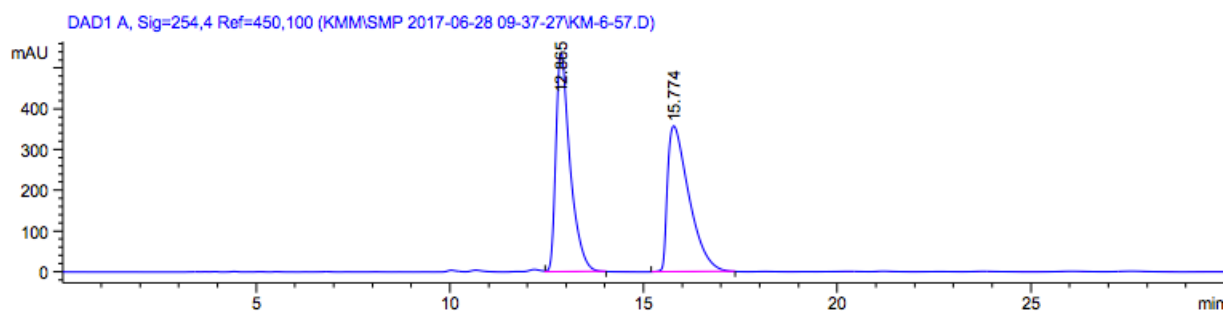

Signal 1: DAD1 A, Sig=254,4 Ref=450,100

| Peak # | RetTime [min] | Type | Width [min] | Area [mAU*s] | Height [mAU] | Area %  |
|--------|---------------|------|-------------|--------------|--------------|---------|
| 1      | 12.865        | VB   | 0.3801      | 1.37566e4    | 538.43182    | 49.8704 |
| 2      | 15.774        | BB   | 0.5865      | 1.38281e4    | 358.09665    | 50.1296 |

Totals : 2.75847e4 896.52847

Enriched sample:

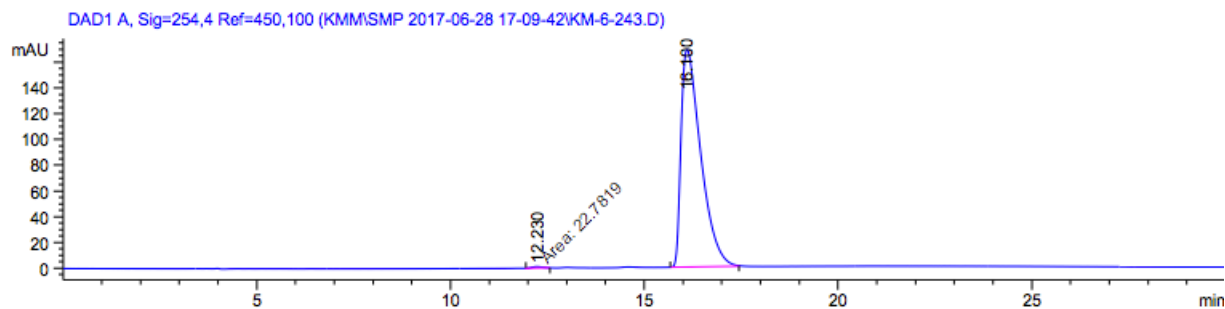

Signal 1: DAD1 A, Sig=254,4 Ref=450,100

| Peak # | RetTime [min] | Type | Width [min] | Area [mAU*s] | Height [mAU] | Area %  |
|--------|---------------|------|-------------|--------------|--------------|---------|
| 1      | 12.230        | MM   | 0.3299      | 22.78185     | 1.15102      | 0.3807  |
| 2      | 16.100        | BB   | 0.5378      | 5961.09375   | 168.88438    | 99.6193 |

Totals : 5983.87560 170.03540

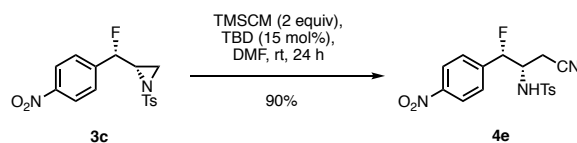

To a solution of 1,5,7-triazabicyclo[4.4.0]dec-5-ene (3.8 mg, 0.027 mmol, 15 mol%) in anhydrous dimethylformamide (0.6 mL) was added **3c** (65.0 mg, 0.186 mmol, 1 equiv) followed by trimethylsilyl cyanide (47.0  $\mu\text{L}$ , 0.376 mmol, 2.0 equiv). The reaction mixture was stirred at room temperature. After 24 hours, the solution was diluted with diethyl ether (10 mL) and washed with 1 M  $\text{HCl}_{(\text{aq})}$  (5 mL), water (3 x 5 mL) and brine (5 mL), dried over  $\text{NaSO}_4$ , filtered and concentrated under reduced pressure to **4e** as a white solid (63.2 mg, 90%).  $^1\text{H}$  NMR (500 MHz,  $\text{CDCl}_3$ ):  $\delta$  7.94 (d,  $J$  = 8.3 Hz, 2H), 7.44–7.32 (m, 4H), 7.26 (d,  $J$  = 8.4 Hz, 2H), 7.05 (d,  $J$  = 7.9 Hz, 1H), 5.83 (dd,  $J$  = 45.6, 2.2 Hz, 1H), 5.63 (d,  $J$  = 9.3 Hz, 1H), 3.90 (dddd,  $J$  = 25.2, 10.4, 8.0, 3.4 Hz, 1H), 3.16–2.81 (m, 2H), 2.35 (s, 3H);  $^{13}\text{C}$  NMR (125.7 MHz,  $\text{CDCl}_3$ ):  $\delta$  147.9, 144.5, 142.0 (d,  $J$  = 20.9 Hz), 136.2, 129.7, 126.7, 125.9 (d,  $J$  = 8.8 Hz), 123.6, 116.4, 91.8 (d,  $J$  = 182.4 Hz), 54.8 (d,  $J$  = 20.9 Hz), 22.4 (d,  $J$  = 3.7 Hz), 21.4;  $^{19}\text{F}$  NMR (470.4 MHz,  $\text{CDCl}_3$ ):  $\delta$  -201.0 (dd,  $J$  = 45.6, 25.9 Hz); FTIR (thin film)  $\nu$  3270 (br. m), 1609 (w), 1523 (s), 1346 (s), 1158 (s), 732 (m)  $\text{cm}^{-1}$ ; HRMS (ESI-TOF) Calc'd for  $\text{C}_{17}\text{H}_{16}\text{FN}_3\text{O}_4\text{S}$   $[\text{M}+\text{H}]^+$ : 378.0918; found 378.0914;  $[\alpha]_{\text{D}}^{25} = +21.4^\circ$  (c 1.0,  $\text{CH}_3\text{OH}$ ).

99% ee, Chiral HPLC (AD-H, 20% isopropanol in hexanes, 1.0 mL/min,  $\lambda$  = 254 nm);  $t_{\text{R}}(\text{minor})$  = 15.3 min,  $t_{\text{R}}(\text{major})$  = 17.7 min.

Racemic sample:

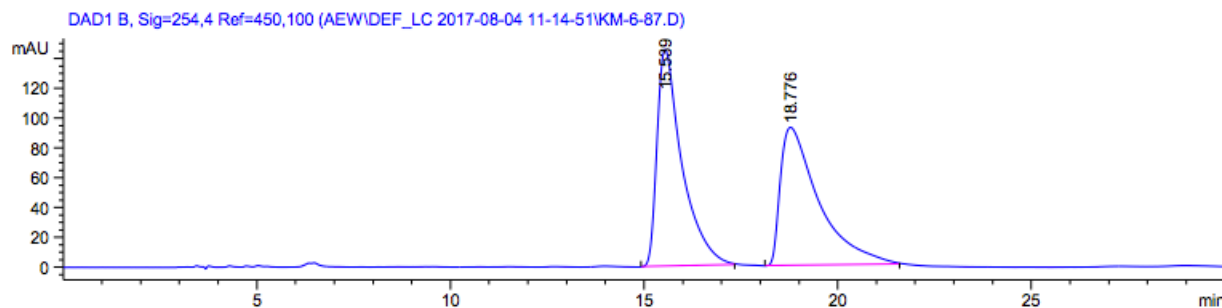

Signal 2: DAD1 B, Sig=254,4 Ref=450,100

| Peak # | RetTime [min] | Type | Width [min] | Area [mAU*s] | Height [mAU] | Area %  |
|--------|---------------|------|-------------|--------------|--------------|---------|
| 1      | 15.539        | BB   | 0.6484      | 6524.58691   | 145.71365    | 50.4887 |
| 2      | 18.776        | BB   | 0.9749      | 6398.27490   | 92.74018     | 49.5113 |

Totals : 1.29229e4 238.45383

Enriched sample:



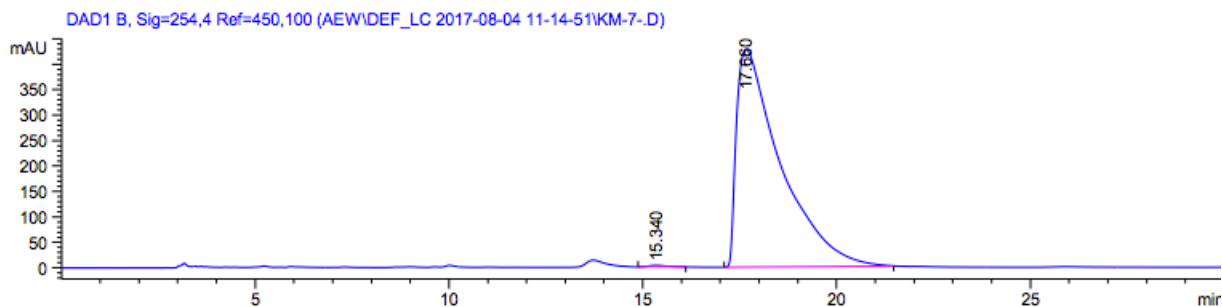

| Peak # | RetTime [min] | Type | Width [min] | Area [mAU*s] | Height [mAU] | Area %  |
|--------|---------------|------|-------------|--------------|--------------|---------|
| 1      | 15.340        | BB   | 0.4146      | 104.34280    | 3.11625      | 0.3078  |
| 2      | 17.660        | BB   | 1.1266      | 3.37971e4    | 428.31116    | 99.6922 |

Totals : 3.39015e4 431.42741

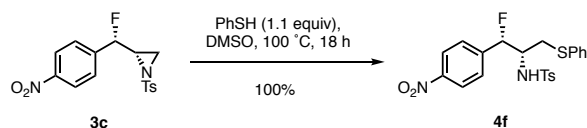

To a solution of **3c** (65.0 mg, 0.186 mmol, 1 equiv) in dimethyl sulfoxide (0.36 mL) was added thiophenol (21.6  $\mu\text{L}$ , 0.210 mmol, 1.1 equiv). The reaction mixture was heated to 100  $^\circ\text{C}$  for 18 hours. After cooling to room temperature, the crude mixture was purified by silica gel column chromatography (10 to 100% diethyl ether in hexanes) to give **4f** as a white solid (85.7 mg, 100%).  $^1\text{H NMR}$  (500 MHz,  $\text{CDCl}_3$ ):  $\delta$  7.88 (d,  $J = 8.8$  Hz, 2H), 7.47–7.42 (m, 2H), 7.41–7.35 (m, 2H), 7.34–7.28 (m, 1H), 7.16 (dd,  $J = 8.3, 1.8$  Hz, 2H), 7.07 (dd,  $J = 8.8, 1.9$  Hz, 2H), 6.93 (dd,  $J = 8.2, 1.9$  Hz, 2H), 6.13 (d,  $J = 45.2$  Hz, 1H), 5.28 (dd,  $J = 9.4, 2.1$  Hz, 1H), 3.63–3.32 (m, 2H), 3.34–3.08 (m, 1H), 2.31 (s, 3H);  $^{13}\text{C NMR}$  (125.7 MHz,  $\text{CDCl}_3$ ):  $\delta$  147.5, 143.9, 143.7 (d,  $J = 21.0$  Hz), 136.2, 133.6, 123.0, 129.5, 129.4, 127.2, 126.8, 125.6 (d,  $J = 9.0$  Hz), 123.3 (d,  $J = 1.7$  Hz), 90.0 (d,  $J = 180.7$  Hz), 57.0 (d,  $J = 20.8$  Hz), 35.0, 21.4;  $^{19}\text{F NMR}$  (470.4 MHz,  $\text{CDCl}_3$ ):  $\delta$  -204.2 (dd,  $J = 45.1, 26.6$  Hz); FTIR (thin film)  $\nu$  3272 (br. m), 1607 (w), 1523 (s), 1344 (s), 1158 (s), 742 (m)  $\text{cm}^{-1}$ ; HRMS (ESI-TOF) Calc'd for  $\text{C}_{22}\text{H}_{21}\text{FN}_2\text{O}_4\text{S}_2$   $[\text{M}+\text{H}]^+$ : 461.1000; found 461.0993;  $[\alpha]_{\text{D}}^{25} = +53.2^\circ$  (c 1.0,  $\text{CH}_3\text{OH}$ ).

99% ee, Chiral HPLC (AD-H, 10% isopropanol in hexanes, 1.0 mL/min,  $\lambda = 210$  nm);  $t_{\text{R}}$ (major) = 25.2 min,  $t_{\text{R}}$ (minor) = 28.3 min.

Racemic sample:

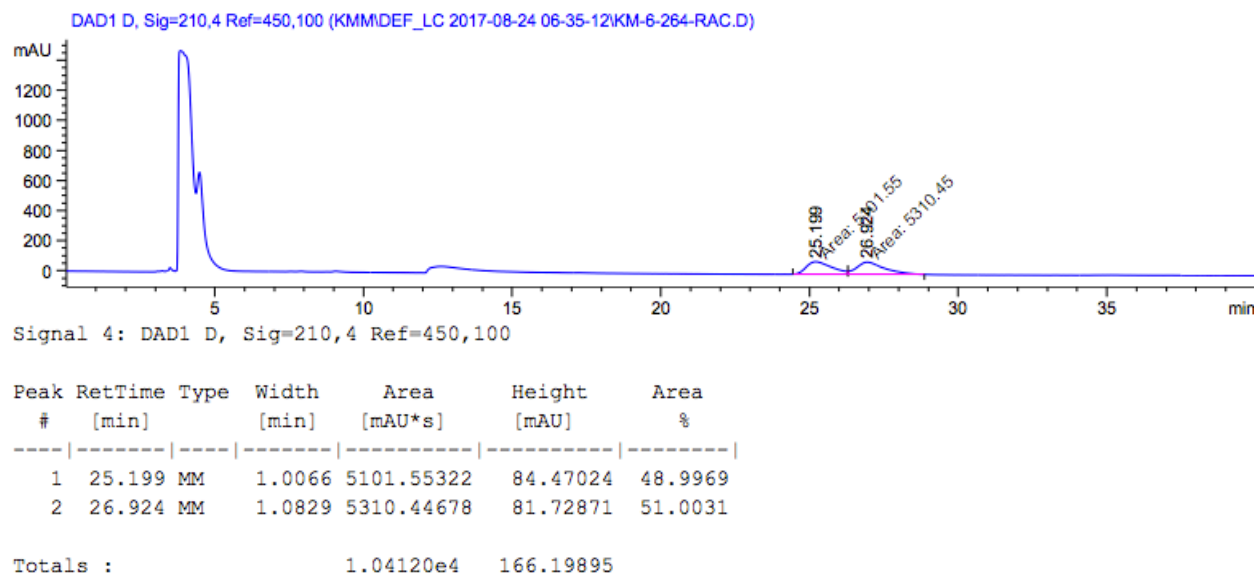

Enriched sample:

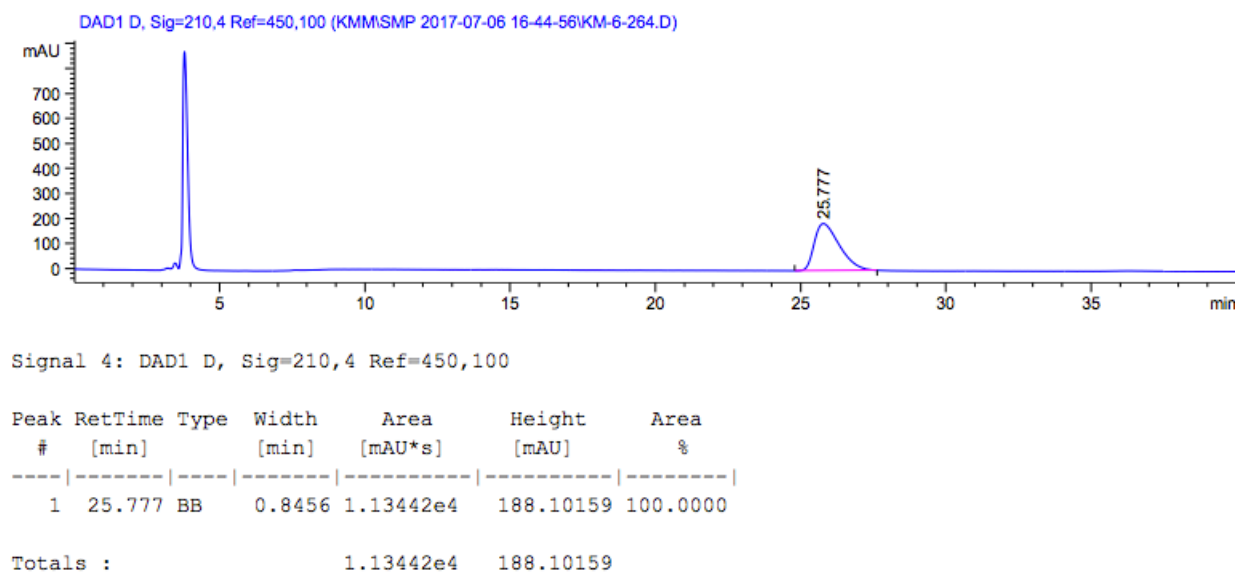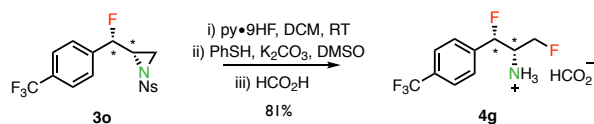

To a solution of **3o** (75.2 mg, 0.186 mmol, 1 equiv) in dichloromethane (1 mL) in a low-density polyethylene tube was added  $\text{HF}\cdot\text{pyridine}$  ( $\text{py}\cdot\text{9HF}$ , 70% hydrogen fluoride by weight, 100  $\mu\text{L}$ , 20 equiv hydrogen fluoride). The reaction mixture was stirred at room temperature for 12 hours. The heterogeneous mixture was transferred carefully into a vigorously stirred suspension of basic alumina (0.5 g) in dichloromethane at  $-78^\circ\text{C}$ . The resulting suspension was allowed to warm to room temperature and filtered, washing with 10 mL dichloromethane. The combined filtrate was concentrated under reduced pressure. The crude residue was dissolved in DMSO (0.37 mL) to which thiophenol (95.5  $\mu\text{L}$ , 0.93 mmol,

5 equiv) and potassium carbonate (129 mg, 0.93 mmol, 5 equiv) were added. The reaction mixture was stirred at room temperature. After 24 h, the crude mixture was purified by silica gel column chromatography (0% to 5% CH<sub>3</sub>OH/CH<sub>2</sub>Cl<sub>2</sub>) followed by prep HPLC (0% to 50% (0.1% HCO<sub>2</sub>H<sub>(aq)</sub>)/CH<sub>3</sub>CN) to give **4g** (43.0 mg, 81%) as a white solid. <sup>1</sup>H NMR (600 MHz, CDCl<sub>3</sub>): δ 8.01 (s, 1H), 7.69 (d, *J* = 8.0 Hz, 2H), 7.49 (d, *J* = 7.9 Hz, 2H), 5.60 (dd, *J* = 46.9, 5.2 Hz, 1H), 4.49 (dddd, *J* = 46.9, 9.5, 5.4, 1.8 Hz, 1H), 4.34 (ddd, *J* = 46.8, 9.5, 4.8 Hz, 1H), 3.38 (br. s, 1H), 3.38–3.23 (m, 1H); <sup>13</sup>C NMR (125.7 MHz, CDCl<sub>3</sub>): δ 163.8, 141.0 (d, *J* = 20.6 Hz), 131.2 (q, *J* = 32.6 Hz), 126.3 (d, *J* = 7.7 Hz), 125.8 (q, *J* = 3.8 Hz), 123.7 (q, *J* = 272.3 Hz), 93.1 (dd, *J* = 175.0, 2.8 Hz), 83.5 (dd, *J* = 171.2, 6.2 Hz), 56.4 (dd, *J* = 22.5, 19.2 Hz); <sup>19</sup>F NMR (470.4 MHz, CDCl<sub>3</sub>): δ -62.8 (s, 3H), -196.5 (dd, *J* = 47.1, 19.7 Hz, 1H), -230.4 (td, *J* = 47.1, 19.1 Hz, 1H); HRMS (ESI-TOF) Calc'd for C<sub>11</sub>H<sub>12</sub>F<sub>2</sub>NO<sub>2</sub> [M-HCO<sub>2</sub>]<sup>+</sup>: 240.0806; found 240.0807; [α]<sub>D</sub><sup>25</sup> = +13.8° (c 1.0, CH<sub>3</sub>CN).

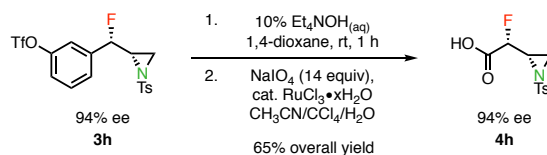

To a solution of **3h** (84.3 mg, 0.186 mmol, 1 equiv) in 1,4-dioxane (1.10 mL) was added 10% Et<sub>4</sub>NOH<sub>(aq)</sub> (0.55 mL). The reaction mixture was stirred at room temperature. After 1 h, the reaction was quenched with 1 M HCl<sub>(aq)</sub> (0.5 mL). Diethyl ether (5 mL) was added, and the aqueous and organic layers were separated. The aqueous layer was extracted with diethyl ether (3 x 5 mL), washed with brine (2 mL), dried over Na<sub>2</sub>SO<sub>4</sub>, filtered and concentrated to give a colorless oil. The crude residue was dissolved in acetonitrile (0.5 mL) and carbon tetrachloride (0.5 mL). Water (1.0 mL), sodium periodate (557 mg, 2.60 mmol, 14 equiv) and a catalytic amount of ruthenium(III) chloride hydrate were added. The reaction mixture was allowed to stir at room temperature under air. After 18 h, diethyl ether (5 mL) was added, and the aqueous and organic layers were separated. The aqueous layer was extracted with diethyl ether (3 x 5 mL), washed with brine (2 mL), dried over Na<sub>2</sub>SO<sub>4</sub>, filtered, concentrated and purified by prep HPLC (H<sub>2</sub>O/CH<sub>3</sub>CN) to give **4h** as a colorless oil (33.0 mg, 65%). <sup>1</sup>H NMR (600 MHz, CDCl<sub>3</sub>): δ 8.20–7.90 (br. s, 1H), 7.83 (d, *J* = 7.9 Hz, 2H), 7.35 (d, *J* = 7.9 Hz, 2H), 4.85 (dd, *J* = 47.4, 5.0 Hz, 1H), 3.36–3.17 (m, 1H), 2.81 (d, *J* = 7.3 Hz, 1H), 2.51 (d, *J* = 4.1 Hz, 1H), 2.45 (s, 3H); <sup>13</sup>C NMR (125.7 MHz, CDCl<sub>3</sub>): δ 170.48 (d, *J* = 25.0 Hz), 145.42, 133.98, 129.94, 128.37, 85.51 (d, *J* = 192.4 Hz), 38.93 (d, *J* = 23.5 Hz), 29.75 (d, *J* = 7.8 Hz), 21.83; <sup>19</sup>F NMR (470.4 MHz, CDCl<sub>3</sub>): δ -198.7 (d, *J* = 43.5 Hz); HRMS (ESI-TOF) Calc'd for C<sub>11</sub>H<sub>12</sub>F<sub>3</sub>NO<sub>2</sub> [M-H]<sup>+</sup>: 272.0398; found 272.0410.

## Competition between Aziridinium versus Phenonium Ion Formation.

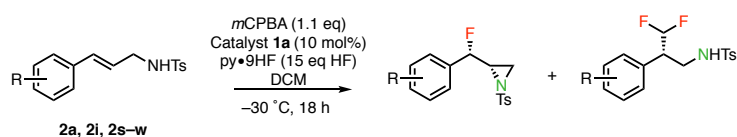

To a solution of substrate (0.104 mmol, 1 equiv) and catalyst **1a** (8.0 mg, 0.0104 mmol, 10 mol%) in dichloromethane (0.6 mL) in a low-density polyethylene tube at  $-78\text{ }^{\circ}\text{C}$  was added HF•pyridine (py•9HF, 70% hydrogen fluoride by weight, 42  $\mu\text{L}$ , 15 equiv hydrogen fluoride) followed by *m*CPBA (77% by weight, 25.6 mg, 0.114 mmol, 1.1 equiv). The reaction mixture was warmed to  $-30\text{ }^{\circ}\text{C}$  and stirred at that temperature for 16 hours. The heterogeneous mixture was transferred carefully into a vigorously stirred suspension of basic alumina (400 mg) in dichloromethane at  $-78\text{ }^{\circ}\text{C}$ . The resulting suspension was allowed to warm to room temperature and filtered, washing with 20 mL dichloromethane. The combined filtrate was concentrated under reduced pressure. The ratio of aziridine product (NHTs) to the total of aziridine and 1,1-difluoromethylated product (NHTs + Ar) was determined by  $^{19}\text{F}$  NMR analysis of the crude mixture.

| R                         | Sigma + | NHTs/(Ar + NHTs) | NHTs/Ar | log(NHTs/Ar) |            |
|---------------------------|---------|------------------|---------|--------------|------------|
| H                         | 0       | 0.052            | 0.052   | 0.05485232   | -1.260805  |
| <i>p</i> -Cl              | 0.114   | 0.146            | 0.146   | 0.17096019   | -0.767105  |
| <i>p</i> -Br              | 0.15    | 0.2              | 0.2     | 0.25         | -0.60206   |
| <i>m</i> -F               | 0.352   | 0.671            | 0.671   | 2.03951368   | 0.30952662 |
| <i>m</i> -Br              | 0.405   | 0.778            | 0.778   | 3.5045045    | 0.54462662 |
| <i>m</i> -CF <sub>3</sub> | 0.52    | 1                | 0.99    | 99           | 1.99563519 |
| <i>p</i> -CF <sub>3</sub> | 0.612   | 1                | 0.99    | 99           | 1.99563519 |

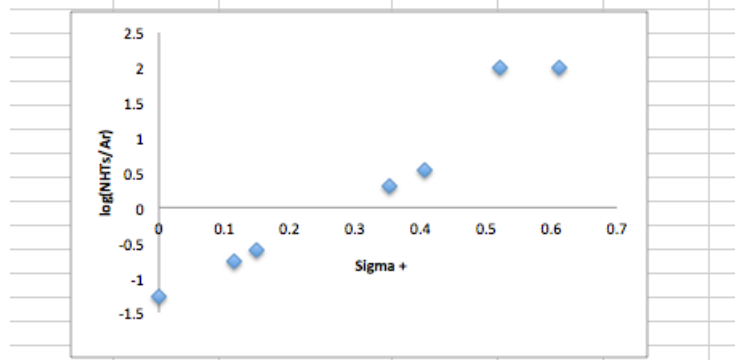

**Figure S1.** Hammett plot of the product selectivity for fluoroaziridine versus 1,1-product as a function of substituent. For the *m*-CF<sub>3</sub> and *p*-CF<sub>3</sub> derivatives, the reactions were completely selective (>99:1) for the fluoroaziridine. The points on the plot depict the lower boundaries for the value of log ([fluoroaziridine]/[1,1-product]).

**$^{19}\text{F}$  NMR**  
**145.7 Hz**  
 **$\text{CDCl}_3$**

R = H:

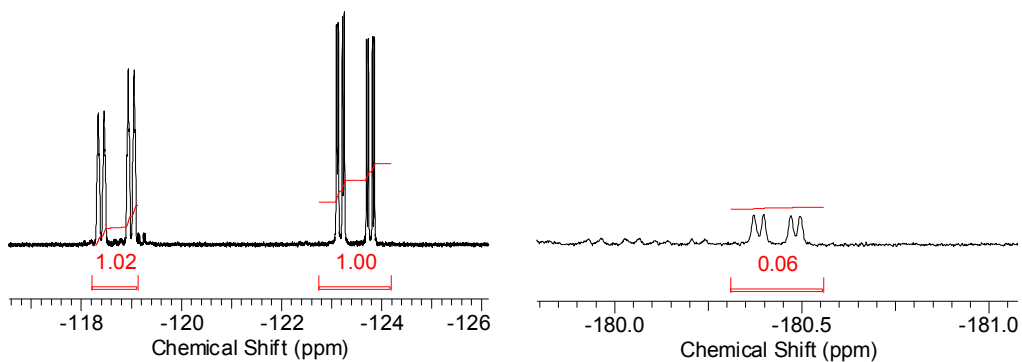

R = *p*-Cl:

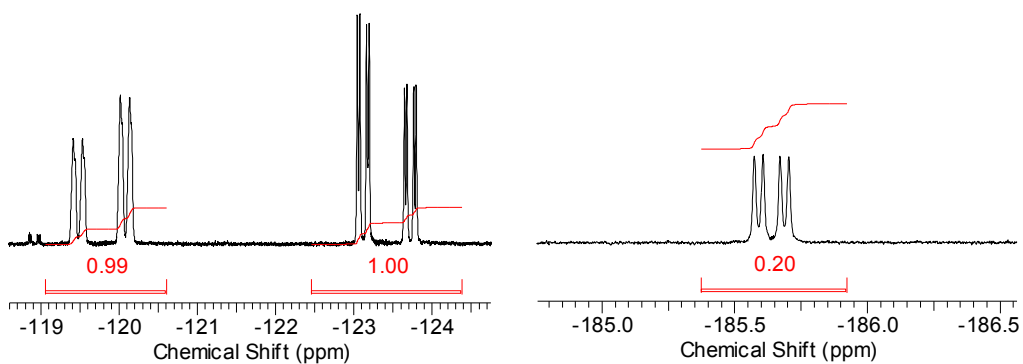

R = *p*-Br

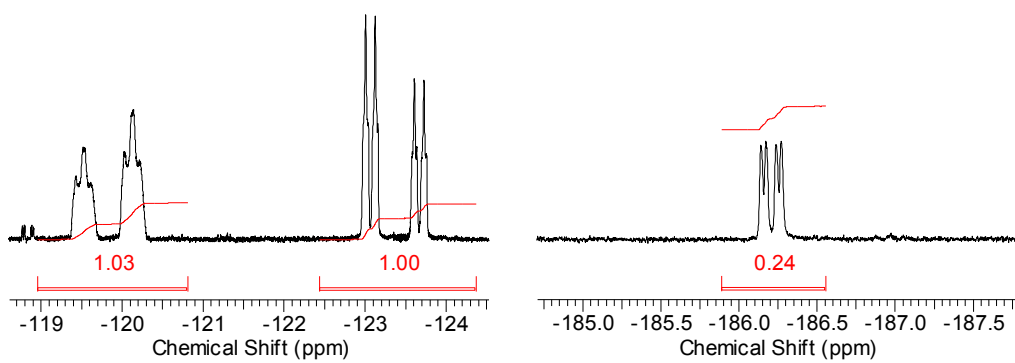

R = *m*-F

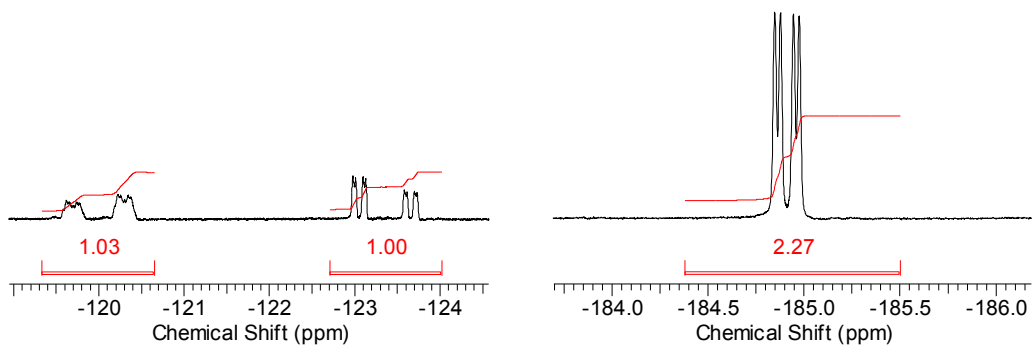

R = *m*-Br

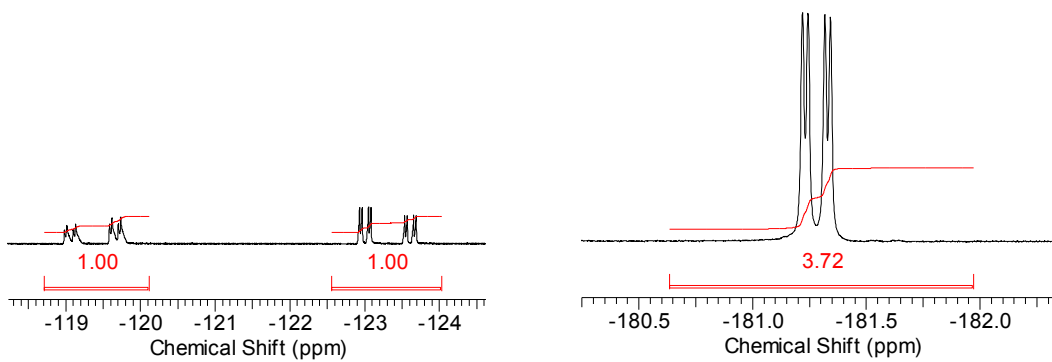

R = *m*-CF<sub>3</sub>

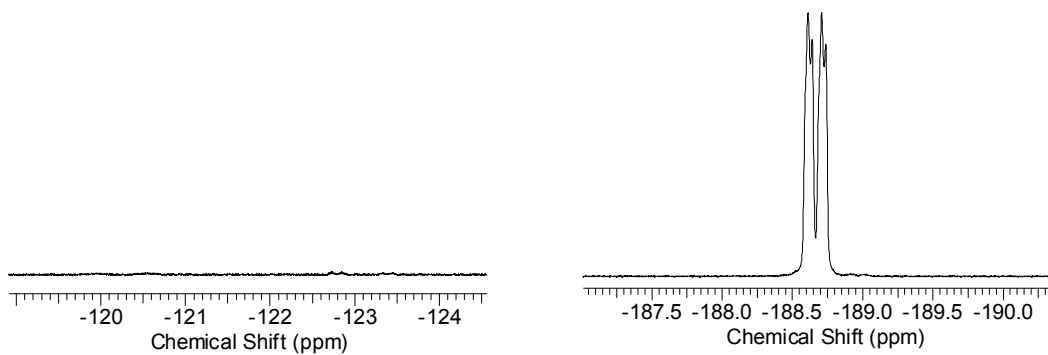

## X-ray Crystallography Information.

### X-Ray Crystallographic Information Data for 3b

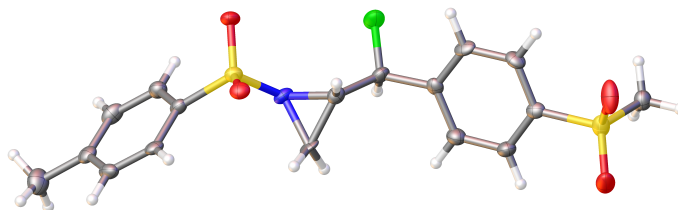

**X-Ray Crystallography:** A crystal mounted on a diffractometer was collected data at 100 K. The intensities of the reflections were collected by means of a Bruker APEX II CCD diffractometer (Mo<sub>K</sub> $\alpha$  radiation,  $\lambda=0.71073$  Å), and equipped with an Oxford Cryosystems nitrogen flow apparatus. The collection method involved  $0.5^\circ$  scans in  $\omega$  at  $28^\circ$  in  $2\theta$ . Data integration down to  $0.84$  Å resolution was carried out using SAINT V8.37A with reflection spot size optimization.<sup>11</sup> Absorption corrections were made with the program TWINABS. The structure was solved by the Intrinsic Phasing methods and refined by least-squares methods against  $F^2$  using SHELXT-2014<sup>12</sup> and SHELXL-2014<sup>13</sup> with OLEX 2 interface.<sup>14</sup> Non-hydrogen atoms were refined anisotropically, and hydrogen atoms were allowed to ride on the respective atoms. Crystal data as well as details of data collection and refinement are summarized in Table S3, and geometric parameters are shown in Table S4. The Ortep plots produced with SHELXL-2014 program, and the other drawings were produced with Accelrys DS Visualizer 2.0.<sup>15</sup>

**Table S3. Experimental details**

|                             |                                                                 |
|-----------------------------|-----------------------------------------------------------------|
| Crystal data                |                                                                 |
| Chemical formula            | C <sub>17</sub> H <sub>18</sub> FNO <sub>4</sub> S <sub>2</sub> |
| $M_r$                       | 383.44                                                          |
| Crystal system, space group | Orthorhombic, $P2_12_12_1$                                      |
| Temperature (K)             | 100                                                             |
| $a, b, c$ (Å)               | 5.5270 (4), 8.6617 (6), 36.032 (3)                              |
| $V$ (Å <sup>3</sup> )       | 1725.0 (2)                                                      |
| $Z$                         | 4                                                               |
| Radiation type              | Mo $K\alpha$                                                    |
| $\mu$ (mm <sup>-1</sup> )   | 0.34                                                            |
| Crystal size (mm)           | 0.10 × 0.02 × 0.01                                              |
| Data collection             |                                                                 |
| Diffractometer              | Bruker D8 goniometer with CCD area detector                     |
| Absorption correction       | Multi-scan<br>SADABS                                            |

|                                                                       |                                                                                                                                     |
|-----------------------------------------------------------------------|-------------------------------------------------------------------------------------------------------------------------------------|
| $T_{\min}, T_{\max}$                                                  | 0.833, 0.862                                                                                                                        |
| No. of measured, independent and observed [ $I > 2s(I)$ ] reflections | 29926, 3065, 2507                                                                                                                   |
| $R_{\text{int}}$                                                      | 0.130                                                                                                                               |
| $(\sin q/l)_{\text{max}} (\text{\AA}^{-1})$                           | 0.596                                                                                                                               |
| Refinement                                                            |                                                                                                                                     |
| $R[F^2 > 2s(F^2)], wR(F^2), S$                                        | 0.068, 0.129, 1.17                                                                                                                  |
| No. of reflections                                                    | 3065                                                                                                                                |
| No. of parameters                                                     | 228                                                                                                                                 |
| H-atom treatment                                                      | H-atom parameters constrained                                                                                                       |
| $D\rho_{\text{max}}, D\rho_{\text{min}} (e \text{\AA}^{-3})$          | 0.36, -0.45                                                                                                                         |
| Absolute structure                                                    | Flack $x$ determined using 795 quotients $[(I^+)-(I^-)]/[(I^+)+(I^-)]$ (Parsons, Flack and Wagner, Acta Cryst. B69 (2013) 249-259). |
| Absolute structure parameter                                          | 0.11 (8)                                                                                                                            |

Computer programs: *APEX3* v2016.9-0 (Bruker-AXS, 2016), *SAINT* 8.37A (Bruker-AXS, 2015), *SHELXT2014* (Sheldrick, 2015), *SHELXL2014* (Sheldrick, 2015), Bruker *SHELXTL* (Sheldrick, 2015).

**Table S4. Geometric parameters ( $\text{\AA}$ ,  $^\circ$ )**

|        |           |         |            |
|--------|-----------|---------|------------|
| S1—O2  | 1.428 (5) | C6—H6   | 0.9500     |
| S1—O1  | 1.434 (5) | C7—C8   | 1.379 (9)  |
| S1—N1  | 1.659 (6) | C8—C9   | 1.389 (9)  |
| S1—C10 | 1.743 (7) | C8—H8   | 0.9500     |
| S2—O3  | 1.428 (6) | C9—H9   | 0.9500     |
| S2—O4  | 1.438 (6) | C10—C15 | 1.387 (9)  |
| S2—C17 | 1.737 (7) | C10—C11 | 1.391 (10) |
| S2—C7  | 1.779 (7) | C11—C12 | 1.382 (10) |
| F1—C3  | 1.410 (7) | C11—H11 | 0.9500     |
| N1—C1  | 1.481 (8) | C12—C13 | 1.375 (10) |
| N1—C2  | 1.482 (8) | C12—H12 | 0.9500     |
| C1—C2  | 1.480 (9) | C13—C14 | 1.395 (10) |
| C1—H1A | 0.9900    | C13—C16 | 1.506 (10) |
| C1—H1B | 0.9900    | C14—C15 | 1.384 (9)  |
| C2—C3  | 1.504 (9) | C14—H14 | 0.9500     |
| C2—H2  | 1.0000    | C15—H15 | 0.9500     |



|            |            |             |           |
|------------|------------|-------------|-----------|
| C3—C4      | 1.505 (10) | C16—H16A    | 0.9800    |
| C3—H3      | 1.0000     | C16—H16B    | 0.9800    |
| C4—C5      | 1.381 (10) | C16—H16C    | 0.9800    |
| C4—C9      | 1.383 (9)  | C17—H17A    | 0.9800    |
| C5—C6      | 1.384 (10) | C17—H17B    | 0.9800    |
| C5—H5      | 0.9500     | C17—H17C    | 0.9800    |
| C6—C7      | 1.378 (9)  |             |           |
|            |            |             |           |
| O2—S1—O1   | 117.8 (3)  | C5—C6—H6    | 120.7     |
| O2—S1—N1   | 111.7 (3)  | C6—C7—C8    | 121.5 (6) |
| O1—S1—N1   | 104.8 (3)  | C6—C7—S2    | 118.7 (5) |
| O2—S1—C10  | 109.0 (3)  | C8—C7—S2    | 119.7 (5) |
| O1—S1—C10  | 109.6 (3)  | C7—C8—C9    | 118.9 (6) |
| N1—S1—C10  | 102.8 (3)  | C7—C8—H8    | 120.6     |
| O3—S2—O4   | 119.7 (4)  | C9—C8—H8    | 120.6     |
| O3—S2—C17  | 107.9 (4)  | C4—C9—C8    | 120.7 (6) |
| O4—S2—C17  | 109.1 (4)  | C4—C9—H9    | 119.6     |
| O3—S2—C7   | 107.8 (3)  | C8—C9—H9    | 119.6     |
| O4—S2—C7   | 107.0 (3)  | C15—C10—C11 | 120.3 (7) |
| C17—S2—C7  | 104.2 (3)  | C15—C10—S1  | 120.0 (5) |
| C1—N1—C2   | 59.9 (4)   | C11—C10—S1  | 119.6 (5) |
| C1—N1—S1   | 117.3 (5)  | C12—C11—C10 | 118.7 (7) |
| C2—N1—S1   | 114.1 (4)  | C12—C11—H11 | 120.6     |
| C2—C1—N1   | 60.1 (4)   | C10—C11—H11 | 120.6     |
| C2—C1—H1A  | 117.8      | C13—C12—C11 | 122.3 (7) |
| N1—C1—H1A  | 117.8      | C13—C12—H12 | 118.8     |
| C2—C1—H1B  | 117.8      | C11—C12—H12 | 118.8     |
| N1—C1—H1B  | 117.8      | C12—C13—C14 | 118.1 (7) |
| H1A—C1—H1B | 114.9      | C12—C13—C16 | 122.7 (7) |
| C1—C2—N1   | 60.0 (4)   | C14—C13—C16 | 119.2 (7) |
| C1—C2—C3   | 121.2 (6)  | C15—C14—C13 | 121.0 (7) |
| N1—C2—C3   | 113.4 (6)  | C15—C14—H14 | 119.5     |
| C1—C2—H2   | 116.5      | C13—C14—H14 | 119.5     |
| N1—C2—H2   | 116.5      | C14—C15—C10 | 119.6 (7) |
| C3—C2—H2   | 116.5      | C14—C15—H15 | 120.2     |

|              |            |                     |            |
|--------------|------------|---------------------|------------|
| F1—C3—C2     | 106.8 (5)  | C10—C15—H15         | 120.2      |
| F1—C3—C4     | 108.3 (6)  | C13—C16—H16A        | 109.5      |
| C2—C3—C4     | 113.2 (6)  | C13—C16—H16B        | 109.5      |
| F1—C3—H3     | 109.4      | H16A—C16—H16B       | 109.5      |
| C2—C3—H3     | 109.4      | C13—C16—H16C        | 109.5      |
| C4—C3—H3     | 109.4      | H16A—C16—H16C       | 109.5      |
| C5—C4—C9     | 119.0 (6)  | H16B—C16—H16C       | 109.5      |
| C5—C4—C3     | 118.7 (6)  | S2—C17—H17A         | 109.5      |
| C9—C4—C3     | 122.3 (6)  | S2—C17—H17B         | 109.5      |
| C4—C5—C6     | 121.4 (7)  | H17A—C17—H17B       | 109.5      |
| C4—C5—H5     | 119.3      | S2—C17—H17C         | 109.5      |
| C6—C5—H5     | 119.3      | H17A—C17—H17C       | 109.5      |
| C7—C6—C5     | 118.5 (7)  | H17B—C17—H17C       | 109.5      |
| C7—C6—H6     | 120.7      |                     |            |
|              |            |                     |            |
| O2—S1—N1—C1  | 30.2 (6)   | C17—S2—C7—C6        | 99.6 (6)   |
| O1—S1—N1—C1  | 158.9 (5)  | O3—S2—C7—C8         | 34.4 (6)   |
| C10—S1—N1—C1 | -86.5 (5)  | O4—S2—C7—C8         | 164.4 (5)  |
| O2—S1—N1—C2  | -37.0 (5)  | C17—S2—C7—C8        | -80.1 (6)  |
| O1—S1—N1—C2  | 91.6 (5)   | C6—C7—C8—C9         | -1.0 (10)  |
| C10—S1—N1—C2 | -153.8 (5) | S2—C7—C8—C9         | 178.7 (6)  |
| S1—N1—C1—C2  | -103.4 (5) | C5—C4—C9—C8         | 0.1 (10)   |
| N1—C1—C2—C3  | -100.8 (7) | C3—C4—C9—C8         | -179.1 (6) |
| S1—N1—C2—C1  | 108.8 (5)  | C7—C8—C9—C4         | 0.4 (10)   |
| C1—N1—C2—C3  | 113.7 (6)  | O2—S1—C10—C15       | -10.4 (6)  |
| S1—N1—C2—C3  | -137.5 (5) | O1—S1—C10—C15       | -140.6 (5) |
| C1—C2—C3—F1  | 142.5 (6)  | N1—S1—C10—C15       | 108.3 (6)  |
| N1—C2—C3—F1  | 74.5 (7)   | O2—S1—C10—C11       | 167.2 (5)  |
| C1—C2—C3—C4  | -98.4 (7)  | O1—S1—C10—C11       | 36.9 (7)   |
| N1—C2—C3—C4  | -166.4 (6) | N1—S1—C10—C11       | -74.1 (6)  |
| F1—C3—C4—C5  | -162.0 (6) | C15—C10—C11—<br>C12 | 0.7 (10)   |
| C2—C3—C4—C5  | 79.7 (8)   | S1—C10—C11—C12      | -176.9 (5) |
| F1—C3—C4—C9  | 17.3 (9)   | C10—C11—C12—<br>C13 | -0.2 (11)  |

|             |            |                 |            |
|-------------|------------|-----------------|------------|
| C2—C3—C4—C9 | -101.1 (7) | C11—C12—C13—C14 | -0.3 (10)  |
| C9—C4—C5—C6 | 0.0 (10)   | C11—C12—C13—C16 | -179.8 (7) |
| C3—C4—C5—C6 | 179.2 (7)  | C12—C13—C14—C15 | 0.4 (10)   |
| C4—C5—C6—C7 | -0.6 (11)  | C16—C13—C14—C15 | 179.9 (6)  |
| C5—C6—C7—C8 | 1.1 (10)   | C13—C14—C15—C10 | 0.1 (10)   |
| C5—C6—C7—S2 | -178.6 (5) | C11—C10—C15—C14 | -0.6 (10)  |
| O3—S2—C7—C6 | -145.9 (6) | S1—C10—C15—C14  | 176.9 (5)  |
| O4—S2—C7—C6 | -15.8 (7)  |                 |            |

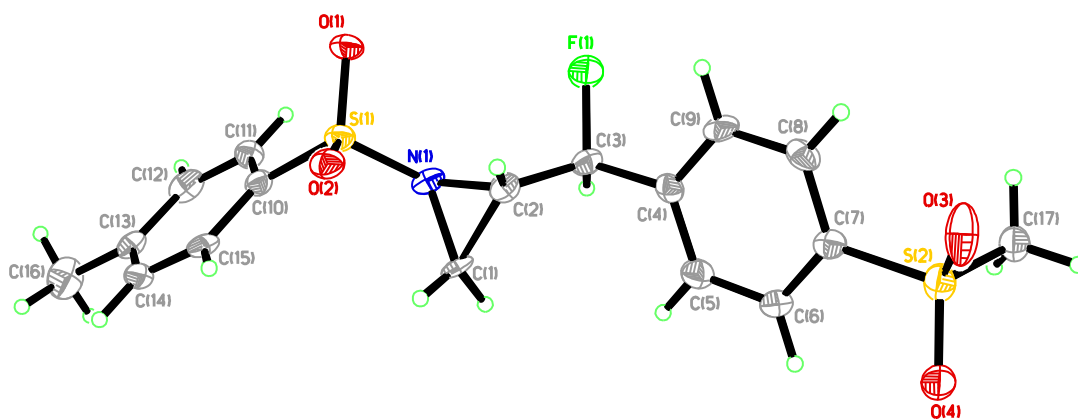

**Figure S2.** Perspective views showing 50% probability displacement

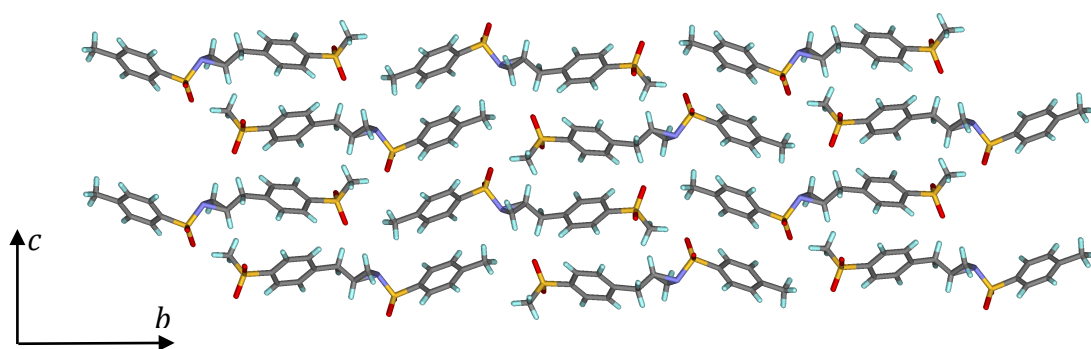

**Figure S3.** Three-dimensional supramolecular architecture viewed along the *a*-axis direction.

## X-Ray Crystallographic Information Data for 4a

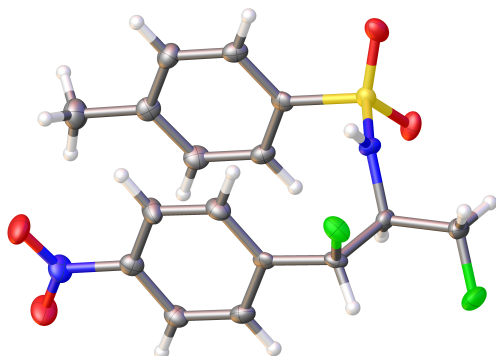

**X-ray Crystallography:** A crystal mounted on a diffractometer was collected data at 100 K. The intensities of the reflections were collected by means of a Bruker APEX II DUO CCD diffractometer (Cu $\kappa$  radiation,  $\lambda=1.54178$  Å), and equipped with an Oxford Cryosystems nitrogen flow apparatus. The collection method involved  $1.0^\circ$  scans in  $\omega$  at  $-30^\circ$ ,  $-55^\circ$ ,  $-80^\circ$ ,  $30^\circ$ ,  $55^\circ$ ,  $80^\circ$  and  $115^\circ$  in  $2\theta$ . Data integration down to  $0.84$  Å resolution was carried out using SAINT V8.37 A with reflection spot size optimization.<sup>11</sup> Absorption corrections were made with the program SADABS. The structure was solved by the Intrinsic Phasing methods and refined by least-squares methods against  $F^2$  using SHELXT-2014<sup>9</sup> and SHELXL-2014<sup>13</sup> with OLEX 2 interface.<sup>14</sup> Non-hydrogen atoms were refined anisotropically, and hydrogen atoms were allowed to ride on the respective atoms. Crystal data as well as details of data collection and refinement are summarized in Table S5, geometric parameters are shown in Table S6 and hydrogen-bond parameters are listed in Table S7. The Ortep plots produced with SHELXL-2014 program, and the other drawings were produced with Accelrys DS Visualizer 2.0.<sup>15</sup>

**Table S5. Experimental details**

|                             |                                                                                |
|-----------------------------|--------------------------------------------------------------------------------|
| Crystal data                |                                                                                |
| Chemical formula            | C <sub>16</sub> H <sub>16</sub> F <sub>2</sub> N <sub>2</sub> O <sub>4</sub> S |
| $M_r$                       | 370.37                                                                         |
| Crystal system, space group | Monoclinic, $P2_1$                                                             |
| Temperature (K)             | 100                                                                            |
| $a, b, c$ (Å)               | 13.7281 (5), 7.7633 (3), 15.1716 (5)                                           |
| $b$ (°)                     | 96.176 (2)                                                                     |
| $V$ (Å <sup>3</sup> )       | 1607.53 (10)                                                                   |
| $Z$                         | 4                                                                              |
| Radiation type              | Cu $K\alpha$                                                                   |
| $\mu$ (mm <sup>-1</sup> )   | 2.23                                                                           |
| Crystal size (mm)           | 0.24 × 0.10 × 0.01                                                             |
|                             |                                                                                |

|                                                                       |                                                                                                                                    |
|-----------------------------------------------------------------------|------------------------------------------------------------------------------------------------------------------------------------|
| Data collection                                                       |                                                                                                                                    |
| Diffractometer                                                        | Bruker D8 goniometer with CCD area detector                                                                                        |
| Absorption correction                                                 | Multi-scan<br><i>SADABS</i>                                                                                                        |
| $T_{\min}, T_{\max}$                                                  | 0.815, 0.864                                                                                                                       |
| No. of measured, independent and observed [ $I > 2s(I)$ ] reflections | 27659, 5129, 4476                                                                                                                  |
| $R_{\text{int}}$                                                      | 0.085                                                                                                                              |
| $(\sin \theta/\lambda)_{\text{max}}$ ( $\text{\AA}^{-1}$ )            | 0.595                                                                                                                              |
| Refinement                                                            |                                                                                                                                    |
| $R[F^2 > 2s(F^2)], wR(F^2), S$                                        | 0.064, 0.174, 1.14                                                                                                                 |
| No. of reflections                                                    | 5129                                                                                                                               |
| No. of parameters                                                     | 455                                                                                                                                |
| No. of restraints                                                     | 1                                                                                                                                  |
| H-atom treatment                                                      | H atoms treated by a mixture of independent and constrained refinement                                                             |
| $D\rho_{\text{max}}, D\rho_{\text{min}}$ ( $e \text{\AA}^{-3}$ )      | 0.46, -0.64                                                                                                                        |
| Absolute structure                                                    | Flack x determined using 1569 quotients $[(I^+)-(I^-)]/[(I^+)+(I^-)]$ (Parsons, Flack and Wagner, Acta Cryst. B69 (2013) 249-259). |
| Absolute structure parameter                                          | 0.01 (3)                                                                                                                           |

Computer programs: *APEX3* v2016.1-0 (Bruker-AXS, 2016), *SAINT* 8.37A (Bruker-AXS, 2015), *SHELXT2014* (Sheldrick, 2015), *SHELXL2014* (Sheldrick, 2015), Bruker *SHELXTL* (Sheldrick, 2015).

**Table S6. Geometric parameters ( $\text{\AA}$ ,  $^\circ$ )**

|        |           |        |           |
|--------|-----------|--------|-----------|
| S1—O3  | 1.425 (5) | S2—O7  | 1.431 (5) |
| S1—O4  | 1.432 (4) | S2—O8  | 1.438 (4) |
| S1—N2  | 1.606 (6) | S2—N4  | 1.618 (6) |
| S1—C10 | 1.762 (7) | S2—C30 | 1.778 (7) |
| F1—C7  | 1.418 (6) | F3—C27 | 1.414 (6) |
| F2—C9  | 1.410 (8) | F4—C29 | 1.395 (9) |
| O1—N1  | 1.245 (7) | O5—N3  | 1.233 (7) |
| O2—N1  | 1.223 (7) | O6—N3  | 1.228 (7) |
| N1—C3  | 1.463 (9) | N3—C23 | 1.468 (9) |
| N2—C8  | 1.463 (8) | N4—C28 | 1.456 (9) |

|          |            |          |            |
|----------|------------|----------|------------|
| N2—H2    | 0.8698     | N4—H4A   | 0.8575     |
| C1—C2    | 1.372 (10) | C21—C22  | 1.381 (10) |
| C1—C6    | 1.393 (9)  | C21—C26  | 1.395 (9)  |
| C1—H1    | 0.9500     | C21—H21  | 0.9500     |
| C2—C3    | 1.379 (9)  | C22—C23  | 1.382 (9)  |
| C2—H2A   | 0.9500     | C22—H22  | 0.9500     |
| C3—C4    | 1.392 (9)  | C23—C24  | 1.387 (9)  |
| C4—C5    | 1.379 (10) | C24—C25  | 1.370 (9)  |
| C4—H4    | 0.9500     | C24—H24  | 0.9500     |
| C5—C6    | 1.410 (9)  | C25—C26  | 1.401 (9)  |
| C5—H5    | 0.9500     | C25—H25  | 0.9500     |
| C6—C7    | 1.499 (9)  | C26—C27  | 1.500 (10) |
| C7—C8    | 1.507 (10) | C27—C28  | 1.525 (9)  |
| C7—H7    | 1.0000     | C27—H27  | 1.0000     |
| C8—C9    | 1.524 (9)  | C28—C29  | 1.522 (9)  |
| C8—H8    | 1.0000     | C28—H28  | 1.0000     |
| C9—H9A   | 0.9900     | C29—H29A | 0.9900     |
| C9—H9B   | 0.9900     | C29—H29B | 0.9900     |
| C10—C15  | 1.395 (9)  | C30—C31  | 1.387 (9)  |
| C10—C11  | 1.397 (9)  | C30—C35  | 1.392 (9)  |
| C11—C12  | 1.378 (10) | C31—C32  | 1.383 (10) |
| C11—H11  | 0.9500     | C31—H31  | 0.9500     |
| C12—C13  | 1.401 (9)  | C32—C33  | 1.392 (10) |
| C12—H12  | 0.9500     | C32—H32  | 0.9500     |
| C13—C14  | 1.397 (9)  | C33—C34  | 1.400 (10) |
| C13—C16  | 1.511 (10) | C33—C36  | 1.507 (10) |
| C14—C15  | 1.371 (10) | C34—C35  | 1.367 (10) |
| C14—H14  | 0.9500     | C34—H34  | 0.9500     |
| C15—H15  | 0.9500     | C35—H35  | 0.9500     |
| C16—H16A | 0.9800     | C36—H36A | 0.9800     |
| C16—H16B | 0.9800     | C36—H36B | 0.9800     |
| C16—H16C | 0.9800     | C36—H36C | 0.9800     |
|          |            |          |            |
| O3—S1—O4 | 120.2 (3)  | O7—S2—O8 | 119.8 (3)  |
| O3—S1—N2 | 106.4 (3)  | O7—S2—N4 | 107.1 (3)  |

|           |           |             |           |
|-----------|-----------|-------------|-----------|
| O4—S1—N2  | 106.4 (3) | O8—S2—N4    | 106.0 (3) |
| O3—S1—C10 | 107.5 (3) | O7—S2—C30   | 107.4 (3) |
| O4—S1—C10 | 108.0 (3) | O8—S2—C30   | 107.7 (3) |
| N2—S1—C10 | 107.8 (3) | N4—S2—C30   | 108.5 (3) |
| O2—N1—O1  | 123.3 (6) | O6—N3—O5    | 123.2 (6) |
| O2—N1—C3  | 118.5 (5) | O6—N3—C23   | 119.4 (6) |
| O1—N1—C3  | 118.3 (5) | O5—N3—C23   | 117.4 (5) |
| C8—N2—S1  | 124.7 (4) | C28—N4—S2   | 124.3 (4) |
| C8—N2—H2  | 117.9     | C28—N4—H4A  | 130.9     |
| S1—N2—H2  | 115.4     | S2—N4—H4A   | 104.3     |
| C2—C1—C6  | 120.7 (6) | C22—C21—C26 | 120.0 (6) |
| C2—C1—H1  | 119.7     | C22—C21—H21 | 120.0     |
| C6—C1—H1  | 119.7     | C26—C21—H21 | 120.0     |
| C1—C2—C3  | 119.0 (6) | C21—C22—C23 | 118.4 (6) |
| C1—C2—H2A | 120.5     | C21—C22—H22 | 120.8     |
| C3—C2—H2A | 120.5     | C23—C22—H22 | 120.8     |
| C2—C3—C4  | 122.2 (6) | C22—C23—C24 | 122.9 (7) |
| C2—C3—N1  | 118.5 (6) | C22—C23—N3  | 118.7 (6) |
| C4—C3—N1  | 119.2 (6) | C24—C23—N3  | 118.3 (6) |
| C5—C4—C3  | 118.4 (6) | C25—C24—C23 | 118.3 (6) |
| C5—C4—H4  | 120.8     | C25—C24—H24 | 120.8     |
| C3—C4—H4  | 120.8     | C23—C24—H24 | 120.8     |
| C4—C5—C6  | 120.3 (6) | C24—C25—C26 | 120.3 (6) |
| C4—C5—H5  | 119.9     | C24—C25—H25 | 119.8     |
| C6—C5—H5  | 119.9     | C26—C25—H25 | 119.8     |
| C1—C6—C5  | 119.3 (6) | C21—C26—C25 | 120.1 (7) |
| C1—C6—C7  | 121.5 (5) | C21—C26—C27 | 121.0 (6) |
| C5—C6—C7  | 119.2 (6) | C25—C26—C27 | 118.8 (6) |
| F1—C7—C6  | 108.4 (5) | F3—C27—C26  | 109.2 (5) |
| F1—C7—C8  | 106.1 (5) | F3—C27—C28  | 106.1 (5) |
| C6—C7—C8  | 115.0 (6) | C26—C27—C28 | 113.9 (6) |
| F1—C7—H7  | 109.1     | F3—C27—H27  | 109.2     |
| C6—C7—H7  | 109.1     | C26—C27—H27 | 109.2     |
| C8—C7—H7  | 109.1     | C28—C27—H27 | 109.2     |
| N2—C8—C7  | 111.2 (5) | N4—C28—C29  | 108.1 (6) |



|               |           |               |           |
|---------------|-----------|---------------|-----------|
| N2—C8—C9      | 107.3 (5) | N4—C28—C27    | 110.1 (5) |
| C7—C8—C9      | 112.1 (6) | C29—C28—C27   | 112.2 (6) |
| N2—C8—H8      | 108.7     | N4—C28—H28    | 108.8     |
| C7—C8—H8      | 108.7     | C29—C28—H28   | 108.8     |
| C9—C8—H8      | 108.7     | C27—C28—H28   | 108.8     |
| F2—C9—C8      | 107.7 (5) | F4—C29—C28    | 108.5 (6) |
| F2—C9—H9A     | 110.2     | F4—C29—H29A   | 110.0     |
| C8—C9—H9A     | 110.2     | C28—C29—H29A  | 110.0     |
| F2—C9—H9B     | 110.2     | F4—C29—H29B   | 110.0     |
| C8—C9—H9B     | 110.2     | C28—C29—H29B  | 110.0     |
| H9A—C9—H9B    | 108.5     | H29A—C29—H29B | 108.4     |
| C15—C10—C11   | 120.2 (6) | C31—C30—C35   | 121.3 (6) |
| C15—C10—S1    | 120.5 (5) | C31—C30—S2    | 118.6 (5) |
| C11—C10—S1    | 119.2 (5) | C35—C30—S2    | 120.0 (5) |
| C12—C11—C10   | 120.0 (6) | C32—C31—C30   | 118.5 (6) |
| C12—C11—H11   | 120.0     | C32—C31—H31   | 120.7     |
| C10—C11—H11   | 120.0     | C30—C31—H31   | 120.7     |
| C11—C12—C13   | 120.3 (6) | C31—C32—C33   | 121.7 (6) |
| C11—C12—H12   | 119.8     | C31—C32—H32   | 119.2     |
| C13—C12—H12   | 119.8     | C33—C32—H32   | 119.2     |
| C14—C13—C12   | 118.7 (6) | C32—C33—C34   | 117.8 (7) |
| C14—C13—C16   | 120.8 (6) | C32—C33—C36   | 121.1 (7) |
| C12—C13—C16   | 120.5 (6) | C34—C33—C36   | 121.1 (7) |
| C15—C14—C13   | 121.6 (6) | C35—C34—C33   | 121.8 (6) |
| C15—C14—H14   | 119.2     | C35—C34—H34   | 119.1     |
| C13—C14—H14   | 119.2     | C33—C34—H34   | 119.1     |
| C14—C15—C10   | 119.2 (6) | C34—C35—C30   | 118.8 (6) |
| C14—C15—H15   | 120.4     | C34—C35—H35   | 120.6     |
| C10—C15—H15   | 120.4     | C30—C35—H35   | 120.6     |
| C13—C16—H16A  | 109.5     | C33—C36—H36A  | 109.5     |
| C13—C16—H16B  | 109.5     | C33—C36—H36B  | 109.5     |
| H16A—C16—H16B | 109.5     | H36A—C36—H36B | 109.5     |
| C13—C16—H16C  | 109.5     | C33—C36—H36C  | 109.5     |
| H16A—C16—H16C | 109.5     | H36A—C36—H36C | 109.5     |
| H16B—C16—H16C | 109.5     | H36B—C36—H36C | 109.5     |

|              |            |                     |            |
|--------------|------------|---------------------|------------|
| O3—S1—N2—C8  | -157.7 (5) | O7—S2—N4—C28        | -149.4 (5) |
| O4—S1—N2—C8  | -28.4 (6)  | O8—S2—N4—C28        | -20.4 (6)  |
| C10—S1—N2—C8 | 87.3 (6)   | C30—S2—N4—C28       | 95.0 (6)   |
| C6—C1—C2—C3  | 0.7 (11)   | C26—C21—C22—<br>C23 | 1.0 (11)   |
| C1—C2—C3—C4  | -2.8 (11)  | C21—C22—C23—<br>C24 | -1.0 (12)  |
| C1—C2—C3—N1  | 175.8 (6)  | C21—C22—C23—N3      | -178.0 (6) |
| O2—N1—C3—C2  | 169.3 (7)  | O6—N3—C23—C22       | 163.0 (8)  |
| O1—N1—C3—C2  | -10.8 (10) | O5—N3—C23—C22       | -18.4 (11) |
| O2—N1—C3—C4  | -12.1 (10) | O6—N3—C23—C24       | -14.1 (11) |
| O1—N1—C3—C4  | 167.8 (7)  | O5—N3—C23—C24       | 164.4 (7)  |
| C2—C3—C4—C5  | 2.5 (11)   | C22—C23—C24—<br>C25 | 0.3 (12)   |
| N1—C3—C4—C5  | -176.0 (6) | N3—C23—C24—C25      | 177.3 (7)  |
| C3—C4—C5—C6  | -0.3 (11)  | C23—C24—C25—<br>C26 | 0.3 (11)   |
| C2—C1—C6—C5  | 1.5 (10)   | C22—C21—C26—<br>C25 | -0.4 (11)  |
| C2—C1—C6—C7  | -179.4 (6) | C22—C21—C26—<br>C27 | 179.0 (7)  |
| C4—C5—C6—C1  | -1.7 (10)  | C24—C25—C26—<br>C21 | -0.3 (11)  |
| C4—C5—C6—C7  | 179.2 (6)  | C24—C25—C26—<br>C27 | -179.7 (7) |
| C1—C6—C7—F1  | 32.5 (9)   | C21—C26—C27—F3      | 24.0 (9)   |
| C5—C6—C7—F1  | -148.4 (6) | C25—C26—C27—F3      | -156.6 (6) |
| C1—C6—C7—C8  | -86.0 (7)  | C21—C26—C27—<br>C28 | -94.4 (7)  |
| C5—C6—C7—C8  | 93.1 (7)   | C25—C26—C27—<br>C28 | 85.0 (8)   |
| S1—N2—C8—C7  | -133.3 (5) | S2—N4—C28—C29       | 104.5 (6)  |
| S1—N2—C8—C9  | 103.8 (6)  | S2—N4—C28—C27       | -132.7 (5) |
| F1—C7—C8—N2  | -52.4 (7)  | F3—C27—C28—N4       | -54.6 (7)  |
| C6—C7—C8—N2  | 67.3 (6)   | C26—C27—C28—N4      | 65.6 (7)   |
| F1—C7—C8—C9  | 67.7 (6)   | F3—C27—C28—C29      | 65.8 (7)   |
| C6—C7—C8—C9  | -172.5 (5) | C26—C27—C28—        | -174.0 (5) |

|                     |            |                     |            |
|---------------------|------------|---------------------|------------|
|                     |            | C29                 |            |
| N2—C8—C9—F2         | -179.7 (5) | N4—C28—C29—F4       | -177.2 (5) |
| C7—C8—C9—F2         | 57.9 (6)   | C27—C28—C29—F4      | 61.2 (7)   |
| O3—S1—C10—C15       | 162.7 (6)  | O7—S2—C30—C31       | -21.2 (6)  |
| O4—S1—C10—C15       | 31.6 (7)   | O8—S2—C30—C31       | -151.5 (5) |
| N2—S1—C10—C15       | -83.0 (6)  | N4—S2—C30—C31       | 94.2 (6)   |
| O3—S1—C10—C11       | -18.9 (6)  | O7—S2—C30—C35       | 158.6 (5)  |
| O4—S1—C10—C11       | -150.0 (5) | O8—S2—C30—C35       | 28.3 (7)   |
| N2—S1—C10—C11       | 95.4 (6)   | N4—S2—C30—C35       | -86.0 (6)  |
| C15—C10—C11—<br>C12 | 1.0 (10)   | C35—C30—C31—<br>C32 | -1.1 (10)  |
| S1—C10—C11—C12      | -177.3 (5) | S2—C30—C31—C32      | 178.7 (5)  |
| C10—C11—C12—<br>C13 | -0.2 (10)  | C30—C31—C32—<br>C33 | 0.1 (11)   |
| C11—C12—C13—<br>C14 | -0.4 (11)  | C31—C32—C33—<br>C34 | 0.5 (11)   |
| C11—C12—C13—<br>C16 | 179.4 (7)  | C31—C32—C33—<br>C36 | -178.1 (7) |
| C12—C13—C14—<br>C15 | 0.1 (11)   | C32—C33—C34—<br>C35 | -0.1 (11)  |
| C16—C13—C14—<br>C15 | -179.7 (7) | C36—C33—C34—<br>C35 | 178.4 (7)  |
| C13—C14—C15—<br>C10 | 0.7 (11)   | C33—C34—C35—<br>C30 | -0.8 (11)  |
| C11—C10—C15—<br>C14 | -1.3 (10)  | C31—C30—C35—<br>C34 | 1.4 (11)   |
| S1—C10—C15—C14      | 177.0 (5)  | S2—C30—C35—C34      | -178.4 (6) |

**Table S7. Hydrogen-bond parameters**

| $D-H\cdots A$                   | $D-H$ (Å) | $H\cdots A$ (Å) | $D\cdots A$ (Å) | $D-H\cdots A$ (°) |
|---------------------------------|-----------|-----------------|-----------------|-------------------|
| N2—H2 $\cdots$ O8               | 0.87      | 2.13            | 2.968 (6)       | 161.7             |
| N4—H4A $\cdots$ O1 <sup>i</sup> | 0.86      | 2.24            | 3.086 (7)       | 171.4             |

Symmetry code(s): (i)  $-x+1, y+1/2, -z$ .

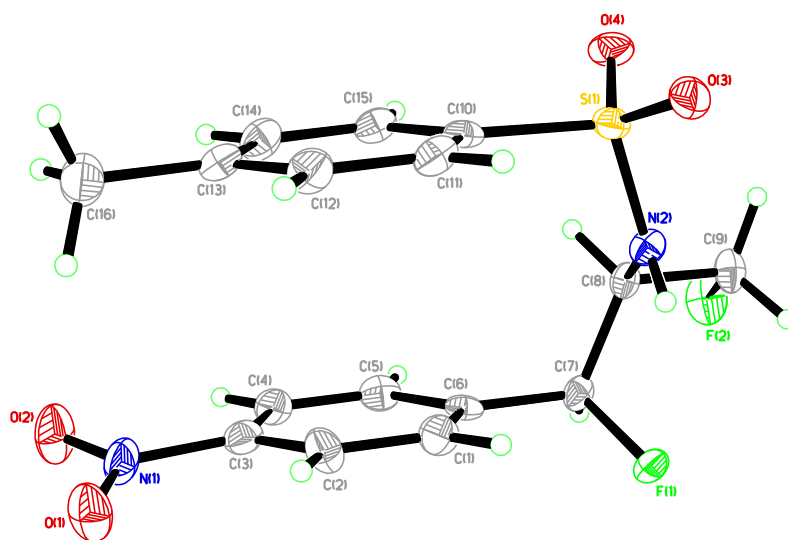

**Figure S4.** Perspective views showing 50% probability displacement

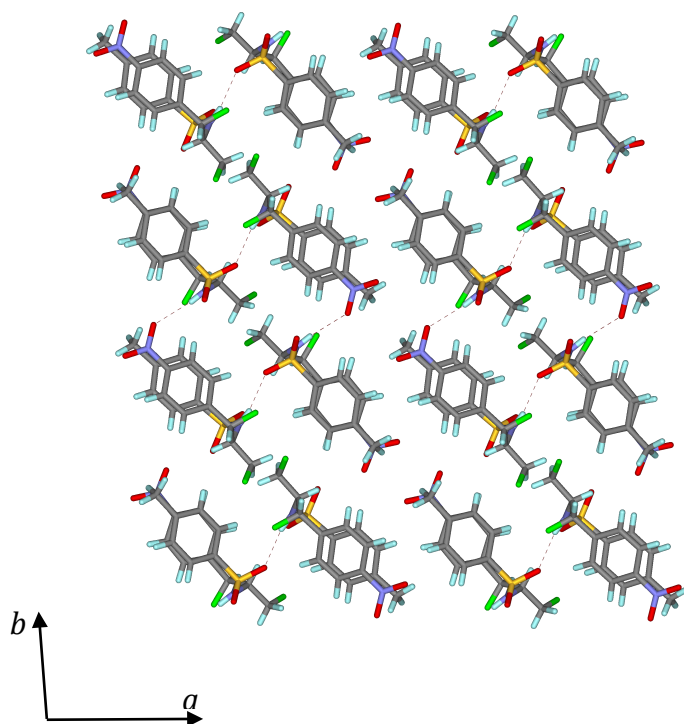

**Figure S5.** Three-dimensional supramolecular architecture viewed along the  $c$ -axis direction.

## X-Ray Crystallographic Information Data for 6a(*anti*)

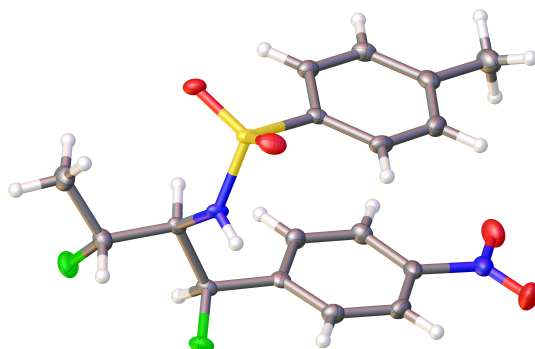

**X-ray Crystallography:** A crystal mounted on a diffractometer was collected data at 100 K. The intensities of the reflections were collected by means of a Bruker APEX II CCD diffractometer (Mo<sub>K</sub> $\alpha$  radiation,  $\lambda=0.71073$  Å), and equipped with an Oxford Cryosystems nitrogen flow apparatus. The collection method involved  $0.5^\circ$  scans in  $\omega$  at  $28^\circ$  in  $2\theta$ . Data integration down to  $0.78$  Å resolution was carried out using SAINT V8.37A with reflection spot size optimization.<sup>11</sup> Absorption corrections were made with the program SADABS. The structure was solved by the Intrinsic Phasing methods and refined by least-squares methods again  $F^2$  using SHELXT-2014<sup>9</sup> and SHELXL-2014<sup>13</sup> with OLEX 2 interface.<sup>14</sup> Non-hydrogen atoms were refined anisotropically, and hydrogen atoms were allowed to ride on the respective atoms. Crystal data as well as details of data collection and refinement are summarized in Table S8, geometric parameters are shown in Table S9 and hydrogen-bond parameters are listed in Table S10. The Ortep plots produced with SHELXL-2014 program, and the other drawings were produced with Accelrys DS Visualizer 2.0.<sup>15</sup>

**Table S8. Experimental details**

|                             |                                                                                |
|-----------------------------|--------------------------------------------------------------------------------|
| Crystal data                |                                                                                |
| Chemical formula            | C <sub>17</sub> H <sub>18</sub> F <sub>2</sub> N <sub>2</sub> O <sub>4</sub> S |
| $M_r$                       | 384.39                                                                         |
| Crystal system, space group | Orthorhombic, $P2_12_12_1$                                                     |
| Temperature (K)             | 100                                                                            |
| $a, b, c$ (Å)               | 7.5617 (3), 9.7752 (5), 23.9131 (10)                                           |
| $V$ (Å <sup>3</sup> )       | 1767.59 (14)                                                                   |
| $Z$                         | 4                                                                              |
| Radiation type              | Mo $K\alpha$                                                                   |
| $\mu$ (mm <sup>-1</sup> )   | 0.23                                                                           |
| Crystal size (mm)           | 0.18 × 0.14 × 0.10                                                             |
| Data collection             |                                                                                |
| Diffractometer              | Bruker D8 goniometer with CCD area detector                                    |

|                                                                       |                                                                                                                                    |
|-----------------------------------------------------------------------|------------------------------------------------------------------------------------------------------------------------------------|
| Absorption correction                                                 | Multi-scan<br><i>SADABS</i>                                                                                                        |
| $T_{\min}, T_{\max}$                                                  | 0.809, 0.862                                                                                                                       |
| No. of measured, independent and observed [ $I > 2s(I)$ ] reflections | 22510, 3906, 3600                                                                                                                  |
| $R_{\text{int}}$                                                      | 0.032                                                                                                                              |
| $(\sin \theta/\lambda)_{\text{max}}$ ( $\text{\AA}^{-1}$ )            | 0.642                                                                                                                              |
| Refinement                                                            |                                                                                                                                    |
| $R[F^2 > 2s(F^2)], wR(F^2), S$                                        | 0.032, 0.075, 1.06                                                                                                                 |
| No. of reflections                                                    | 3906                                                                                                                               |
| No. of parameters                                                     | 241                                                                                                                                |
| H-atom treatment                                                      | H atoms treated by a mixture of independent and constrained refinement                                                             |
| $D\rho_{\text{max}}, D\rho_{\text{min}}$ ( $\text{e \AA}^{-3}$ )      | 0.33, -0.33                                                                                                                        |
| Absolute structure                                                    | Flack x determined using 1437 quotients $[(I^+)-(I^-)]/[(I^+)+(I^-)]$ (Parsons, Flack and Wagner, Acta Cryst. B69 (2013) 249-259). |
| Absolute structure parameter                                          | -0.01 (2)                                                                                                                          |

Computer programs: *APEX3* v2016.9-0 (Bruker-AXS, 2016), *SAINT* 8.37A (Bruker-AXS, 2015), *SHELXT2014* (Sheldrick, 2015), *SHELXL2014* (Sheldrick, 2015), Bruker *SHELXTL* (Sheldrick, 2015).

**Table S9. Geometric parameters ( $\text{\AA}$ ,  $^\circ$ )**

|        |             |          |           |
|--------|-------------|----------|-----------|
| S1—O3  | 1.4320 (17) | C7—H7    | 1.0000    |
| S1—O4  | 1.4388 (16) | C8—C9    | 1.534 (3) |
| S1—N2  | 1.6108 (18) | C8—H8    | 1.0000    |
| S1—C11 | 1.765 (2)   | C9—C10   | 1.505 (3) |
| F1—C7  | 1.415 (2)   | C9—H9    | 1.0000    |
| F2—C9  | 1.405 (3)   | C10—H10A | 0.9800    |
| O1—N1  | 1.229 (3)   | C10—H10B | 0.9800    |
| O2—N1  | 1.228 (3)   | C10—H10C | 0.9800    |
| N1—C3  | 1.469 (3)   | C11—C12  | 1.392 (3) |
| N2—C8  | 1.453 (3)   | C11—C16  | 1.393 (3) |
| N2—H2  | 0.83 (3)    | C12—C13  | 1.383 (4) |
| C1—C2  | 1.374 (3)   | C12—H12  | 0.9500    |
| C1—C6  | 1.397 (3)   | C13—C14  | 1.395 (4) |

|           |             |               |             |
|-----------|-------------|---------------|-------------|
| C1—H1     | 0.9500      | C13—H13       | 0.9500      |
| C2—C3     | 1.385 (3)   | C14—C15       | 1.395 (3)   |
| C2—H2A    | 0.9500      | C14—C17       | 1.509 (4)   |
| C3—C4     | 1.378 (4)   | C15—C16       | 1.387 (3)   |
| C4—C5     | 1.389 (3)   | C15—H15       | 0.9500      |
| C4—H4     | 0.9500      | C16—H16       | 0.9500      |
| C5—C6     | 1.389 (3)   | C17—H17A      | 0.9800      |
| C5—H5     | 0.9500      | C17—H17B      | 0.9800      |
| C6—C7     | 1.504 (3)   | C17—H17C      | 0.9800      |
| C7—C8     | 1.528 (3)   |               |             |
|           |             |               |             |
| O3—S1—O4  | 119.99 (10) | N2—C8—H8      | 108.8       |
| O3—S1—N2  | 104.82 (10) | C7—C8—H8      | 108.8       |
| O4—S1—N2  | 107.62 (10) | C9—C8—H8      | 108.8       |
| O3—S1—C11 | 108.22 (11) | F2—C9—C10     | 108.1 (2)   |
| O4—S1—C11 | 106.10 (10) | F2—C9—C8      | 107.10 (18) |
| N2—S1—C11 | 109.91 (10) | C10—C9—C8     | 115.0 (2)   |
| O2—N1—O1  | 123.5 (2)   | F2—C9—H9      | 108.8       |
| O2—N1—C3  | 118.2 (2)   | C10—C9—H9     | 108.8       |
| O1—N1—C3  | 118.3 (2)   | C8—C9—H9      | 108.8       |
| C8—N2—S1  | 124.67 (15) | C9—C10—H10A   | 109.5       |
| C8—N2—H2  | 119.2 (19)  | C9—C10—H10B   | 109.5       |
| S1—N2—H2  | 114.0 (18)  | H10A—C10—H10B | 109.5       |
| C2—C1—C6  | 120.3 (2)   | C9—C10—H10C   | 109.5       |
| C2—C1—H1  | 119.9       | H10A—C10—H10C | 109.5       |
| C6—C1—H1  | 119.9       | H10B—C10—H10C | 109.5       |
| C1—C2—C3  | 118.5 (2)   | C12—C11—C16   | 120.8 (2)   |
| C1—C2—H2A | 120.8       | C12—C11—S1    | 119.42 (17) |
| C3—C2—H2A | 120.8       | C16—C11—S1    | 119.73 (18) |
| C4—C3—C2  | 122.7 (2)   | C13—C12—C11   | 119.1 (2)   |
| C4—C3—N1  | 119.0 (2)   | C13—C12—H12   | 120.5       |
| C2—C3—N1  | 118.2 (2)   | C11—C12—H12   | 120.5       |
| C3—C4—C5  | 118.2 (2)   | C12—C13—C14   | 121.4 (2)   |
| C3—C4—H4  | 120.9       | C12—C13—H13   | 119.3       |
| C5—C4—H4  | 120.9       | C14—C13—H13   | 119.3       |

|              |             |                     |              |
|--------------|-------------|---------------------|--------------|
| C4—C5—C6     | 120.2 (2)   | C15—C14—C13         | 118.6 (2)    |
| C4—C5—H5     | 119.9       | C15—C14—C17         | 120.5 (2)    |
| C6—C5—H5     | 119.9       | C13—C14—C17         | 120.9 (2)    |
| C5—C6—C1     | 120.0 (2)   | C16—C15—C14         | 121.0 (2)    |
| C5—C6—C7     | 121.7 (2)   | C16—C15—H15         | 119.5        |
| C1—C6—C7     | 118.2 (2)   | C14—C15—H15         | 119.5        |
| F1—C7—C6     | 108.65 (18) | C15—C16—C11         | 119.2 (2)    |
| F1—C7—C8     | 106.70 (17) | C15—C16—H16         | 120.4        |
| C6—C7—C8     | 114.91 (18) | C11—C16—H16         | 120.4        |
| F1—C7—H7     | 108.8       | C14—C17—H17A        | 109.5        |
| C6—C7—H7     | 108.8       | C14—C17—H17B        | 109.5        |
| C8—C7—H7     | 108.8       | H17A—C17—H17B       | 109.5        |
| N2—C8—C7     | 110.47 (18) | C14—C17—H17C        | 109.5        |
| N2—C8—C9     | 108.84 (18) | H17A—C17—H17C       | 109.5        |
| C7—C8—C9     | 110.97 (18) | H17B—C17—H17C       | 109.5        |
|              |             |                     |              |
| O3—S1—N2—C8  | 170.18 (18) | C6—C7—C8—N2         | -57.0 (2)    |
| O4—S1—N2—C8  | 41.4 (2)    | F1—C7—C8—C9         | -57.3 (2)    |
| C11—S1—N2—C8 | -73.7 (2)   | C6—C7—C8—C9         | -177.83 (19) |
| C6—C1—C2—C3  | -0.3 (4)    | N2—C8—C9—F2         | -170.71 (18) |
| C1—C2—C3—C4  | -1.6 (4)    | C7—C8—C9—F2         | -48.9 (2)    |
| C1—C2—C3—N1  | 178.0 (2)   | N2—C8—C9—C10        | 69.1 (2)     |
| O2—N1—C3—C4  | -2.6 (3)    | C7—C8—C9—C10        | -169.1 (2)   |
| O1—N1—C3—C4  | 177.1 (2)   | O3—S1—C11—C12       | 35.1 (2)     |
| O2—N1—C3—C2  | 177.8 (2)   | O4—S1—C11—C12       | 165.13 (18)  |
| O1—N1—C3—C2  | -2.5 (3)    | N2—S1—C11—C12       | -78.8 (2)    |
| C2—C3—C4—C5  | 1.8 (4)     | O3—S1—C11—C16       | -142.08 (18) |
| N1—C3—C4—C5  | -177.8 (2)  | O4—S1—C11—C16       | -12.1 (2)    |
| C3—C4—C5—C6  | -0.1 (4)    | N2—S1—C11—C16       | 103.99 (19)  |
| C4—C5—C6—C1  | -1.8 (4)    | C16—C11—C12—<br>C13 | -0.2 (3)     |
| C4—C5—C6—C7  | 175.9 (2)   | S1—C11—C12—C13      | -177.43 (19) |
| C2—C1—C6—C5  | 2.0 (4)     | C11—C12—C13—<br>C14 | -0.2 (4)     |
| C2—C1—C6—C7  | -175.8 (2)  | C12—C13—C14—<br>C15 | 0.3 (4)      |



|             |              |                 |             |
|-------------|--------------|-----------------|-------------|
| C5—C6—C7—F1 | -14.4 (3)    | C12—C13—C14—C17 | -178.7 (2)  |
| C1—C6—C7—F1 | 163.30 (19)  | C13—C14—C15—C16 | 0.0 (4)     |
| C5—C6—C7—C8 | 105.0 (2)    | C17—C14—C15—C16 | 179.0 (2)   |
| C1—C6—C7—C8 | -77.3 (3)    | C14—C15—C16—C11 | -0.4 (3)    |
| S1—N2—C8—C7 | 129.16 (18)  | C12—C11—C16—C15 | 0.6 (3)     |
| S1—N2—C8—C9 | -108.77 (19) | S1—C11—C16—C15  | 177.74 (18) |
| F1—C7—C8—N2 | 63.5 (2)     |                 |             |

**Table S10. Hydrogen-bond parameters**

| $D-H\cdots A$      | $D-H$ (Å) | $H\cdots A$ (Å) | $D\cdots A$ (Å) | $D-H\cdots A$ (°) |
|--------------------|-----------|-----------------|-----------------|-------------------|
| $N2-H2\cdots O4^i$ | 0.83 (3)  | 2.08 (3)        | 2.903 (2)       | 169 (3)           |

Symmetry code(s): (i)  $-x+1, y+1/2, -z+1/2$ .

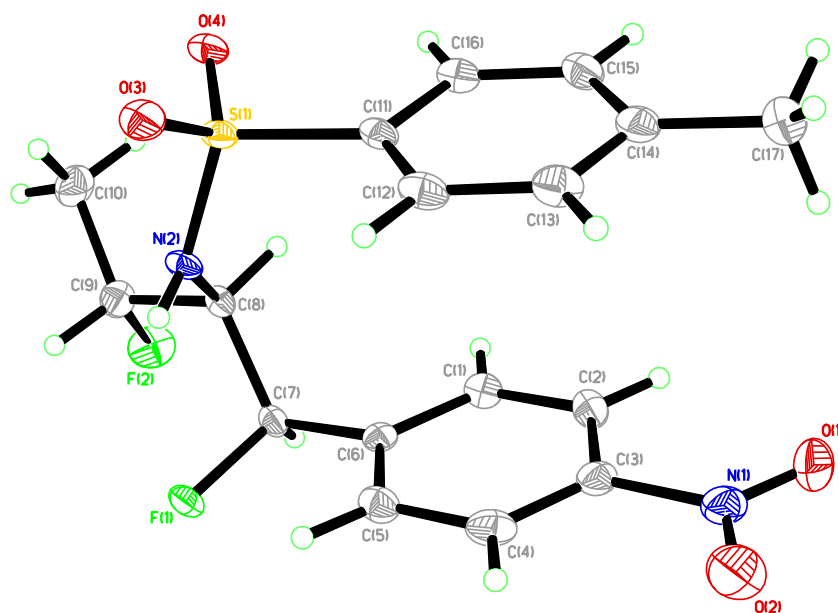

**Figure S6.** Perspective views showing 50% probability displacement

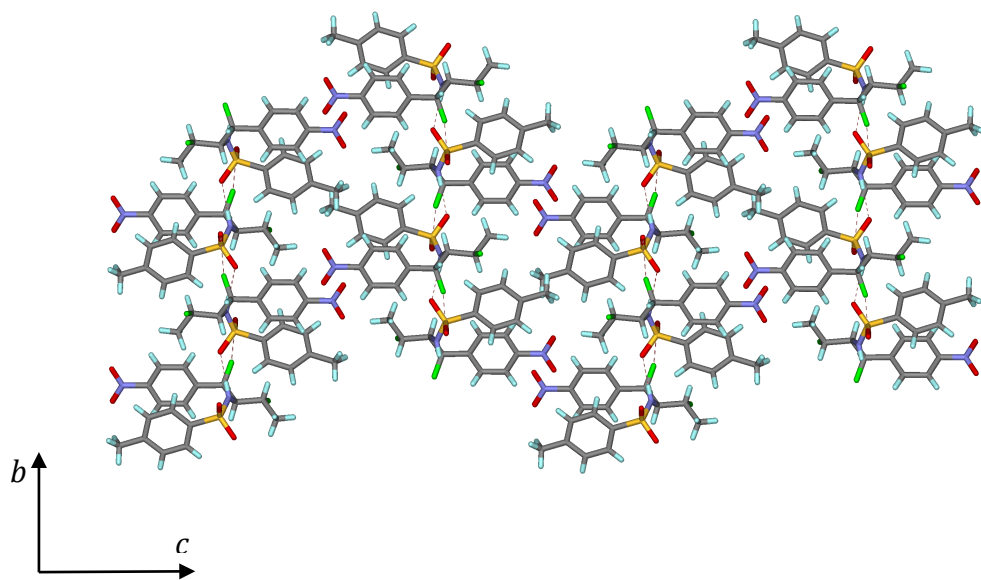

**Figure S7.** Three-dimensional supramolecular architecture viewed along the *a*-axis direction.

## X-Ray Crystallographic Information Data for 6a(*syn*)

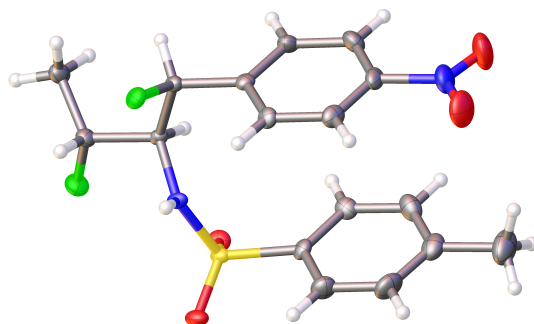

**X-ray Crystallography:** A crystal mounted on a diffractometer was collected data at 100 K. The intensities of the reflections were collected by means of a Bruker APEX II CCD diffractometer ( $\text{MoK}_\alpha$  radiation,  $\lambda=0.71073 \text{ \AA}$ ), and equipped with an Oxford Cryosystems nitrogen flow apparatus. The collection method involved  $0.5^\circ$  scans in  $\omega$  at  $28^\circ$  in  $2\theta$ . Data integration down to  $0.78 \text{ \AA}$  resolution was carried out using SAINT V8.37A with reflection spot size optimization.<sup>11</sup> Absorption corrections were made with the program SADABS. The structure was solved by the Intrinsic Phasing methods and refined by least-squares methods against  $F^2$  using SHELXT-2014<sup>12</sup> and SHELXL-2014<sup>13</sup> with OLEX 2 interface.<sup>14</sup> Non-hydrogen atoms were refined anisotropically, and hydrogen atoms were allowed to ride on the respective atoms. Crystal data as well as details of data collection and refinement are summarized in Table S11, geometric parameters are shown in Table S12, and hydrogen bond parameters are listed in Table S13. The Ortep plots produced with SHELXL-2014 program, and the other drawings were produced with Accelrys DS Visualizer 2.0.<sup>15</sup>

**Table S11. Experimental details**

|                             |                                                                    |
|-----------------------------|--------------------------------------------------------------------|
| Crystal data                |                                                                    |
| Chemical formula            | $\text{C}_{17}\text{H}_{18}\text{F}_2\text{N}_2\text{O}_4\text{S}$ |
| $M_r$                       | 384.39                                                             |
| Crystal system, space group | Monoclinic, $P2_1$                                                 |
| Temperature (K)             | 100                                                                |
| $a, b, c$ ( $\text{\AA}$ )  | 7.8163 (5), 9.2956 (6), 12.4965 (8)                                |
| $b$ ( $^\circ$ )            | 98.9206 (10)                                                       |
| $V$ ( $\text{\AA}^3$ )      | 896.98 (10)                                                        |
| $Z$                         | 2                                                                  |
| Radiation type              | Mo $K\alpha$                                                       |
| $\mu$ ( $\text{mm}^{-1}$ )  | 0.23                                                               |
| Crystal size (mm)           | $0.24 \times 0.18 \times 0.15$                                     |
| Data collection             |                                                                    |
| Diffractometer              | Bruker D8 goniometer with CCD area detector                        |

|                                                                       |                                                                                                                              |
|-----------------------------------------------------------------------|------------------------------------------------------------------------------------------------------------------------------|
| Absorption correction                                                 | Multi-scan<br><i>SADABS</i>                                                                                                  |
| $T_{\min}, T_{\max}$                                                  | 0.760, 0.801                                                                                                                 |
| No. of measured, independent and observed [ $I > 2s(I)$ ] reflections | 18368, 3934, 3786                                                                                                            |
| $R_{\text{int}}$                                                      | 0.039                                                                                                                        |
| $(\sin \theta/\lambda)_{\text{max}}$ ( $\text{\AA}^{-1}$ )            | 0.641                                                                                                                        |
| Refinement                                                            |                                                                                                                              |
| $R[F^2 > 2s(F^2)], wR(F^2), S$                                        | 0.030, 0.078, 1.04                                                                                                           |
| No. of reflections                                                    | 3934                                                                                                                         |
| No. of parameters                                                     | 241                                                                                                                          |
| No. of restraints                                                     | 1                                                                                                                            |
| H-atom treatment                                                      | H atoms treated by a mixture of independent and constrained refinement                                                       |
| $D\rho_{\text{max}}, D\rho_{\text{min}}$ ( $\text{e \AA}^{-3}$ )      | 0.35, -0.20                                                                                                                  |
| Absolute structure                                                    | Flack x determined using 1695 quotients [(I+)-(I-)]/[(I+)+(I-)] (Parsons, Flack and Wagner, Acta Cryst. B69 (2013) 249-259). |
| Absolute structure parameter                                          | 0.04 (3)                                                                                                                     |

Computer programs: *APEX3* v2016.9-0 (Bruker-AXS, 2016), *SAINT* 8.37A (Bruker-AXS, 2015), *SHELXT2014* (Sheldrick, 2015), *SHELXL2014* (Sheldrick, 2015), Bruker *SHELXTL* (Sheldrick, 2015).

**Table S12. Geometric parameters ( $\text{\AA}$ ,  $^\circ$ )**

|        |             |          |           |
|--------|-------------|----------|-----------|
| S1—O4  | 1.4376 (19) | C7—H7    | 1.0000    |
| S1—O3  | 1.4402 (19) | C8—C9    | 1.533 (3) |
| S1—N2  | 1.603 (2)   | C8—H8    | 1.0000    |
| S1—C13 | 1.771 (3)   | C9—C10   | 1.495 (4) |
| F1—C7  | 1.414 (3)   | C9—H9    | 1.0000    |
| F2—C9  | 1.408 (3)   | C10—H10A | 0.9800    |
| O1—N1  | 1.226 (4)   | C10—H10B | 0.9800    |
| O2—N1  | 1.238 (4)   | C10—H10C | 0.9800    |
| N1—C3  | 1.476 (3)   | C11—C12  | 1.381 (4) |
| N2—C8  | 1.458 (3)   | C11—C16  | 1.390 (5) |
| N2—H2  | 0.79 (3)    | C11—H11  | 0.9500    |
| C1—C2  | 1.384 (4)   | C12—C13  | 1.397 (4) |

|           |             |               |             |
|-----------|-------------|---------------|-------------|
| C1—C6     | 1.390 (4)   | C12—H12       | 0.9500      |
| C1—H1     | 0.9500      | C13—C14       | 1.394 (4)   |
| C2—C3     | 1.384 (4)   | C14—C15       | 1.382 (4)   |
| C2—H2A    | 0.9500      | C14—H14       | 0.9500      |
| C3—C4     | 1.380 (4)   | C15—C16       | 1.393 (4)   |
| C4—C5     | 1.385 (4)   | C15—H15       | 0.9500      |
| C4—H4     | 0.9500      | C16—C17       | 1.513 (4)   |
| C5—C6     | 1.398 (4)   | C17—H17A      | 0.9800      |
| C5—H5     | 0.9500      | C17—H17B      | 0.9800      |
| C6—C7     | 1.507 (3)   | C17—H17C      | 0.9800      |
| C7—C8     | 1.528 (3)   |               |             |
|           |             |               |             |
| O4—S1—O3  | 119.41 (11) | N2—C8—H8      | 109.1       |
| O4—S1—N2  | 106.72 (11) | C7—C8—H8      | 109.1       |
| O3—S1—N2  | 107.25 (11) | C9—C8—H8      | 109.1       |
| O4—S1—C13 | 106.51 (12) | F2—C9—C10     | 109.0 (2)   |
| O3—S1—C13 | 107.36 (11) | F2—C9—C8      | 106.71 (19) |
| N2—S1—C13 | 109.33 (11) | C10—C9—C8     | 114.7 (2)   |
| O1—N1—O2  | 124.0 (3)   | F2—C9—H9      | 108.8       |
| O1—N1—C3  | 118.1 (3)   | C10—C9—H9     | 108.8       |
| O2—N1—C3  | 117.8 (3)   | C8—C9—H9      | 108.8       |
| C8—N2—S1  | 126.63 (17) | C9—C10—H10A   | 109.5       |
| C8—N2—H2  | 118 (2)     | C9—C10—H10B   | 109.5       |
| S1—N2—H2  | 115 (2)     | H10A—C10—H10B | 109.5       |
| C2—C1—C6  | 120.3 (3)   | C9—C10—H10C   | 109.5       |
| C2—C1—H1  | 119.9       | H10A—C10—H10C | 109.5       |
| C6—C1—H1  | 119.9       | H10B—C10—H10C | 109.5       |
| C3—C2—C1  | 117.9 (3)   | C12—C11—C16   | 121.2 (3)   |
| C3—C2—H2A | 121.0       | C12—C11—H11   | 119.4       |
| C1—C2—H2A | 121.0       | C16—C11—H11   | 119.4       |
| C4—C3—C2  | 123.2 (2)   | C11—C12—C13   | 119.4 (3)   |
| C4—C3—N1  | 117.8 (2)   | C11—C12—H12   | 120.3       |
| C2—C3—N1  | 119.0 (3)   | C13—C12—H12   | 120.3       |
| C3—C4—C5  | 118.5 (2)   | C14—C13—C12   | 120.3 (2)   |
| C3—C4—H4  | 120.7       | C14—C13—S1    | 120.73 (19) |

|              |             |                     |            |
|--------------|-------------|---------------------|------------|
| C5—C4—H4     | 120.7       | C12—C13—S1          | 118.9 (2)  |
| C4—C5—C6     | 119.5 (2)   | C15—C14—C13         | 119.0 (3)  |
| C4—C5—H5     | 120.3       | C15—C14—H14         | 120.5      |
| C6—C5—H5     | 120.3       | C13—C14—H14         | 120.5      |
| C1—C6—C5     | 120.6 (2)   | C14—C15—C16         | 121.6 (3)  |
| C1—C6—C7     | 119.0 (2)   | C14—C15—H15         | 119.2      |
| C5—C6—C7     | 120.4 (2)   | C16—C15—H15         | 119.2      |
| F1—C7—C6     | 108.9 (2)   | C11—C16—C15         | 118.4 (3)  |
| F1—C7—C8     | 106.48 (18) | C11—C16—C17         | 121.0 (3)  |
| C6—C7—C8     | 113.34 (19) | C15—C16—C17         | 120.6 (3)  |
| F1—C7—H7     | 109.3       | C16—C17—H17A        | 109.5      |
| C6—C7—H7     | 109.3       | C16—C17—H17B        | 109.5      |
| C8—C7—H7     | 109.3       | H17A—C17—H17B       | 109.5      |
| N2—C8—C7     | 109.34 (19) | C16—C17—H17C        | 109.5      |
| N2—C8—C9     | 109.40 (19) | H17A—C17—H17C       | 109.5      |
| C7—C8—C9     | 110.80 (19) | H17B—C17—H17C       | 109.5      |
|              |             |                     |            |
| O4—S1—N2—C8  | -147.6 (2)  | C6—C7—C8—N2         | 58.2 (3)   |
| O3—S1—N2—C8  | -18.5 (2)   | F1—C7—C8—C9         | 59.1 (2)   |
| C13—S1—N2—C8 | 97.6 (2)    | C6—C7—C8—C9         | 178.8 (2)  |
| C6—C1—C2—C3  | -0.6 (4)    | N2—C8—C9—F2         | -62.9 (3)  |
| C1—C2—C3—C4  | 0.1 (4)     | C7—C8—C9—F2         | 176.5 (2)  |
| C1—C2—C3—N1  | 178.8 (3)   | N2—C8—C9—C10        | 176.4 (2)  |
| O1—N1—C3—C4  | 172.5 (3)   | C7—C8—C9—C10        | 55.7 (3)   |
| O2—N1—C3—C4  | -5.6 (4)    | C16—C11—C12—<br>C13 | -0.1 (5)   |
| O1—N1—C3—C2  | -6.3 (4)    | C11—C12—C13—<br>C14 | -1.9 (4)   |
| O2—N1—C3—C2  | 175.7 (3)   | C11—C12—C13—S1      | 176.3 (2)  |
| C2—C3—C4—C5  | 0.5 (4)     | O4—S1—C13—C14       | 156.4 (2)  |
| N1—C3—C4—C5  | -178.2 (2)  | O3—S1—C13—C14       | 27.4 (2)   |
| C3—C4—C5—C6  | -0.5 (4)    | N2—S1—C13—C14       | -88.6 (2)  |
| C2—C1—C6—C5  | 0.7 (4)     | O4—S1—C13—C12       | -21.7 (2)  |
| C2—C1—C6—C7  | -178.5 (2)  | O3—S1—C13—C12       | -150.7 (2) |
| C4—C5—C6—C1  | -0.1 (4)    | N2—S1—C13—C12       | 93.2 (2)   |

|             |              |                 |            |
|-------------|--------------|-----------------|------------|
| C4—C5—C6—C7 | 179.0 (2)    | C12—C13—C14—C15 | 2.2 (4)    |
| C1—C6—C7—F1 | -153.5 (2)   | S1—C13—C14—C15  | -175.9 (2) |
| C5—C6—C7—F1 | 27.4 (3)     | C13—C14—C15—C16 | -0.7 (4)   |
| C1—C6—C7—C8 | 88.2 (3)     | C12—C11—C16—C15 | 1.5 (4)    |
| C5—C6—C7—C8 | -90.9 (3)    | C12—C11—C16—C17 | -178.1 (3) |
| S1—N2—C8—C7 | -130.93 (19) | C14—C15—C16—C11 | -1.2 (4)   |
| S1—N2—C8—C9 | 107.6 (2)    | C14—C15—C16—C17 | 178.5 (3)  |
| F1—C7—C8—N2 | -61.6 (2)    |                 |            |

**Table S13. Hydrogen-bond parameters**

| $D-H\cdots A$      | $D-H$ (Å) | $H\cdots A$ (Å) | $D\cdots A$ (Å) | $D-H\cdots A$ (°) |
|--------------------|-----------|-----------------|-----------------|-------------------|
| $N2-H2\cdots O3^i$ | 0.79 (3)  | 2.05 (3)        | 2.827 (3)       | 167 (3)           |

Symmetry code(s): (i)  $-x+1, y+1/2, -z+1$ .

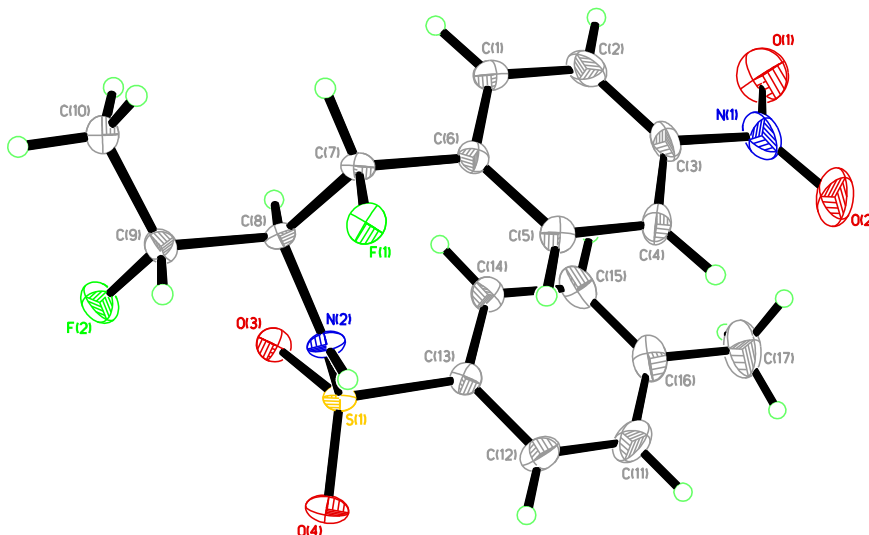

**Figure S8.** Perspective views showing 50% probability displacement

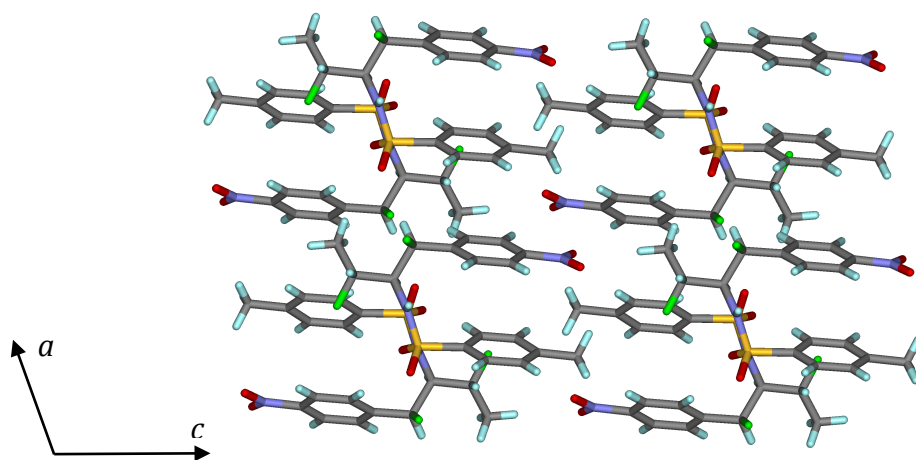

**Figure S9.** Three-dimensional supramolecular architecture viewed along the *b*-axis direction.



## X-Ray Crystallographic Information Data for 8

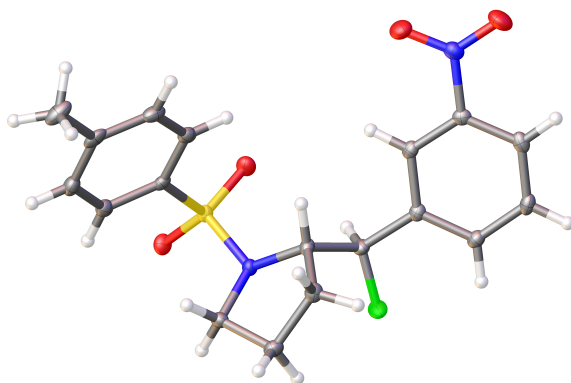

**X-ray Crystallography:** A crystal mounted on a diffractometer was collected data at 100 K. The intensities of the reflections were collected by means of a Bruker APEX II CCD diffractometer ( $\text{Mo}_{K\alpha}$  radiation,  $\lambda=0.71073 \text{ \AA}$ ), and equipped with an Oxford Cryosystems nitrogen flow apparatus. The collection method involved  $0.5^\circ$  scans in  $\omega$  at  $28^\circ$  in  $2\theta$ . Data integration down to  $0.78 \text{ \AA}$  resolution was carried out using SAINT V8.37A with reflection spot size optimization.<sup>11</sup> Absorption corrections were made with the program SADABS. The structure was solved by the Intrinsic Phasing methods and refined by least-squares methods against  $F^2$  using SHELXT-2014<sup>12</sup> and SHELXL-2014<sup>13</sup> with OLEX 2 interface.<sup>14</sup> Non-hydrogen atoms were refined anisotropically, and hydrogen atoms were allowed to ride on the respective atoms. Crystal data as well as details of data collection and refinement are summarized in Table S14, and geometric parameters are shown in Table S15. The Ortep plots produced with SHELXL-2014 program, and the other drawings were produced with Accelrys DS Visualizer 2.0.<sup>15</sup>

**Table S14. Experimental details**

|                             |                                                           |
|-----------------------------|-----------------------------------------------------------|
| Crystal data                |                                                           |
| Chemical formula            | $\text{C}_{18}\text{H}_{19}\text{FN}_2\text{O}_4\text{S}$ |
| $M_r$                       | 378.41                                                    |
| Crystal system, space group | Orthorhombic, $P2_12_12_1$                                |
| Temperature (K)             | 100                                                       |
| $a, b, c$ ( $\text{\AA}$ )  | 7.4092 (7), 10.2119 (9), 22.525 (2)                       |
| $V$ ( $\text{\AA}^3$ )      | 1704.3 (3)                                                |
| $Z$                         | 4                                                         |
| Radiation type              | Mo $K\alpha$                                              |
| $\mu$ ( $\text{mm}^{-1}$ )  | 0.23                                                      |
| Crystal size (mm)           | $0.24 \times 0.18 \times 0.12$                            |
| Data collection             |                                                           |
| Diffractometer              | Bruker D8 goniometer with CCD area detector               |

|                                                                       |                                                                                                                                    |
|-----------------------------------------------------------------------|------------------------------------------------------------------------------------------------------------------------------------|
| Absorption correction                                                 | Multi-scan<br><i>SADABS</i>                                                                                                        |
| $T_{\min}, T_{\max}$                                                  | 0.746, 0.801                                                                                                                       |
| No. of measured, independent and observed [ $I > 2s(I)$ ] reflections | 19152, 3766, 3651                                                                                                                  |
| $R_{\text{int}}$                                                      | 0.025                                                                                                                              |
| $(\sin \theta/\lambda)_{\text{max}}$ ( $\text{\AA}^{-1}$ )            | 0.641                                                                                                                              |
| Refinement                                                            |                                                                                                                                    |
| $R[F^2 > 2s(F^2)], wR(F^2), S$                                        | 0.031, 0.077, 1.10                                                                                                                 |
| No. of reflections                                                    | 3766                                                                                                                               |
| No. of parameters                                                     | 236                                                                                                                                |
| H-atom treatment                                                      | H-atom parameters constrained                                                                                                      |
| $D\rho_{\text{max}}, D\rho_{\text{min}}$ ( $\text{e \AA}^{-3}$ )      | 0.38, -0.28                                                                                                                        |
| Absolute structure                                                    | Flack x determined using 1497 quotients $[(I^+)-(I^-)]/[(I^+)+(I^-)]$ (Parsons, Flack and Wagner, Acta Cryst. B69 (2013) 249-259). |
| Absolute structure parameter                                          | -0.024 (19)                                                                                                                        |

Computer programs: *APEX3* v2016.9-0 (Bruker-AXS, 2016), *SAINT* 8.37A (Bruker-AXS, 2015), *SHELXT2014* (Sheldrick, 2015), *SHELXL2014* (Sheldrick, 2015), Bruker *SHELXTL* (Sheldrick, 2015).

**Table S15. Geometric parameters ( $\text{\AA}$ ,  $^\circ$ )**

|        |             |          |           |
|--------|-------------|----------|-----------|
| S1—O4  | 1.4306 (17) | C8—H8    | 1.0000    |
| S1—O3  | 1.4370 (17) | C9—C10   | 1.530 (3) |
| S1—N2  | 1.632 (2)   | C9—H9A   | 0.9900    |
| S1—C12 | 1.765 (2)   | C9—H9B   | 0.9900    |
| F1—C7  | 1.406 (3)   | C10—C11  | 1.521 (3) |
| O1—N1  | 1.225 (3)   | C10—H10A | 0.9900    |
| O2—N1  | 1.225 (3)   | C10—H10B | 0.9900    |
| N1—C2  | 1.474 (3)   | C11—H11A | 0.9900    |
| N2—C8  | 1.482 (3)   | C11—H11B | 0.9900    |
| N2—C11 | 1.482 (3)   | C12—C13  | 1.387 (3) |
| C1—C2  | 1.376 (3)   | C12—C17  | 1.395 (3) |
| C1—C6  | 1.397 (3)   | C13—C14  | 1.382 (3) |
| C1—H1  | 0.9500      | C13—H13  | 0.9500    |
| C2—C3  | 1.387 (3)   | C14—C15  | 1.391 (3) |

|           |             |               |             |
|-----------|-------------|---------------|-------------|
| C3—C4     | 1.388 (3)   | C14—H14       | 0.9500      |
| C3—H3     | 0.9500      | C15—C16       | 1.396 (4)   |
| C4—C5     | 1.394 (3)   | C15—C18       | 1.503 (3)   |
| C4—H4     | 0.9500      | C16—C17       | 1.384 (4)   |
| C5—C6     | 1.391 (3)   | C16—H16       | 0.9500      |
| C5—H5     | 0.9500      | C17—H17       | 0.9500      |
| C6—C7     | 1.505 (3)   | C18—H18A      | 0.9800      |
| C7—C8     | 1.528 (3)   | C18—H18B      | 0.9800      |
| C7—H7     | 1.0000      | C18—H18C      | 0.9800      |
| C8—C9     | 1.535 (3)   |               |             |
|           |             |               |             |
| O4—S1—O3  | 120.35 (10) | C10—C9—C8     | 104.71 (18) |
| O4—S1—N2  | 106.78 (10) | C10—C9—H9A    | 110.8       |
| O3—S1—N2  | 106.19 (10) | C8—C9—H9A     | 110.8       |
| O4—S1—C12 | 107.70 (10) | C10—C9—H9B    | 110.8       |
| O3—S1—C12 | 108.86 (11) | C8—C9—H9B     | 110.8       |
| N2—S1—C12 | 106.11 (11) | H9A—C9—H9B    | 108.9       |
| O2—N1—O1  | 124.0 (2)   | C11—C10—C9    | 103.97 (18) |
| O2—N1—C2  | 117.97 (19) | C11—C10—H10A  | 111.0       |
| O1—N1—C2  | 118.0 (2)   | C9—C10—H10A   | 111.0       |
| C8—N2—C11 | 111.28 (18) | C11—C10—H10B  | 111.0       |
| C8—N2—S1  | 117.76 (15) | C9—C10—H10B   | 111.0       |
| C11—N2—S1 | 118.14 (14) | H10A—C10—H10B | 109.0       |
| C2—C1—C6  | 118.7 (2)   | N2—C11—C10    | 102.67 (17) |
| C2—C1—H1  | 120.6       | N2—C11—H11A   | 111.2       |
| C6—C1—H1  | 120.6       | C10—C11—H11A  | 111.2       |
| C1—C2—C3  | 123.4 (2)   | N2—C11—H11B   | 111.2       |
| C1—C2—N1  | 118.0 (2)   | C10—C11—H11B  | 111.2       |
| C3—C2—N1  | 118.6 (2)   | H11A—C11—H11B | 109.1       |
| C2—C3—C4  | 117.4 (2)   | C13—C12—C17   | 120.7 (2)   |
| C2—C3—H3  | 121.3       | C13—C12—S1    | 119.24 (17) |
| C4—C3—H3  | 121.3       | C17—C12—S1    | 119.94 (17) |
| C3—C4—C5  | 120.6 (2)   | C14—C13—C12   | 119.4 (2)   |
| C3—C4—H4  | 119.7       | C14—C13—H13   | 120.3       |
| C5—C4—H4  | 119.7       | C12—C13—H13   | 120.3       |

|               |             |               |              |
|---------------|-------------|---------------|--------------|
| C6—C5—C4      | 120.7 (2)   | C13—C14—C15   | 121.1 (2)    |
| C6—C5—H5      | 119.6       | C13—C14—H14   | 119.4        |
| C4—C5—H5      | 119.6       | C15—C14—H14   | 119.4        |
| C5—C6—C1      | 119.1 (2)   | C14—C15—C16   | 118.6 (2)    |
| C5—C6—C7      | 122.4 (2)   | C14—C15—C18   | 120.7 (2)    |
| C1—C6—C7      | 118.4 (2)   | C16—C15—C18   | 120.7 (2)    |
| F1—C7—C6      | 109.59 (18) | C17—C16—C15   | 121.2 (2)    |
| F1—C7—C8      | 108.64 (18) | C17—C16—H16   | 119.4        |
| C6—C7—C8      | 113.42 (19) | C15—C16—H16   | 119.4        |
| F1—C7—H7      | 108.4       | C16—C17—C12   | 118.9 (2)    |
| C6—C7—H7      | 108.4       | C16—C17—H17   | 120.5        |
| C8—C7—H7      | 108.4       | C12—C17—H17   | 120.5        |
| N2—C8—C7      | 109.29 (18) | C15—C18—H18A  | 109.5        |
| N2—C8—C9      | 104.38 (17) | C15—C18—H18B  | 109.5        |
| C7—C8—C9      | 115.24 (19) | H18A—C18—H18B | 109.5        |
| N2—C8—H8      | 109.2       | C15—C18—H18C  | 109.5        |
| C7—C8—H8      | 109.2       | H18A—C18—H18C | 109.5        |
| C9—C8—H8      | 109.2       | H18B—C18—H18C | 109.5        |
|               |             |               |              |
| O4—S1—N2—C8   | 165.87 (16) | S1—N2—C8—C9   | 143.46 (16)  |
| O3—S1—N2—C8   | 36.29 (18)  | F1—C7—C8—N2   | -72.7 (2)    |
| C12—S1—N2—C8  | -79.45 (17) | C6—C7—C8—N2   | 165.16 (19)  |
| O4—S1—N2—C11  | -55.83 (18) | F1—C7—C8—C9   | 44.4 (3)     |
| O3—S1—N2—C11  | 174.59 (17) | C6—C7—C8—C9   | -77.7 (2)    |
| C12—S1—N2—C11 | 58.86 (18)  | N2—C8—C9—C10  | 19.6 (2)     |
| C6—C1—C2—C3   | 1.1 (4)     | C7—C8—C9—C10  | -100.2 (2)   |
| C6—C1—C2—N1   | 179.1 (2)   | C8—C9—C10—C11 | -34.1 (2)    |
| O2—N1—C2—C1   | 5.7 (3)     | C8—N2—C11—C10 | -23.5 (2)    |
| O1—N1—C2—C1   | -174.1 (2)  | S1—N2—C11—C10 | -164.34 (15) |
| O2—N1—C2—C3   | -176.1 (2)  | C9—C10—C11—N2 | 34.9 (2)     |
| O1—N1—C2—C3   | 4.1 (3)     | O4—S1—C12—C13 | 22.4 (2)     |
| C1—C2—C3—C4   | -0.2 (3)    | O3—S1—C12—C13 | 154.44 (19)  |
| N1—C2—C3—C4   | -178.2 (2)  | N2—S1—C12—C13 | -91.6 (2)    |
| C2—C3—C4—C5   | -0.9 (3)    | O4—S1—C12—C17 | -160.69 (19) |
| C3—C4—C5—C6   | 1.1 (4)     | O3—S1—C12—C17 | -28.7 (2)    |

|              |              |                 |              |
|--------------|--------------|-----------------|--------------|
| C4—C5—C6—C1  | -0.2 (3)     | N2—S1—C12—C17   | 85.3 (2)     |
| C4—C5—C6—C7  | 177.0 (2)    | C17—C12—C13—C14 | 0.4 (4)      |
| C2—C1—C6—C5  | -0.9 (3)     | S1—C12—C13—C14  | 177.31 (19)  |
| C2—C1—C6—C7  | -178.1 (2)   | C12—C13—C14—C15 | -0.2 (4)     |
| C5—C6—C7—F1  | 4.3 (3)      | C13—C14—C15—C16 | -0.6 (4)     |
| C1—C6—C7—F1  | -178.59 (19) | C13—C14—C15—C18 | 178.1 (2)    |
| C5—C6—C7—C8  | 125.9 (2)    | C14—C15—C16—C17 | 1.3 (4)      |
| C1—C6—C7—C8  | -57.0 (3)    | C18—C15—C16—C17 | -177.4 (2)   |
| C11—N2—C8—C7 | 126.3 (2)    | C15—C16—C17—C12 | -1.1 (4)     |
| S1—N2—C8—C7  | -92.7 (2)    | C13—C12—C17—C16 | 0.2 (4)      |
| C11—N2—C8—C9 | 2.5 (2)      | S1—C12—C17—C16  | -176.62 (18) |

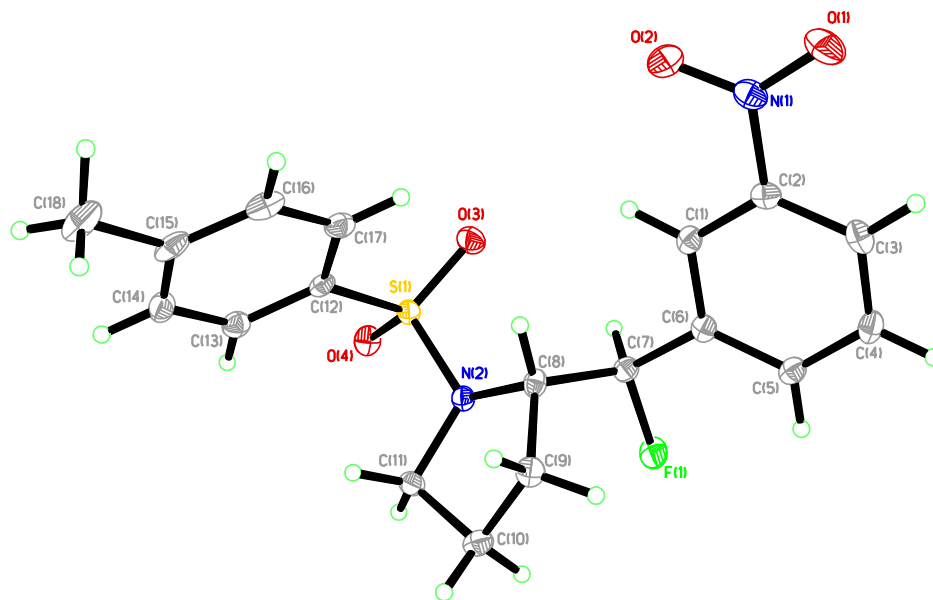

**Figure S10.** Perspective views showing 50% probability displacement

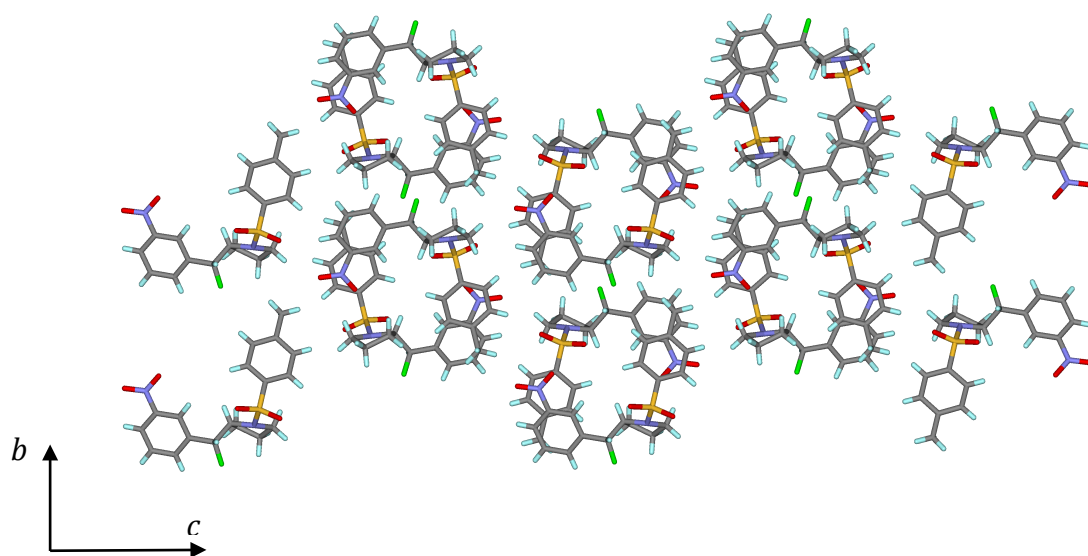

**Figure S11.** Three-dimensional supramolecular architecture viewed along the  $a$ -axis direction.

## X-Ray Crystallographic Information Data for 12

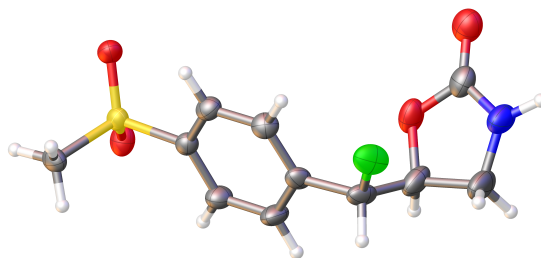

**X-ray Crystallography:** A crystal mounted on a diffractometer was collected data at 100 K. The intensities of the reflections were collected by means of a Bruker APEX DUO CCD diffractometer (Cu<sub>Kα</sub> radiation,  $\lambda=1.54178$  Å), and equipped with an Oxford Cryosystems nitrogen flow apparatus. The collection method involved  $1.0^\circ$  scans in  $\omega$  at  $-30^\circ$ ,  $-55^\circ$ ,  $-80^\circ$ ,  $30^\circ$ ,  $55^\circ$ ,  $80^\circ$  and  $115^\circ$  in  $2\theta$ . Data integration down to  $0.84$  Å resolution was carried out using SAINT V8.37 A with reflection spot size optimization.<sup>11</sup> Absorption corrections were made with the program SADABS (Bruker diffractometer, 2015). The structure was solved by the Intrinsic Phasing methods and refined by least-squares methods against  $F^2$  using SHELXT-2014<sup>12</sup> and SHELXL-2014<sup>13</sup> with OLEX 2 interface.<sup>14</sup> Non-hydrogen atoms were refined anisotropically, and hydrogen atoms were allowed to ride on the respective atoms. Crystal data as well as details of data collection and refinement are summarized in Table S16, geometric parameters are shown in Table S17 and hydrogen-bond parameters are listed in Table S18. The Ortep plots produced with SHELXL-2014 program, and the other drawings were produced with Accelrys DS Visualizer 2.0.<sup>15</sup>

**Table S16. Experimental details**

|                             |                                                          |
|-----------------------------|----------------------------------------------------------|
| Crystal data                |                                                          |
| Chemical formula            | C <sub>11</sub> H <sub>12.50</sub> FNO <sub>4.25</sub> S |
| $M_r$                       | 277.78                                                   |
| Crystal system, space group | Hexagonal, $P6_2$                                        |
| Temperature (K)             | 100                                                      |
| $a, c$ (Å)                  | 17.8047 (4), 6.9972 (2)                                  |
| $V$ (Å <sup>3</sup> )       | 1920.99 (10)                                             |
| $Z$                         | 6                                                        |
| Radiation type              | Cu $K\alpha$                                             |
| $\mu$ (mm <sup>-1</sup> )   | 2.48                                                     |
| Crystal size (mm)           | 0.24 × 0.18 × 0.12                                       |
| Data collection             |                                                          |
| Diffractometer              | Bruker D8 goniometer with CCD area detector              |
| Absorption correction       | Multi-scan<br>SADABS                                     |
| $T_{\min}, T_{\max}$        | 0.660, 0.806                                             |

|                                                                       |                                                                                                                                     |
|-----------------------------------------------------------------------|-------------------------------------------------------------------------------------------------------------------------------------|
| No. of measured, independent and observed [ $I > 2s(I)$ ] reflections | 14238, 2181, 2133                                                                                                                   |
| $R_{\text{int}}$                                                      | 0.046                                                                                                                               |
| $(\sin q/l)_{\text{max}}$ ( $\text{\AA}^{-1}$ )                       | 0.595                                                                                                                               |
| Refinement                                                            |                                                                                                                                     |
| $R[F^2 > 2s(F^2)], wR(F^2), S$                                        | 0.033, 0.090, 1.07                                                                                                                  |
| No. of reflections                                                    | 2181                                                                                                                                |
| No. of parameters                                                     | 177                                                                                                                                 |
| No. of restraints                                                     | 7                                                                                                                                   |
| H-atom treatment                                                      | H atoms treated by a mixture of independent and constrained refinement                                                              |
| $D\rho_{\text{max}}, D\rho_{\text{min}}$ ( $e \text{\AA}^{-3}$ )      | 0.30, -0.20                                                                                                                         |
| Absolute structure                                                    | Flack $x$ determined using 924 quotients $[(I^+)-(I^-)]/[(I^+)+(I^-)]$ (Parsons, Flack and Wagner, Acta Cryst. B69 (2013) 249-259). |
| Absolute structure parameter                                          | -0.021 (19)                                                                                                                         |

Computer programs: *APEX3* v2016.9-0 (Bruker-AXS, 2016), *SAINT* 8.37A (Bruker-AXS, 2015), *SHELXT2014* (Sheldrick, 2015), *SHELXL2014* (Sheldrick, 2015), Bruker *SHELXTL* (Sheldrick, 2015).

**Table S17. Geometric parameters ( $\text{\AA}$ ,  $^\circ$ )**

|        |           |          |           |
|--------|-----------|----------|-----------|
| S1—O4  | 1.441 (2) | C5—C6    | 1.378 (5) |
| S1—O3  | 1.445 (2) | C5—C10   | 1.398 (5) |
| S1—C11 | 1.760 (3) | C6—C7    | 1.386 (5) |
| S1—C8  | 1.771 (3) | C6—H6    | 0.9500    |
| F1—C4  | 1.405 (4) | C7—C8    | 1.378 (5) |
| O1—C1  | 1.363 (5) | C7—H7    | 0.9500    |
| O1—C3  | 1.447 (5) | C8—C9    | 1.386 (5) |
| O2—C1  | 1.214 (5) | C9—C10   | 1.383 (5) |
| N1—C1  | 1.335 (5) | C9—H9    | 0.9500    |
| N1—C2  | 1.452 (6) | C10—H10  | 0.9500    |
| N1—H1  | 0.95 (7)  | C11—H11A | 0.9800    |
| C2—C3  | 1.534 (5) | C11—H11B | 0.9800    |
| C2—H2A | 0.9900    | C11—H11C | 0.9800    |
| C2—H2B | 0.9900    | O1W—O2W  | 1.0 (2)   |
| C3—C4  | 1.502 (6) | O1W—H1WA | 0.8124    |



|            |             |                   |           |
|------------|-------------|-------------------|-----------|
| C3—H3      | 1.0000      | O1W—H1WB          | 0.8201    |
| C4—C5      | 1.505 (4)   | O2W—H2WA          | 0.7833    |
| C4—H4      | 1.0000      | O2W—H2WB          | 0.8183    |
|            |             |                   |           |
| O4—S1—O3   | 118.24 (14) | C6—C5—C10         | 120.3 (3) |
| O4—S1—C11  | 108.27 (15) | C6—C5—C4          | 120.8 (3) |
| O3—S1—C11  | 108.42 (14) | C10—C5—C4         | 118.9 (3) |
| O4—S1—C8   | 107.82 (14) | C5—C6—C7          | 120.2 (3) |
| O3—S1—C8   | 107.47 (15) | C5—C6—H6          | 119.9     |
| C11—S1—C8  | 105.97 (15) | C7—C6—H6          | 119.9     |
| C1—O1—C3   | 110.6 (3)   | C8—C7—C6          | 119.1 (3) |
| C1—N1—C2   | 112.7 (3)   | C8—C7—H7          | 120.5     |
| C1—N1—H1   | 115 (3)     | C6—C7—H7          | 120.5     |
| C2—N1—H1   | 131 (3)     | C7—C8—C9          | 121.7 (3) |
| O2—C1—N1   | 129.8 (4)   | C7—C8—S1          | 119.1 (2) |
| O2—C1—O1   | 120.7 (3)   | C9—C8—S1          | 119.2 (3) |
| N1—C1—O1   | 109.5 (3)   | C10—C9—C8         | 119.0 (3) |
| N1—C2—C3   | 101.9 (3)   | C10—C9—H9         | 120.5     |
| N1—C2—H2A  | 111.4       | C8—C9—H9          | 120.5     |
| C3—C2—H2A  | 111.4       | C9—C10—C5         | 119.7 (3) |
| N1—C2—H2B  | 111.4       | C9—C10—H10        | 120.1     |
| C3—C2—H2B  | 111.4       | C5—C10—H10        | 120.1     |
| H2A—C2—H2B | 109.2       | S1—C11—H11A       | 109.5     |
| O1—C3—C4   | 108.8 (3)   | S1—C11—H11B       | 109.5     |
| O1—C3—C2   | 104.4 (3)   | H11A—C11—H11B     | 109.5     |
| C4—C3—C2   | 114.5 (4)   | S1—C11—H11C       | 109.5     |
| O1—C3—H3   | 109.7       | H11A—C11—H11C     | 109.5     |
| C4—C3—H3   | 109.7       | H11B—C11—H11C     | 109.5     |
| C2—C3—H3   | 109.7       | O2W—O1W—H1WA      | 150.7     |
| F1—C4—C3   | 108.0 (3)   | O2W—O1W—H1WB      | 96.4      |
| F1—C4—C5   | 109.2 (3)   | H1WA—O1W—<br>H1WB | 112.3     |
| C3—C4—C5   | 113.3 (3)   | O1W—O2W—H2WA      | 173.4     |
| F1—C4—H4   | 108.7       | O1W—O2W—H2WB      | 77.8      |
| C3—C4—H4   | 108.7       | H2WA—O2W—         | 105.9     |

|              |            | H2WB         |            |
|--------------|------------|--------------|------------|
| C5—C4—H4     | 108.7      |              |            |
| C2—N1—C1—O2  | -174.4 (4) | C10—C5—C6—C7 | -0.9 (5)   |
| C2—N1—C1—O1  | 6.4 (5)    | C4—C5—C6—C7  | 175.8 (3)  |
| C3—O1—C1—O2  | -179.7 (4) | C5—C6—C7—C8  | -1.4 (5)   |
| C3—O1—C1—N1  | -0.4 (4)   | C6—C7—C8—C9  | 2.3 (5)    |
| C1—N1—C2—C3  | -9.2 (5)   | C6—C7—C8—S1  | -175.8 (2) |
| C1—O1—C3—C4  | 117.4 (3)  | O4—S1—C8—C7  | 151.1 (2)  |
| C1—O1—C3—C2  | -5.2 (4)   | O3—S1—C8—C7  | 22.6 (3)   |
| N1—C2—C3—O1  | 8.2 (5)    | C11—S1—C8—C7 | -93.2 (3)  |
| N1—C2—C3—C4  | -110.6 (4) | O4—S1—C8—C9  | -27.1 (3)  |
| O1—C3—C4—F1  | -68.6 (3)  | O3—S1—C8—C9  | -155.6 (3) |
| C2—C3—C4—F1  | 47.7 (4)   | C11—S1—C8—C9 | 88.7 (3)   |
| O1—C3—C4—C5  | 52.6 (4)   | C7—C8—C9—C10 | -0.7 (5)   |
| C2—C3—C4—C5  | 168.9 (3)  | S1—C8—C9—C10 | 177.4 (3)  |
| F1—C4—C5—C6  | 13.7 (4)   | C8—C9—C10—C5 | -1.6 (5)   |
| C3—C4—C5—C6  | -106.8 (4) | C6—C5—C10—C9 | 2.5 (5)    |
| F1—C4—C5—C10 | -169.6 (3) | C4—C5—C10—C9 | -174.3 (3) |
| C3—C4—C5—C10 | 70.0 (4)   |              |            |

**Table S18. Hydrogen-bond parameters**

| <i>D</i> —H... <i>A</i>  | <i>D</i> —H (Å) | H... <i>A</i> (Å) | <i>D</i> ... <i>A</i> (Å) | <i>D</i> —H... <i>A</i> (°) |
|--------------------------|-----------------|-------------------|---------------------------|-----------------------------|
| N1—H1...O1 <sup>i</sup>  | 0.95 (7)        | 2.68 (5)          | 3.077 (4)                 | 106 (4)                     |
| N1—H1...O2 <sup>i</sup>  | 0.95 (7)        | 2.08 (7)          | 2.978 (5)                 | 158 (5)                     |
| C2—H2B...O1 <sup>i</sup> | 0.99            | 2.54              | 3.096 (5)                 | 115.4                       |

Symmetry code(s): (i)  $x-y+1, x, z+1/3$ .

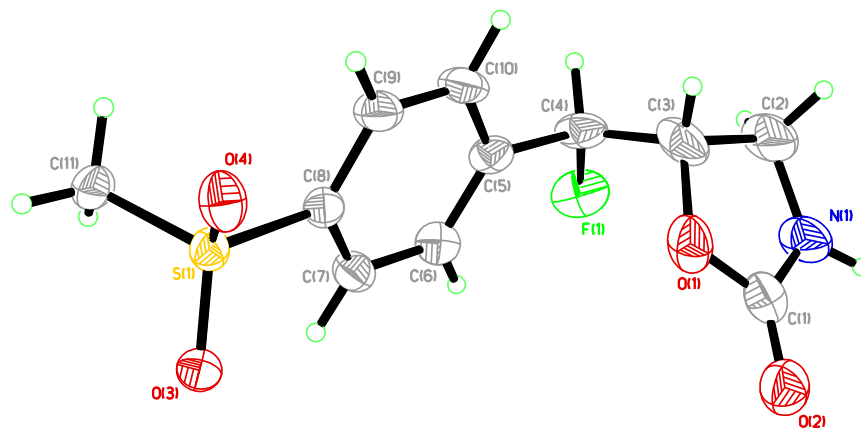

**Figure S12.** Perspective views showing 50% probability displacement

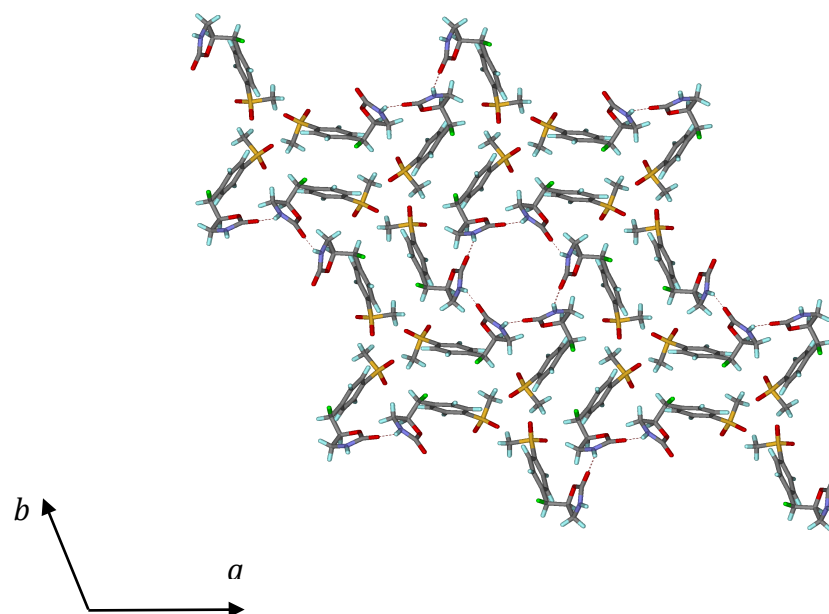

**Figure S13.** Three-dimensional supramolecular architecture viewed along the  $c$ -axis direction.

## X-Ray Crystallographic Information Data for 16

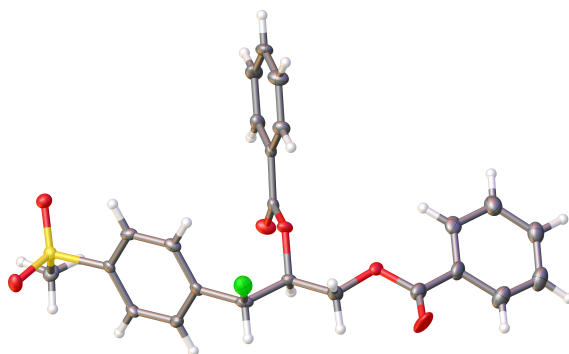

**X-ray Crystallography:** A crystal mounted on a diffractometer was collected data at 100 K. The intensities of the reflections were collected by means of a Bruker APEX II CCD diffractometer (Mo<sub>K</sub> $\alpha$  radiation,  $\lambda=0.71073$  Å), and equipped with an Oxford Cryosystems nitrogen flow apparatus. The collection method involved  $0.5^\circ$  scans in  $\omega$  at  $28^\circ$  in  $2\theta$ . Data integration down to  $0.78$  Å resolution was carried out using SAINT V8.37A with reflection spot size optimization.<sup>11</sup> Absorption corrections were made with the program SADABS. The structure was solved by the Intrinsic Phasing methods and refined by least-squares methods against  $F^2$  using SHELXT-2014<sup>12</sup> and SHELXL-2014<sup>13</sup> with OLEX 2 interface.<sup>14</sup> Non-hydrogen atoms were refined anisotropically, and hydrogen atoms were allowed to ride on the respective atoms. Crystal data as well as details of data collection and refinement are summarized in Table S19, and geometric parameters are shown in Table S20. The Ortep plots produced with SHELXL-2014 program, and the other drawings were produced with Accelrys DS Visualizer 2.0.<sup>15</sup>

**Table S19. Experimental details**

|                             |                                                   |
|-----------------------------|---------------------------------------------------|
| Crystal data                |                                                   |
| Chemical formula            | C <sub>24</sub> H <sub>21</sub> FO <sub>6</sub> S |
| $M_r$                       | 456.47                                            |
| Crystal system, space group | Orthorhombic, $P2_12_12_1$                        |
| Temperature (K)             | 100                                               |
| $a, b, c$ (Å)               | 5.2733 (3), 10.7709 (6), 37.817 (2)               |
| $V$ (Å <sup>3</sup> )       | 2147.9 (2)                                        |
| $Z$                         | 4                                                 |
| Radiation type              | Mo $K\alpha$                                      |
| $\mu$ (mm <sup>-1</sup> )   | 0.20                                              |
| Crystal size (mm)           | 0.18 × 0.04 × 0.02                                |
|                             |                                                   |
| Data collection             |                                                   |

|                                                                       |                                                                                                                                    |
|-----------------------------------------------------------------------|------------------------------------------------------------------------------------------------------------------------------------|
| Diffractometer                                                        | Bruker D8 goniometer with CCD area detector                                                                                        |
| Absorption correction                                                 | Multi-scan<br><i>SADABS</i>                                                                                                        |
| $T_{\min}, T_{\max}$                                                  | 0.719, 0.862                                                                                                                       |
| No. of measured, independent and observed [ $I > 2s(I)$ ] reflections | 15038, 4709, 3791                                                                                                                  |
| $R_{\text{int}}$                                                      | 0.051                                                                                                                              |
| $(\sin \theta/\lambda)_{\text{max}}$ ( $\text{\AA}^{-1}$ )            | 0.642                                                                                                                              |
| Refinement                                                            |                                                                                                                                    |
| $R[F^2 > 2s(F^2)], wR(F^2), S$                                        | 0.052, 0.093, 1.08                                                                                                                 |
| No. of reflections                                                    | 4709                                                                                                                               |
| No. of parameters                                                     | 318                                                                                                                                |
| No. of restraints                                                     | 72                                                                                                                                 |
| H-atom treatment                                                      | H-atom parameters constrained                                                                                                      |
| $D\rho_{\text{max}}, D\rho_{\text{min}}$ ( $e \text{\AA}^{-3}$ )      | 0.30, -0.35                                                                                                                        |
| Absolute structure                                                    | Flack x determined using 1250 quotients $[(I^+)-(I^-)]/[(I^+)+(I^-)]$ (Parsons, Flack and Wagner, Acta Cryst. B69 (2013) 249-259). |
| Absolute structure parameter                                          | -0.01 (5)                                                                                                                          |

Computer programs: *APEX3* v2016.9-0 (Bruker-AXS, 2016), *SAINT* 8.37A (Bruker-AXS, 2015), *SHELXT2014* (Sheldrick, 2015), *SHELXL2014* (Sheldrick, 2015), Bruker *SHELXTL* (Sheldrick, 2015).

**Table S20. Selected geometric parameters ( $\text{\AA}$ ,  $^\circ$ )**

|        |           |         |            |
|--------|-----------|---------|------------|
| S1—O2  | 1.440 (2) | C13—H13 | 0.9500     |
| S1—O1  | 1.449 (2) | C14—C15 | 1.375 (6)  |
| S1—C10 | 1.753 (4) | C14—H14 | 0.9500     |
| S1—C3  | 1.778 (3) | C15—C16 | 1.384 (5)  |
| F1—C7  | 1.407 (4) | C15—H15 | 0.9500     |
| O3—C11 | 1.358 (4) | C16—C17 | 1.380 (5)  |
| O3—C8  | 1.439 (4) | C16—H16 | 0.9500     |
| O4—C11 | 1.207 (4) | C17—H17 | 0.9500     |
| C1—C2  | 1.387 (4) | O5—C18  | 1.313 (16) |
| C1—C6  | 1.389 (5) | C18—O6  | 1.195 (16) |
| C1—H1  | 0.9500    | C18—C19 | 1.483 (17) |
| C2—C3  | 1.389 (5) | C19—C20 | 1.380 (18) |

|           |             |             |            |
|-----------|-------------|-------------|------------|
| C2—H2     | 0.9500      | C19—C24     | 1.396 (16) |
| C3—C4     | 1.382 (4)   | C20—C21     | 1.394 (16) |
| C4—C5     | 1.384 (4)   | C20—H20     | 0.9500     |
| C4—H4     | 0.9500      | C21—C22     | 1.386 (16) |
| C5—C6     | 1.391 (5)   | C21—H21     | 0.9500     |
| C5—H5     | 0.9500      | C22—C23     | 1.369 (15) |
| C6—C7     | 1.514 (4)   | C22—H22     | 0.9500     |
| C7—C8     | 1.519 (5)   | C23—C24     | 1.387 (16) |
| C7—H7     | 1.0000      | C23—H23     | 0.9500     |
| C8—C9     | 1.510 (4)   | C24—H24     | 0.9500     |
| C8—H8     | 1.0000      | O5A—C18A    | 1.324 (11) |
| C9—O5     | 1.42 (4)    | C18A—O6A    | 1.207 (12) |
| C9—O5A    | 1.47 (2)    | C18A—C19A   | 1.486 (13) |
| C9—H9AA   | 0.9900      | C19A—C20A   | 1.381 (16) |
| C9—H9AB   | 0.9900      | C19A—C24A   | 1.394 (12) |
| C9—H9BC   | 0.9900      | C20A—C21A   | 1.390 (12) |
| C9—H9BD   | 0.9900      | C20A—H20A   | 0.9500     |
| C10—H10A  | 0.9800      | C21A—C22A   | 1.378 (12) |
| C10—H10B  | 0.9800      | C21A—H21A   | 0.9500     |
| C10—H10C  | 0.9800      | C22A—C23A   | 1.374 (12) |
| C11—C12   | 1.481 (5)   | C22A—H22A   | 0.9500     |
| C12—C17   | 1.381 (5)   | C23A—C24A   | 1.394 (12) |
| C12—C13   | 1.399 (5)   | C23A—H23A   | 0.9500     |
| C13—C14   | 1.375 (5)   | C24A—H24A   | 0.9500     |
|           |             |             |            |
| O2—S1—O1  | 117.74 (15) | C13—C12—C11 | 118.4 (3)  |
| O2—S1—C10 | 108.75 (16) | C14—C13—C12 | 120.2 (4)  |
| O1—S1—C10 | 108.67 (16) | C14—C13—H13 | 119.9      |
| O2—S1—C3  | 107.73 (14) | C12—C13—H13 | 119.9      |
| O1—S1—C3  | 106.87 (14) | C13—C14—C15 | 120.2 (3)  |
| C10—S1—C3 | 106.54 (17) | C13—C14—H14 | 119.9      |
| C11—O3—C8 | 117.4 (3)   | C15—C14—H14 | 119.9      |
| C2—C1—C6  | 120.6 (3)   | C14—C15—C16 | 120.2 (4)  |
| C2—C1—H1  | 119.7       | C14—C15—H15 | 119.9      |
| C6—C1—H1  | 119.7       | C16—C15—H15 | 119.9      |

|              |            |                |            |
|--------------|------------|----------------|------------|
| C1—C2—C3     | 118.9 (3)  | C17—C16—C15    | 119.9 (4)  |
| C1—C2—H2     | 120.5      | C17—C16—H16    | 120.1      |
| C3—C2—H2     | 120.5      | C15—C16—H16    | 120.1      |
| C4—C3—C2     | 121.0 (3)  | C16—C17—C12    | 120.5 (3)  |
| C4—C3—S1     | 117.8 (3)  | C16—C17—H17    | 119.8      |
| C2—C3—S1     | 121.1 (2)  | C12—C17—H17    | 119.8      |
| C3—C4—C5     | 119.7 (3)  | C18—O5—C9      | 116 (3)    |
| C3—C4—H4     | 120.1      | O6—C18—O5      | 118 (2)    |
| C5—C4—H4     | 120.1      | O6—C18—C19     | 126 (2)    |
| C4—C5—C6     | 120.1 (3)  | O5—C18—C19     | 114.6 (19) |
| C4—C5—H5     | 120.0      | C20—C19—C24    | 120.1 (16) |
| C6—C5—H5     | 120.0      | C20—C19—C18    | 122.1 (18) |
| C1—C6—C5     | 119.7 (3)  | C24—C19—C18    | 117.8 (18) |
| C1—C6—C7     | 119.1 (3)  | C19—C20—C21    | 119.4 (19) |
| C5—C6—C7     | 121.3 (3)  | C19—C20—H20    | 120.3      |
| F1—C7—C6     | 108.8 (3)  | C21—C20—H20    | 120.3      |
| F1—C7—C8     | 108.4 (3)  | C22—C21—C20    | 119.4 (17) |
| C6—C7—C8     | 113.4 (3)  | C22—C21—H21    | 120.3      |
| F1—C7—H7     | 108.7      | C20—C21—H21    | 120.3      |
| C6—C7—H7     | 108.7      | C23—C22—C21    | 121.8 (17) |
| C8—C7—H7     | 108.7      | C23—C22—H22    | 119.1      |
| O3—C8—C9     | 107.6 (3)  | C21—C22—H22    | 119.1      |
| O3—C8—C7     | 109.4 (3)  | C22—C23—C24    | 118.5 (18) |
| C9—C8—C7     | 110.9 (3)  | C22—C23—H23    | 120.7      |
| O3—C8—H8     | 109.6      | C24—C23—H23    | 120.7      |
| C9—C8—H8     | 109.6      | C23—C24—C19    | 120.5 (16) |
| C7—C8—H8     | 109.6      | C23—C24—H24    | 119.7      |
| O5—C9—C8     | 110.4 (13) | C19—C24—H24    | 119.7      |
| O5A—C9—C8    | 103.8 (8)  | C18A—O5A—C9    | 118.2 (19) |
| O5—C9—H9AA   | 109.6      | O6A—C18A—O5A   | 123.3 (17) |
| C8—C9—H9AA   | 109.6      | O6A—C18A—C19A  | 123.3 (15) |
| O5—C9—H9AB   | 109.6      | O5A—C18A—C19A  | 113.3 (13) |
| C8—C9—H9AB   | 109.6      | C20A—C19A—C24A | 119.4 (12) |
| H9AA—C9—H9AB | 108.1      | C20A—C19A—C18A | 122.2 (13) |
| O5A—C9—H9BC  | 111.0      | C24A—C19A—C18A | 118.4 (15) |

|               |            |                 |             |
|---------------|------------|-----------------|-------------|
| C8—C9—H9BC    | 111.0      | C19A—C20A—C21A  | 120.1 (13)  |
| O5A—C9—H9BD   | 111.0      | C19A—C20A—H20A  | 120.0       |
| C8—C9—H9BD    | 111.0      | C21A—C20A—H20A  | 120.0       |
| H9BC—C9—H9BD  | 109.0      | C22A—C21A—C20A  | 120.2 (12)  |
| S1—C10—H10A   | 109.5      | C22A—C21A—H21A  | 119.9       |
| S1—C10—H10B   | 109.5      | C20A—C21A—H21A  | 119.9       |
| H10A—C10—H10B | 109.5      | C23A—C22A—C21A  | 120.2 (12)  |
| S1—C10—H10C   | 109.5      | C23A—C22A—H22A  | 119.9       |
| H10A—C10—H10C | 109.5      | C21A—C22A—H22A  | 119.9       |
| H10B—C10—H10C | 109.5      | C22A—C23A—C24A  | 119.8 (12)  |
| O4—C11—O3     | 123.7 (3)  | C22A—C23A—H23A  | 120.1       |
| O4—C11—C12    | 125.4 (3)  | C24A—C23A—H23A  | 120.1       |
| O3—C11—C12    | 110.9 (3)  | C19A—C24A—C23A  | 120.1 (13)  |
| C17—C12—C13   | 119.1 (3)  | C19A—C24A—H24A  | 120.0       |
| C17—C12—C11   | 122.5 (3)  | C23A—C24A—H24A  | 120.0       |
|               |            |                 |             |
| C6—C1—C2—C3   | 0.0 (5)    | C11—C12—C13—C14 | 178.7 (3)   |
| C1—C2—C3—C4   | 1.1 (5)    | C12—C13—C14—C15 | 1.2 (5)     |
| C1—C2—C3—S1   | -174.7 (3) | C13—C14—C15—C16 | -0.3 (6)    |
| O2—S1—C3—C4   | 27.0 (3)   | C14—C15—C16—C17 | -0.3 (6)    |
| O1—S1—C3—C4   | -100.4 (3) | C15—C16—C17—C12 | -0.1 (6)    |
| C10—S1—C3—C4  | 143.5 (3)  | C13—C12—C17—C16 | 1.0 (5)     |
| O2—S1—C3—C2   | -157.1 (3) | C11—C12—C17—C16 | -179.3 (3)  |
| O1—S1—C3—C2   | 75.5 (3)   | C8—C9—O5—C18    | -150.0 (17) |
| C10—S1—C3—C2  | -40.6 (3)  | C9—O5—C18—O6    | -21 (3)     |
| C2—C3—C4—C5   | -1.2 (5)   | C9—O5—C18—C19   | 167 (4)     |
| S1—C3—C4—C5   | 174.7 (3)  | O6—C18—C19—C20  | -158 (6)    |
| C3—C4—C5—C6   | 0.2 (5)    | O5—C18—C19—C20  | 13 (9)      |
| C2—C1—C6—C5   | -0.9 (5)   | O6—C18—C19—C24  | 19 (8)      |
| C2—C1—C6—C7   | 179.6 (3)  | O5—C18—C19—C24  | -170 (5)    |
| C4—C5—C6—C1   | 0.8 (5)    | C24—C19—C20—C21 | -3 (10)     |
| C4—C5—C6—C7   | -179.7 (3) | C18—C19—C20—C21 | 174 (4)     |
| C1—C6—C7—F1   | -143.7 (3) | C19—C20—C21—C22 | 4 (7)       |
| C5—C6—C7—F1   | 36.8 (4)   | C20—C21—C22—C23 | 0 (4)       |
| C1—C6—C7—C8   | 95.6 (4)   | C21—C22—C23—C24 | -5 (5)      |



|                     |             |                         |             |
|---------------------|-------------|-------------------------|-------------|
| C5—C6—C7—C8         | -84.0 (4)   | C22—C23—C24—C19         | 5 (6)       |
| C11—O3—C8—C9        | 133.9 (3)   | C20—C19—C24—C23         | -1 (9)      |
| C11—O3—C8—C7        | -105.5 (3)  | C18—C19—C24—C23         | -179 (5)    |
| F1—C7—C8—O3         | -60.9 (3)   | C8—C9—O5A—C18A          | -152.6 (12) |
| C6—C7—C8—O3         | 60.0 (4)    | C9—O5A—C18A—O6A         | 17 (2)      |
| F1—C7—C8—C9         | 57.7 (4)    | C9—O5A—C18A—C19A        | -166 (3)    |
| C6—C7—C8—C9         | 178.6 (3)   | O6A—C18A—C19A—<br>C20A  | -166 (4)    |
| O3—C8—C9—O5         | -55.3 (12)  | O5A—C18A—C19A—<br>C20A  | 17 (6)      |
| C7—C8—C9—O5         | -175.0 (12) | O6A—C18A—C19A—<br>C24A  | 14 (6)      |
| O3—C8—C9—O5A        | -67.4 (9)   | O5A—C18A—C19A—<br>C24A  | -164 (3)    |
| C7—C8—C9—O5A        | 173.0 (8)   | C24A—C19A—C20A—<br>C21A | 3 (7)       |
| C8—O3—C11—O4        | 0.8 (4)     | C18A—C19A—C20A—<br>C21A | -178 (3)    |
| C8—O3—C11—C12       | -179.4 (3)  | C19A—C20A—C21A—<br>C22A | -3 (5)      |
| O4—C11—C12—<br>C17  | -177.7 (3)  | C20A—C21A—C22A—<br>C23A | 1 (3)       |
| O3—C11—C12—<br>C17  | 2.5 (4)     | C21A—C22A—C23A—<br>C24A | 2 (3)       |
| O4—C11—C12—<br>C13  | 2.0 (5)     | C20A—C19A—C24A—<br>C23A | 1 (6)       |
| O3—C11—C12—<br>C13  | -177.8 (3)  | C18A—C19A—C24A—<br>C23A | -179 (3)    |
| C17—C12—C13—<br>C14 | -1.5 (5)    | C22A—C23A—C24A—<br>C19A | -3 (4)      |

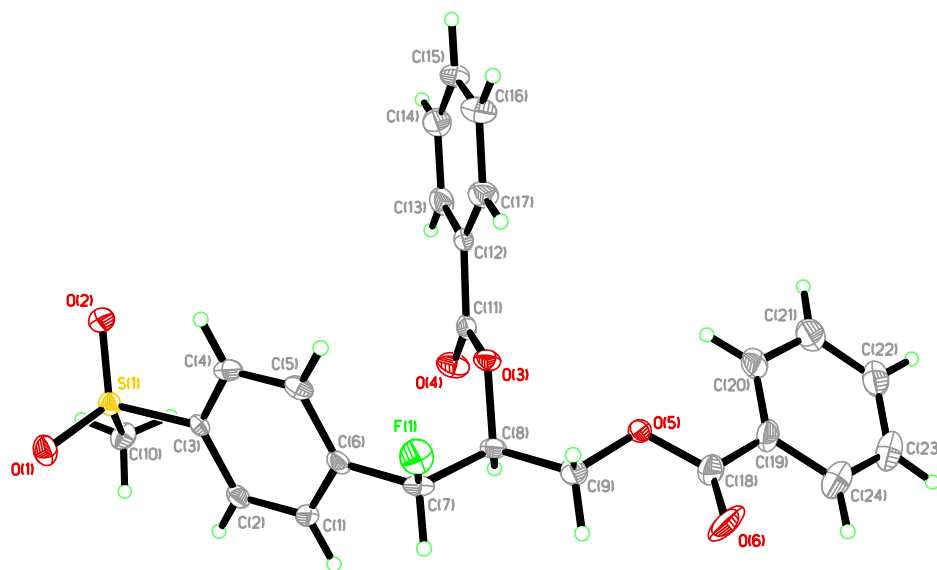

**Figure S14.** Perspective views showing 50% probability displacement

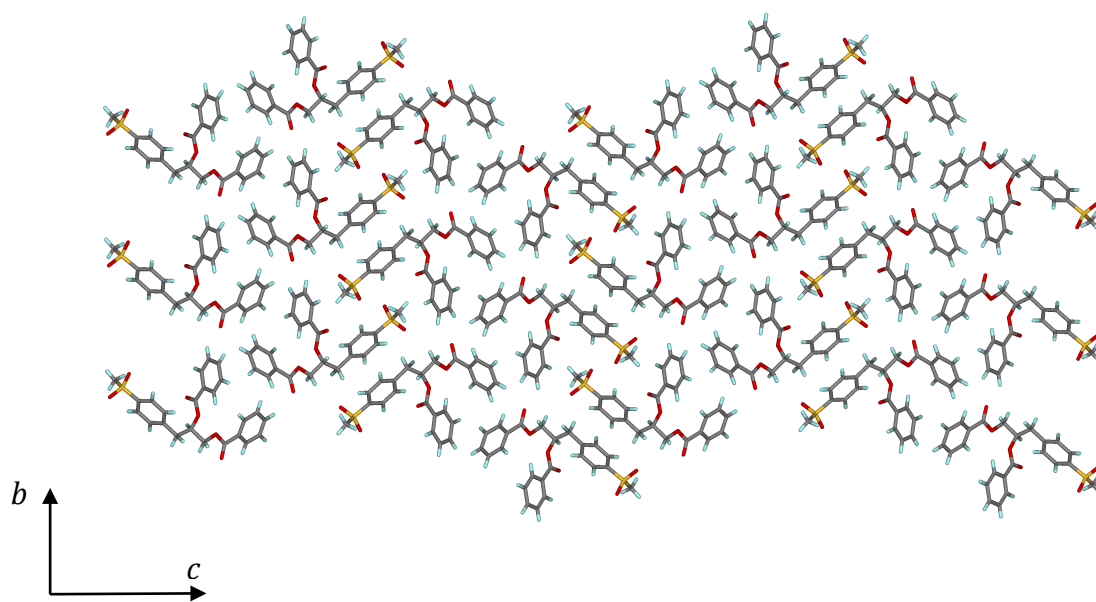

**Figure S15.** Three-dimensional supramolecular architecture viewed along the *a*-axis direction.

### Supplementary Information References.

1. Gasparini, F.; Inderbitzin, W.; Francotte, E.; Lecis, G.; Richert, P.; Dragic, Z.; Kuhn, R.; Flor, P. *J. Bioorganic & Medicinal Chemistry Letters* **2000**, *10*, 1241.
2. Hackenberger, D.; Song, B.; Gruenberg, M. F.; Farsadpour, S.; Menges, F.; Kelm, H.; Gross, C.; Wolff, T.; Niedner-Schatteburg, G.; Thiel, W. R.; Goossen, L. J. *ChemCatChem* **2015**, *7*, 3579.
3. Li, J-Q; Liu, J.; Krajangsri, S.; Chumnanvej, N.; Singh, T.; Andersson, P. G. *ACS Catalysis* **2016**, *6*, 8342.
4. Chen, C.; Jin, S.; Zhang, Z.; Wei, B.; Wang, H.; Zhang, K.; Lv, H.; Dong, X-H; Zhang, X. *J. Am. Chem. Soc.* **2016**, *138*, 9017.
5. Pankova, A. S.; Sorokina, M. V.; Kuznetsov, M. A. *Tetrahedron Letters* **2015**, *56*, 5381.
6. Banner, D.; Haap, W.; Kuhn, B.; Luebbers, T.; Peters, J-U; Schulz-Gasch, T. *PCT Int. Appl.*, 2013076063, 30 May 2013.
7. Catalano, J. G.; Deaton, D. N.; Furfine, E. S.; Hassell, A. M.; McFayden, R. B.; Miller, A. B.; Miller, L. R.; Shewchuk, L. M.; Willard Jr., D. H.; Wright, L. L. *Bioorganic & Medicinal Chemistry Letters*, **2004**, *14*, 275.
8. Belanger, G.; Levesque, F.; Paquet, J.; Barbe, G. *J. Org. Chem.* **2005**, *70*, 291.
9. Li, F.; Wang, Z-H; Zhao, L.; Xiong, F-J; He, Q-Q; Chen, F-E *Tetrahedron: Asymmetry* **2011**, *22*, 1337.
10. Banik, S. M.; Medley, J. W.; Jacobsen, E. N. **2016**, *353*, 51.
11. Bruker AXS APEX3, Bruker AXS, Madison, Wisconsin, **2016**.
12. Sheldrick, G. M. *Acta Cryst.* **2015**, *A71*, 3
13. Sheldrick, G. M. *Acta Cryst.* **2015**, *C71*, 3.
14. Dolomanov, O. V.; Bourhis, L. J.; Gildea, R. J.; Howard, J. A. K.; Puschmann, H. *J. Appl. Cryst.* **2009**, *42*, 339.
15. Accelrys DS Visualizer v2.0.1, Accelrys Software. Inc., **2007**.

**<sup>1</sup>H NMR**  
**500 MHz**  
**CDCl<sub>3</sub>**

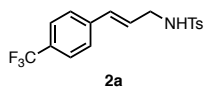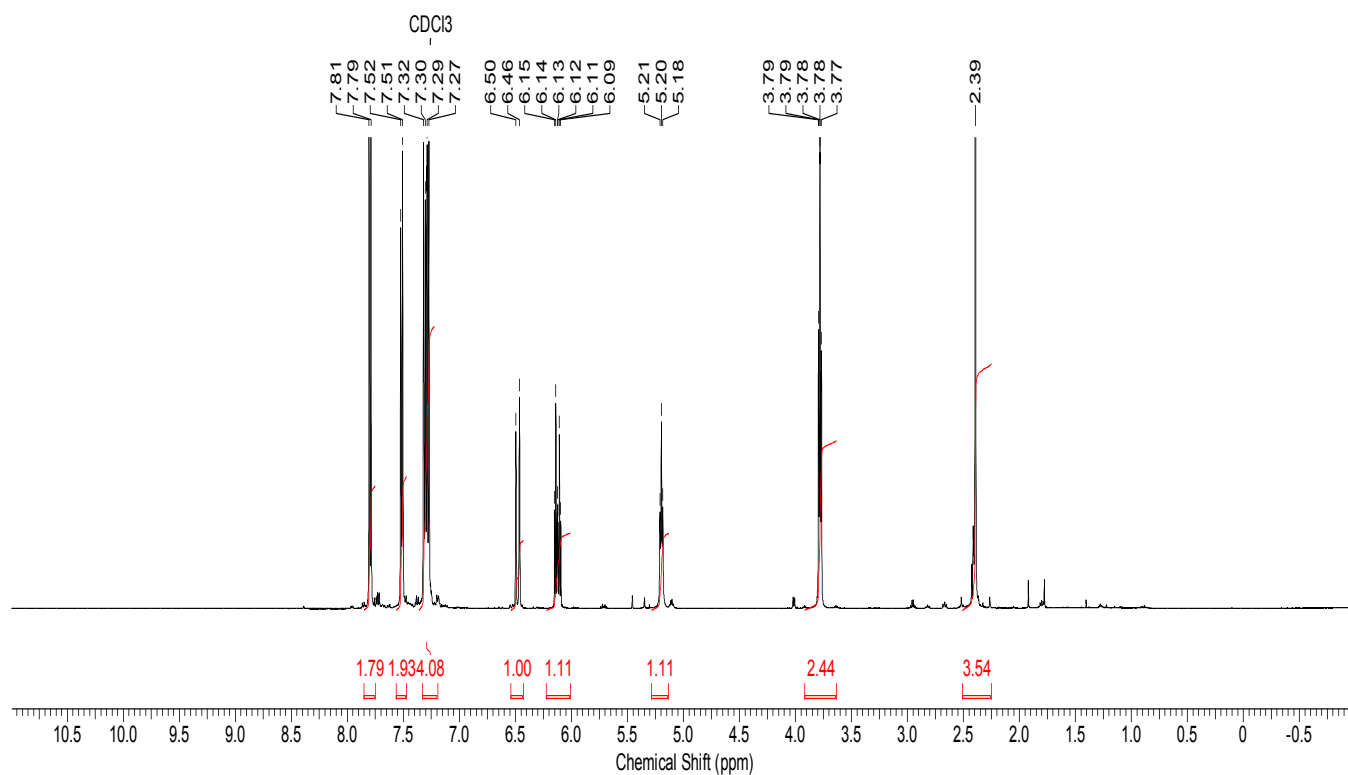

**<sup>13</sup>C NMR**  
**125.7 MHz**  
**CDCl<sub>3</sub>**

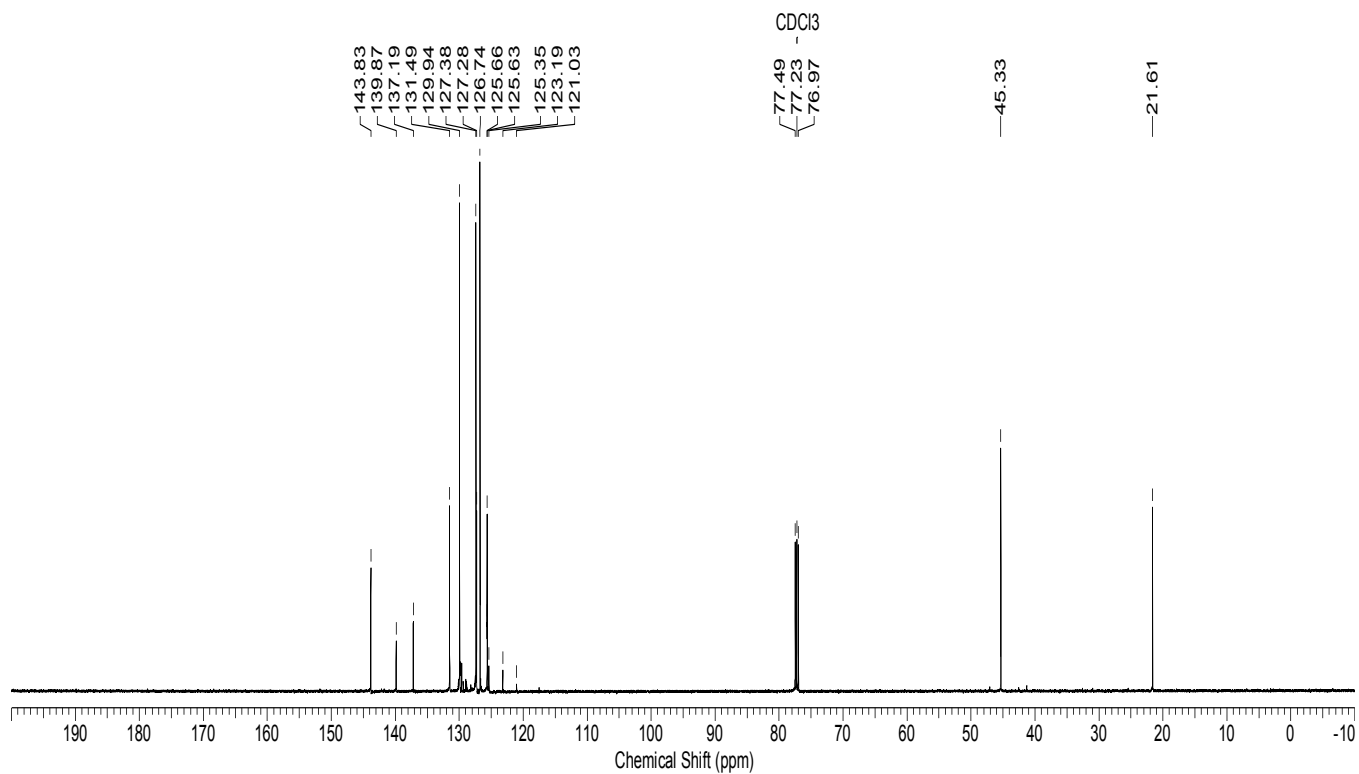

**$^{19}\text{F}$  NMR**  
**470.4 MHz**  
 **$\text{CDCl}_3$**

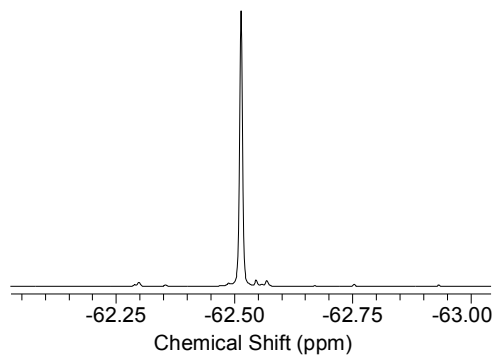

**<sup>1</sup>H NMR**  
**500 MHz**  
**CDCl<sub>3</sub>**

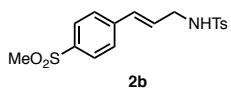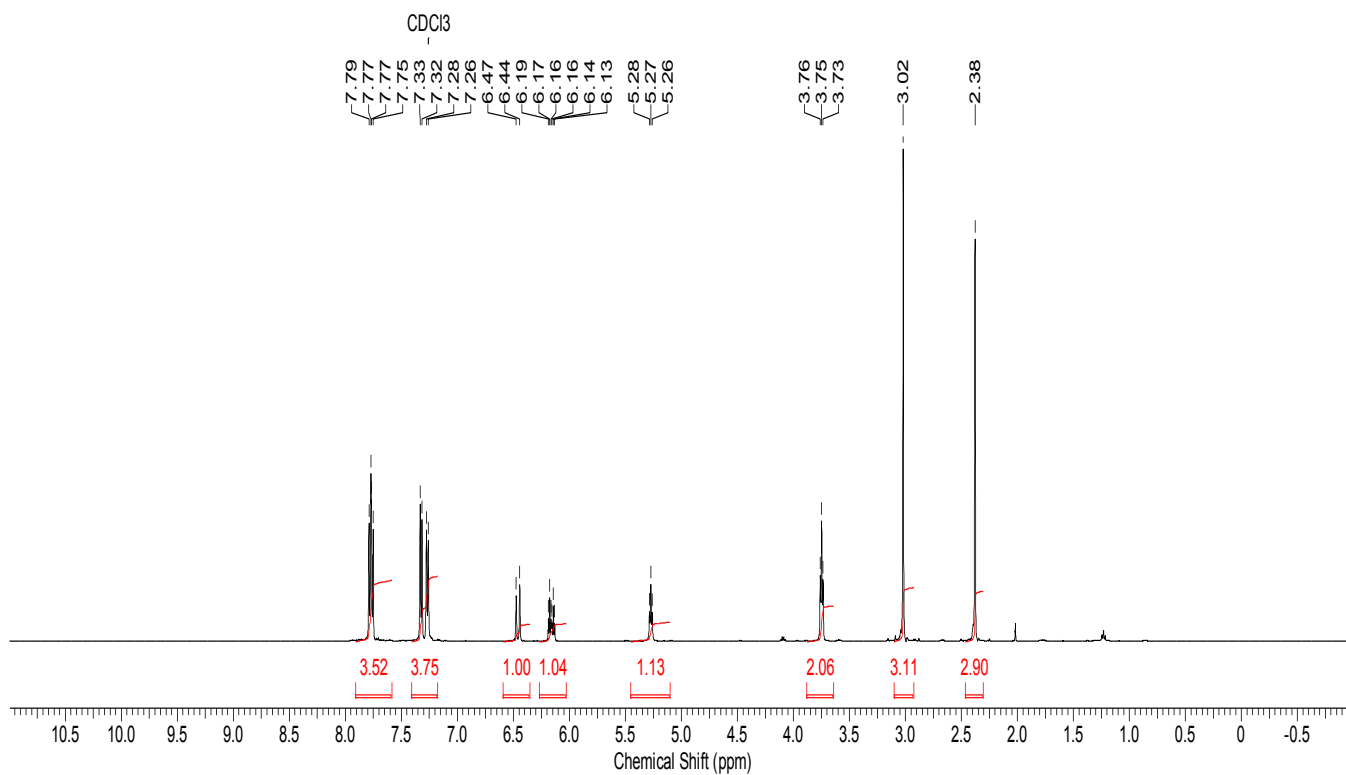

**<sup>13</sup>C NMR**  
**125.7 MHz**  
**CDCl<sub>3</sub>**

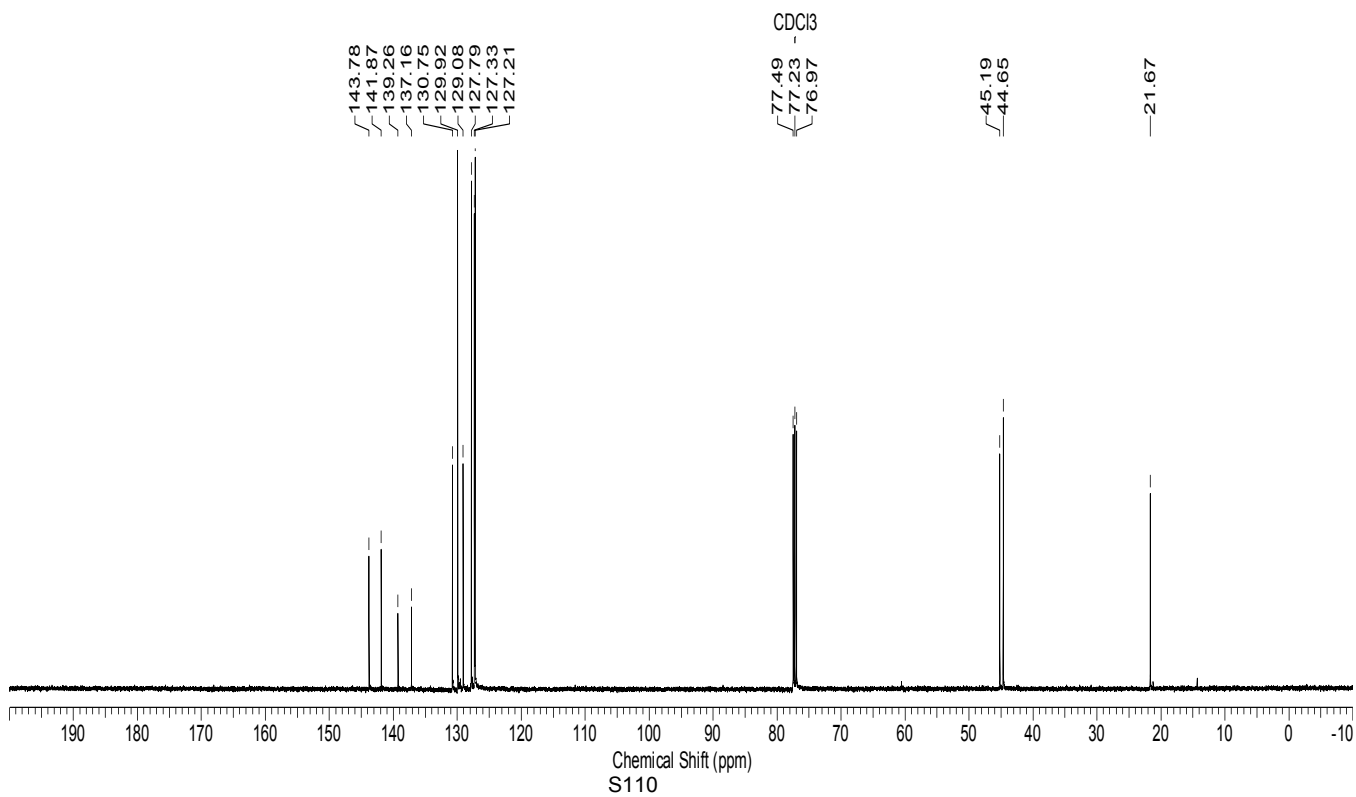

**<sup>1</sup>H NMR**  
**500 MHz**  
**CDCl<sub>3</sub>**

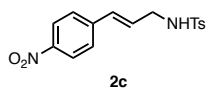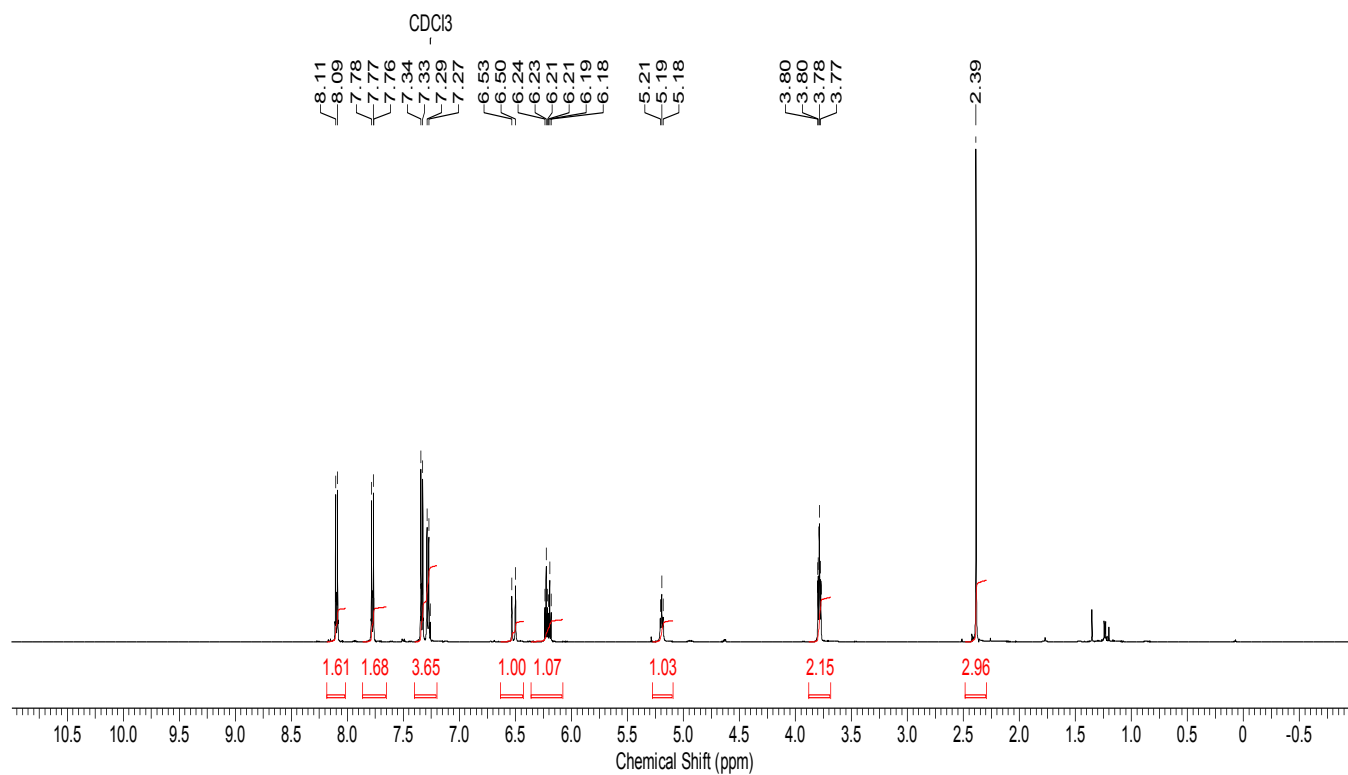

**<sup>13</sup>C NMR**  
**125.7 MHz**  
**CDCl<sub>3</sub>**

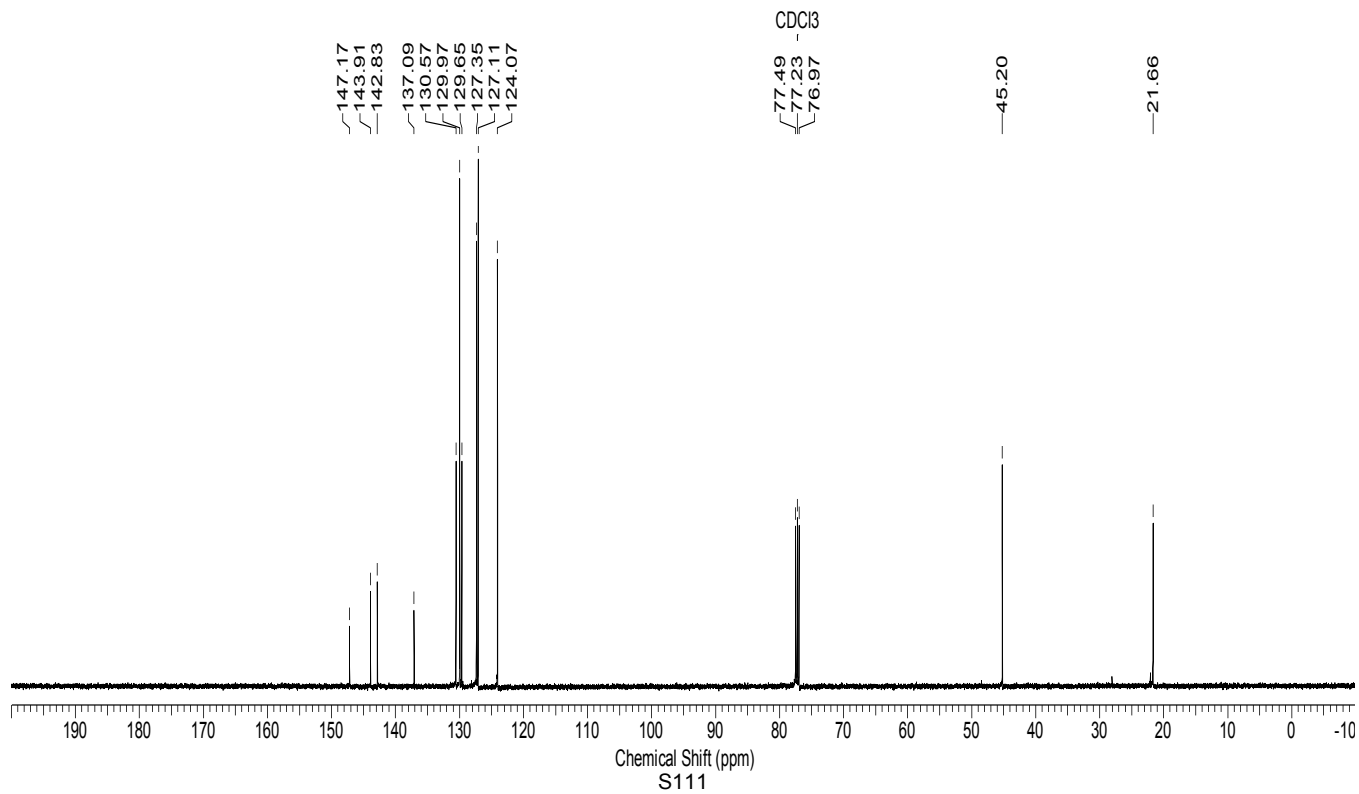

**<sup>1</sup>H NMR**  
**500 MHz**  
**CDCl<sub>3</sub>**

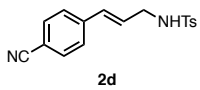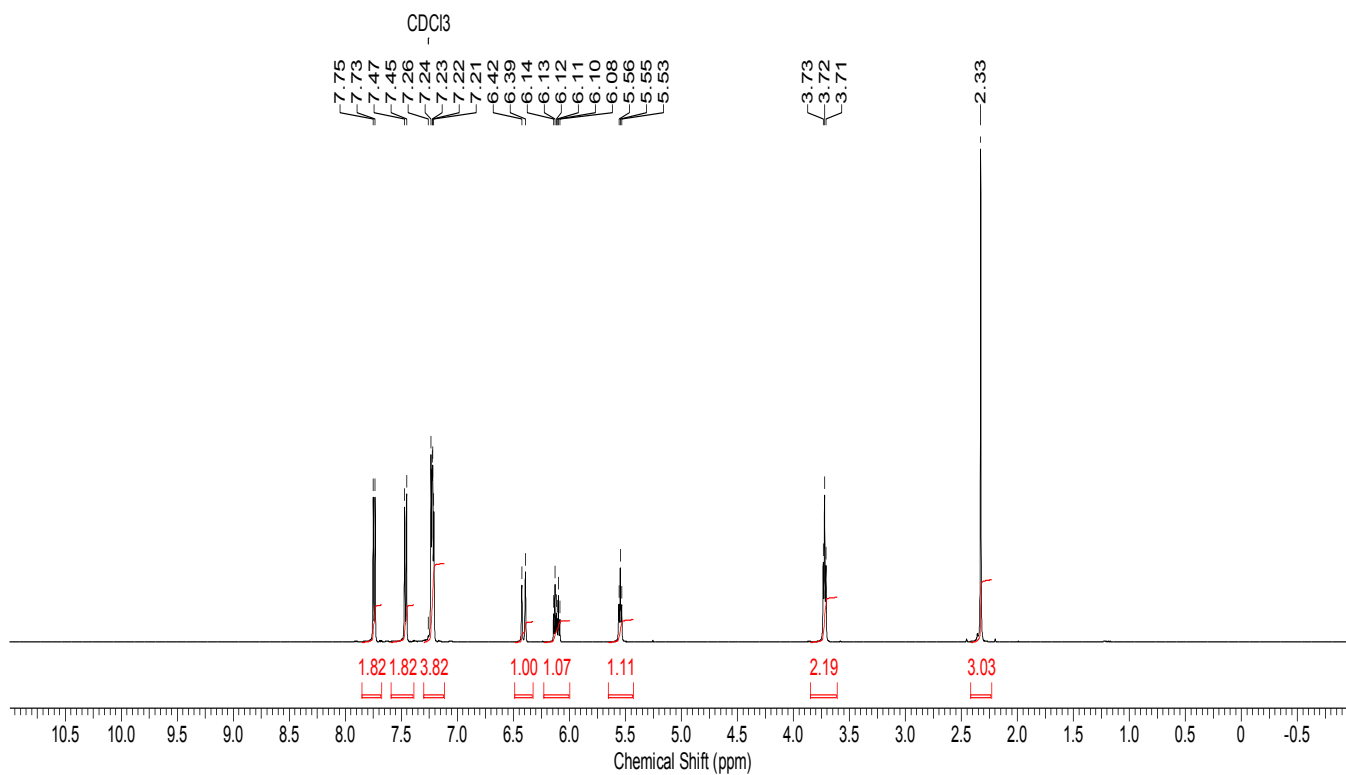

**<sup>13</sup>C NMR**  
**125.7 MHz**  
**CDCl<sub>3</sub>**

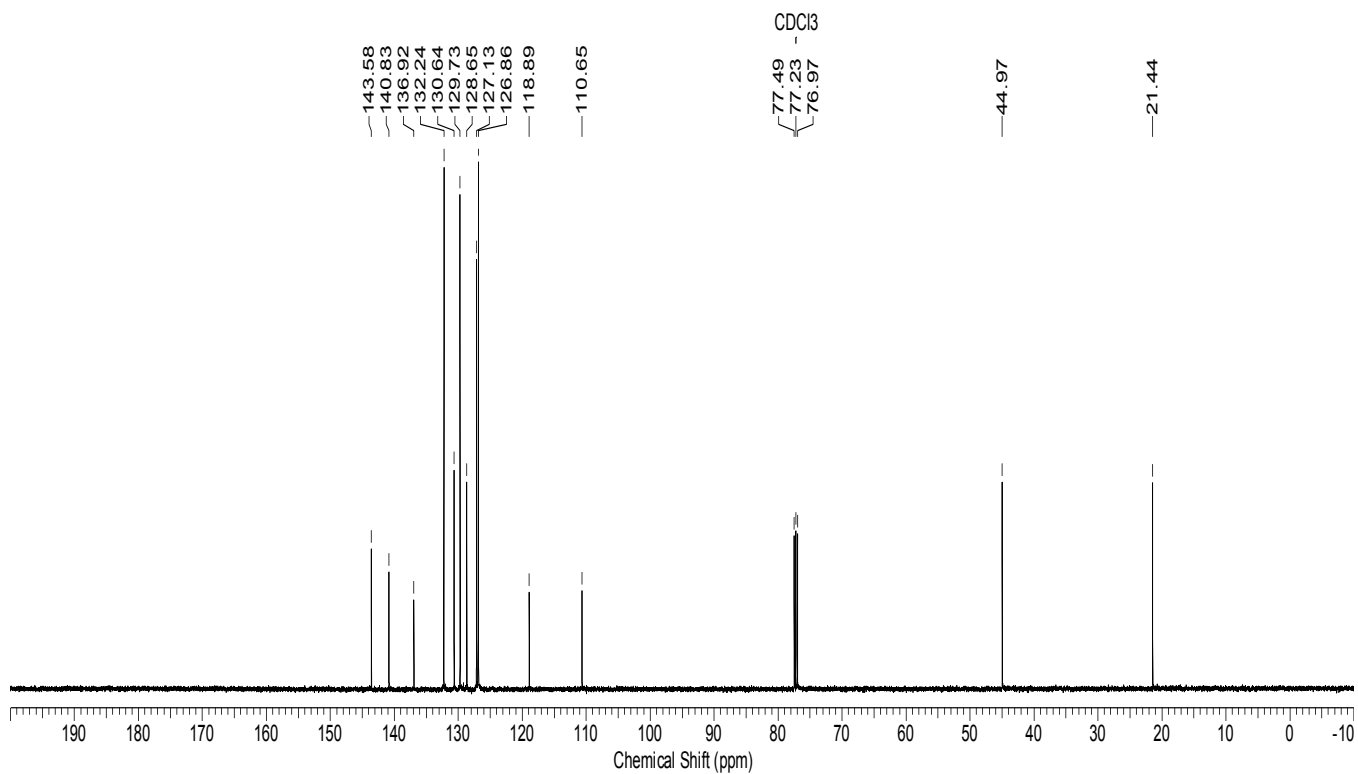



**<sup>1</sup>H NMR**  
**500 MHz**  
**CDCl<sub>3</sub>**

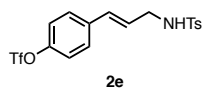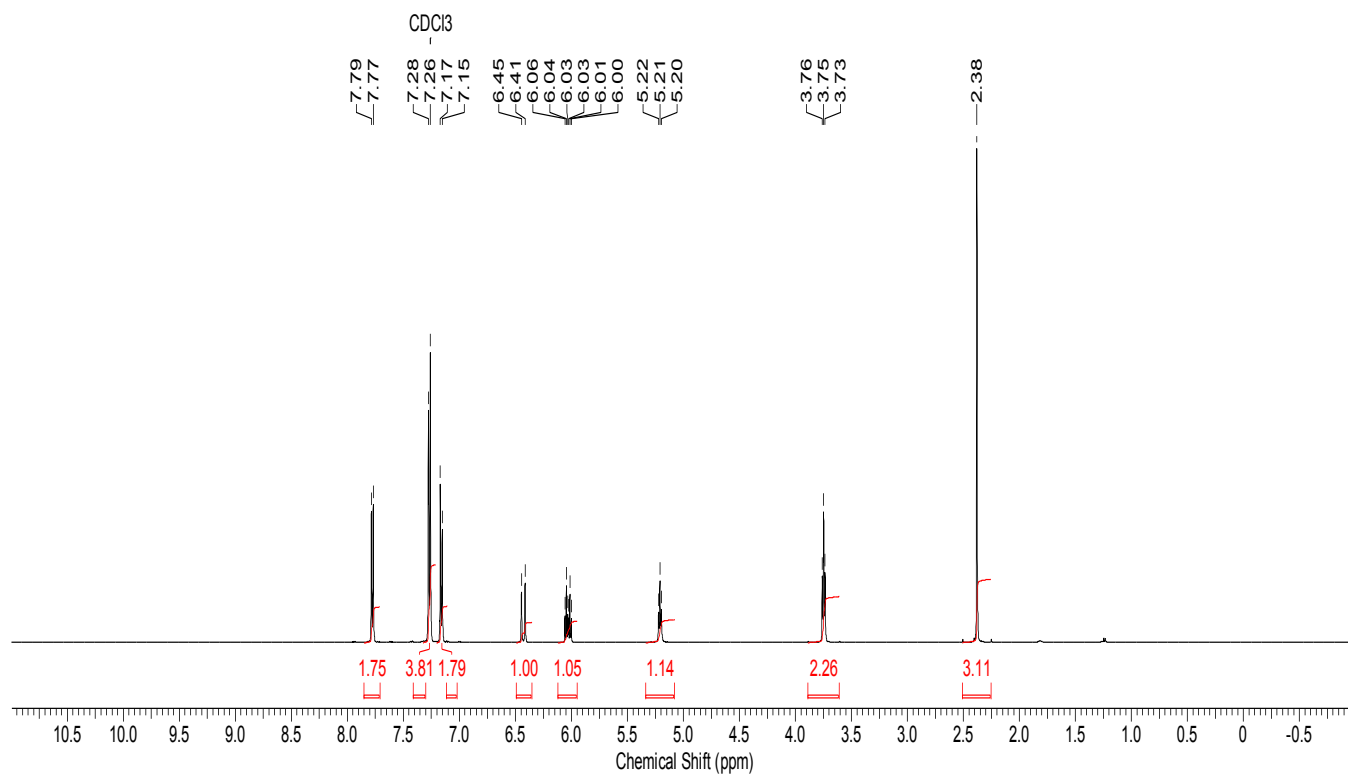

**<sup>13</sup>C NMR**  
**125.7 MHz**  
**CDCl<sub>3</sub>**

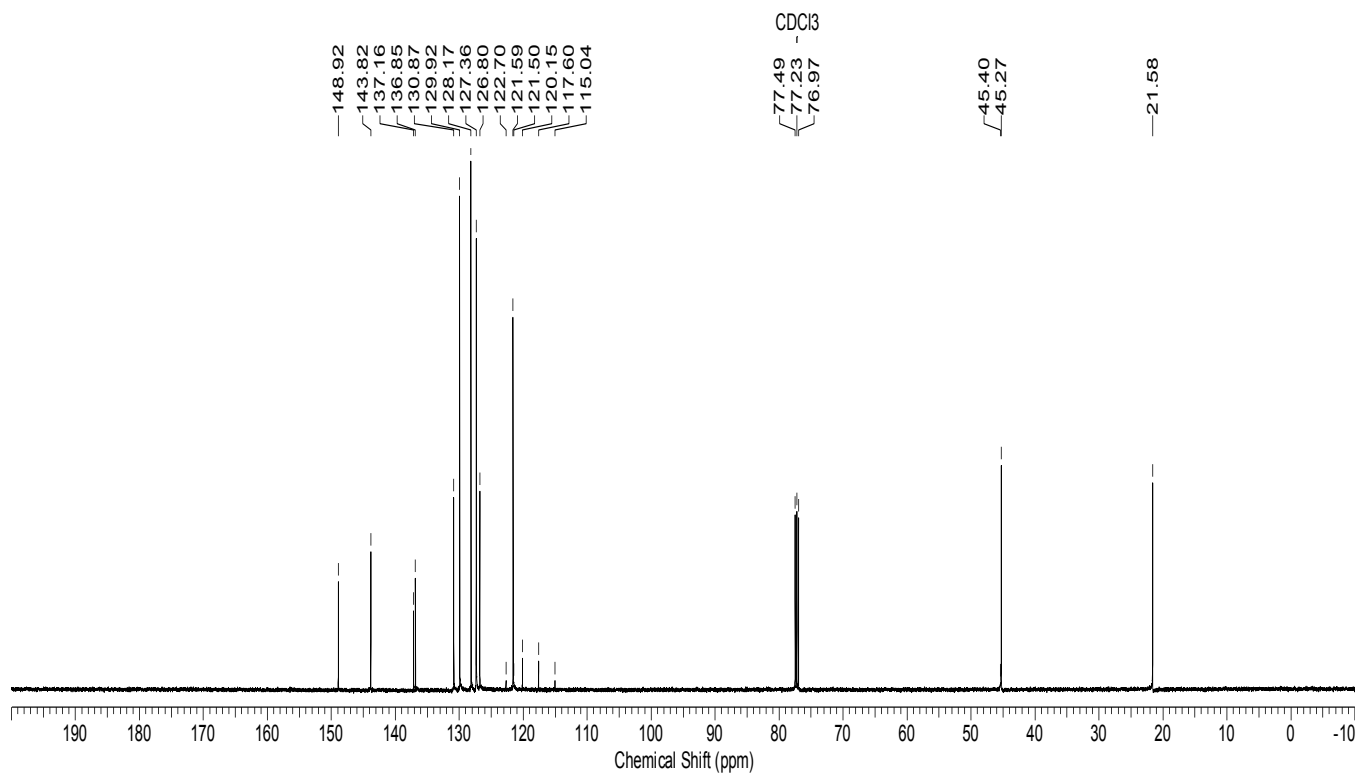

**$^{19}\text{F}$  NMR**  
**470.4 MHz**  
 **$\text{CDCl}_3$**

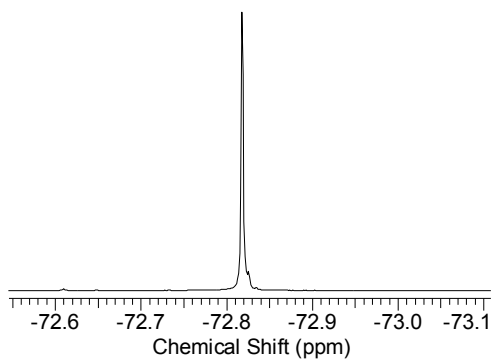

**<sup>1</sup>H NMR**  
**500 MHz**  
**CDCl<sub>3</sub>**

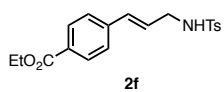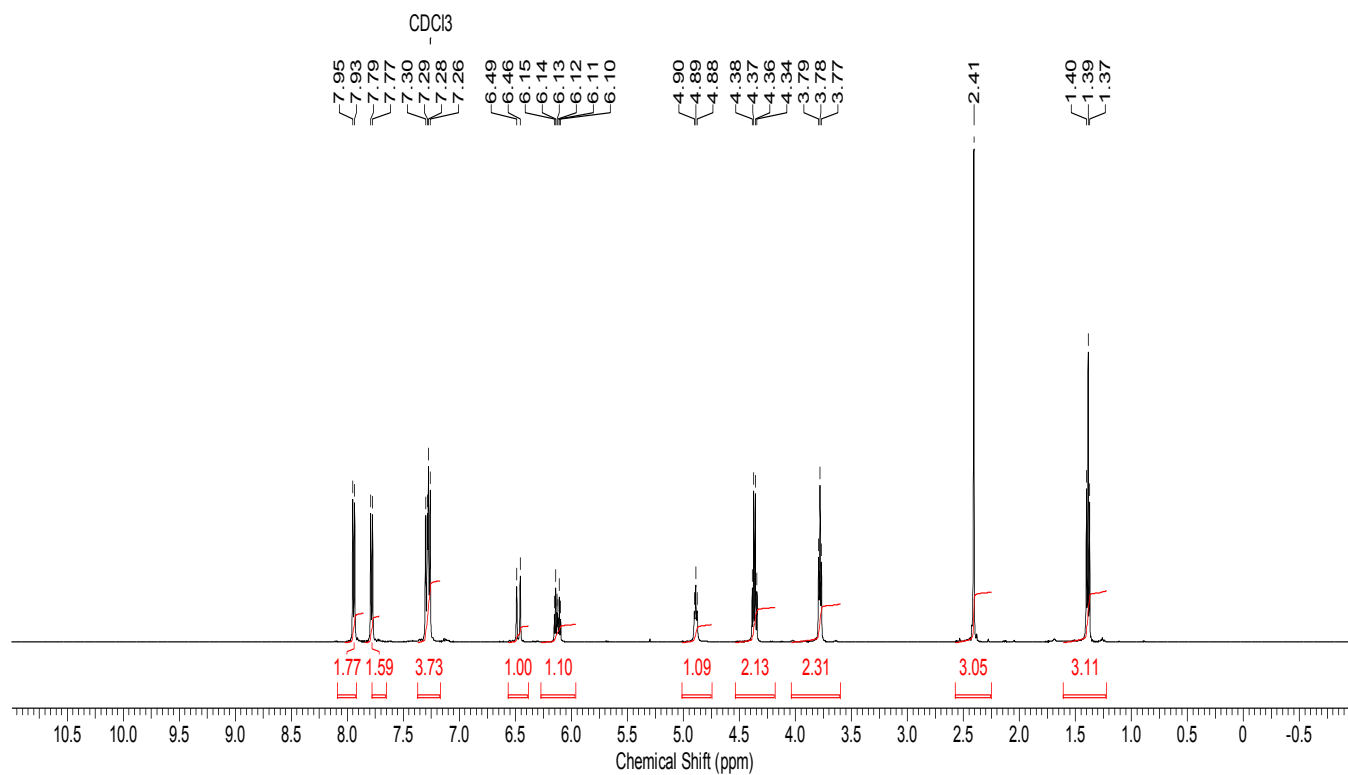

**<sup>13</sup>C NMR**  
**125.7 MHz**  
**CDCl<sub>3</sub>**

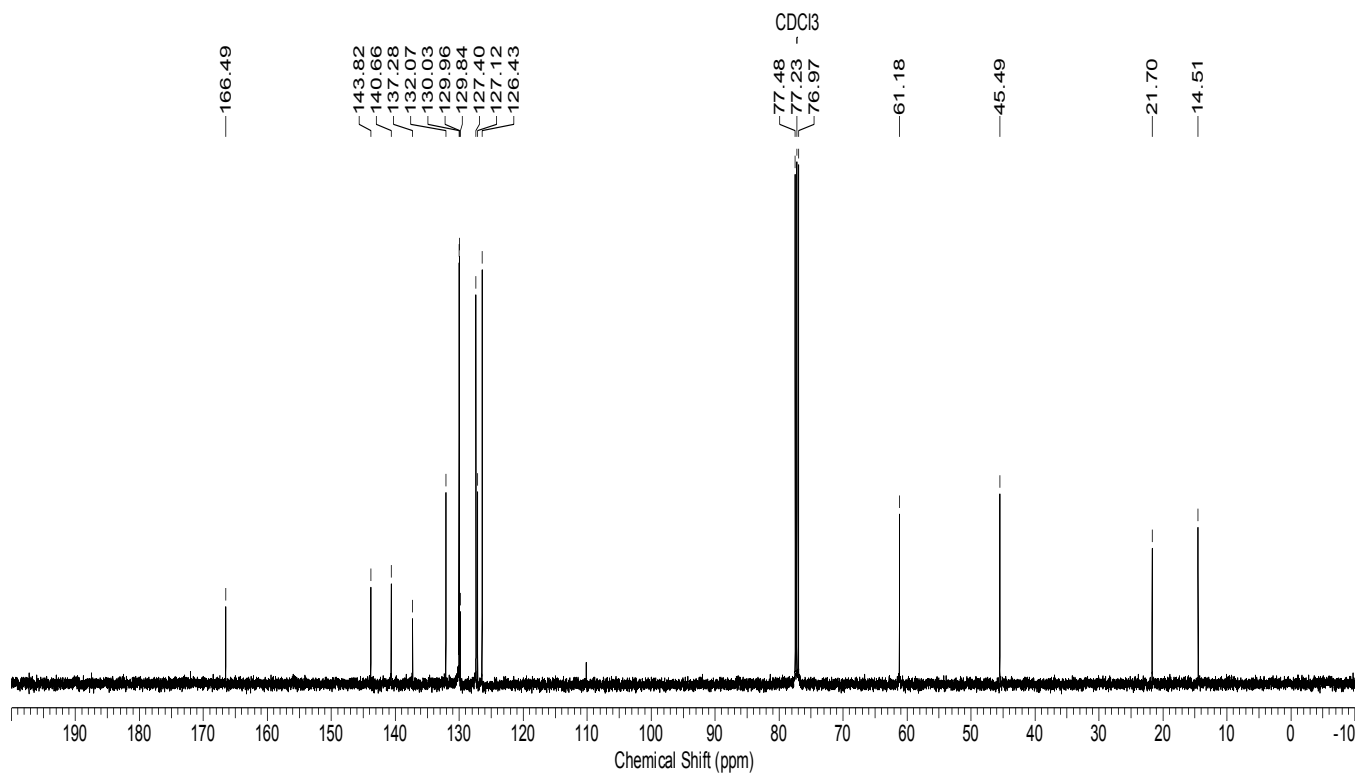

**<sup>1</sup>H NMR**  
**500 MHz**  
**CDCl<sub>3</sub>**

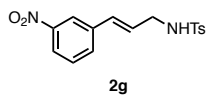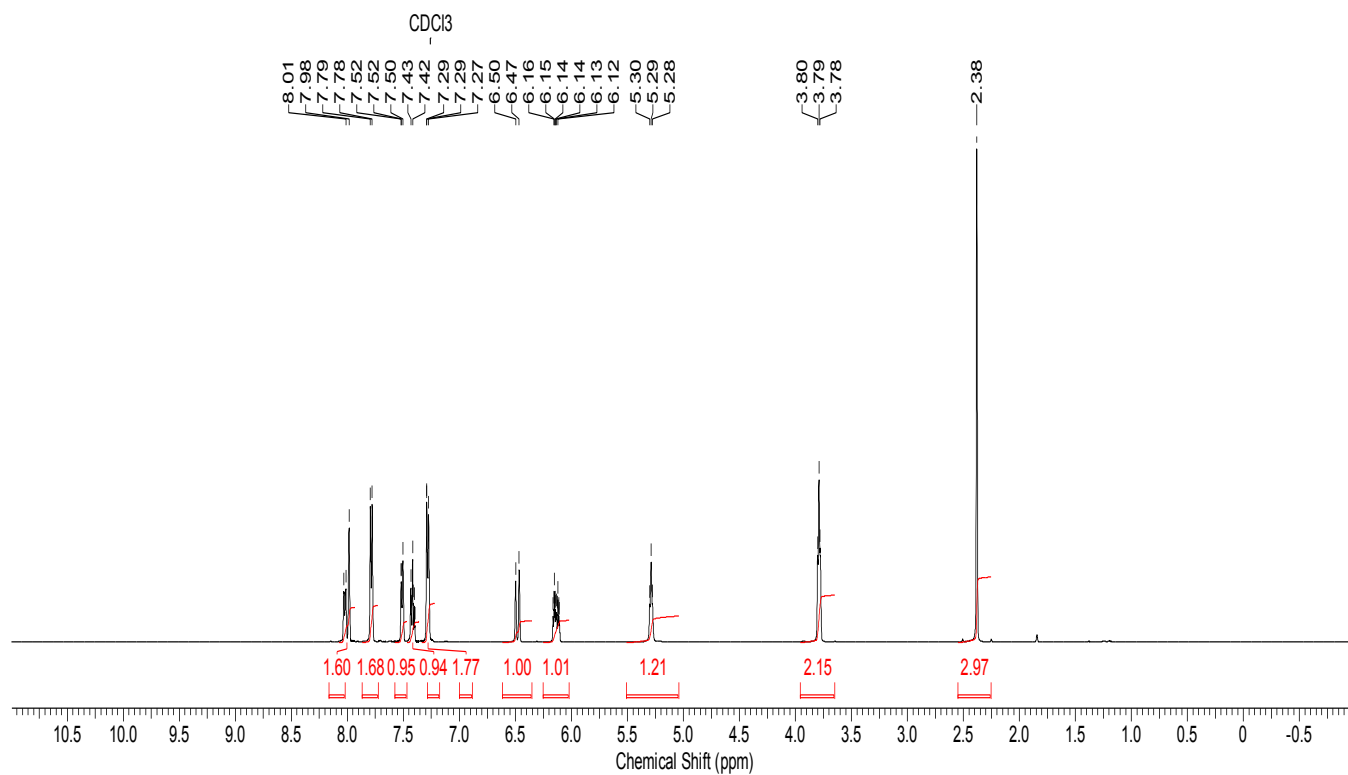

**<sup>13</sup>C NMR**  
**125.7 MHz**  
**CDCl<sub>3</sub>**

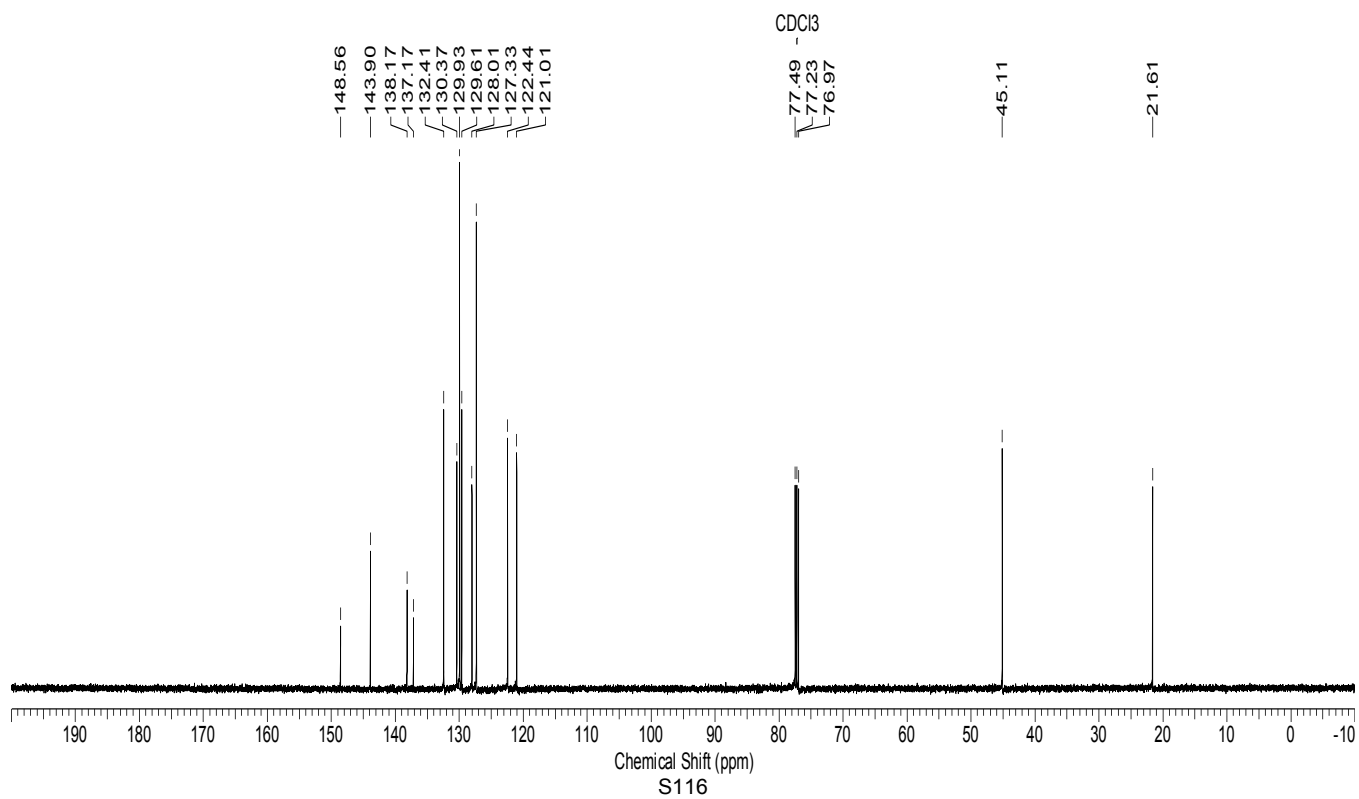

**<sup>1</sup>H NMR**  
**500 MHz**  
**CDCl<sub>3</sub>**

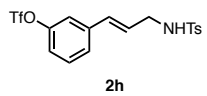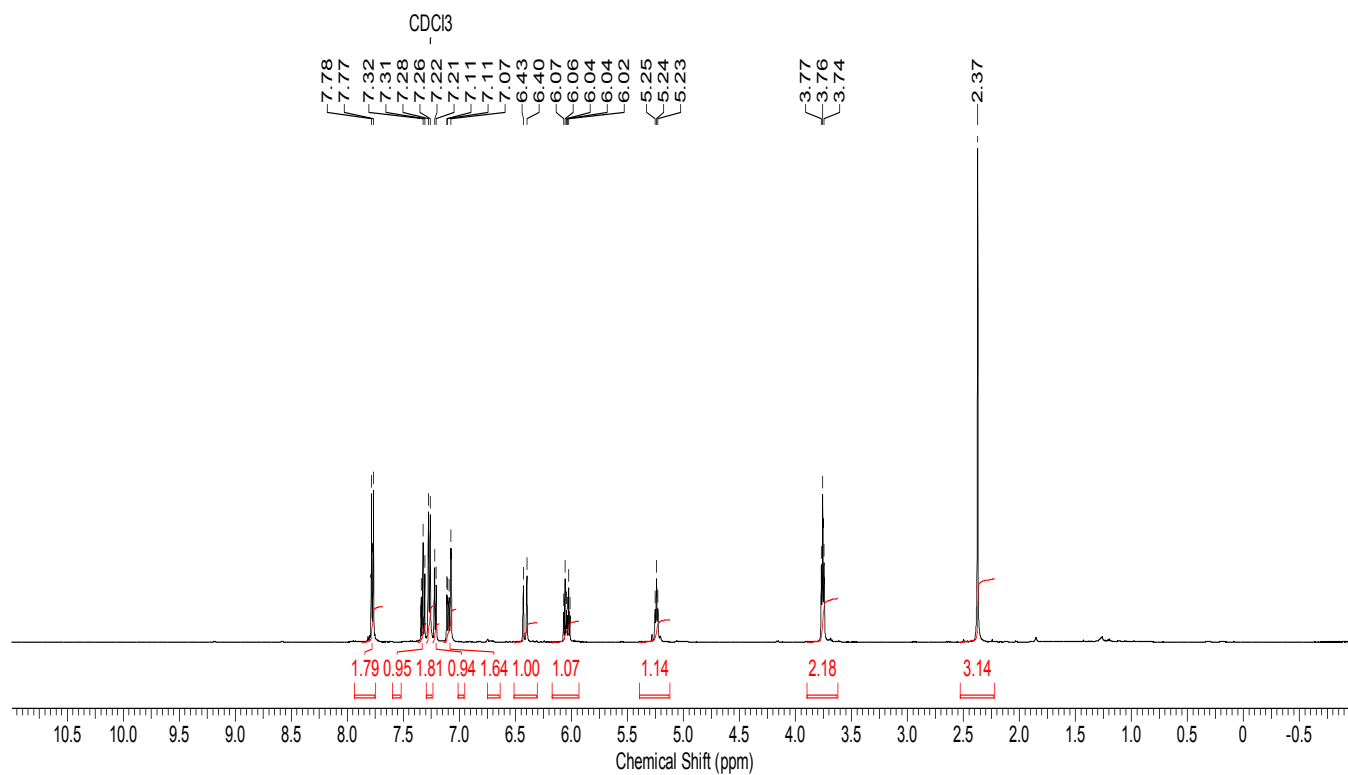

**<sup>13</sup>C NMR**  
**125.7 MHz**  
**CDCl<sub>3</sub>**

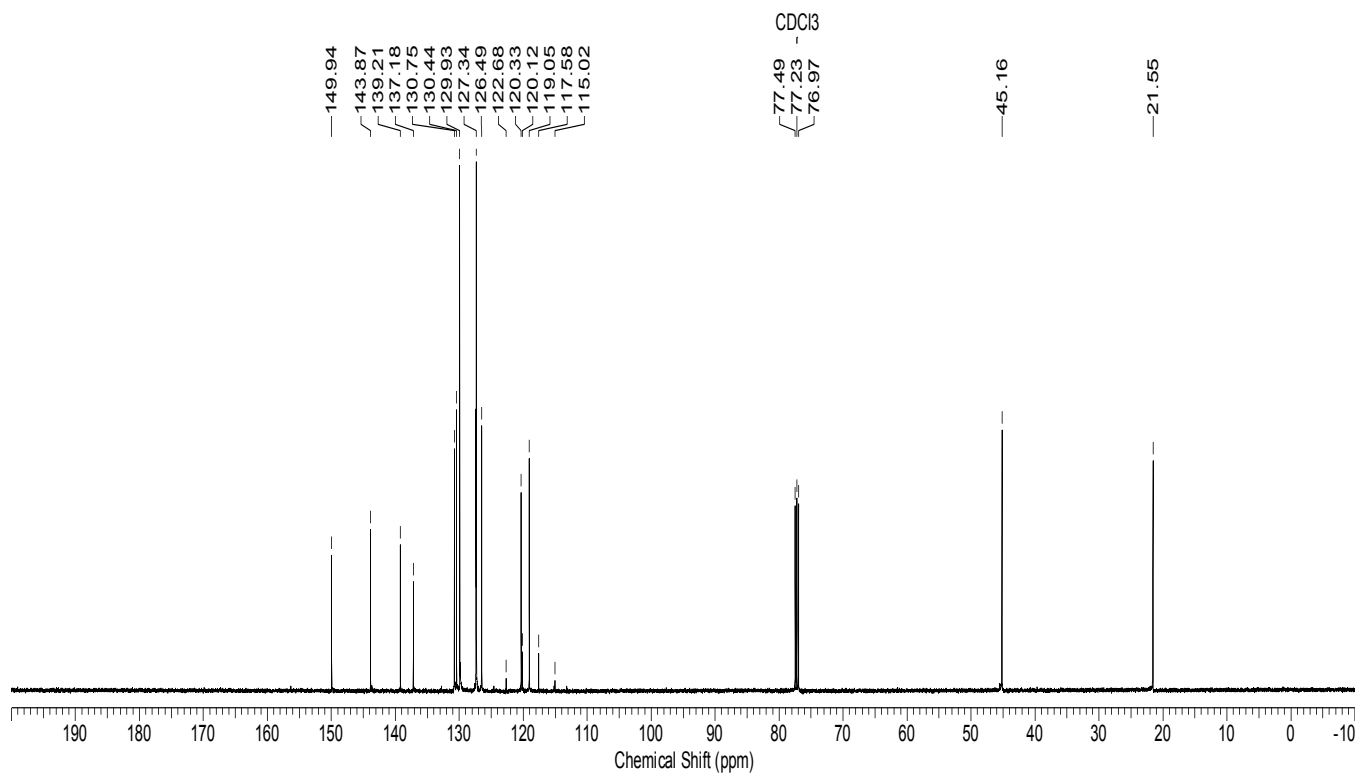

**$^{19}\text{F}$  NMR**  
**470.4 MHz**  
 **$\text{CDCl}_3$**

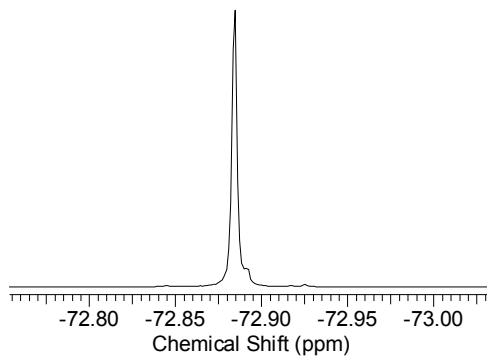

**<sup>1</sup>H NMR**  
**500 MHz**  
**CDCl<sub>3</sub>**

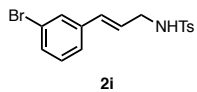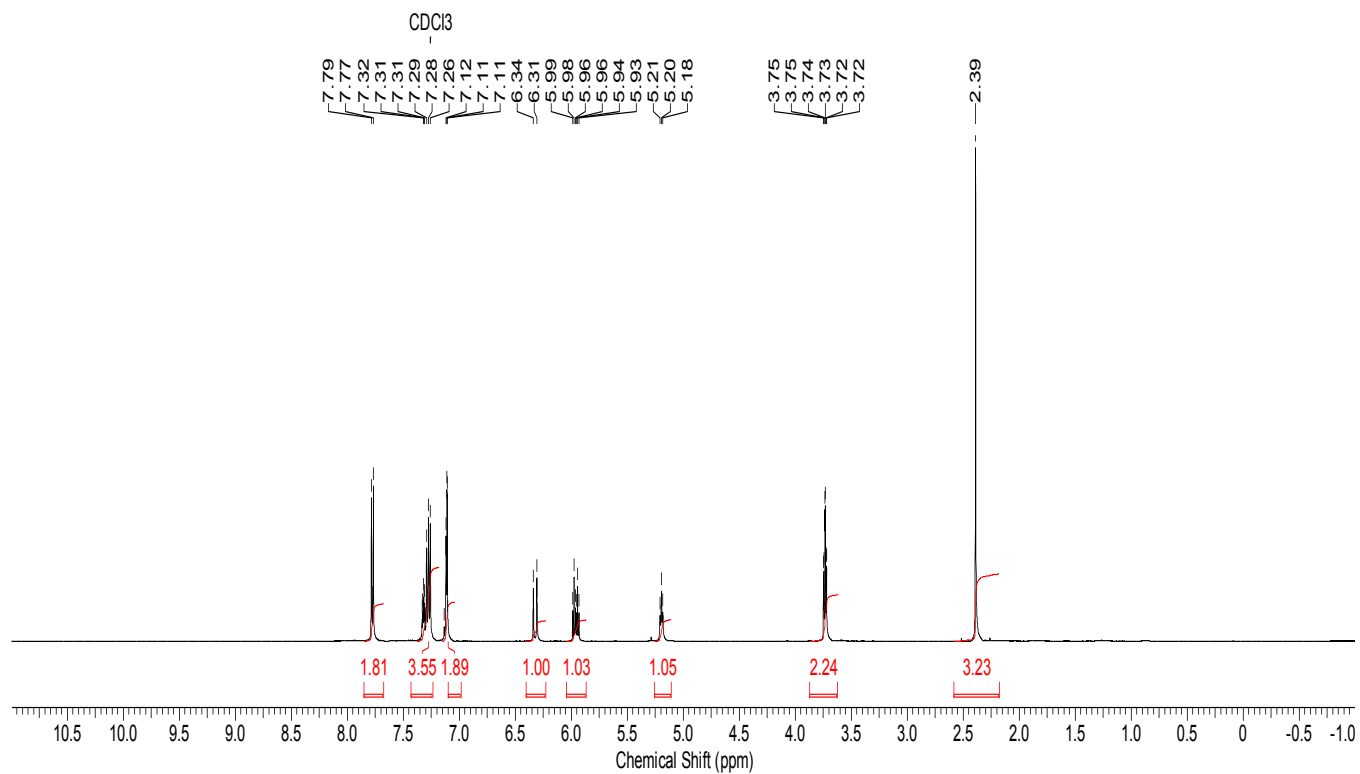

**<sup>13</sup>C NMR**  
**125.7 MHz**  
**CDCl<sub>3</sub>**

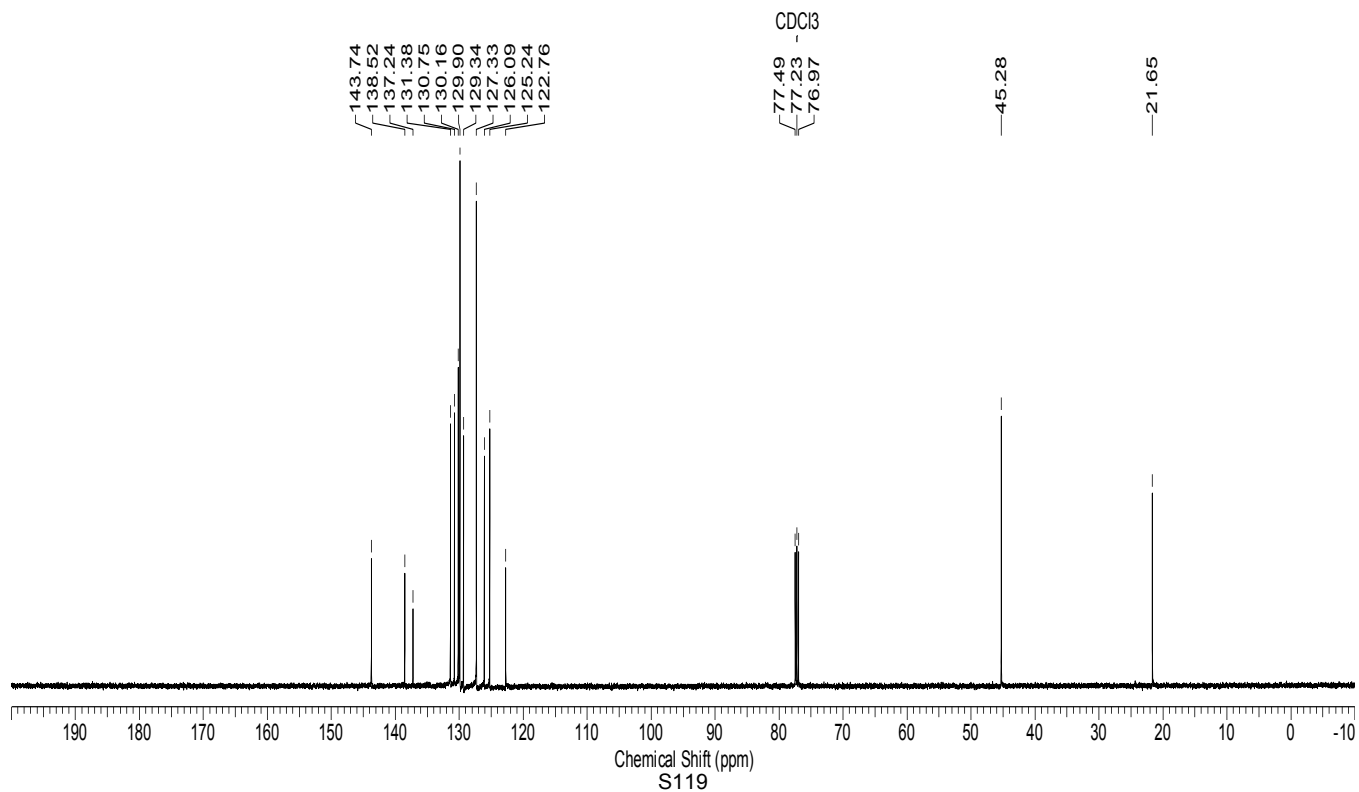

**<sup>1</sup>H NMR**  
**500 MHz**  
**CDCl<sub>3</sub>**

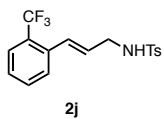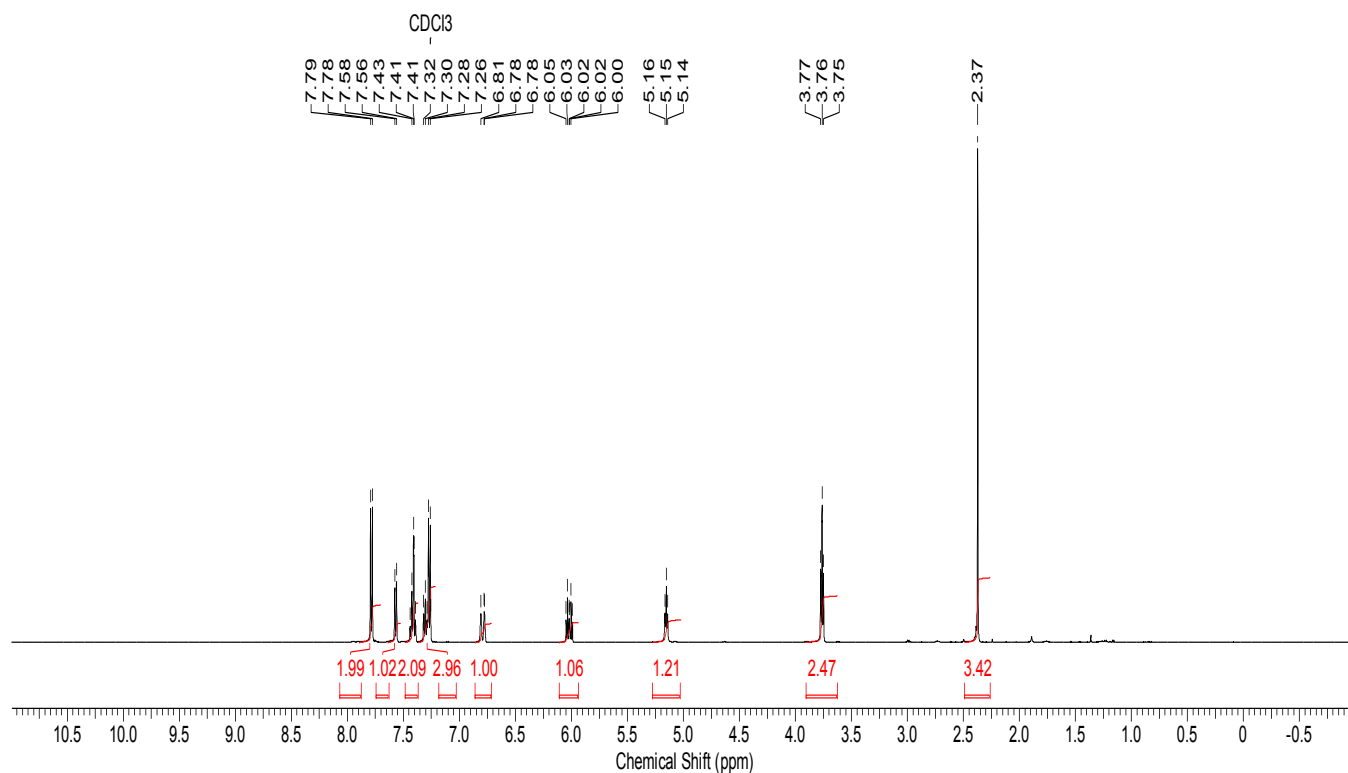

**<sup>13</sup>C NMR**  
**125.7 MHz**  
**CDCl<sub>3</sub>**

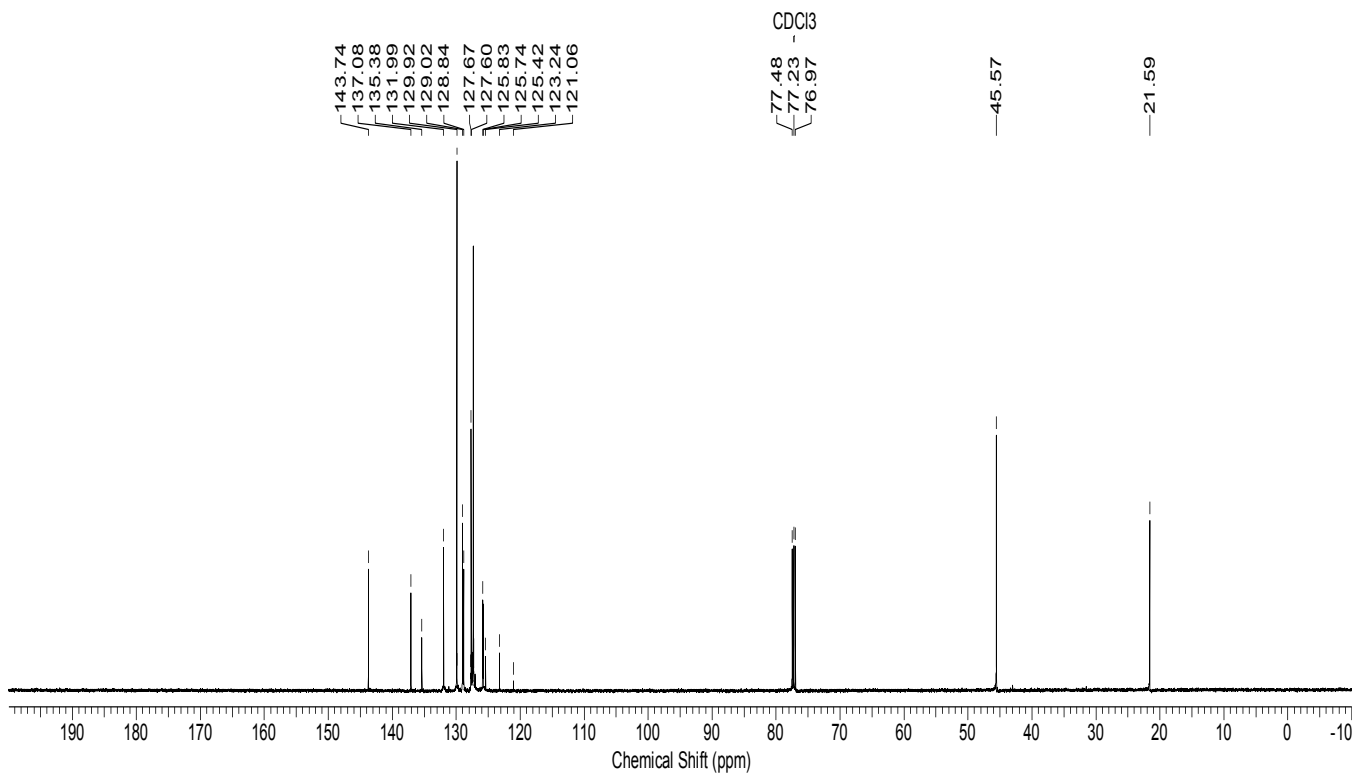



**$^{19}\text{F}$  NMR**  
**470.4 MHz**  
 **$\text{CDCl}_3$**

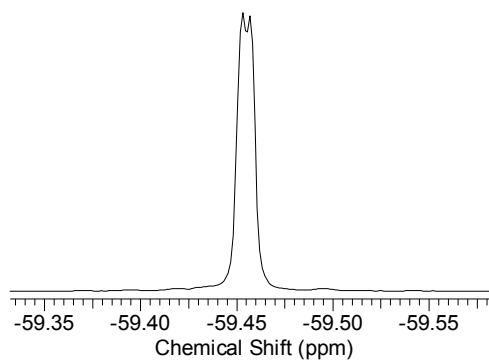

**<sup>1</sup>H NMR**  
**500 MHz**  
**DMSO-d<sub>6</sub>**

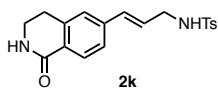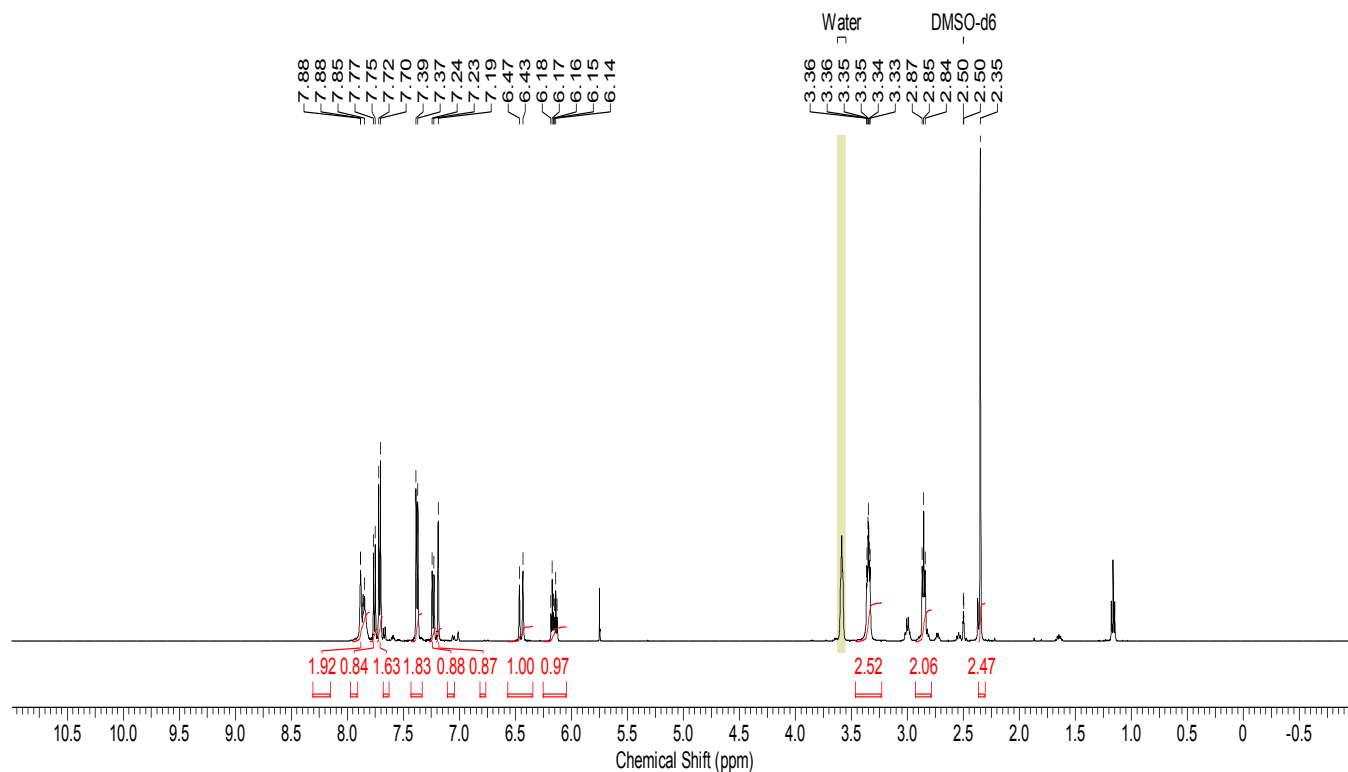

**<sup>13</sup>C NMR**  
**125.7 MHz**  
**DMSO-d<sub>6</sub>**

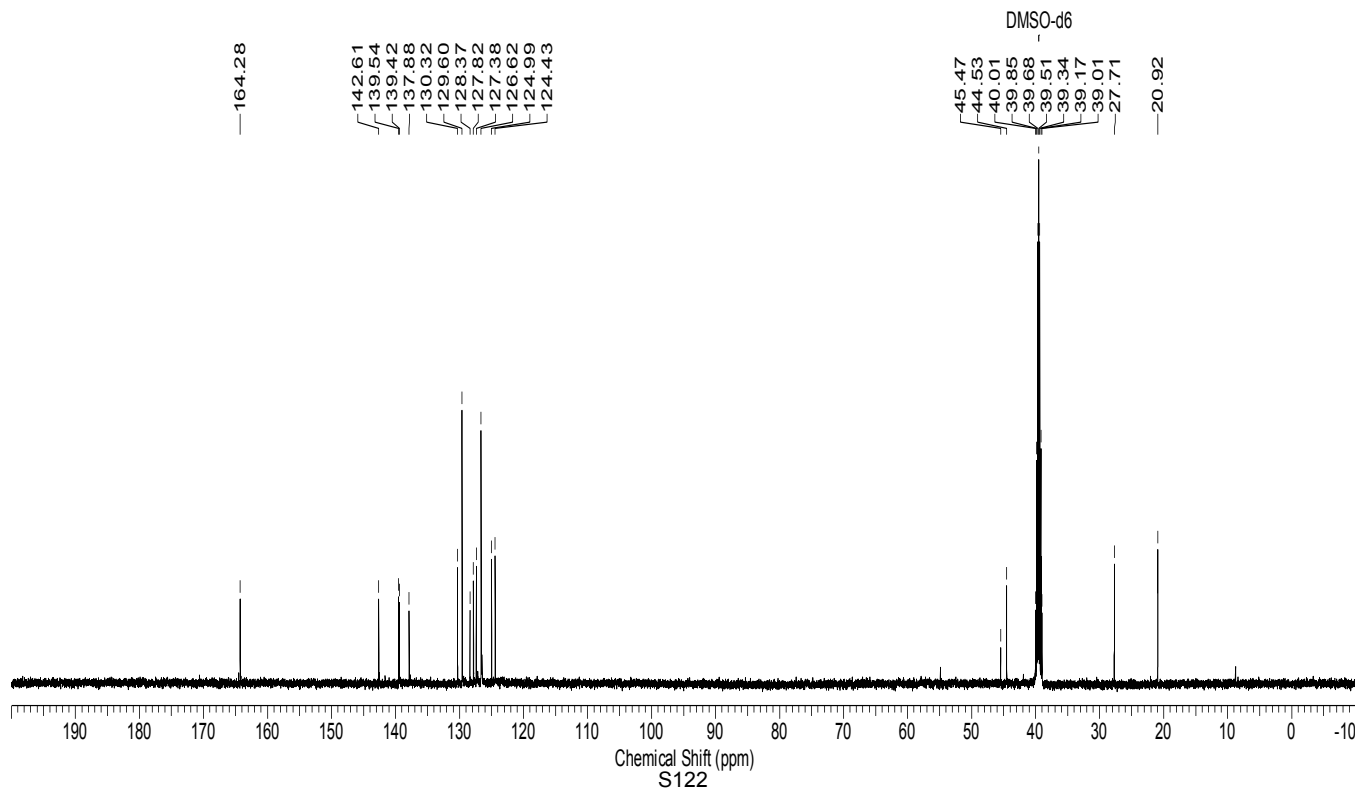

**<sup>1</sup>H NMR**  
**500 MHz**  
**CD<sub>3</sub>OD**

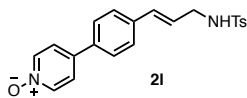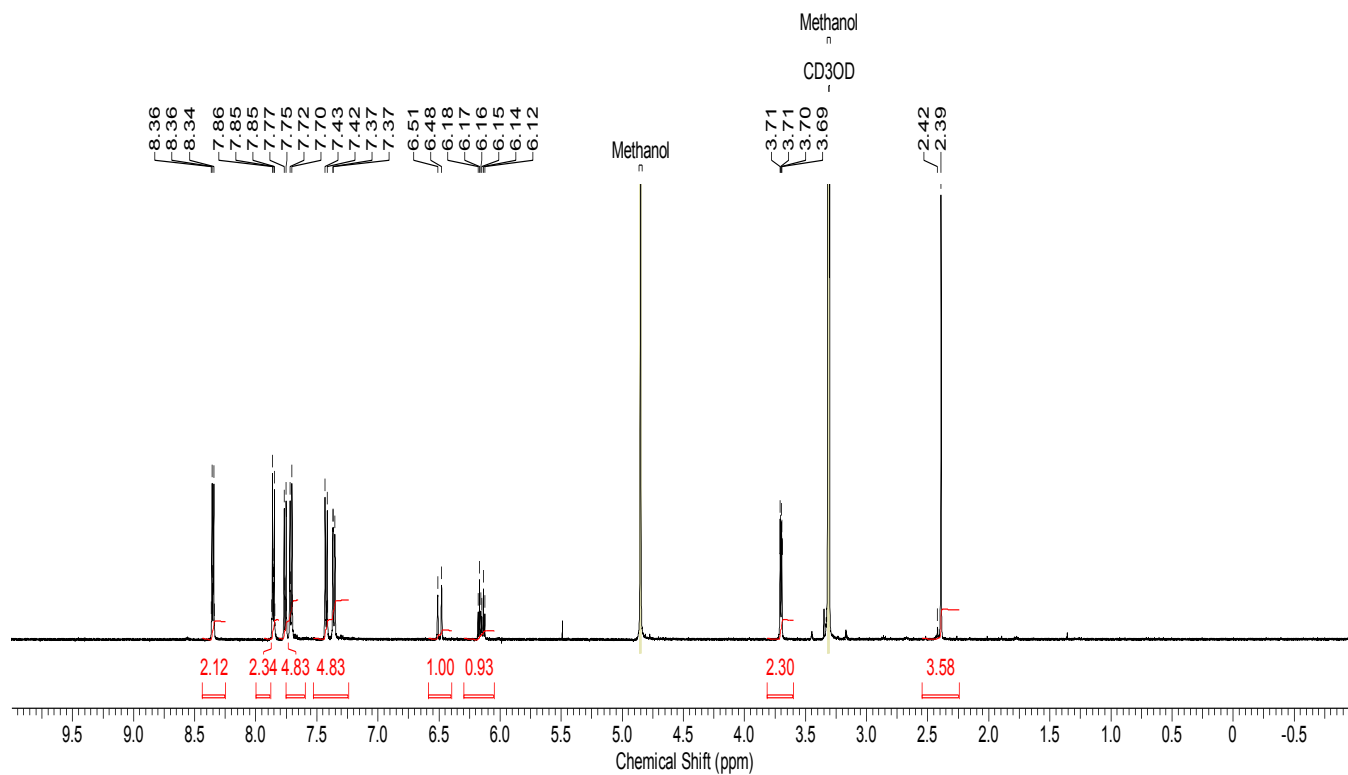

**<sup>13</sup>C NMR**  
**125.7 MHz**  
**5% CH<sub>3</sub>CO<sub>2</sub>D/CDCl<sub>3</sub>**

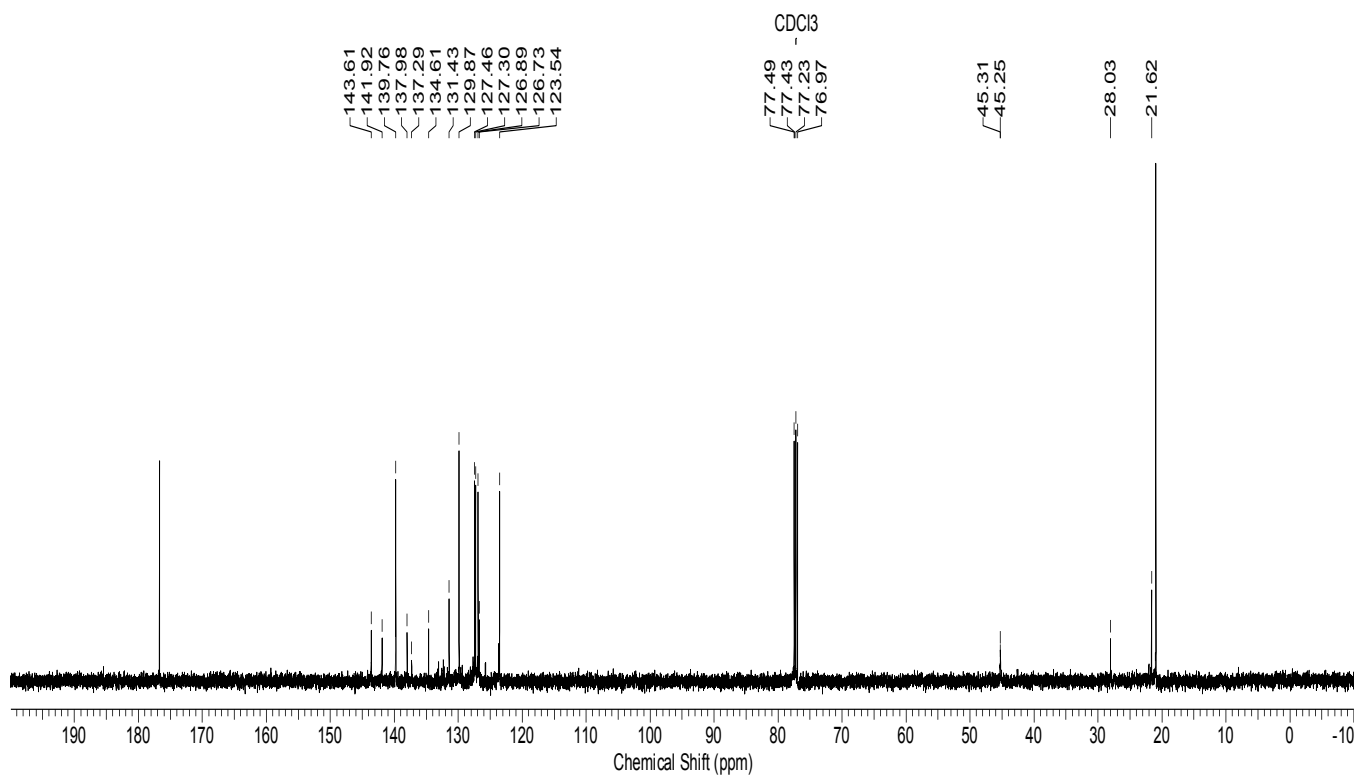

**<sup>1</sup>H NMR**  
**500 MHz**  
**10% CD<sub>3</sub>OD/CDCl<sub>3</sub>**

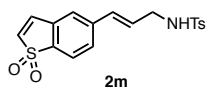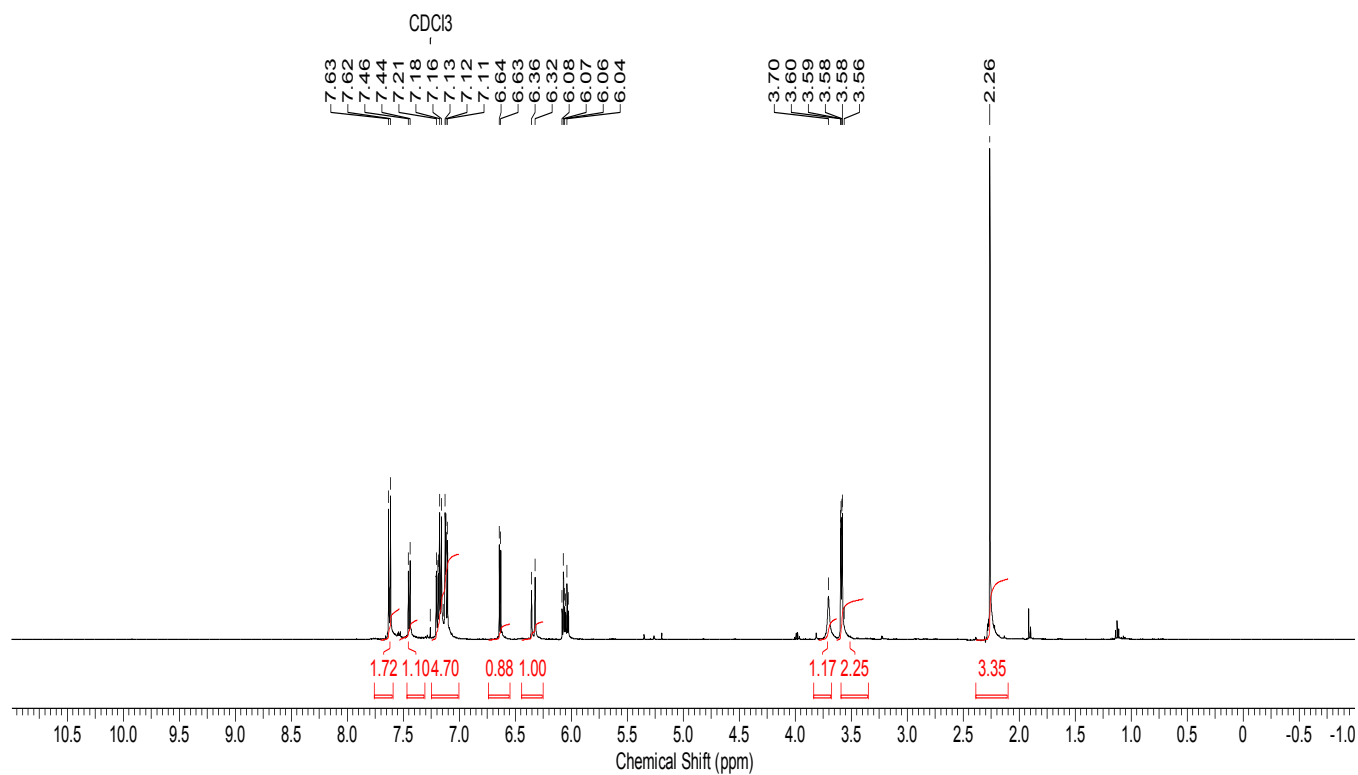

**<sup>13</sup>C NMR**  
**125.7 MHz**  
**10% CD<sub>3</sub>OD/CDCl<sub>3</sub>**

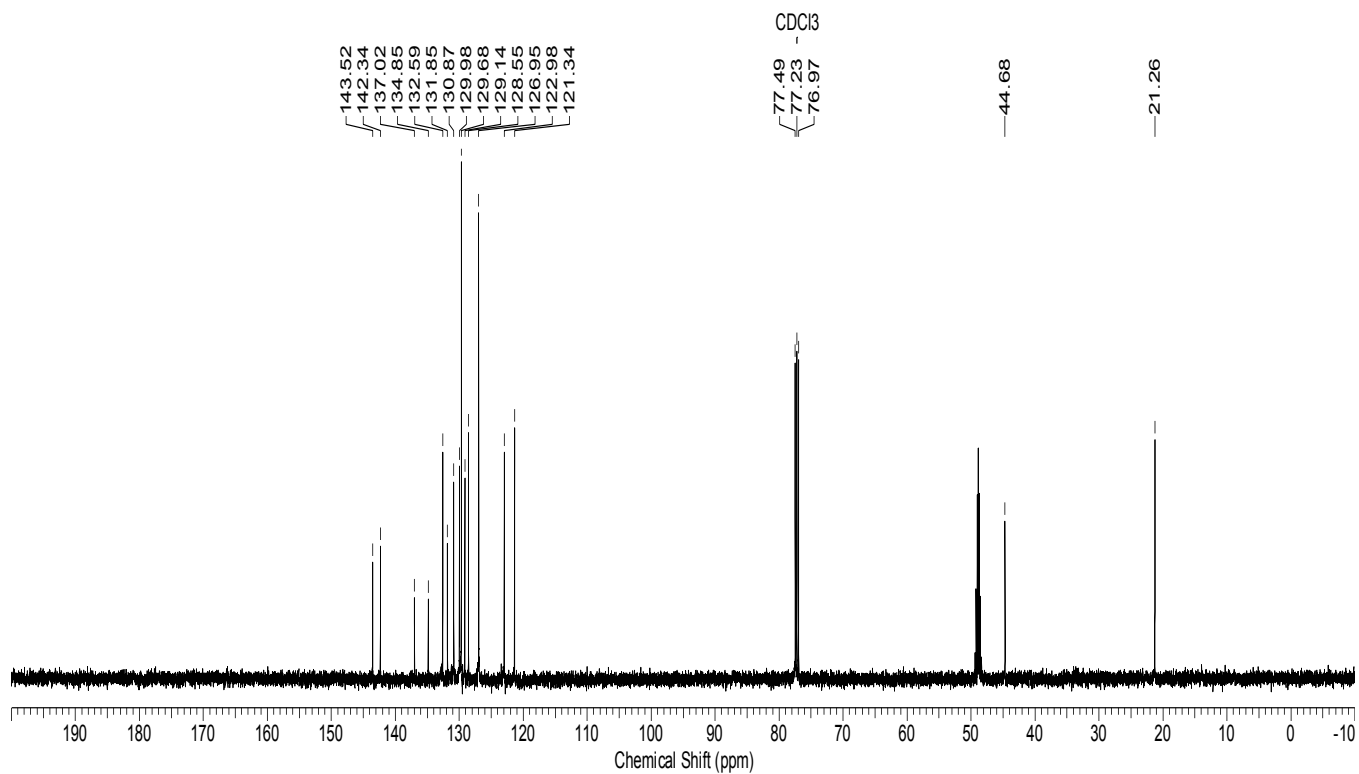

**<sup>1</sup>H NMR**  
**500 MHz**  
**CDCl<sub>3</sub>**

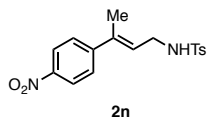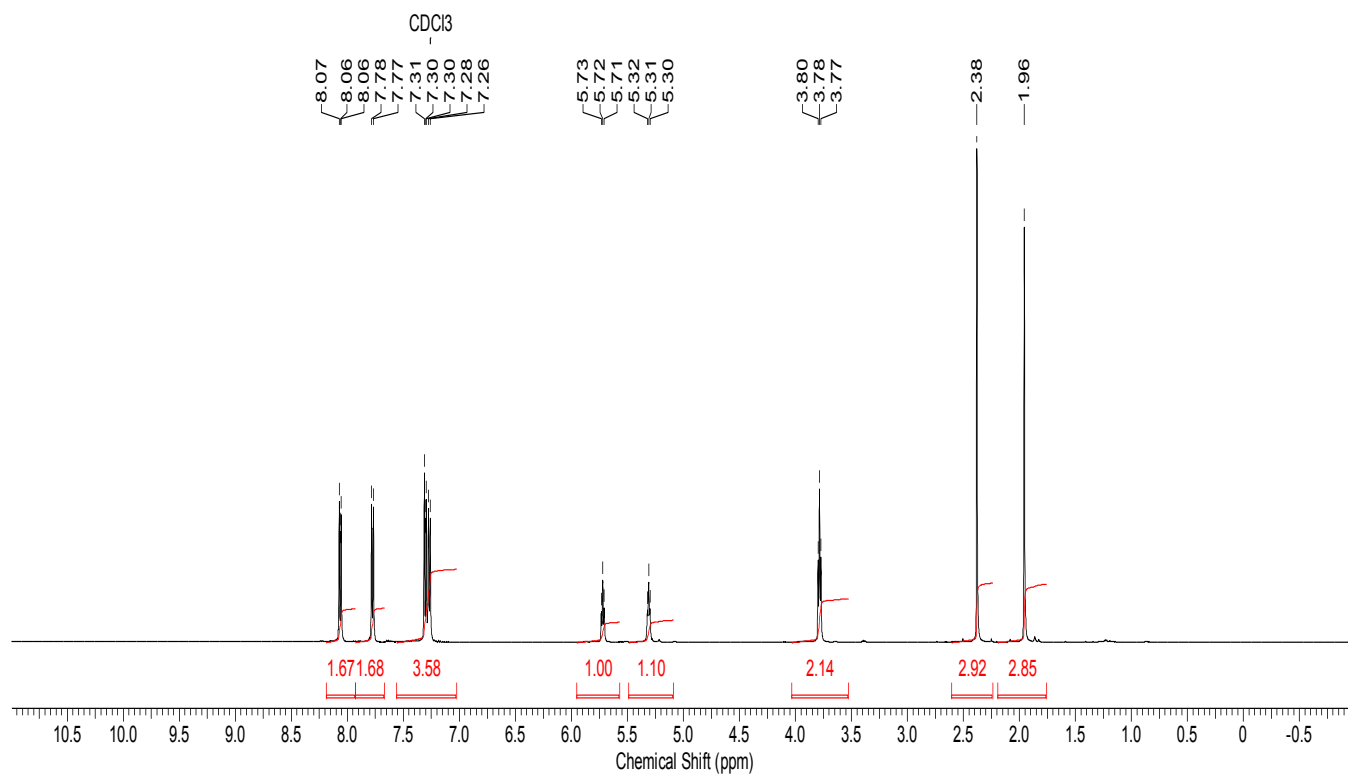

**<sup>13</sup>C NMR**  
**125.7 MHz**  
**CDCl<sub>3</sub>**

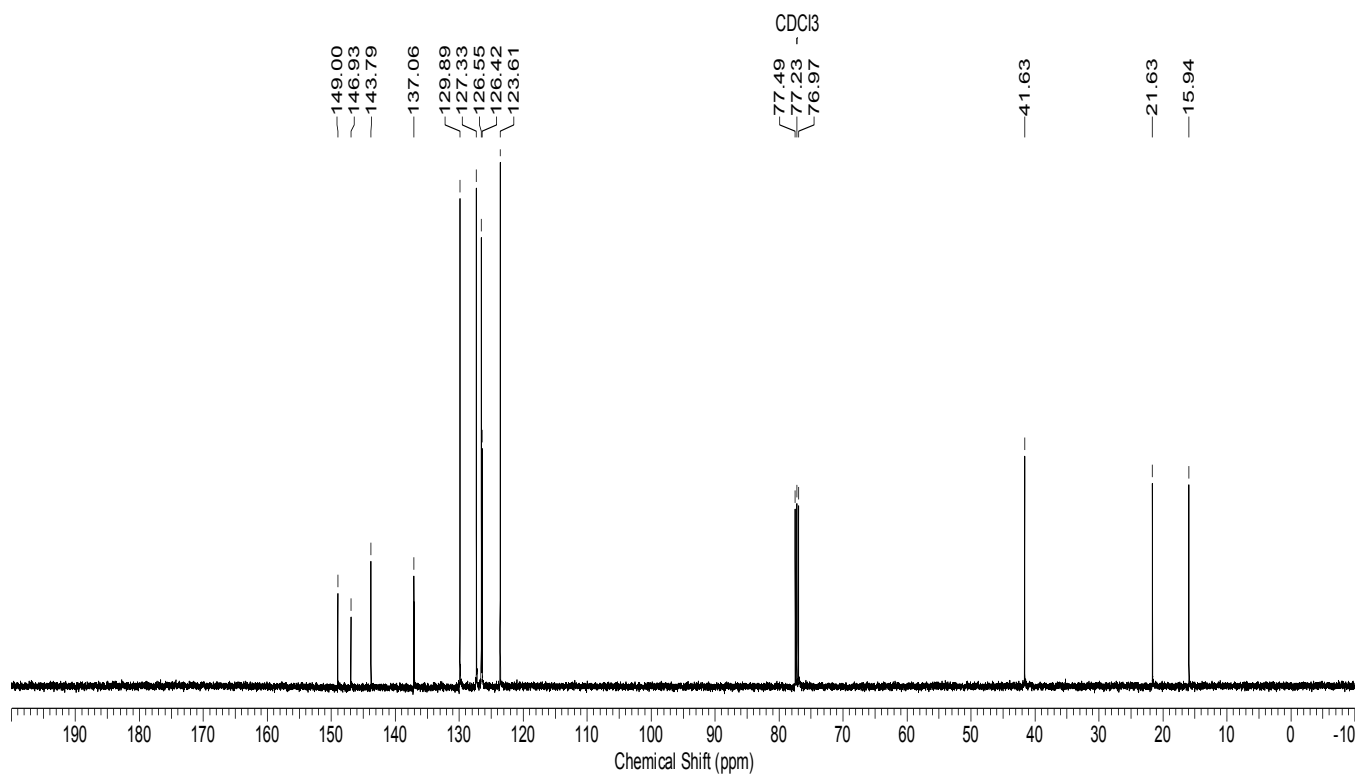

**<sup>1</sup>H NMR**  
**500 MHz**  
**DMSO-*d*<sub>6</sub>**

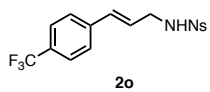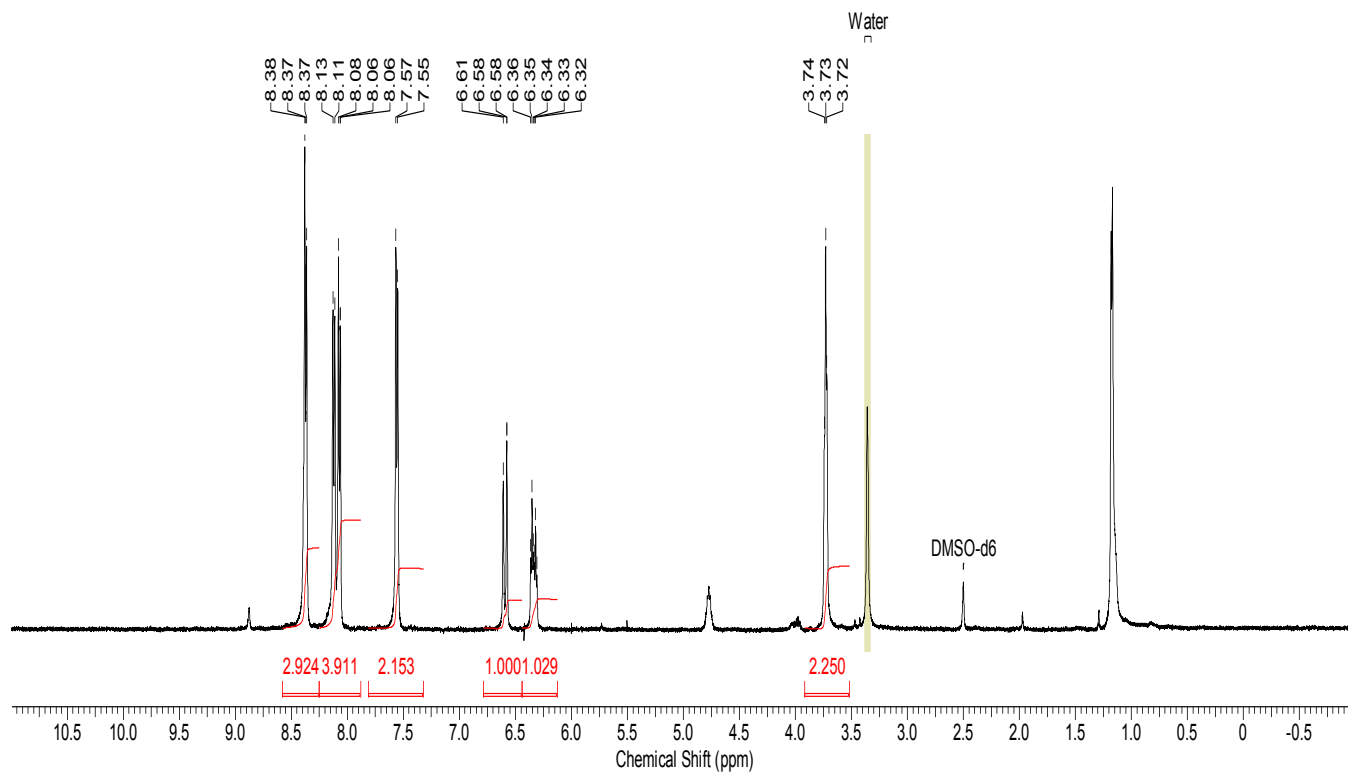

**<sup>13</sup>C NMR**  
**125.7 MHz**  
**DMSO-*d*<sub>6</sub>**

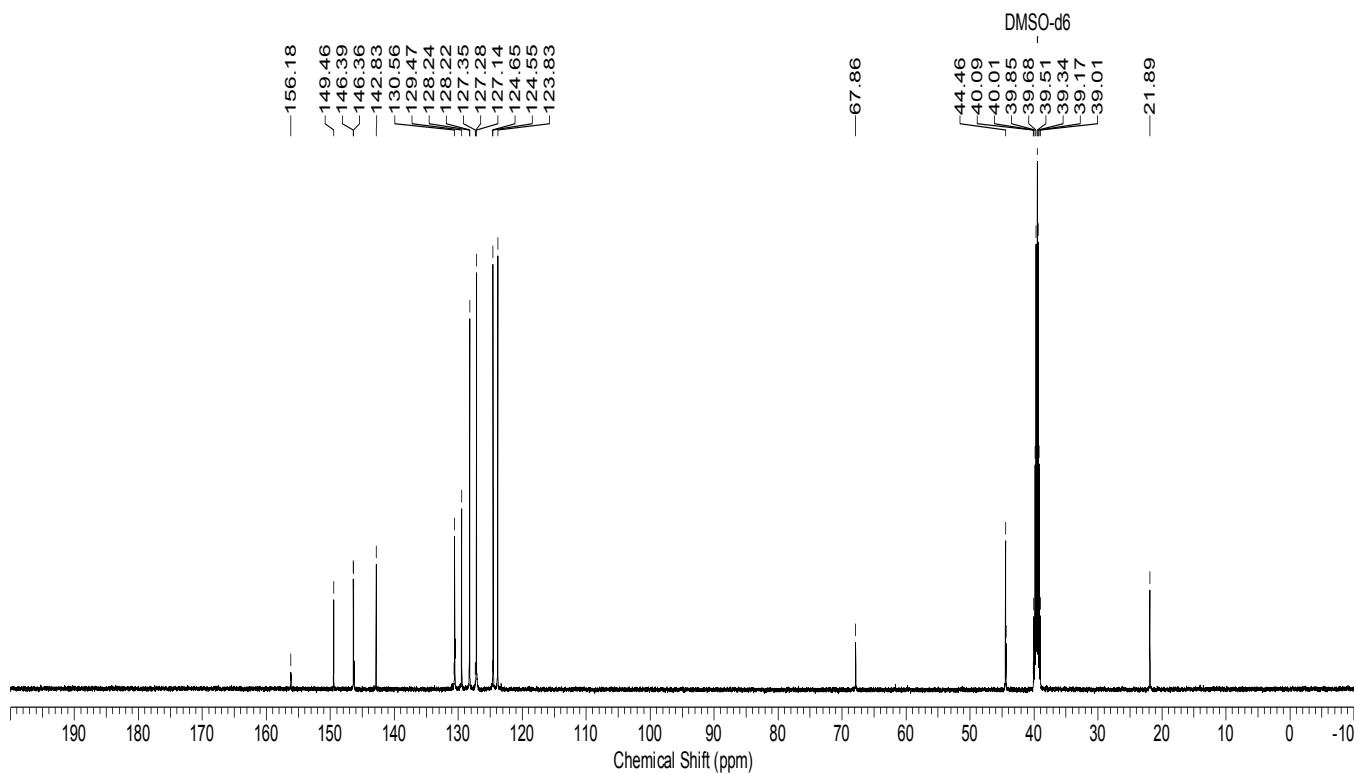

**$^{19}\text{F}$  NMR**  
**470.4 MHz**  
 **$\text{CDCl}_3$**

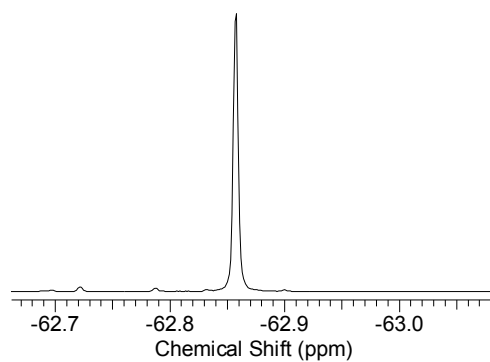

**<sup>1</sup>H NMR**  
**500 MHz**  
**CDCl<sub>3</sub>**

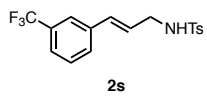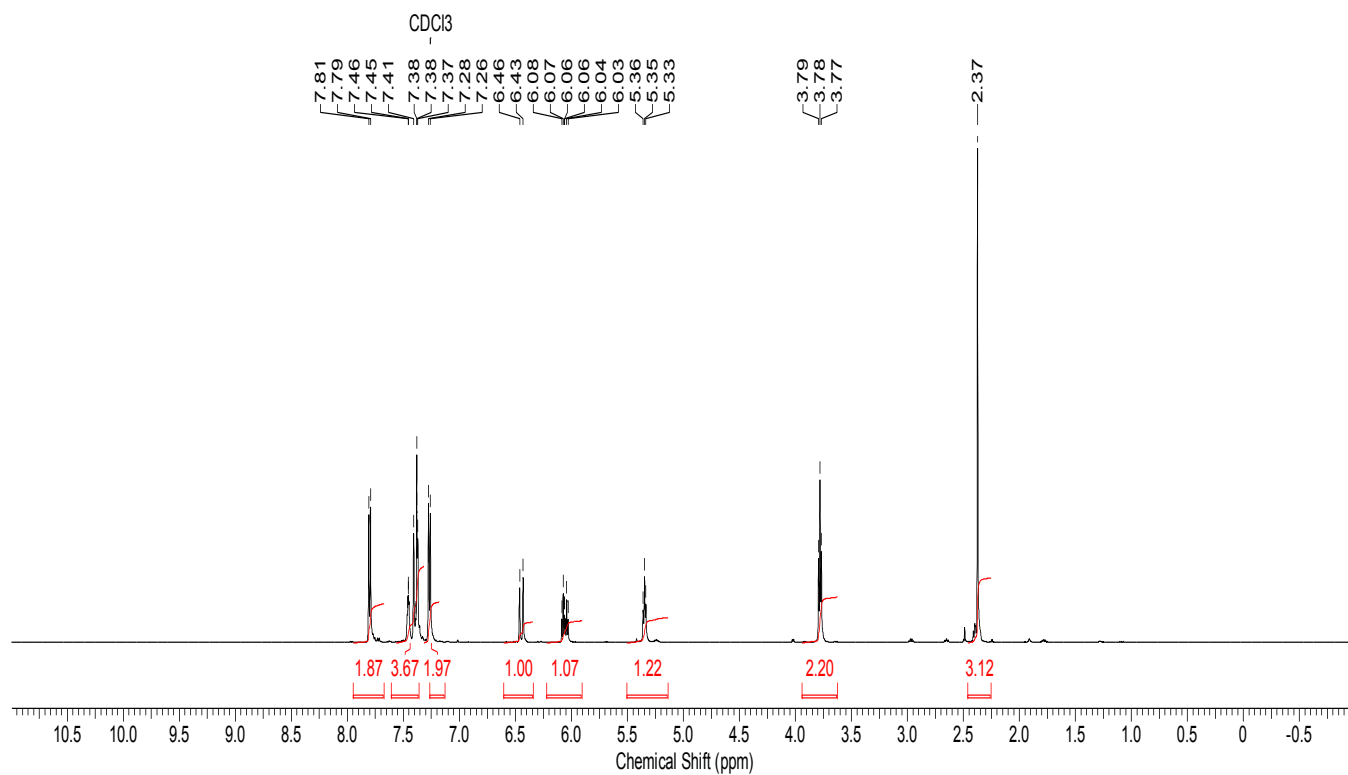

**<sup>13</sup>C NMR**  
**125.7 MHz**  
**CDCl<sub>3</sub>**

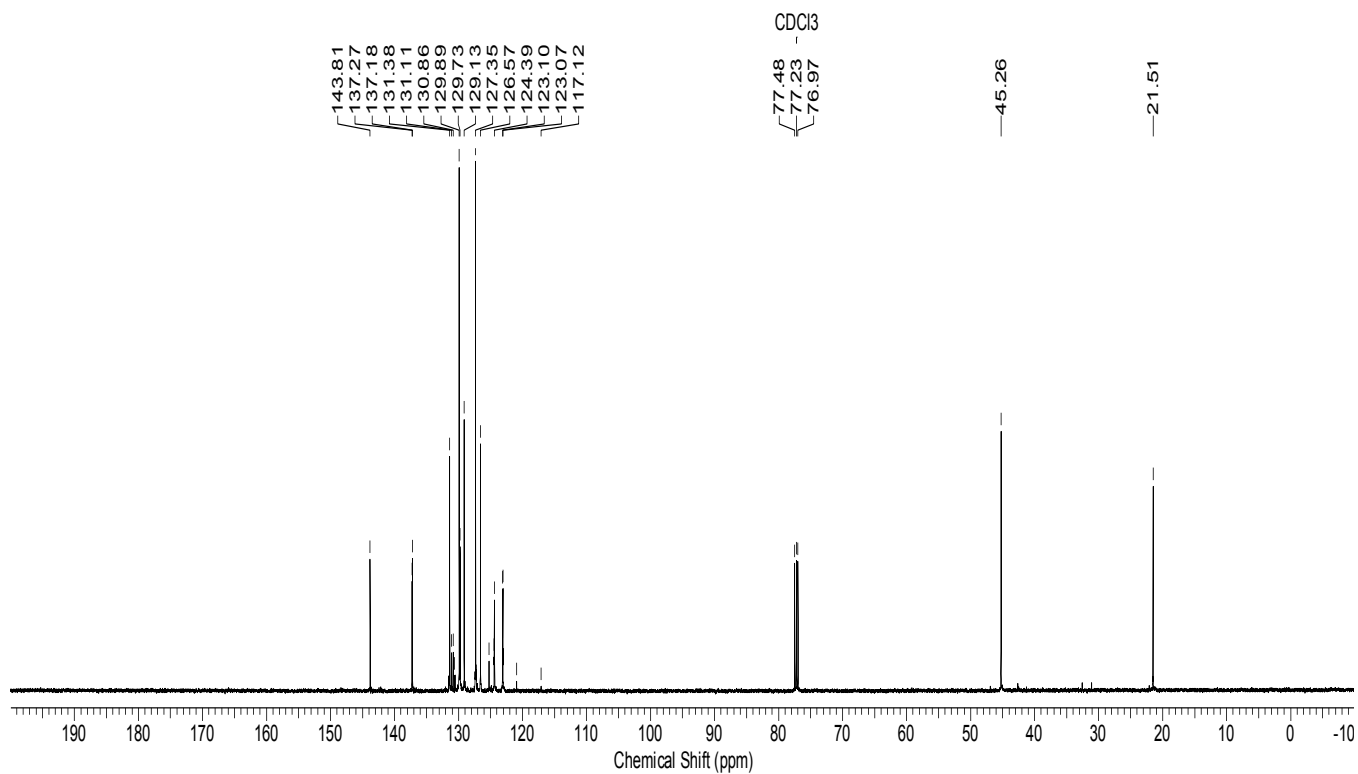



**$^{19}\text{F}$  NMR**  
**470.4 MHz**  
 **$\text{CDCl}_3$**

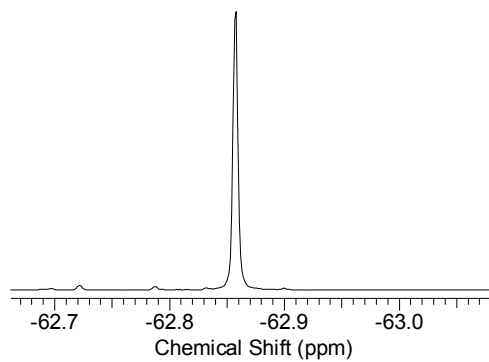

**<sup>1</sup>H NMR**  
**500 MHz**  
**CDCl<sub>3</sub>**

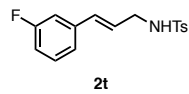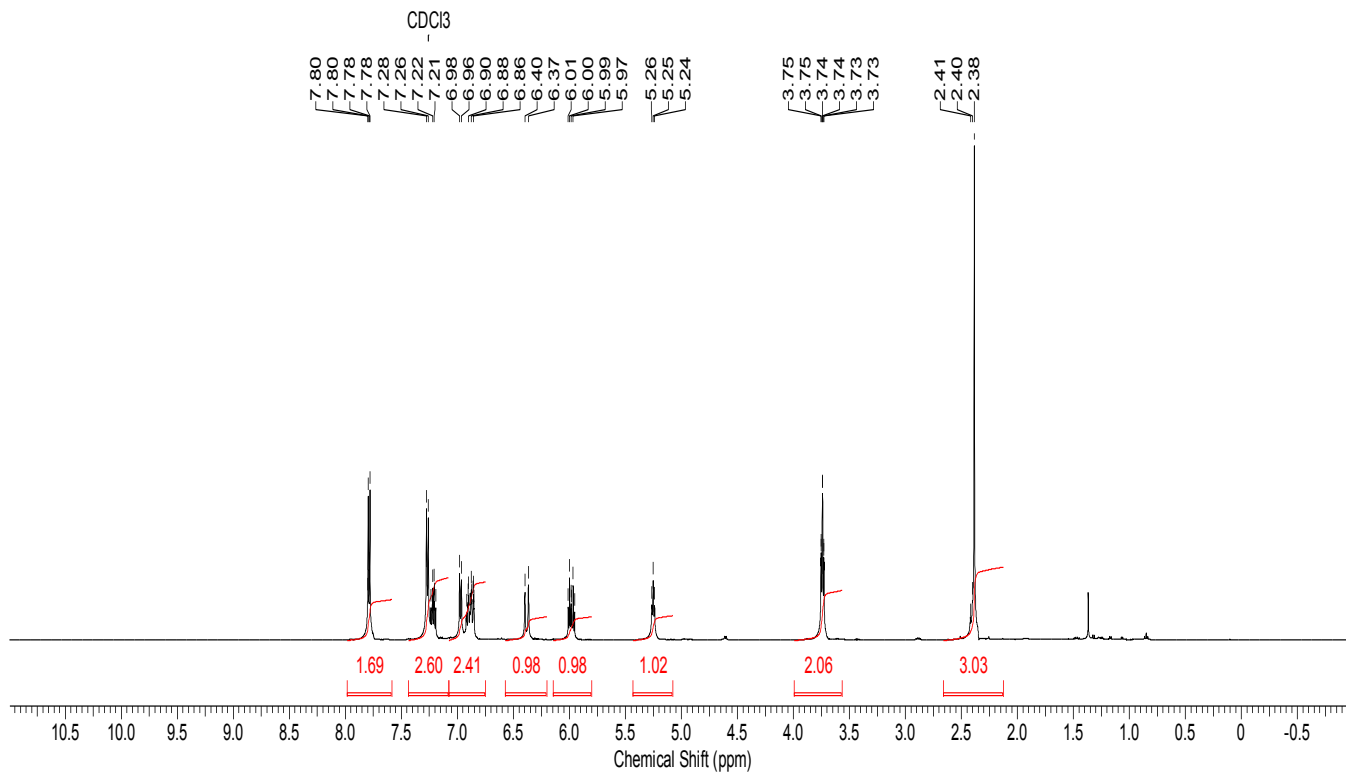

**<sup>13</sup>C NMR**  
**125.7 MHz**  
**CDCl<sub>3</sub>**

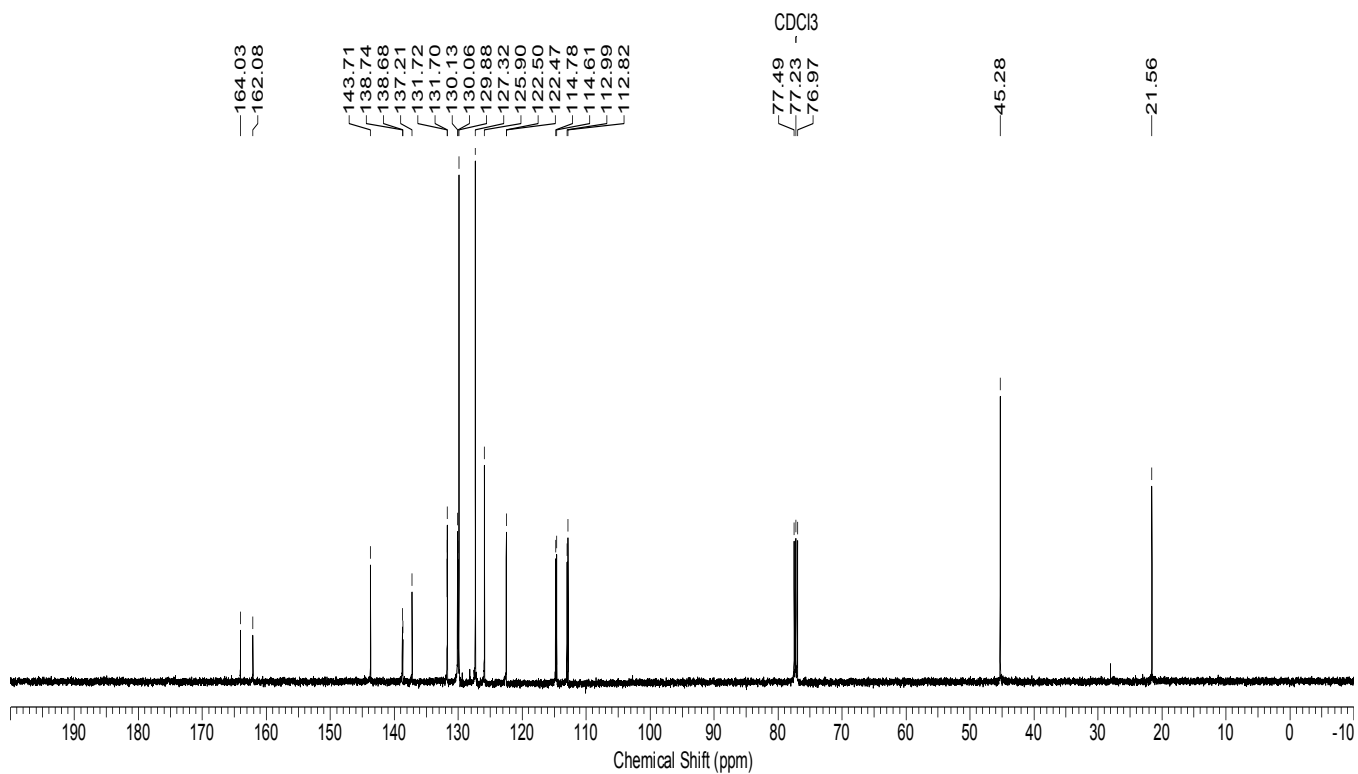

**<sup>19</sup>F NMR**  
**470.4 MHz**  
**CDCl<sub>3</sub>**

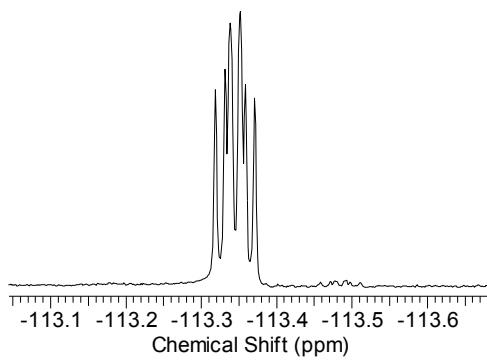

**<sup>1</sup>H NMR**  
**500 MHz**  
**CDCl<sub>3</sub>**

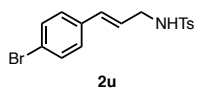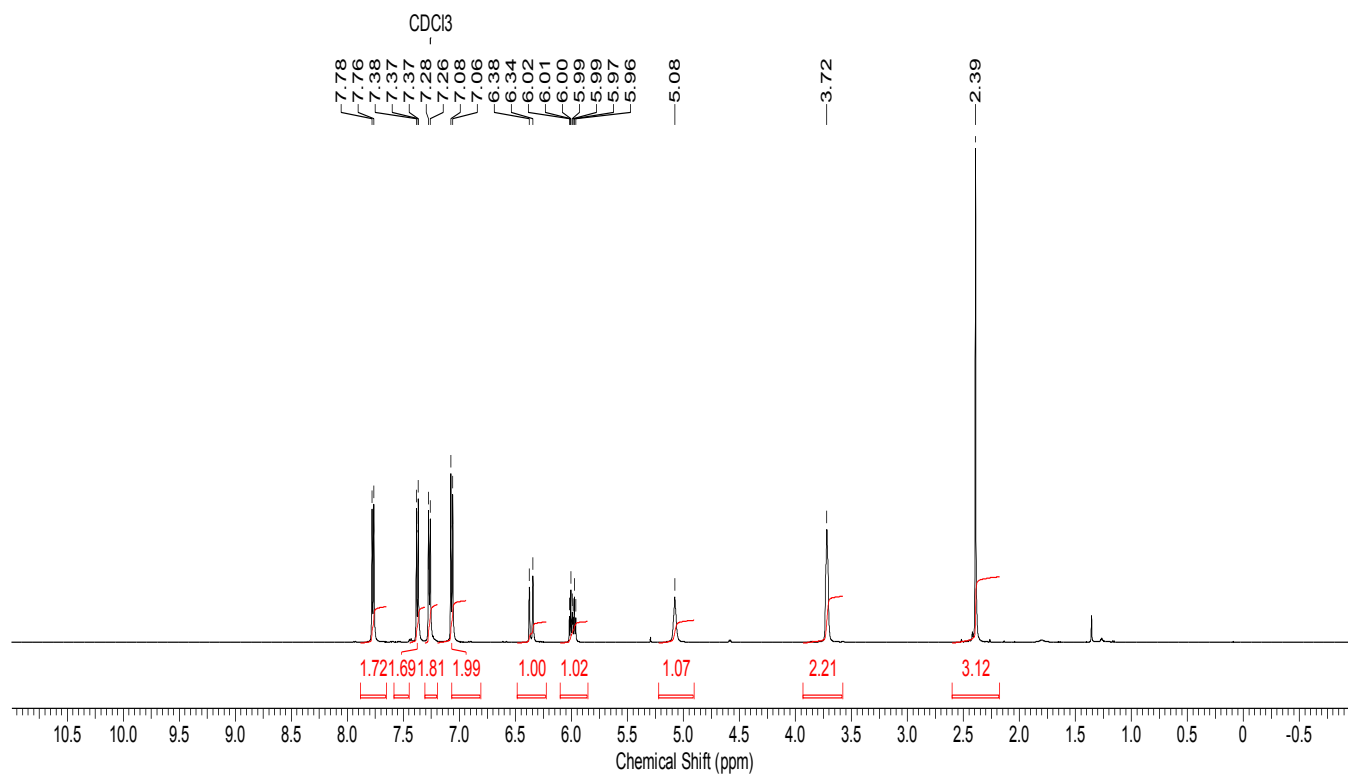

**<sup>13</sup>C NMR**  
**125.7 MHz**  
**CDCl<sub>3</sub>**

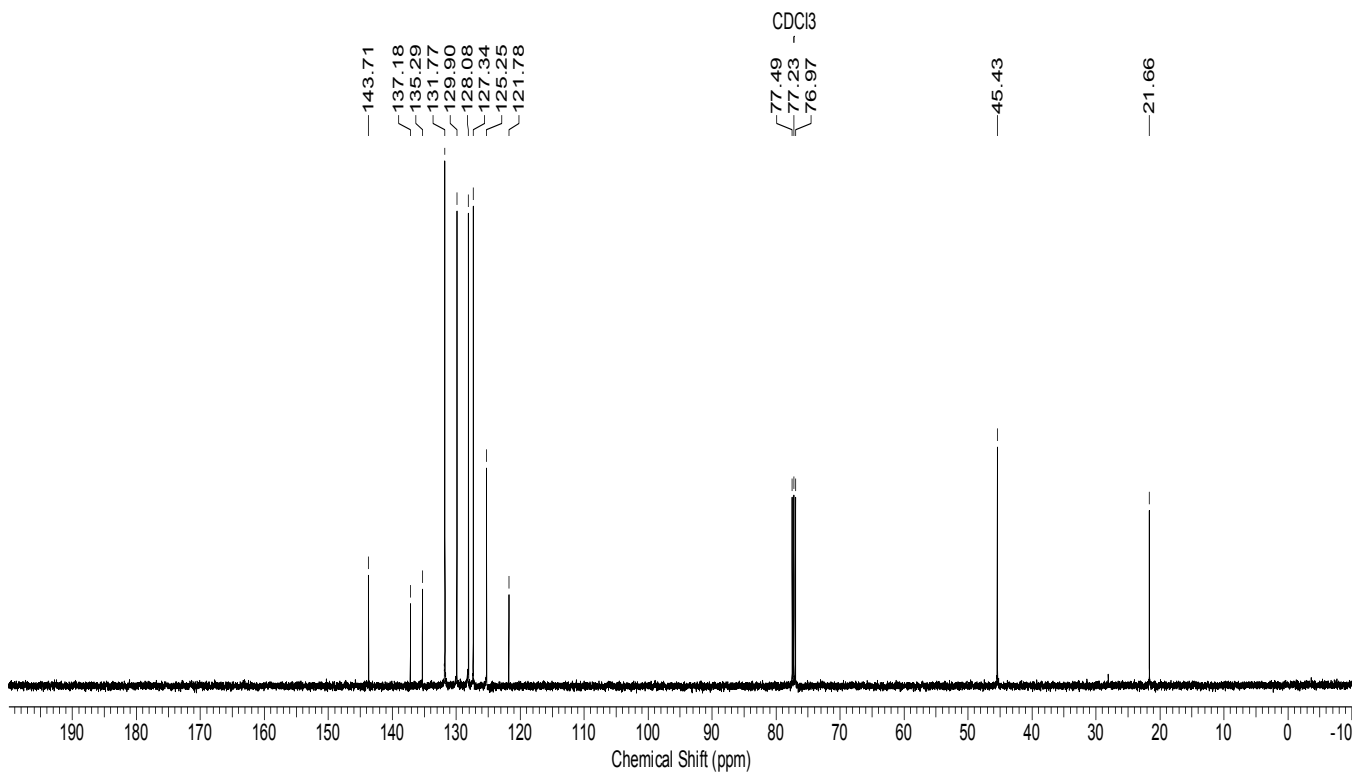

**<sup>1</sup>H NMR**  
**500 MHz**  
**CDCl<sub>3</sub>**

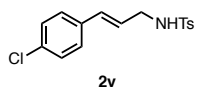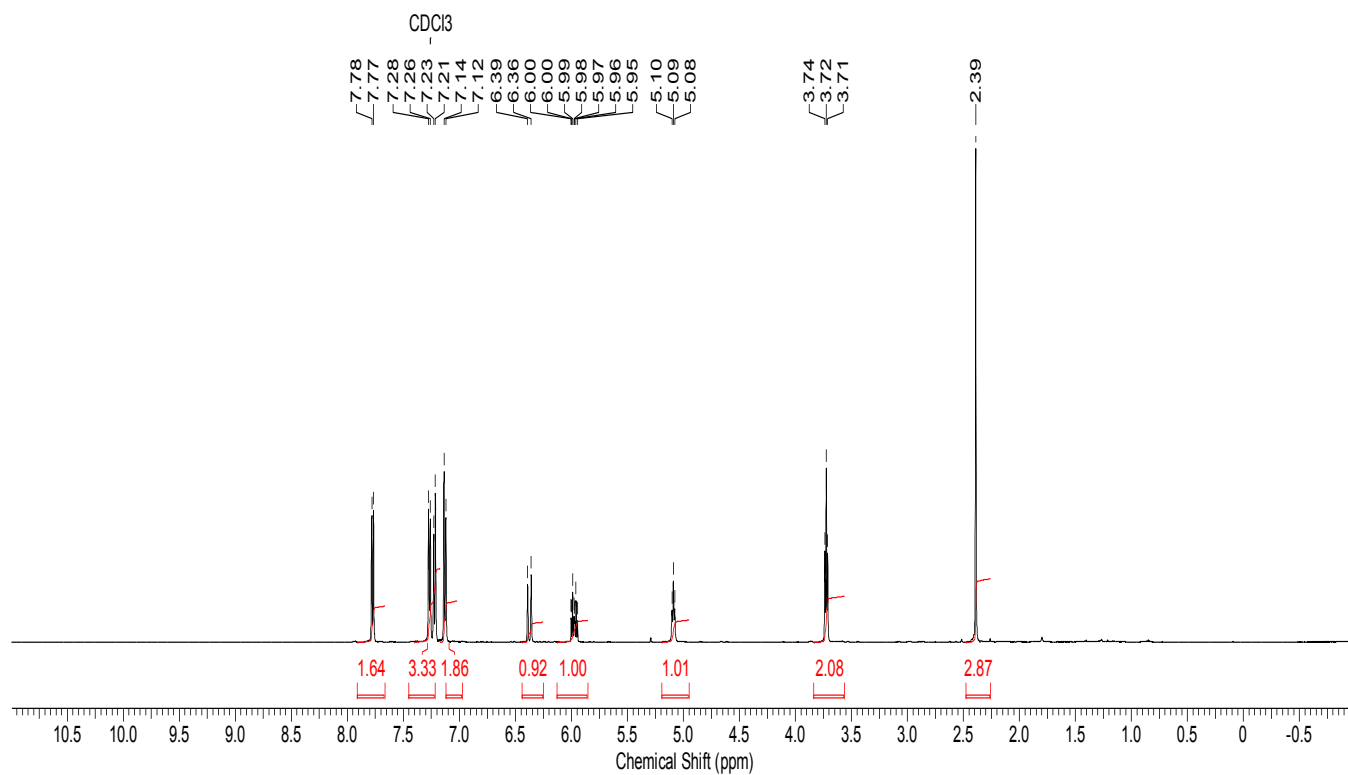

**<sup>13</sup>C NMR**  
**125.7 MHz**  
**CDCl<sub>3</sub>**

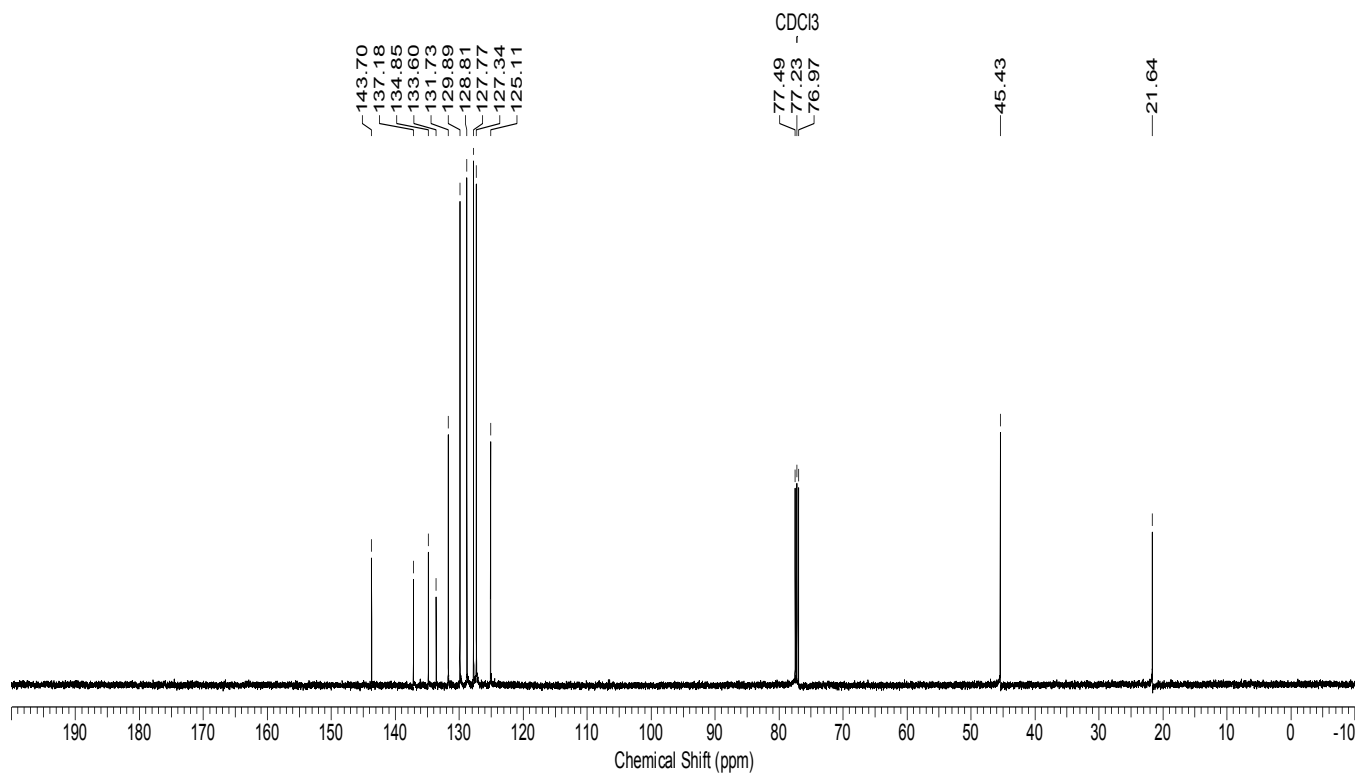

**<sup>1</sup>H NMR**  
**500 MHz**  
**CDCl<sub>3</sub>**

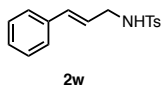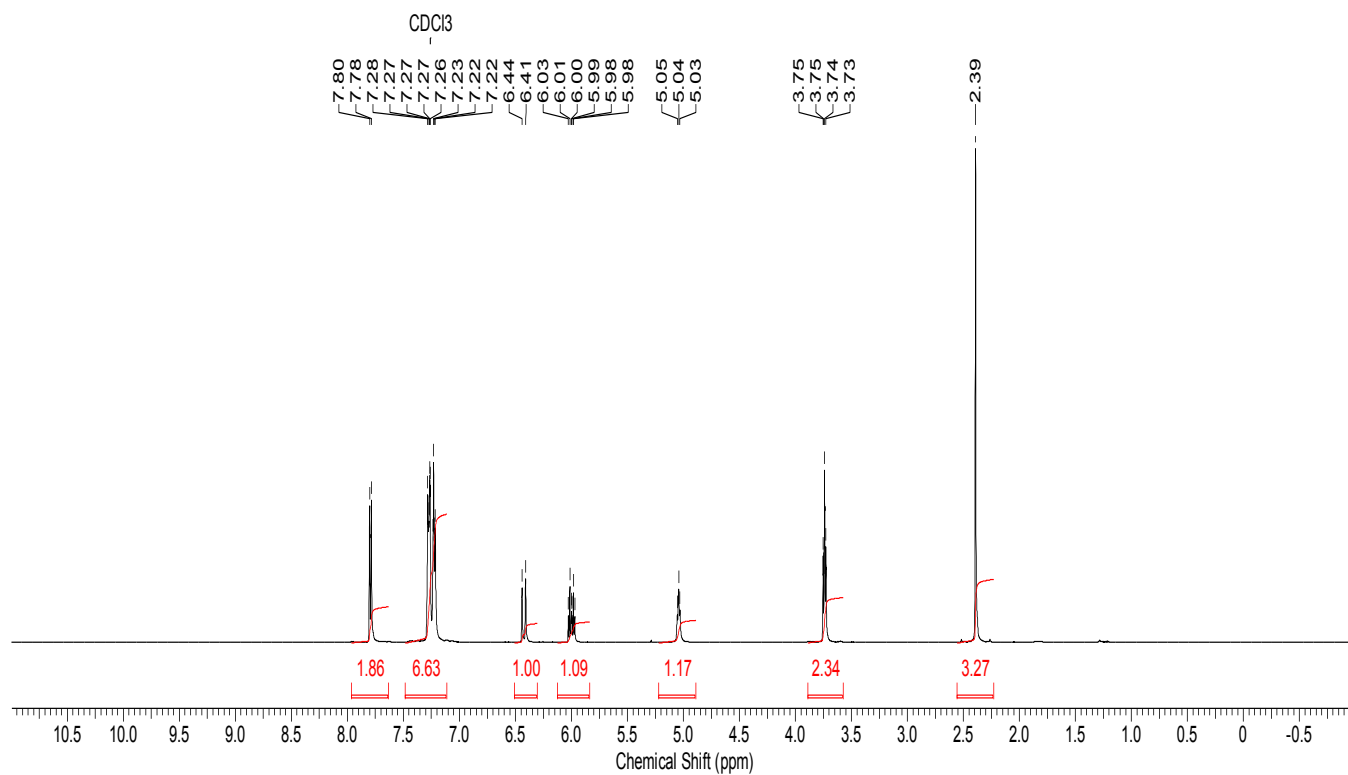

**<sup>13</sup>C NMR**  
**125.7 MHz**  
**CDCl<sub>3</sub>**

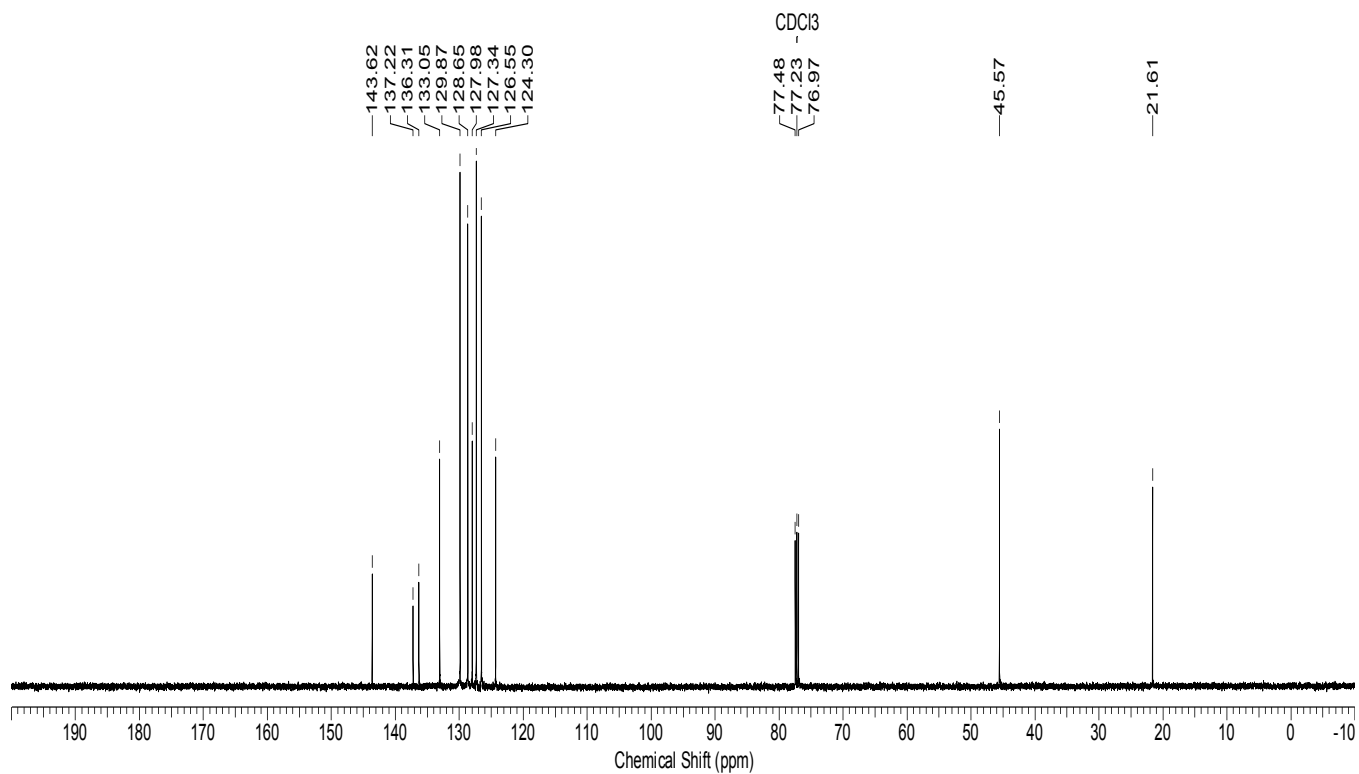

**<sup>1</sup>H NMR**  
**500 MHz**  
**CDCl<sub>3</sub>**

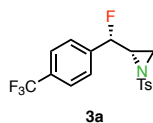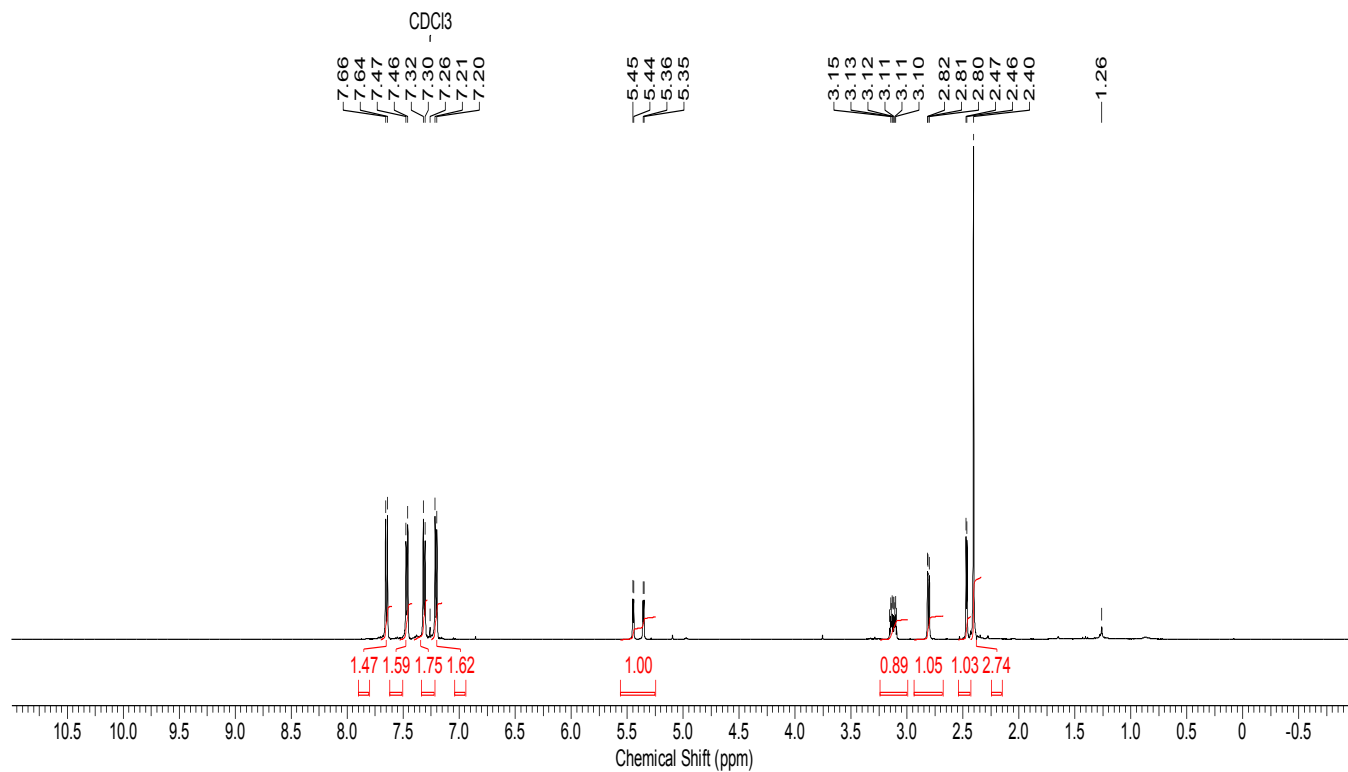

**<sup>13</sup>C NMR**  
**125.7 MHz**  
**CDCl<sub>3</sub>**

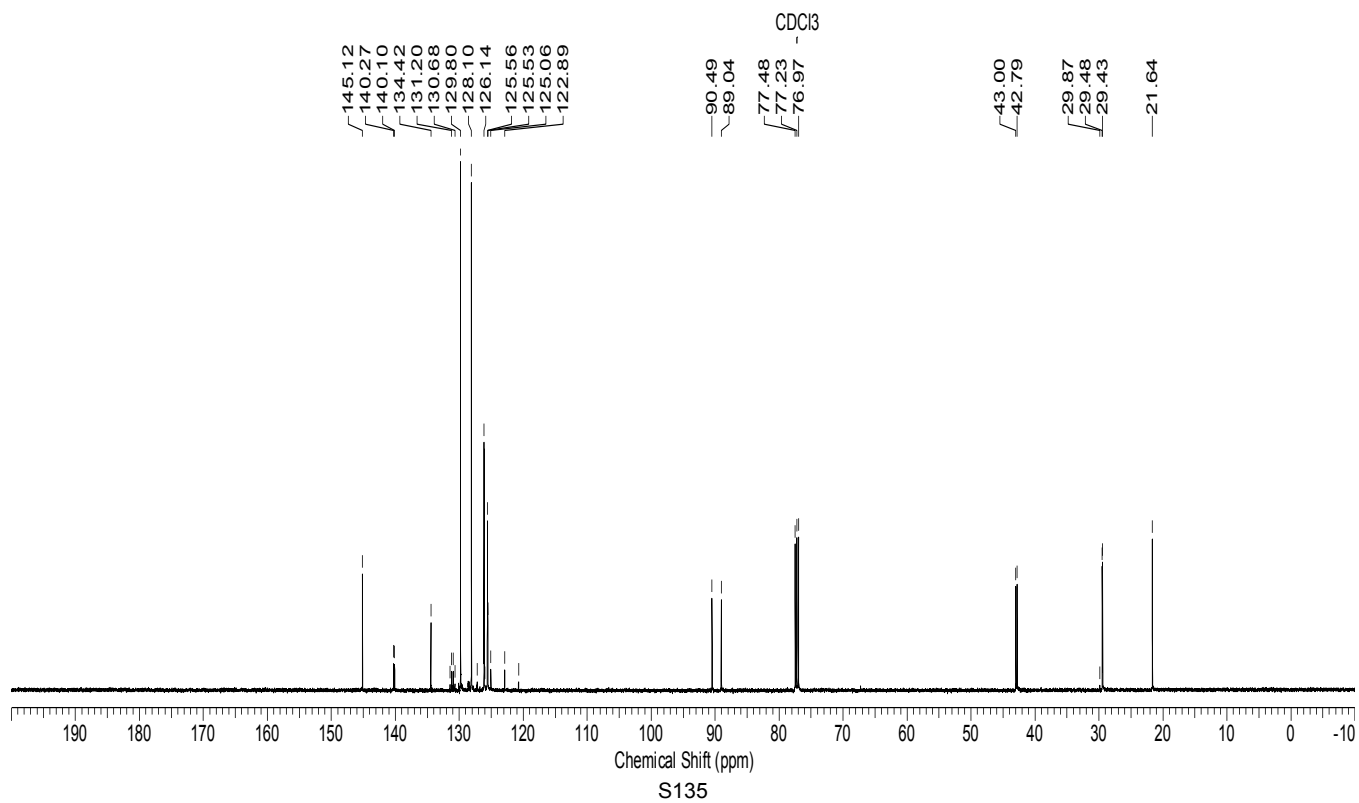

**$^{19}\text{F}$  NMR**  
**470.4 MHz**  
 **$\text{CDCl}_3$**

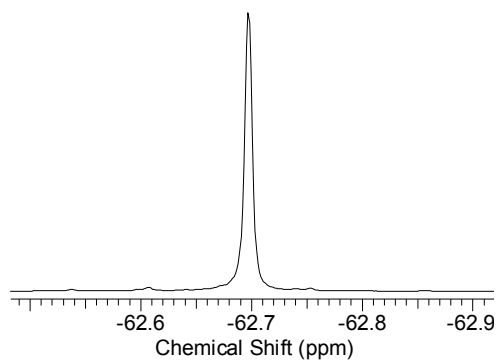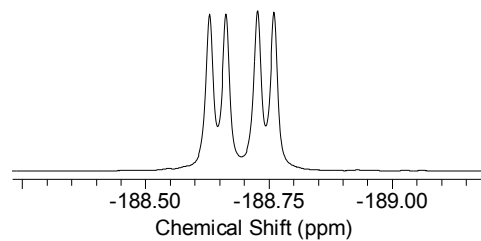



**<sup>1</sup>H NMR**  
**500 MHz**  
**CDCl<sub>3</sub>**

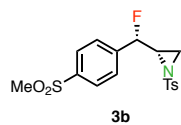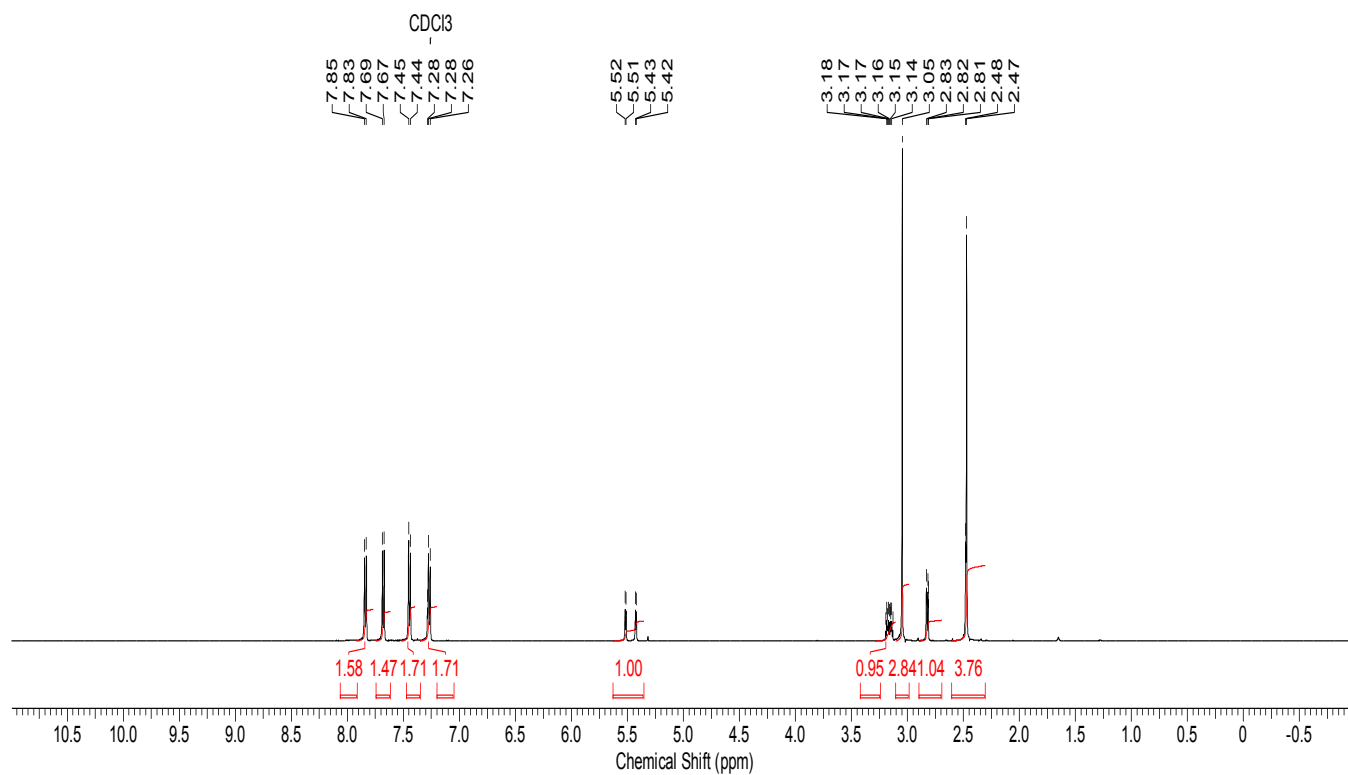

**<sup>13</sup>C NMR**  
**125.7 MHz**  
**CDCl<sub>3</sub>**

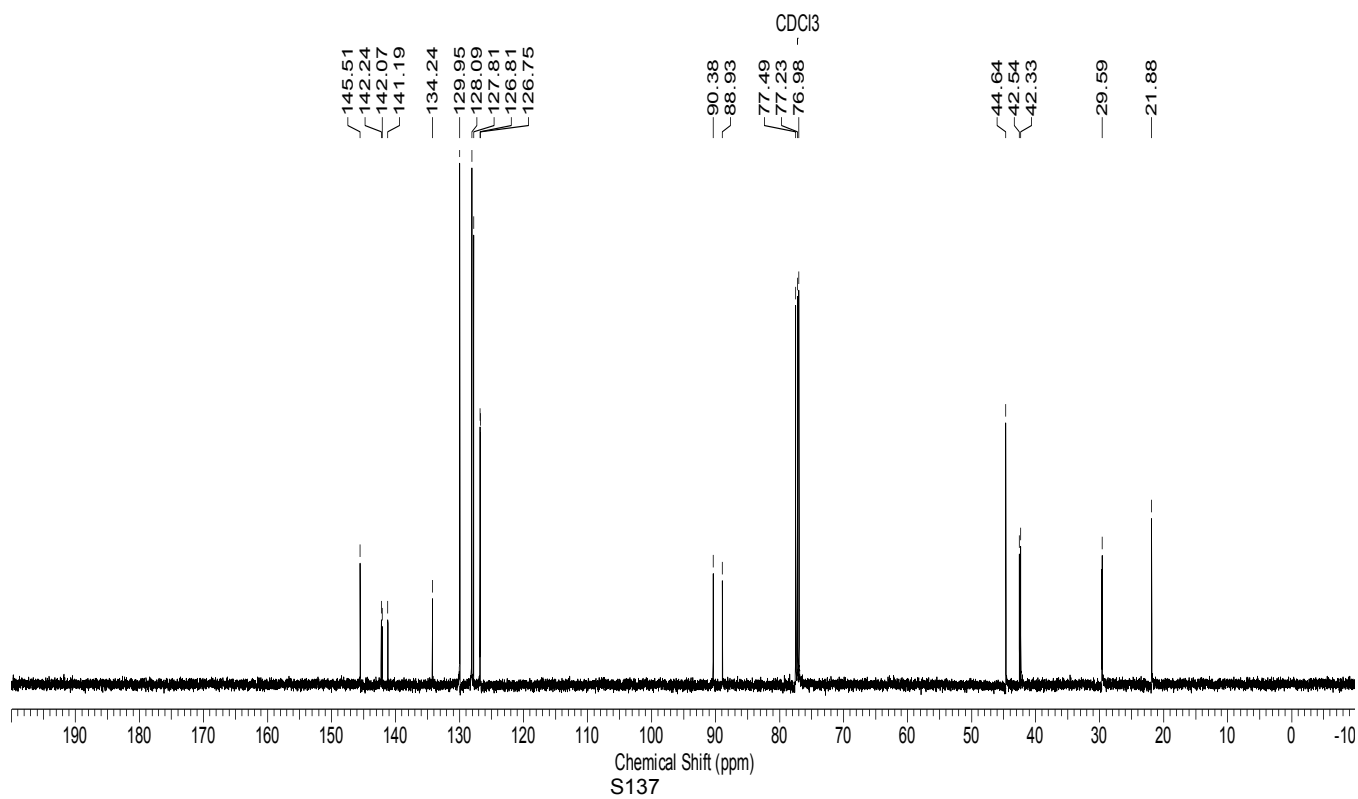

**$^{19}\text{F}$  NMR**  
**470.4 MHz**  
 **$\text{CDCl}_3$**

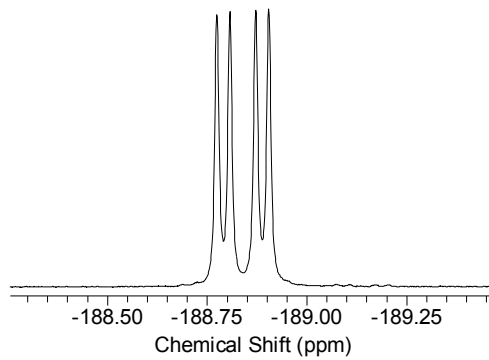

**<sup>1</sup>H NMR**  
**500 MHz**  
**CDCl<sub>3</sub>**

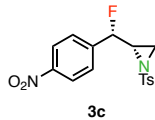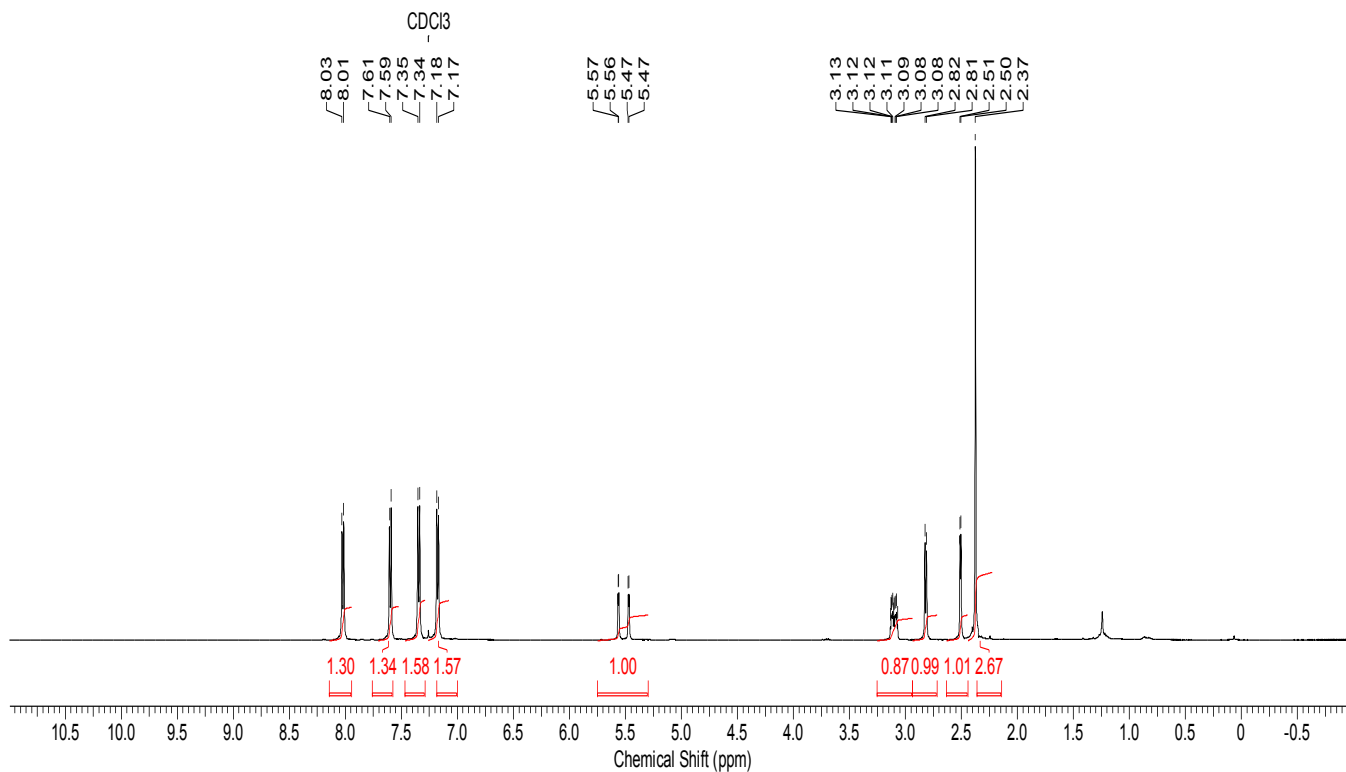

**<sup>13</sup>C NMR**  
**125.7 MHz**  
**CDCl<sub>3</sub>**

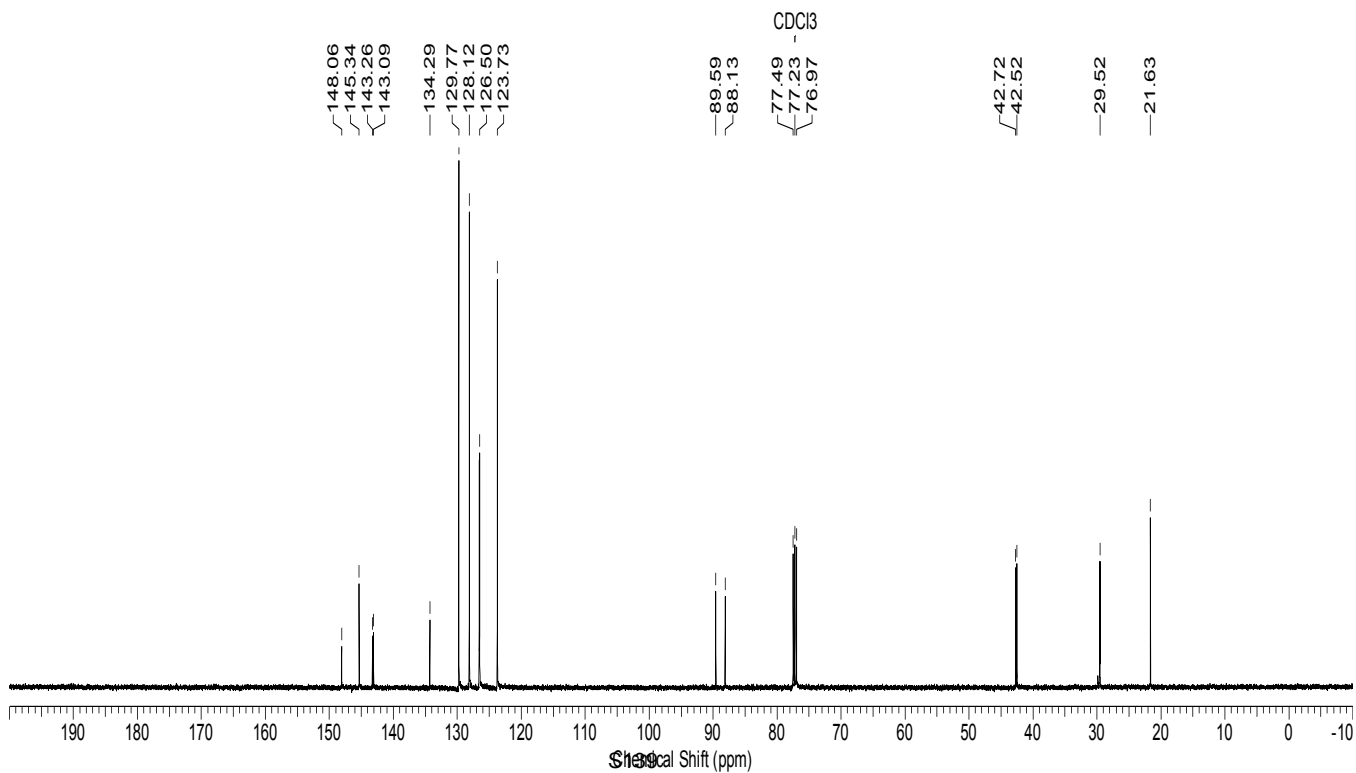

**$^{19}\text{F}$  NMR**  
**470.4 MHz**  
 **$\text{CDCl}_3$**

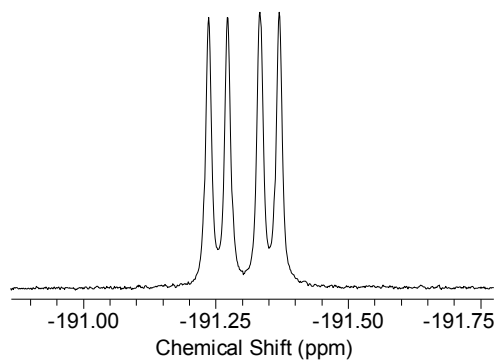

**<sup>1</sup>H NMR**  
**500 MHz**  
**CDCl<sub>3</sub>**

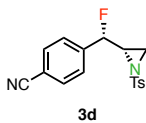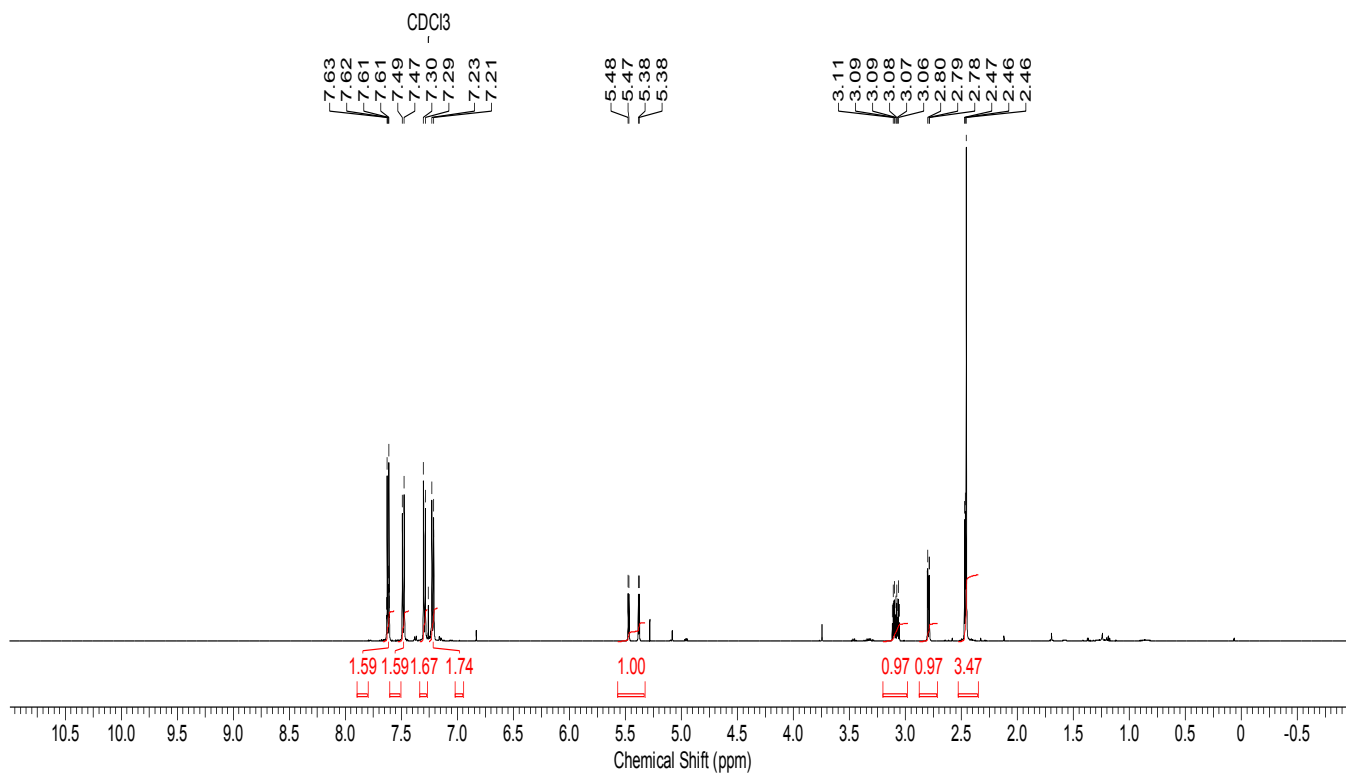

**<sup>13</sup>C NMR**  
**125.7 MHz**  
**CDCl<sub>3</sub>**

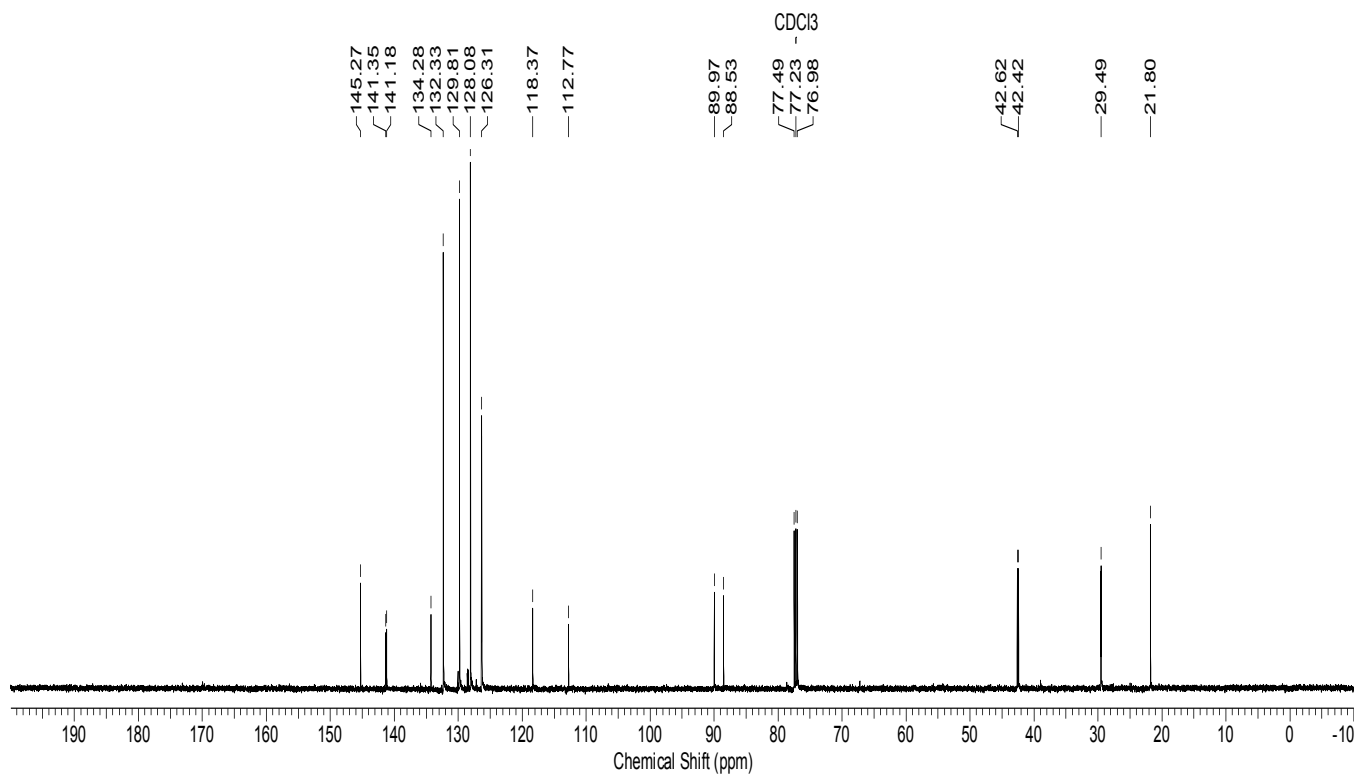

**$^{19}\text{F}$  NMR**  
**470.4 MHz**  
 **$\text{CDCl}_3$**

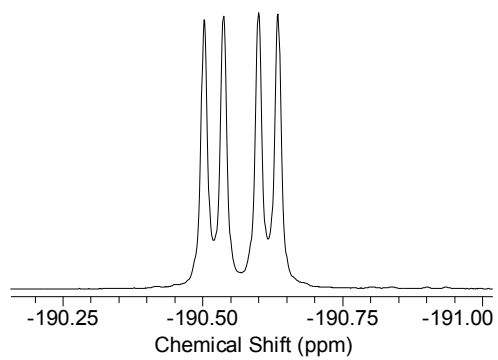

**<sup>1</sup>H NMR**  
**500 MHz**  
**CDCl<sub>3</sub>**

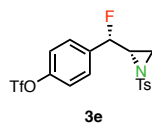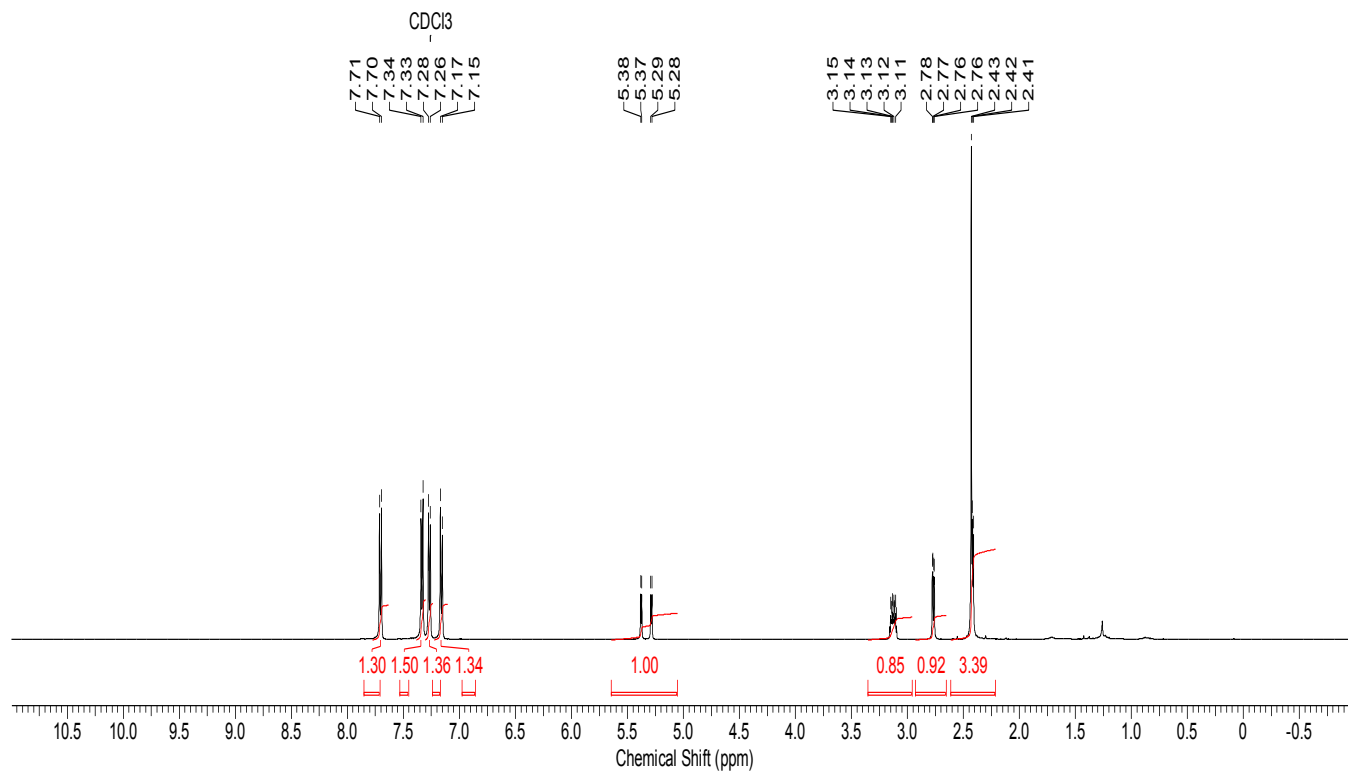

**<sup>13</sup>C NMR**  
**125.7 MHz**  
**CDCl<sub>3</sub>**

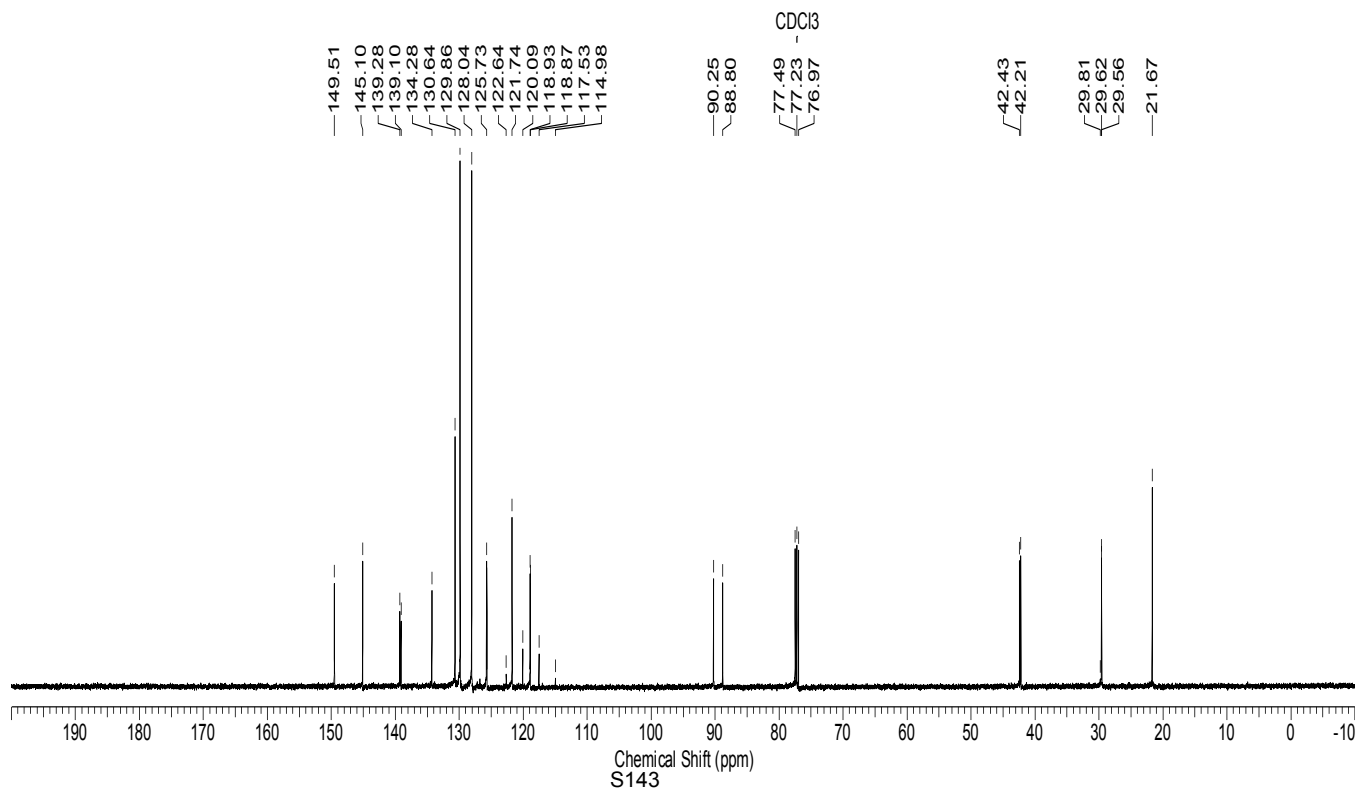

**$^{19}\text{F}$  NMR**  
**470.4 MHz**  
 **$\text{CDCl}_3$**

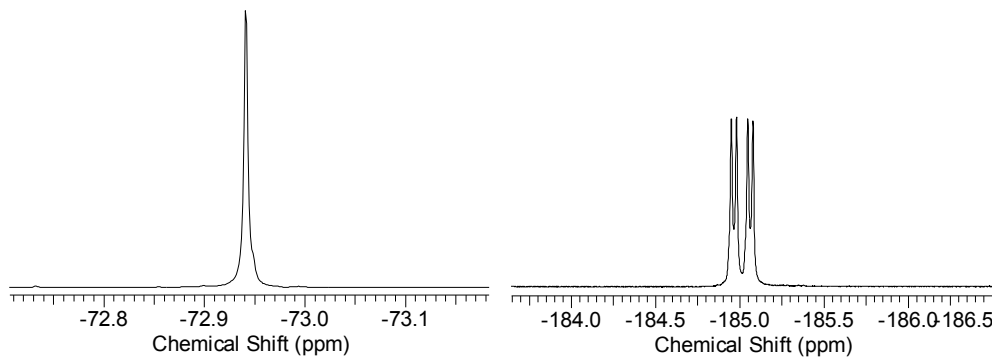



**<sup>1</sup>H NMR**  
**500 MHz**  
**CDCl<sub>3</sub>**

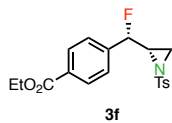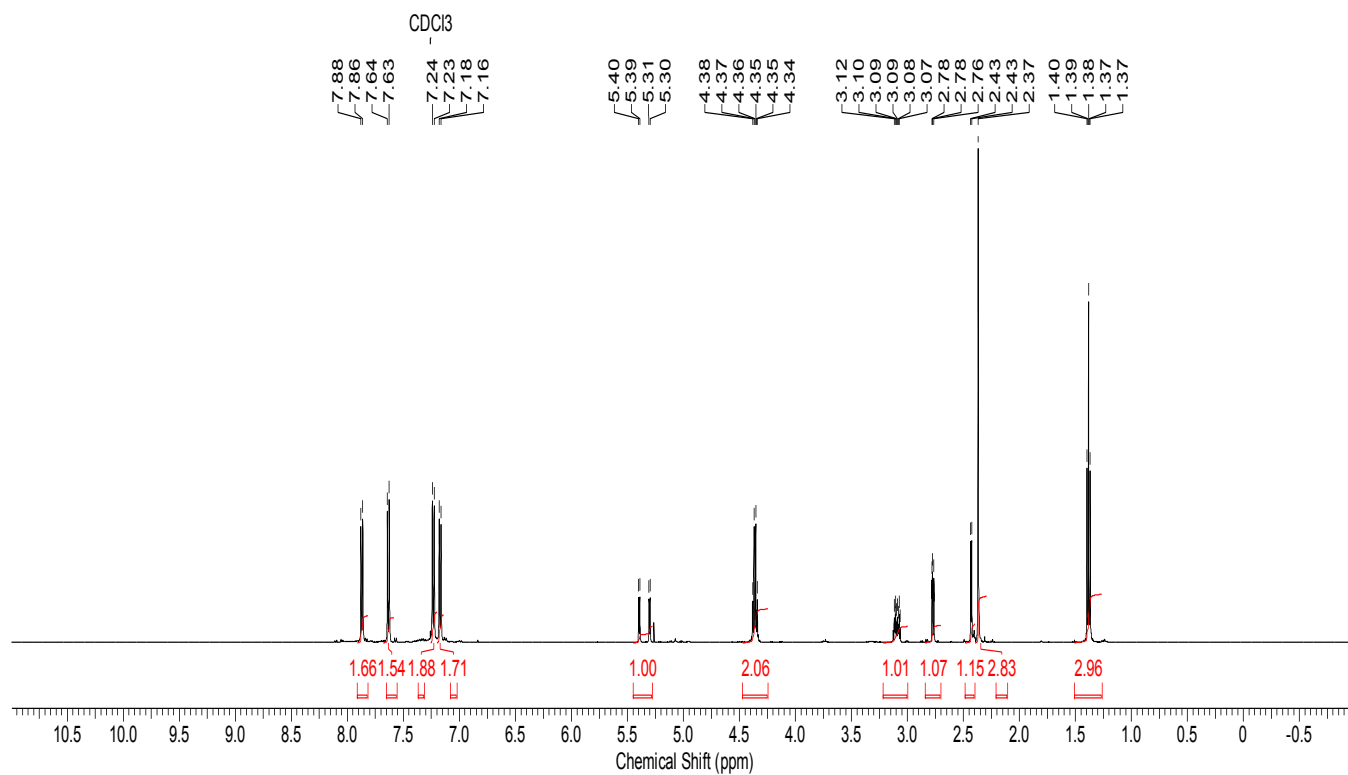

**<sup>13</sup>C NMR**  
**125.7 MHz**  
**CDCl<sub>3</sub>**

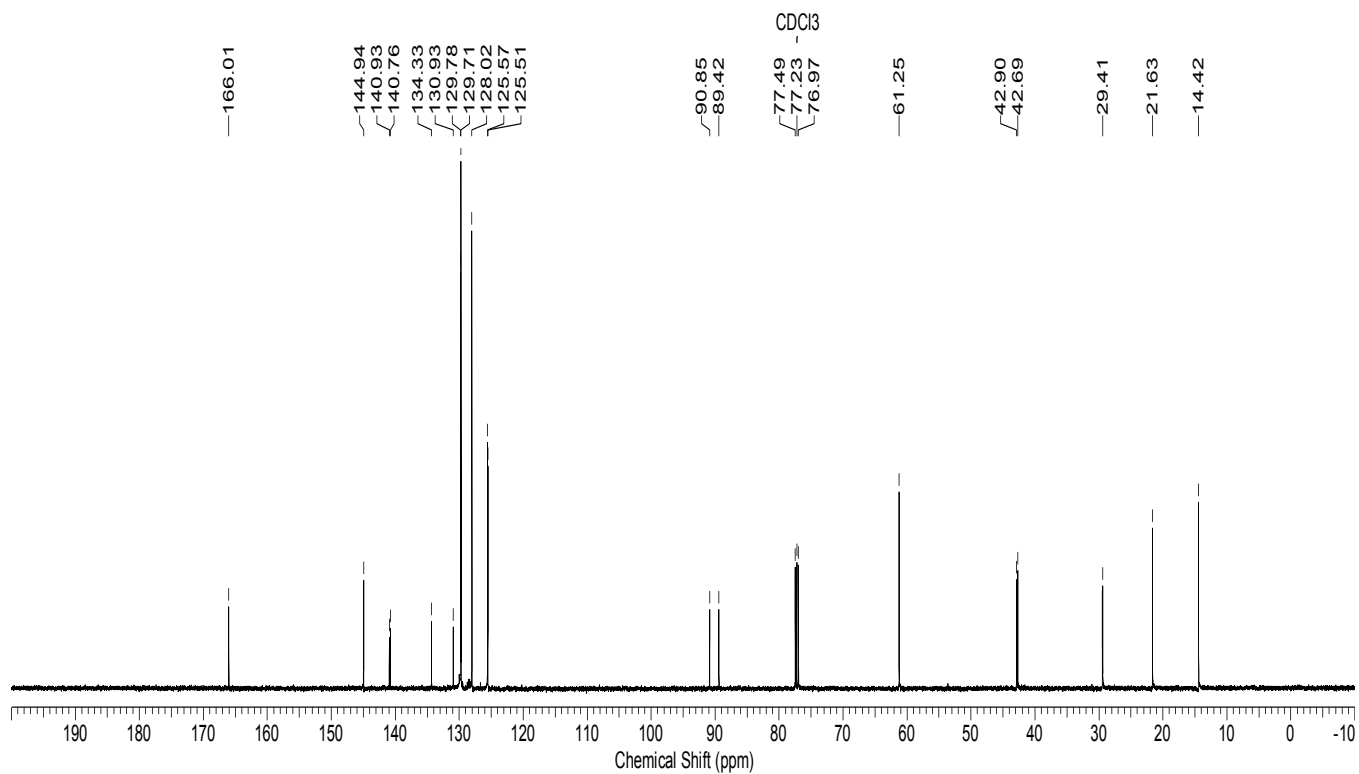

**$^{19}\text{F}$  NMR**  
**470.4 MHz**  
 **$\text{CDCl}_3$**

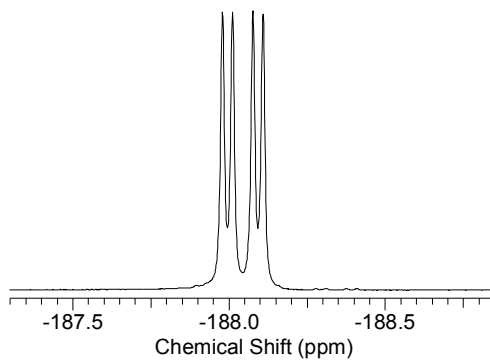

**<sup>1</sup>H NMR**  
**500 MHz**  
**CDCl<sub>3</sub>**

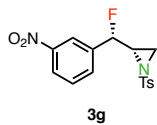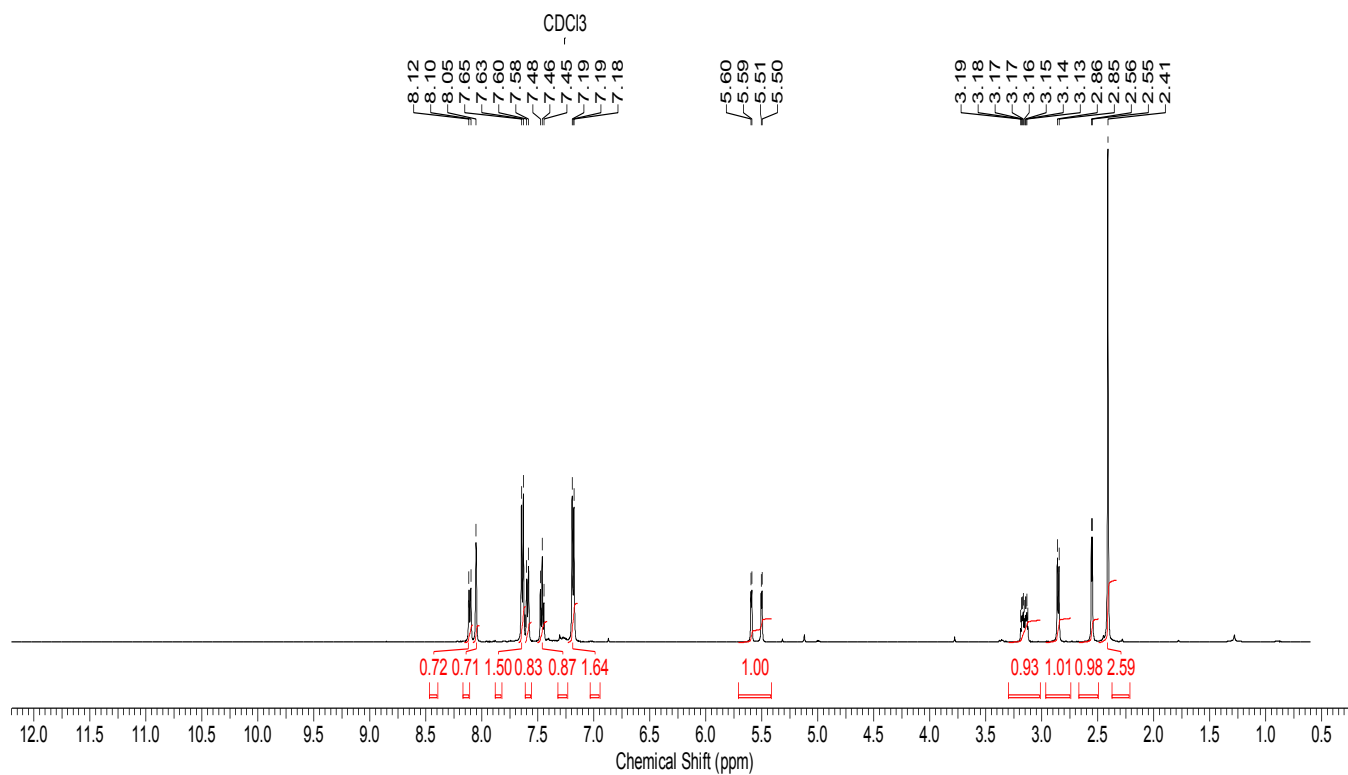

**<sup>13</sup>C NMR**  
**125.7 MHz**  
**CDCl<sub>3</sub>**

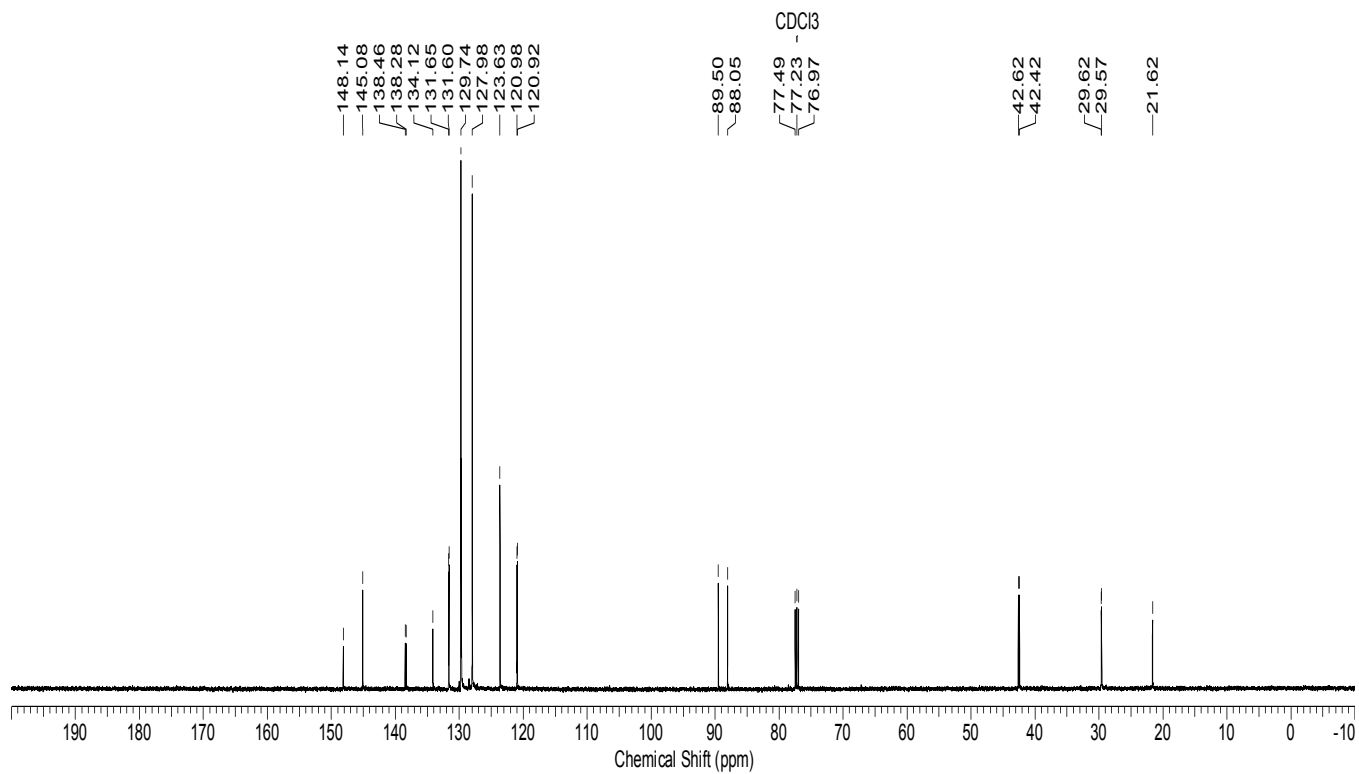

**$^{19}\text{F}$  NMR**  
**470.4 MHz**  
 **$\text{CDCl}_3$**

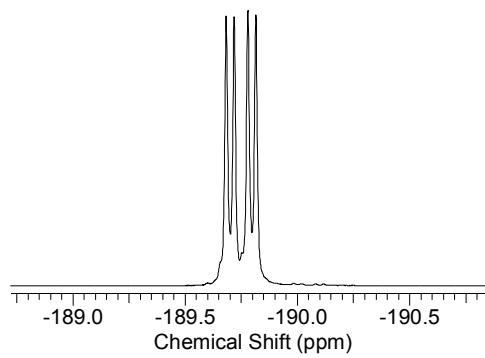

**<sup>1</sup>H NMR**  
**500 MHz**  
**CDCl<sub>3</sub>**

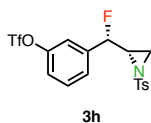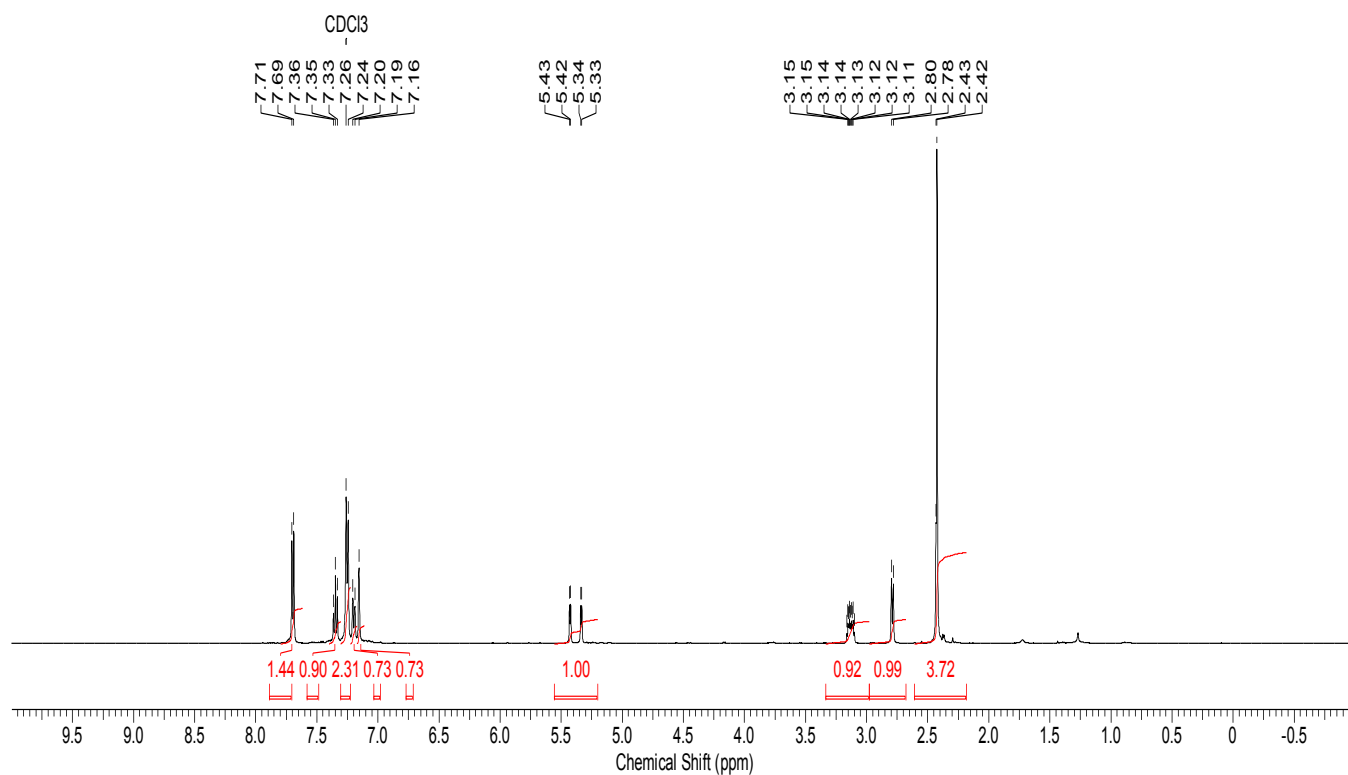

**<sup>13</sup>C NMR**  
**125.7 MHz**  
**CDCl<sub>3</sub>**

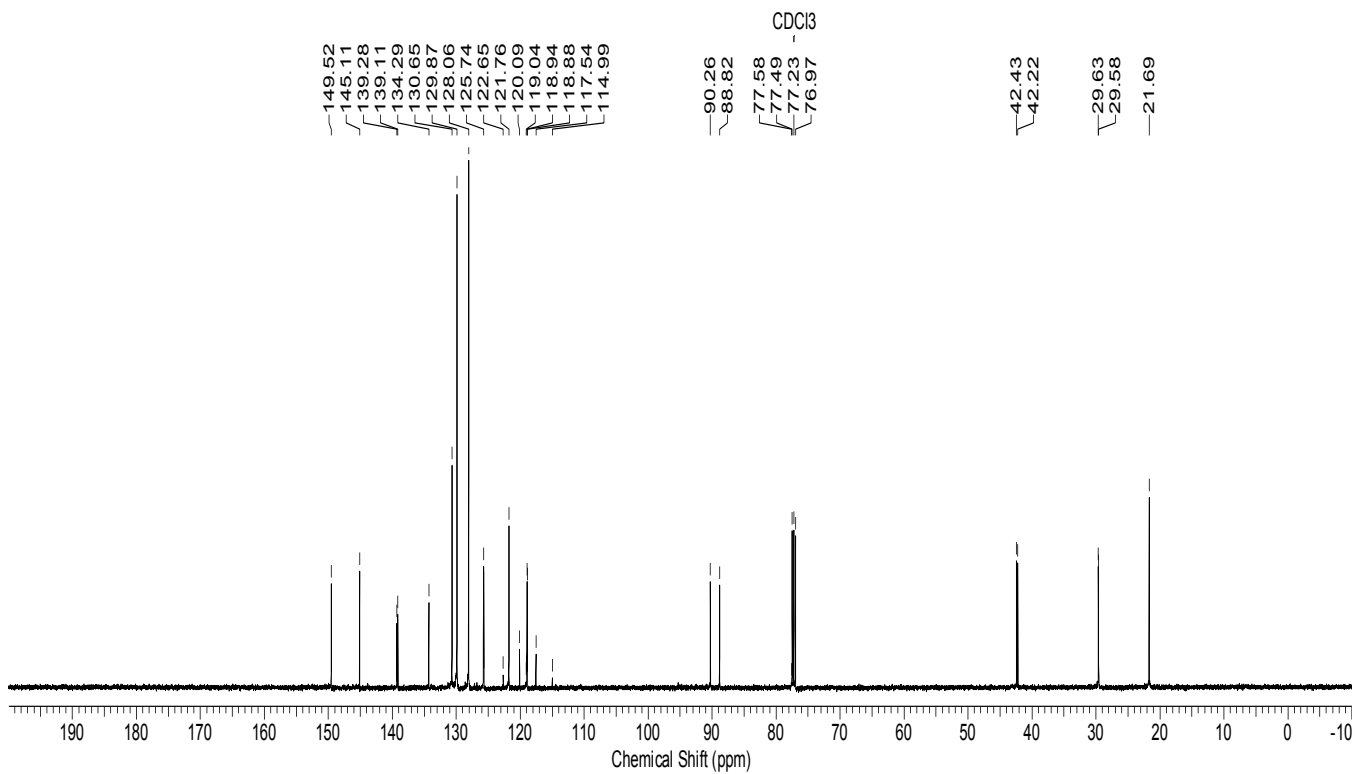

**$^{19}\text{F}$  NMR**  
**470.4 MHz**  
 **$\text{CDCl}_3$**

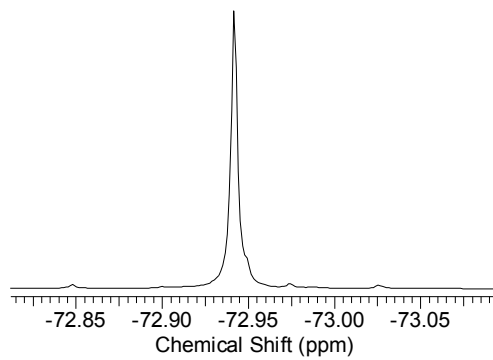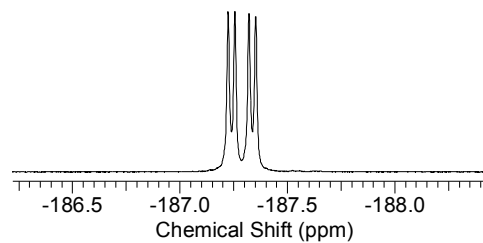

**<sup>1</sup>H NMR**  
**500 MHz**  
**CDCl<sub>3</sub>**

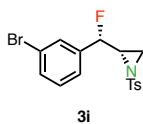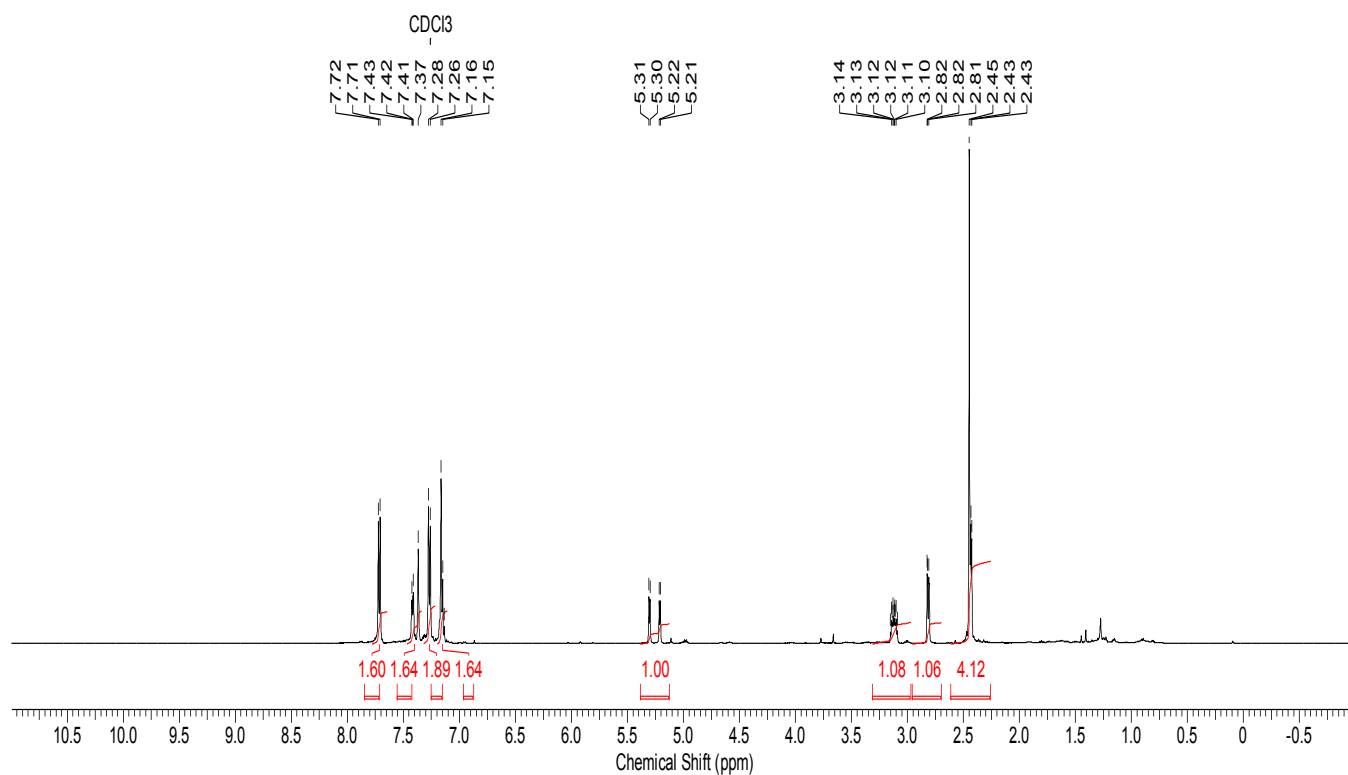

**<sup>13</sup>C NMR**  
**125.7 MHz**  
**CDCl<sub>3</sub>**

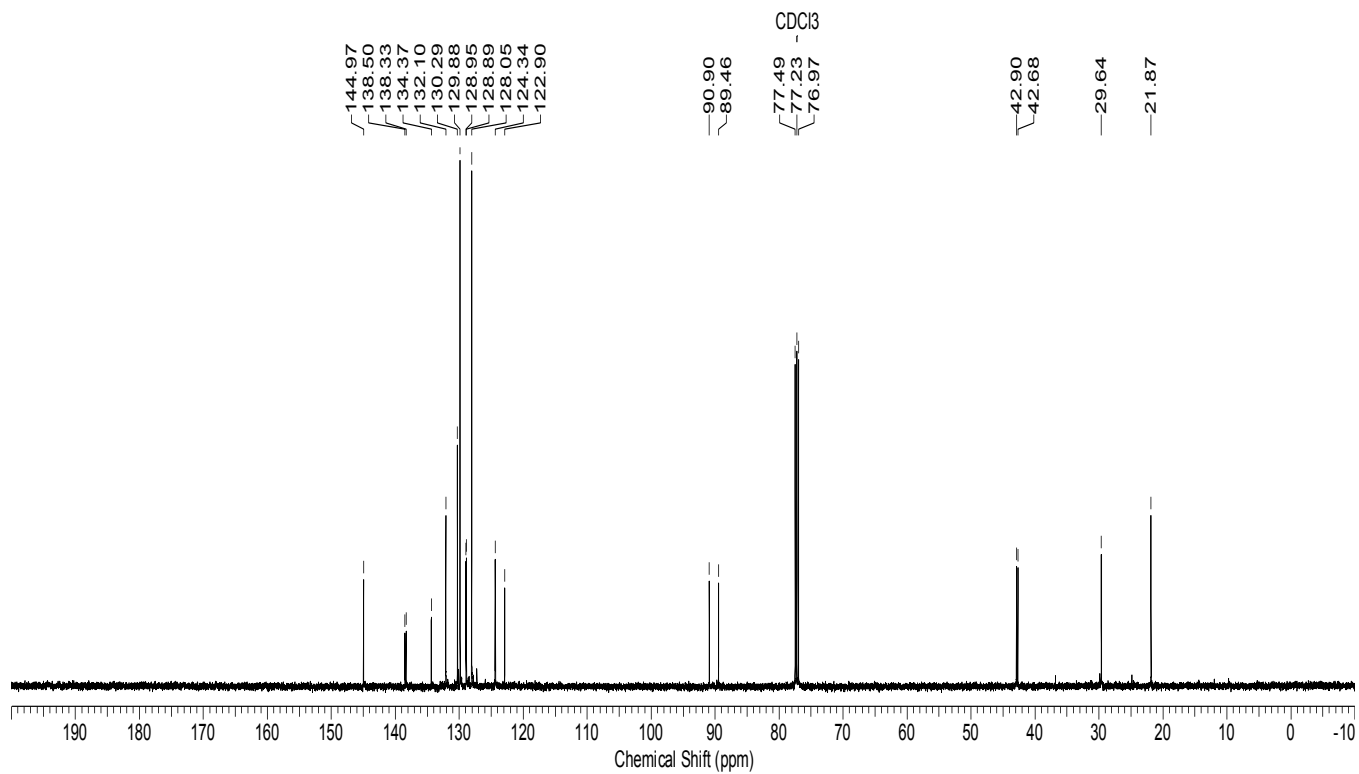

**$^{19}\text{F}$  NMR**  
**470.4 MHz**  
 **$\text{CDCl}_3$**

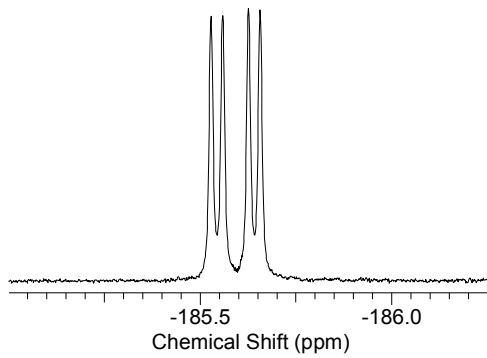



**<sup>1</sup>H NMR**  
**500 MHz**  
**CDCl<sub>3</sub>**

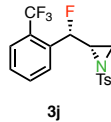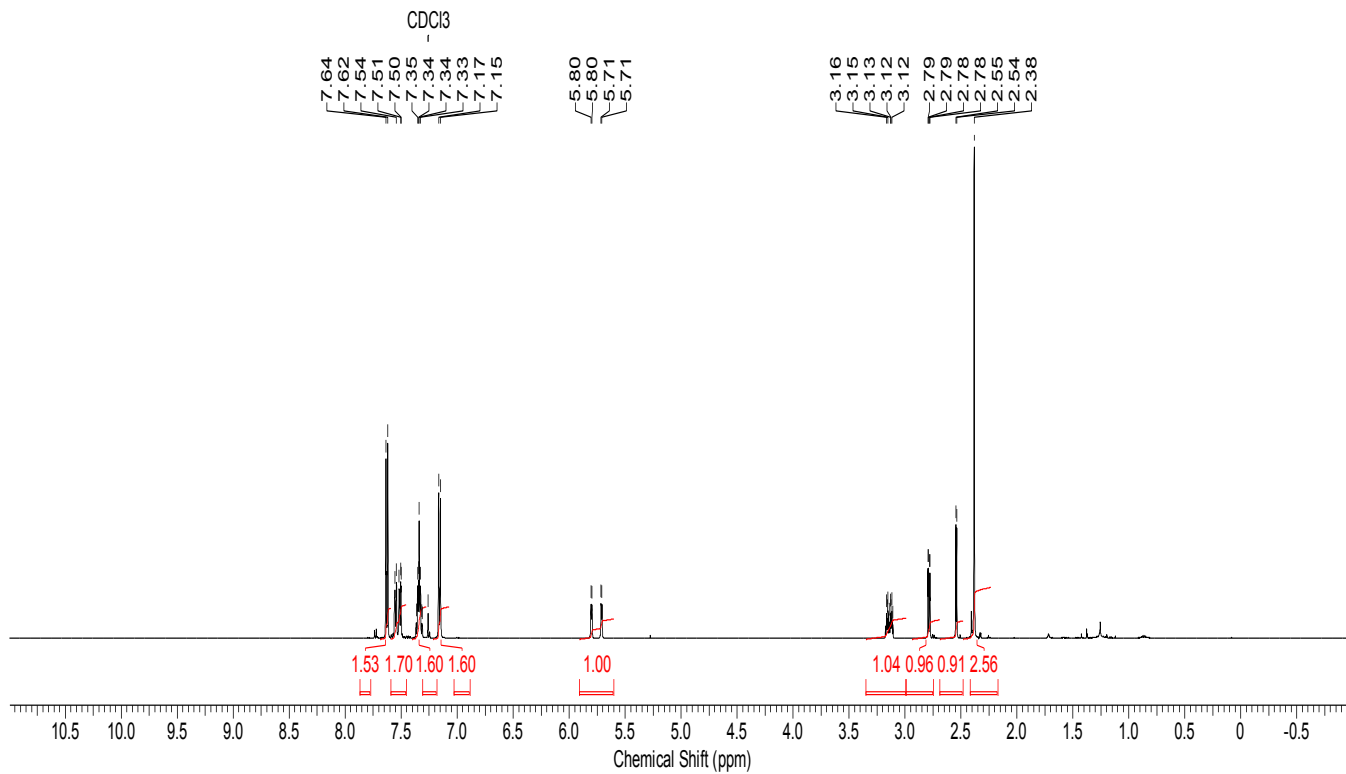

**<sup>13</sup>C NMR**  
**125.7 MHz**  
**CDCl<sub>3</sub>**

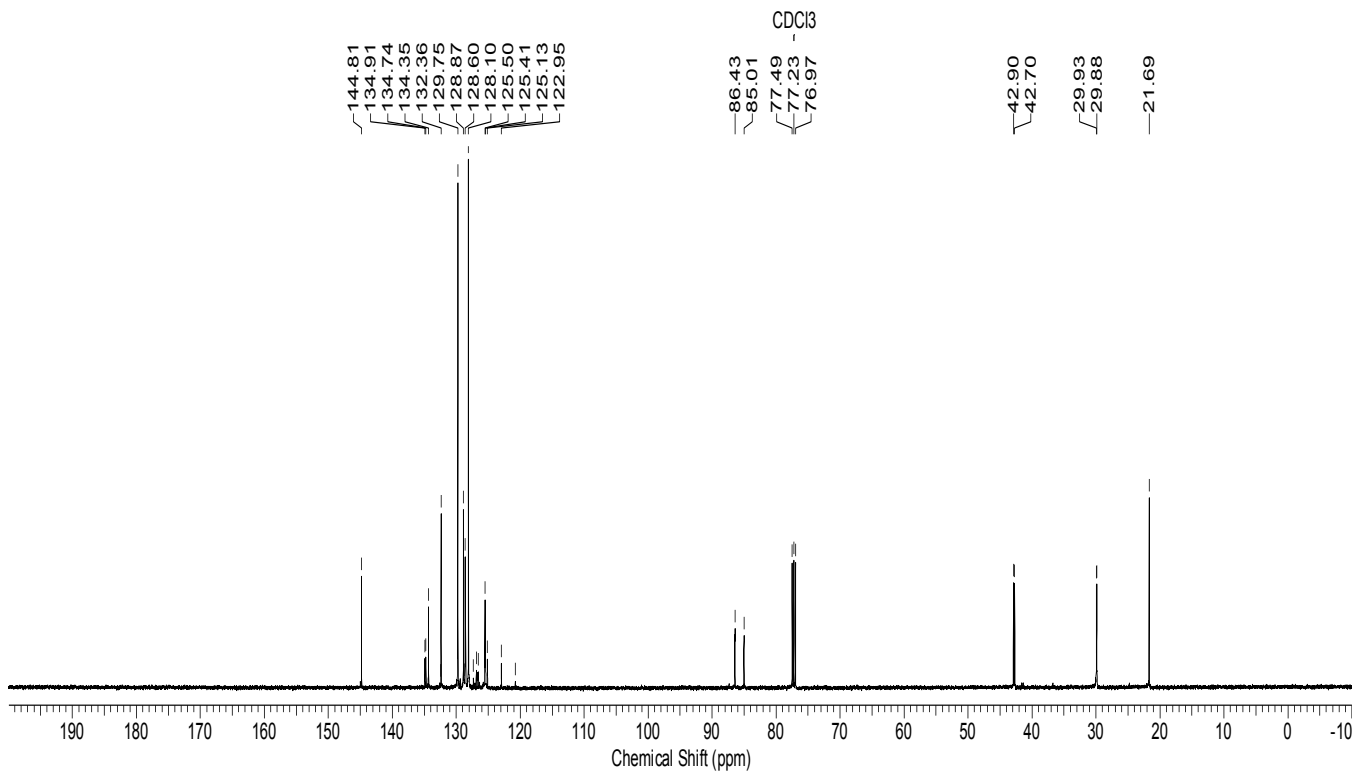

**$^{19}\text{F}$  NMR**  
**470.4 MHz**  
 **$\text{CDCl}_3$**

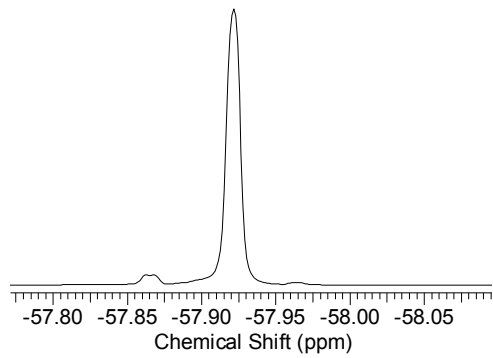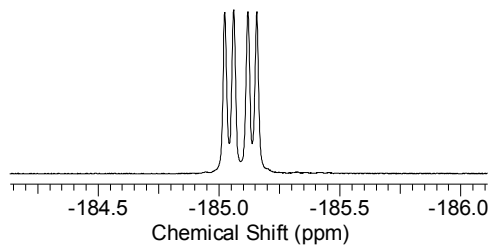

**<sup>1</sup>H NMR**  
**500 MHz**  
**CDCl<sub>3</sub>**

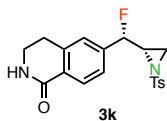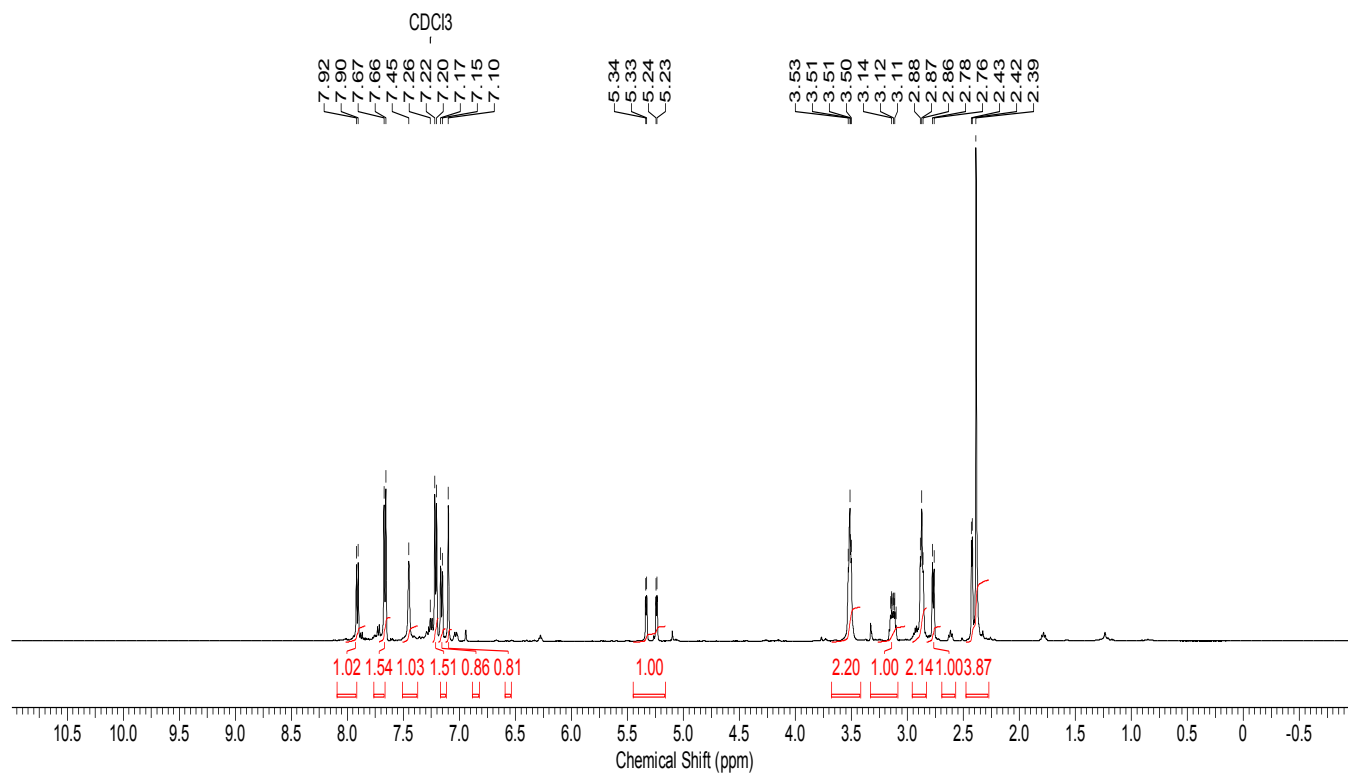

**<sup>13</sup>C NMR**  
**125.7 MHz**  
**CDCl<sub>3</sub>**

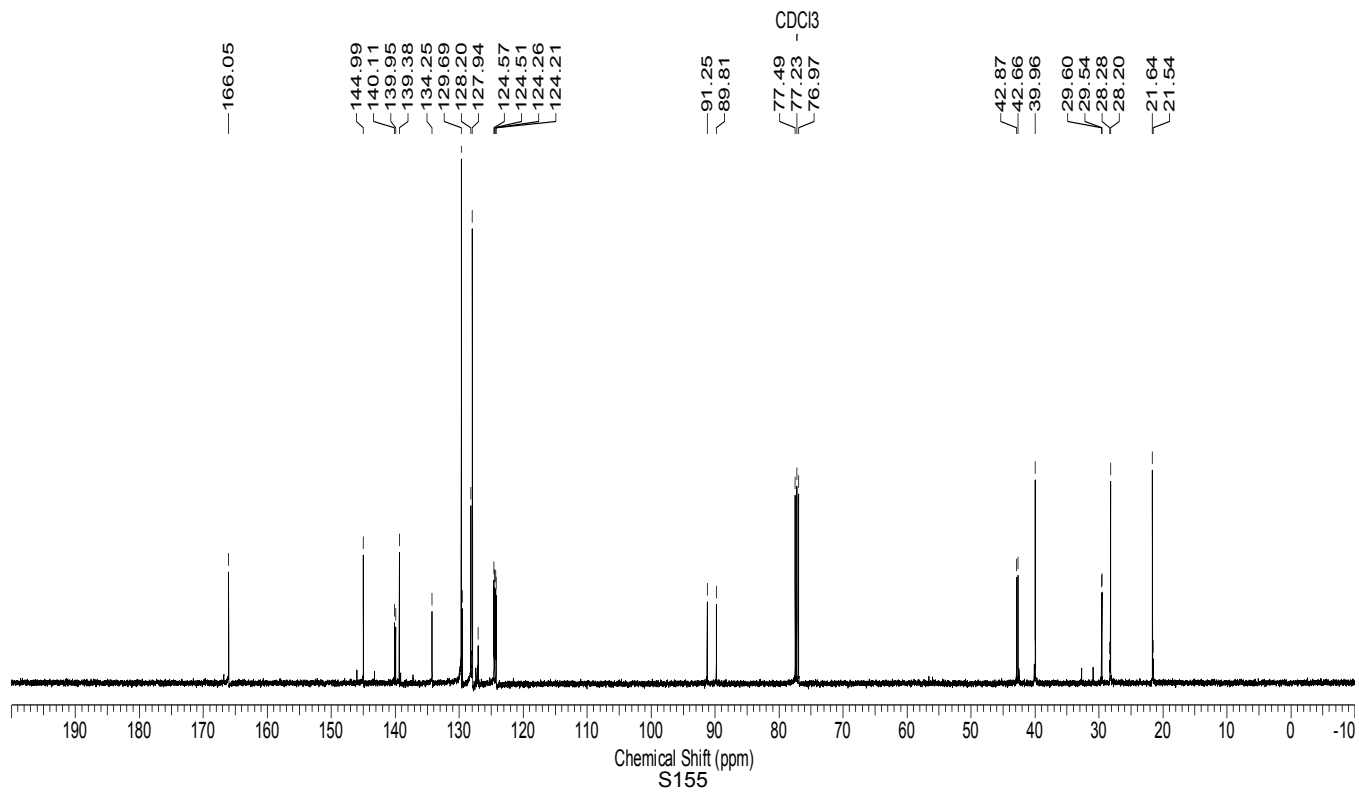

**$^{19}\text{F}$  NMR**  
**470.4 MHz**  
 **$\text{CDCl}_3$**

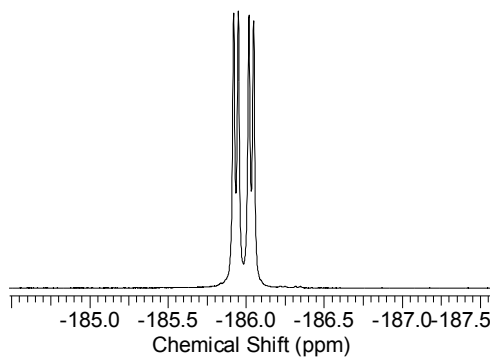

**<sup>1</sup>H NMR**  
**500 MHz**  
**CDCl<sub>3</sub>**

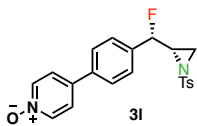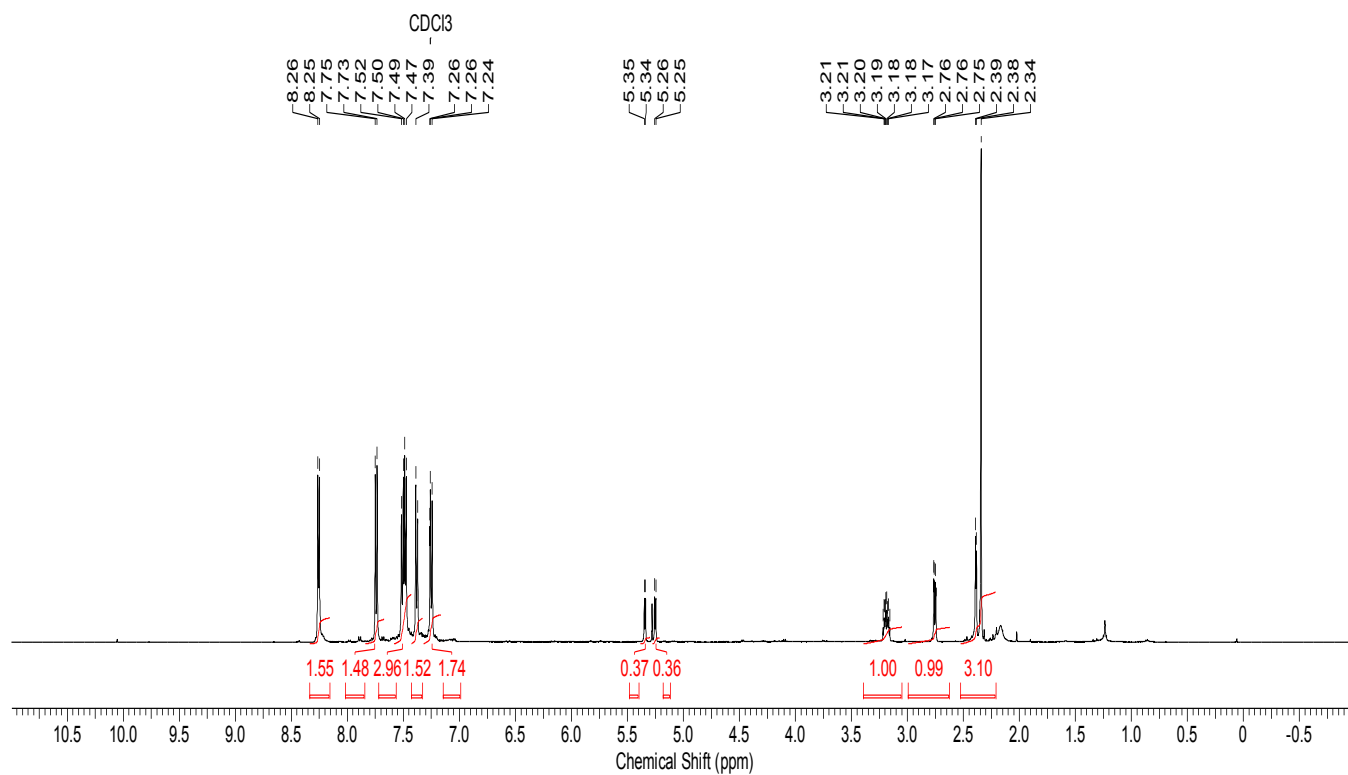

**<sup>13</sup>C NMR**  
**125.7 MHz**  
**CDCl<sub>3</sub>**

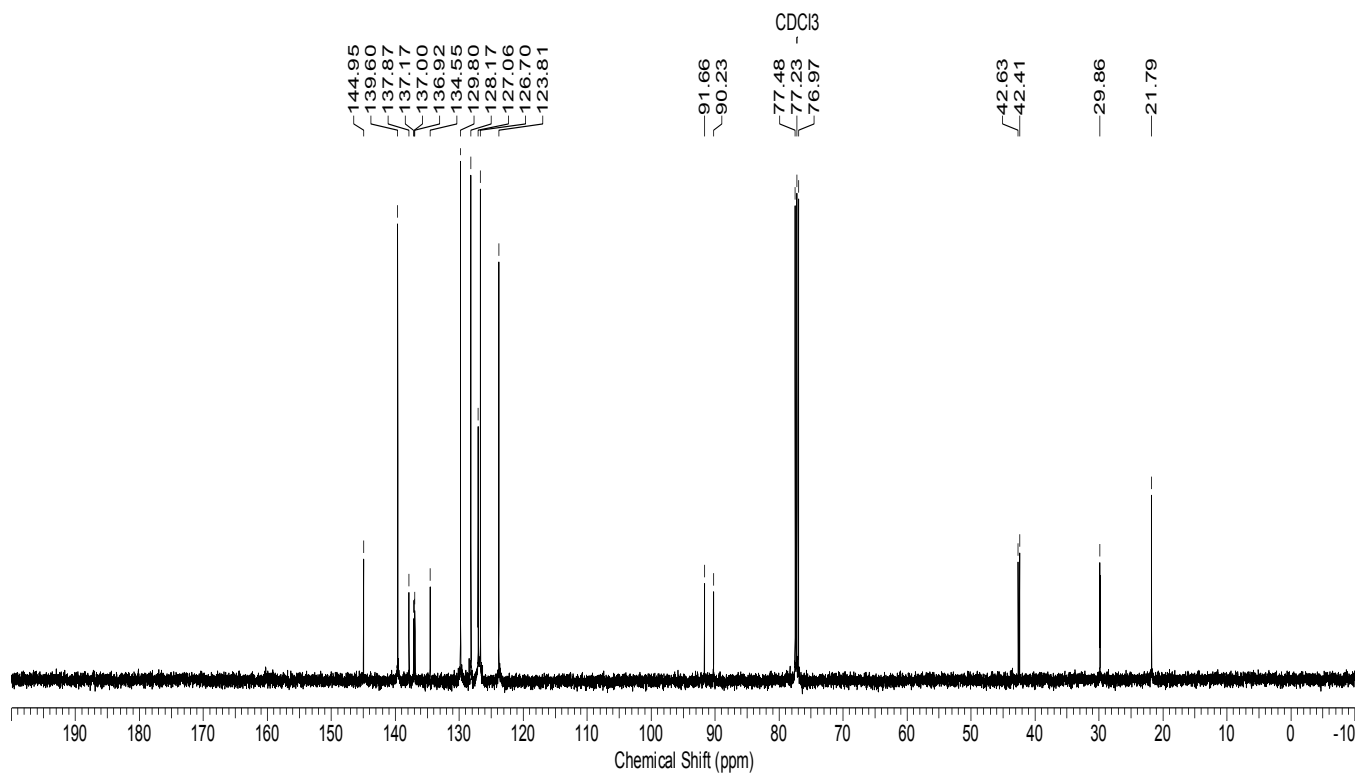

**$^{19}\text{F}$  NMR**  
**470.4 MHz**  
 **$\text{CDCl}_3$**

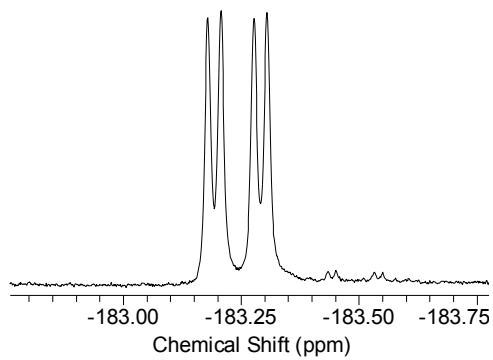

**<sup>1</sup>H NMR**  
**500 MHz**  
**DMSO-d<sub>6</sub>**

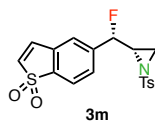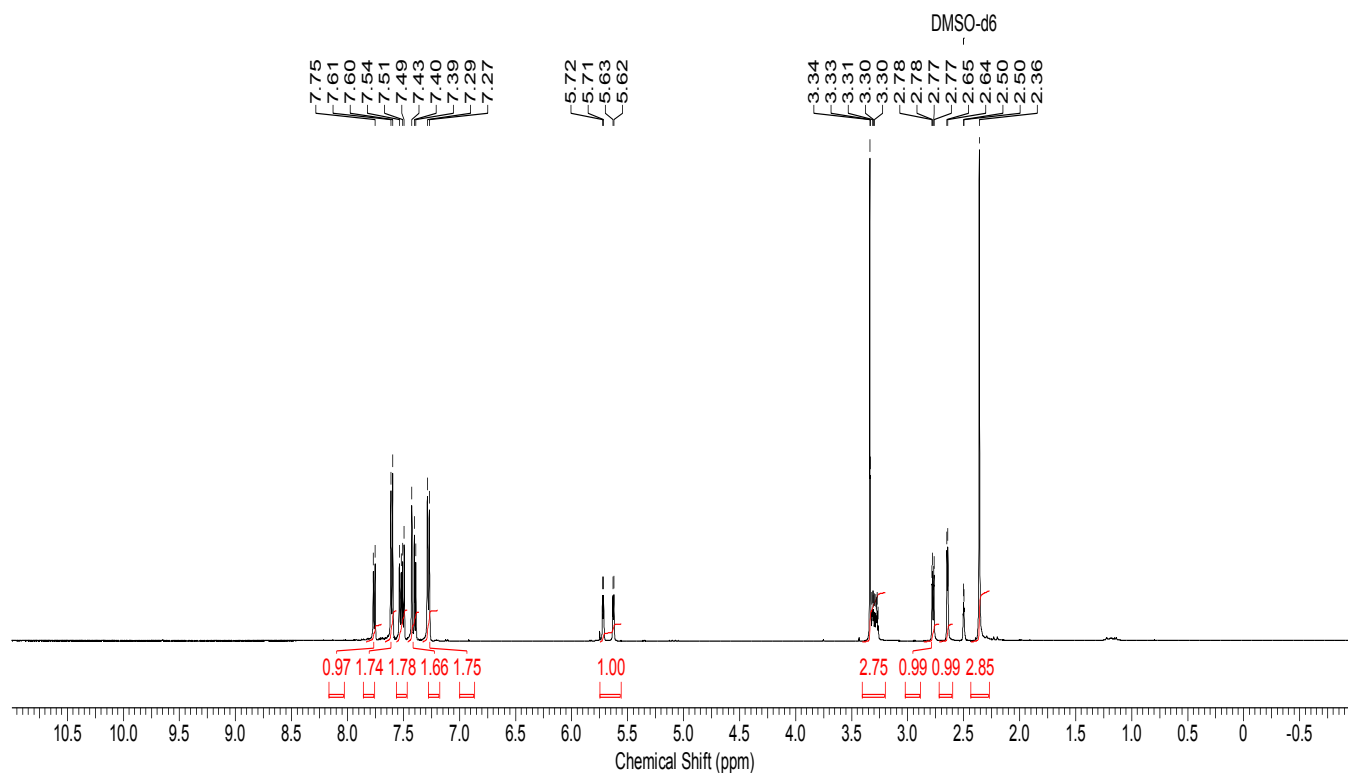

**<sup>13</sup>C NMR**  
**125.7 MHz**  
**CDCl<sub>3</sub>**

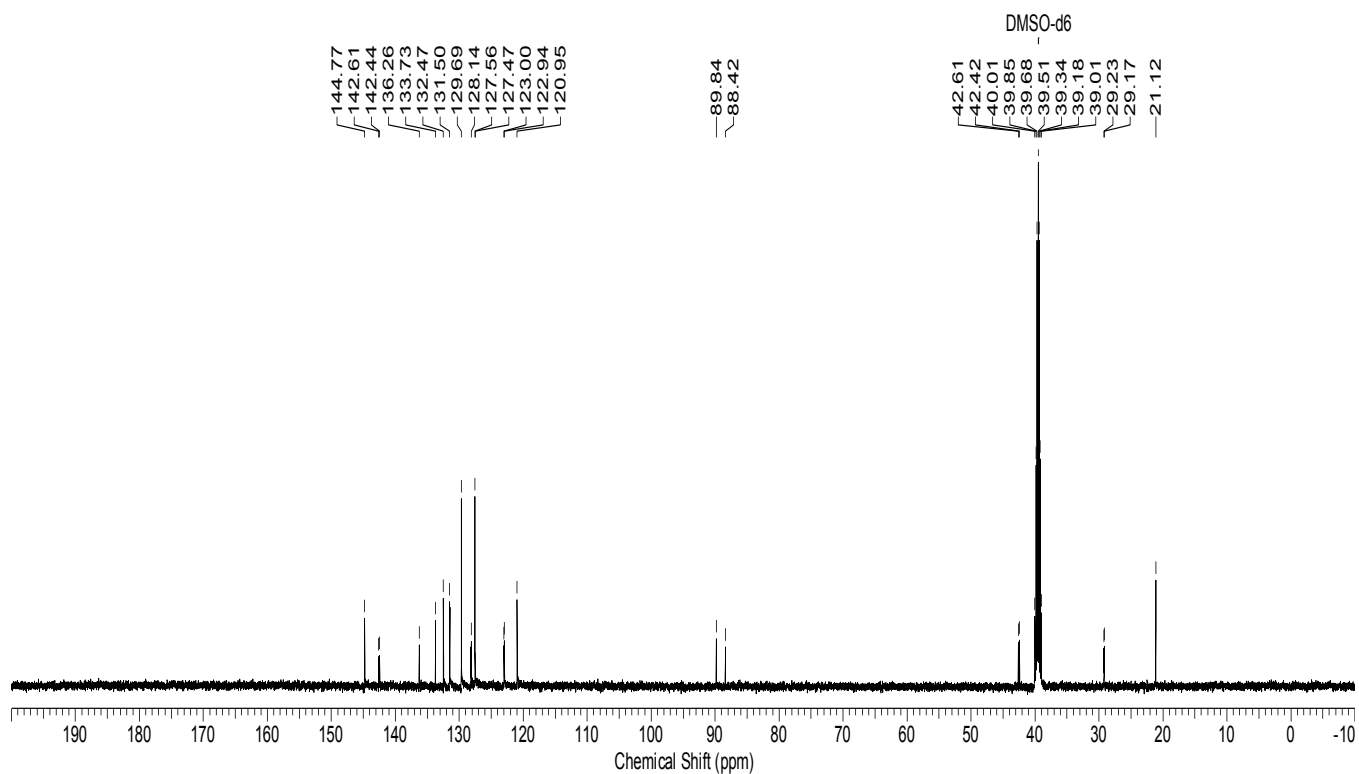

**<sup>19</sup>F NMR**  
**470.4 MHz**  
**DMSO-*d*<sub>6</sub>**

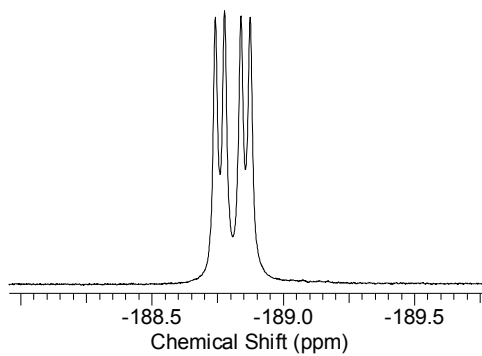



**<sup>1</sup>H NMR**  
**500 MHz**  
**CDCl<sub>3</sub>**

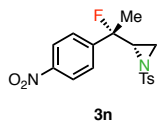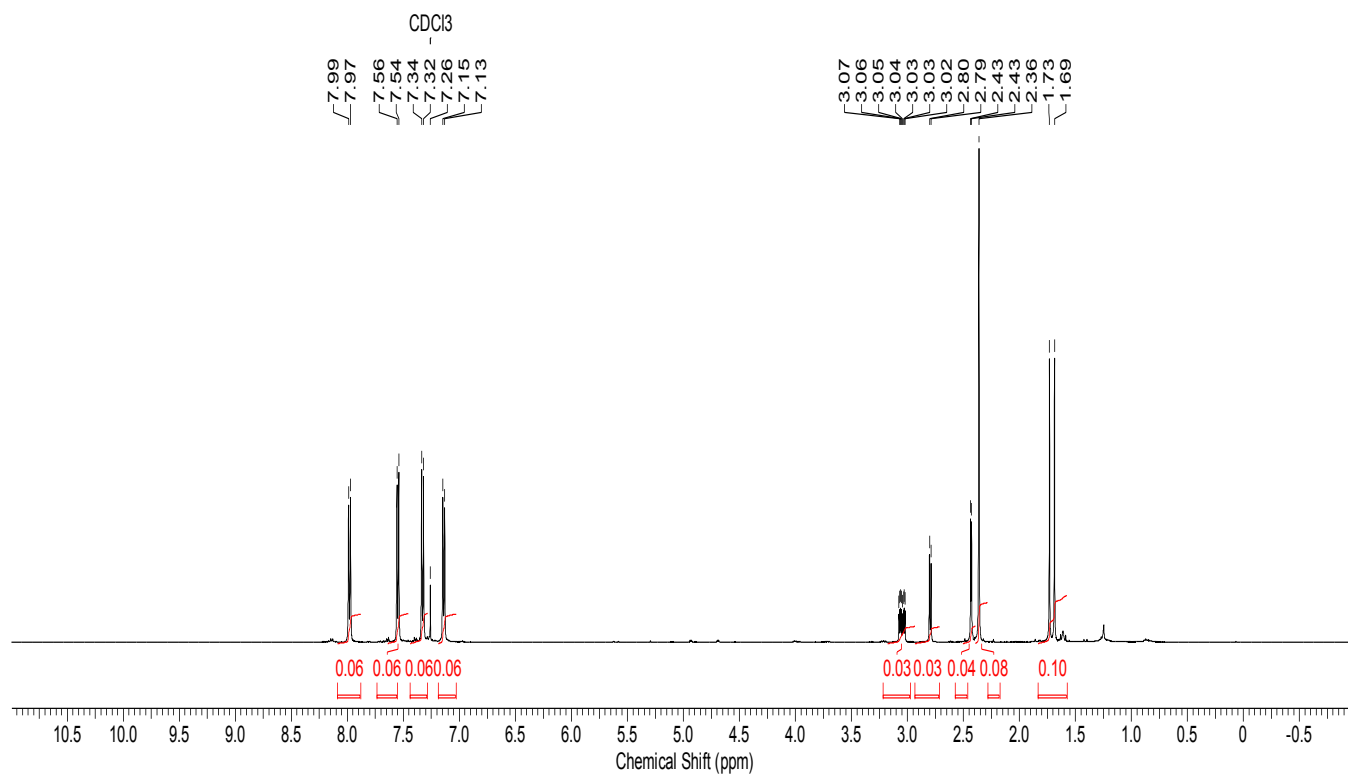

**<sup>13</sup>C NMR**  
**125.7 MHz**  
**CDCl<sub>3</sub>**

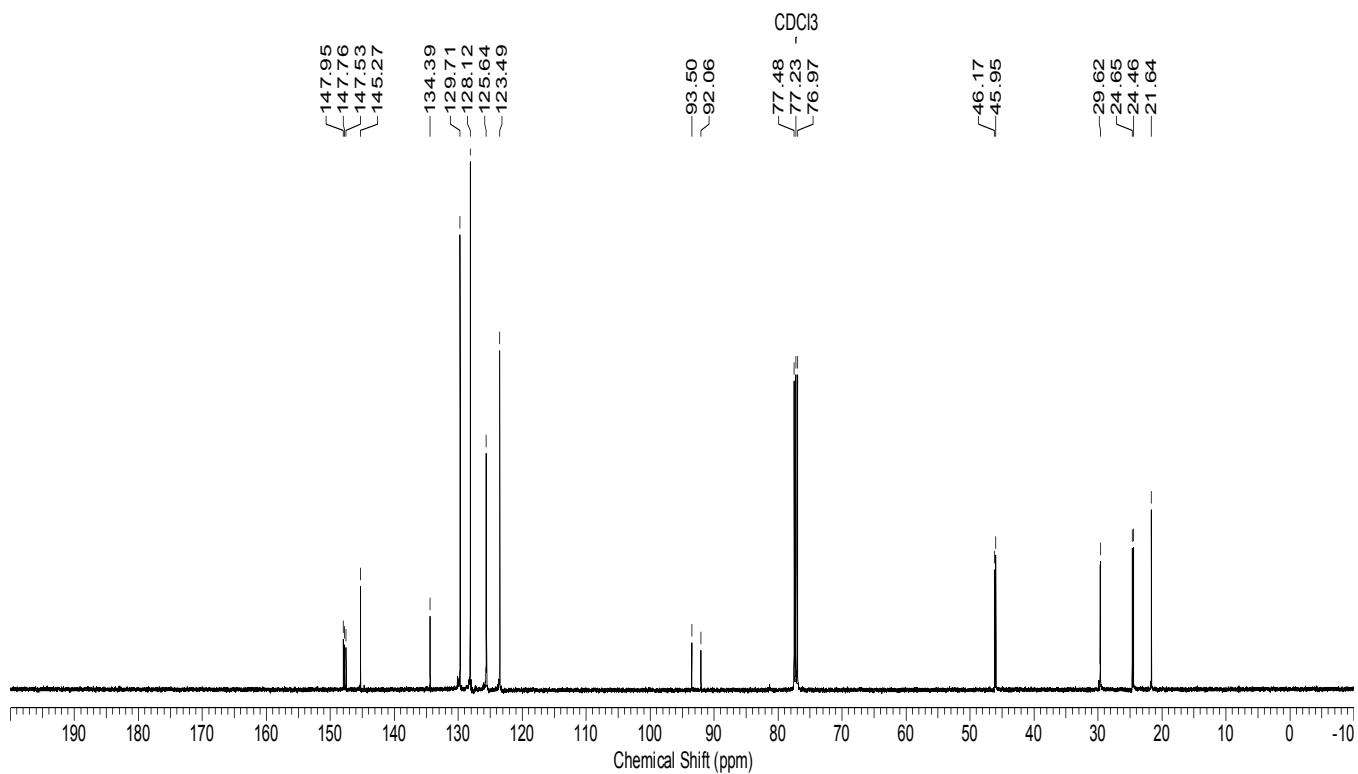

**$^{19}\text{F}$  NMR**  
**470.4 MHz**  
 **$\text{CDCl}_3$**

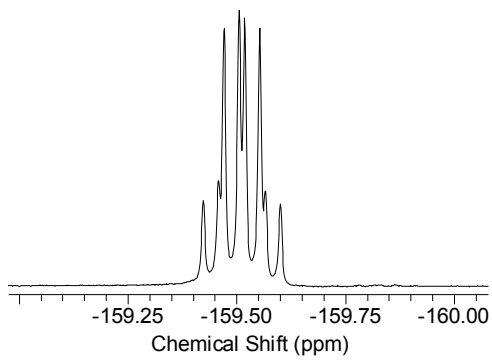

**<sup>1</sup>H NMR**  
**600 MHz**  
**CDCl<sub>3</sub>**

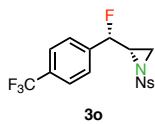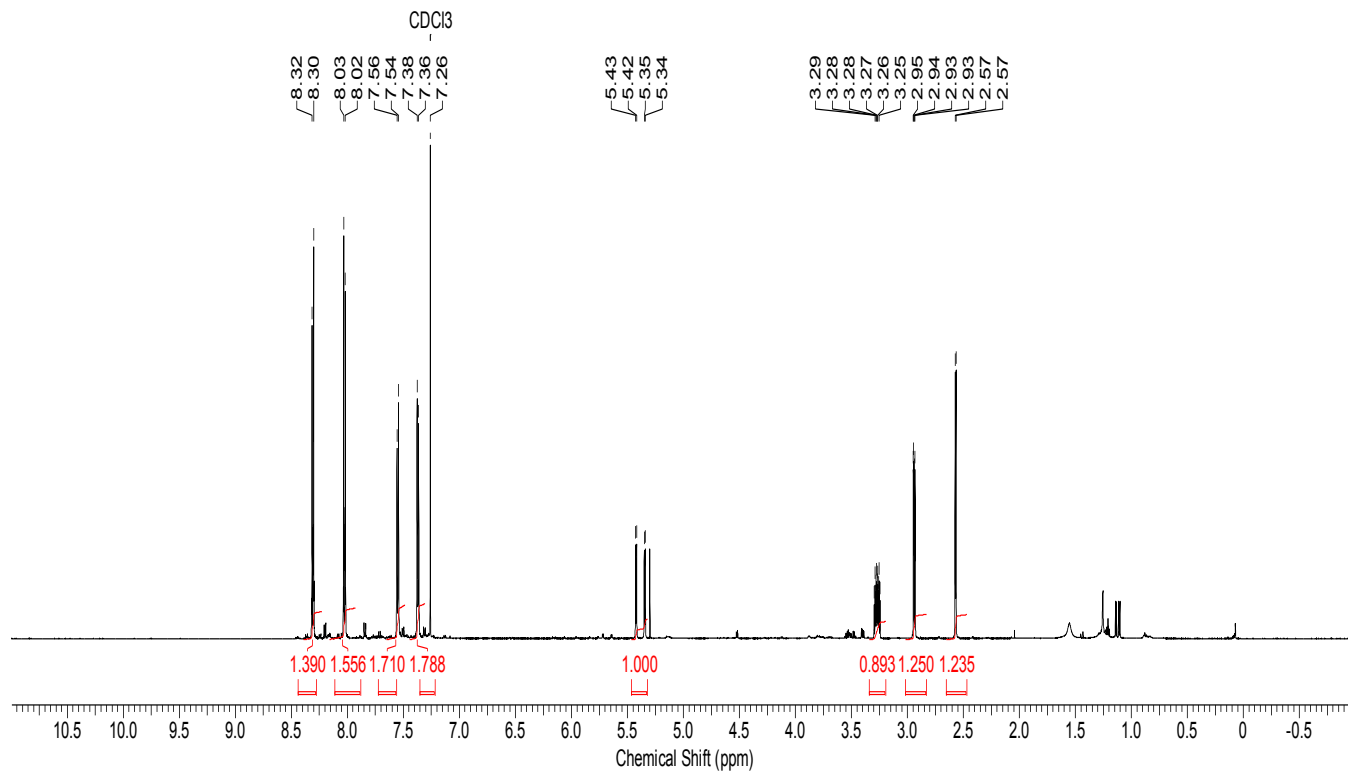

**<sup>13</sup>C NMR**  
**125.7 MHz**  
**CDCl<sub>3</sub>**

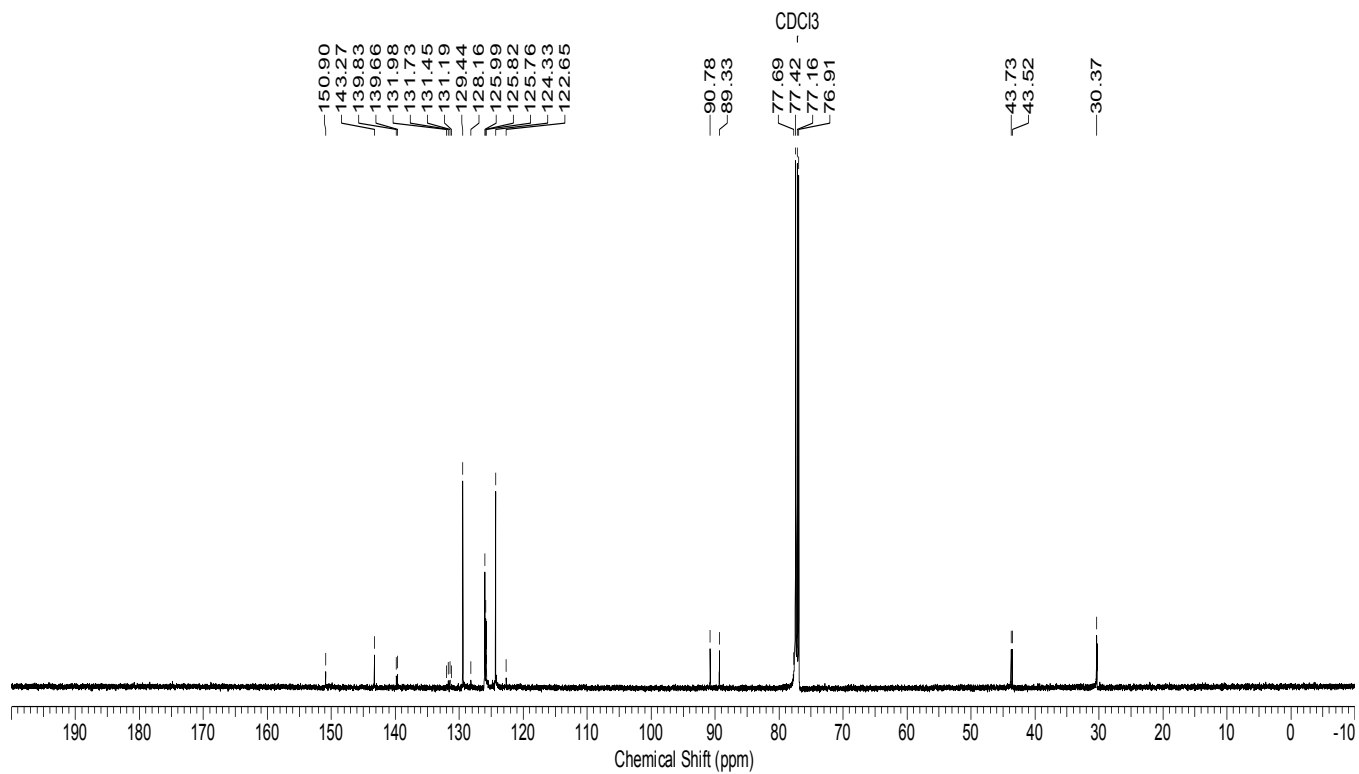

**$^{19}\text{F}$  NMR**  
**470.4 MHz**  
 **$\text{CDCl}_3$**

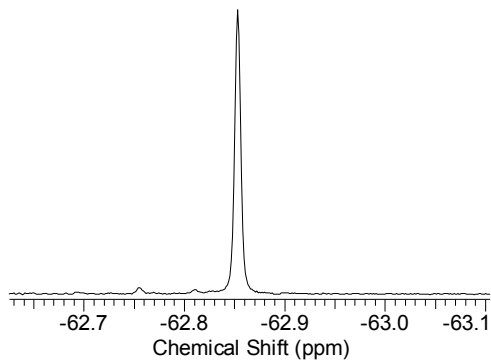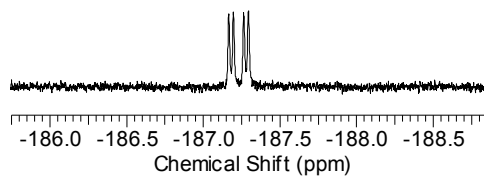

**<sup>1</sup>H NMR**  
**500 MHz**  
**CDCl<sub>3</sub>**

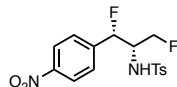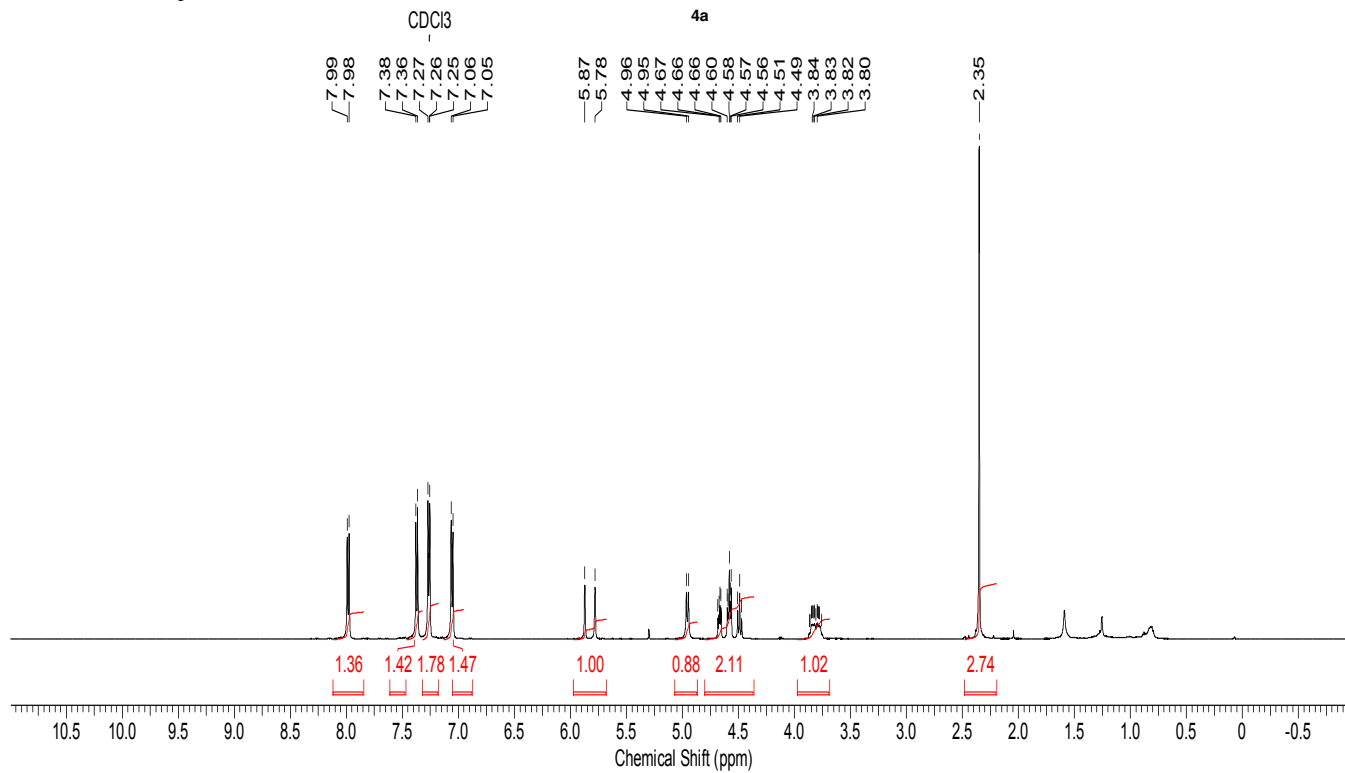

**<sup>13</sup>C NMR**  
**125.7 MHz**  
**10% CD<sub>3</sub>OD/CDCl<sub>3</sub>**

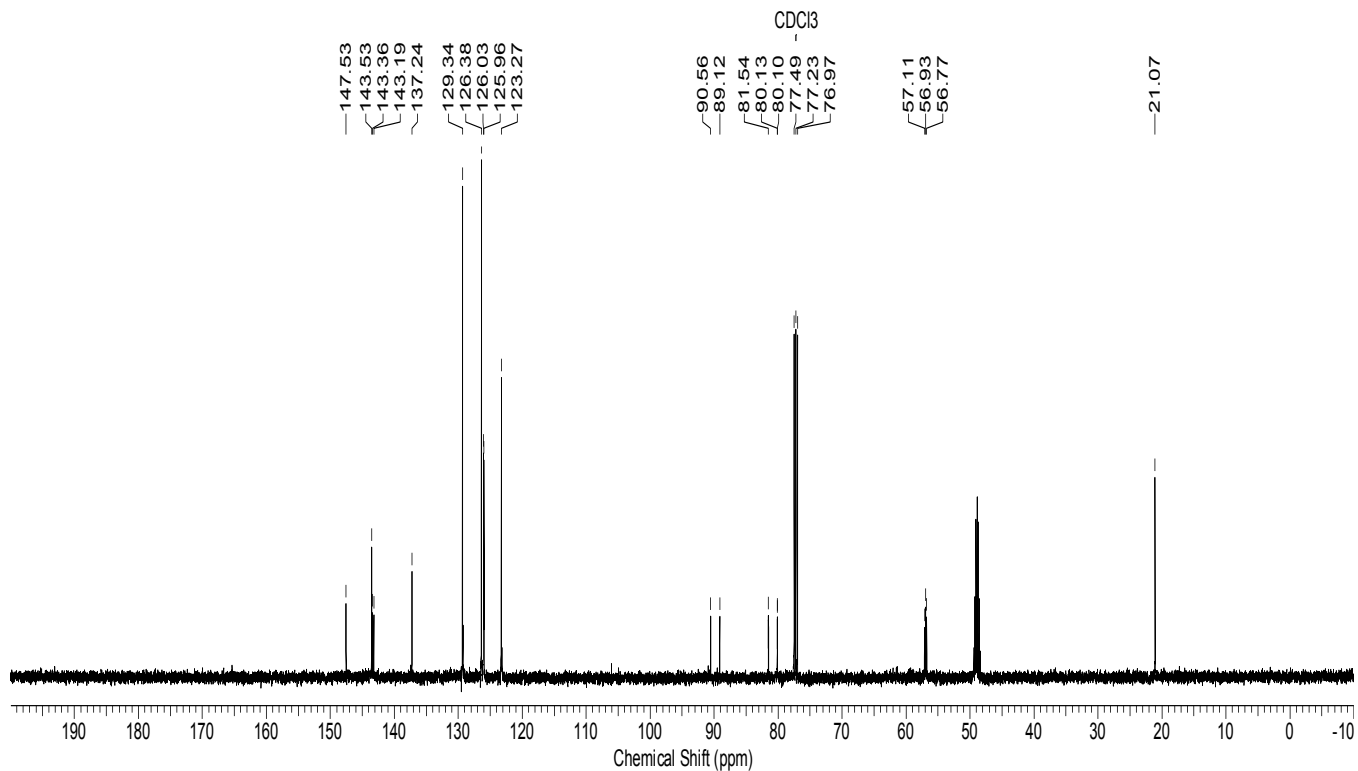

**$^{19}\text{F}$  NMR**  
**470.4 MHz**  
 **$\text{CDCl}_3$**

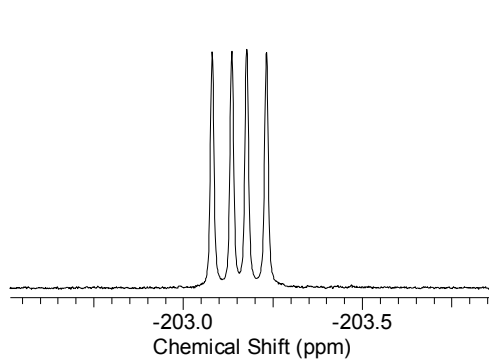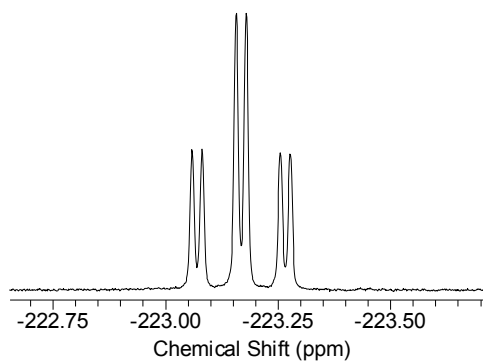

**<sup>1</sup>H NMR**  
**500 MHz**  
**CDCl<sub>3</sub>**

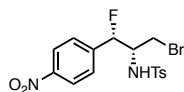

**4b**

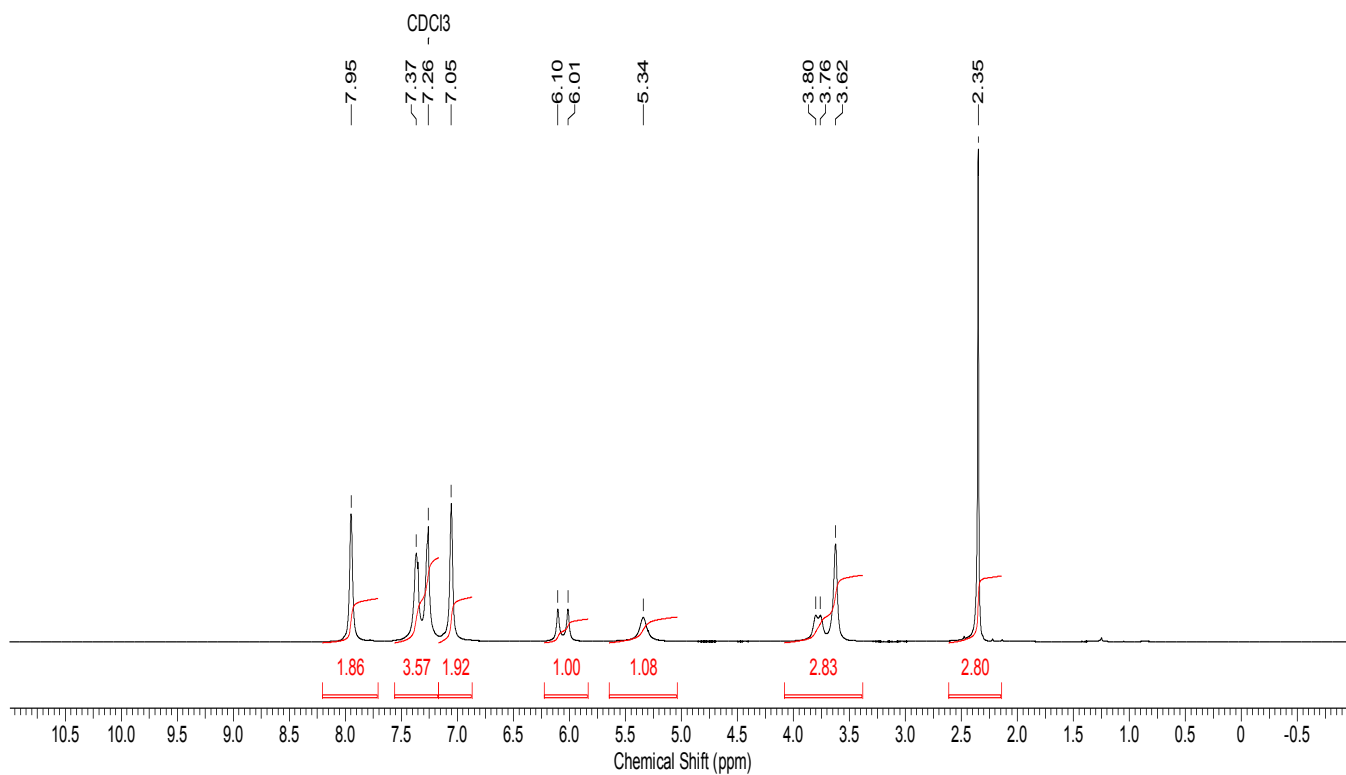

**<sup>13</sup>C NMR**  
**125.7 MHz**  
**CDCl<sub>3</sub>**

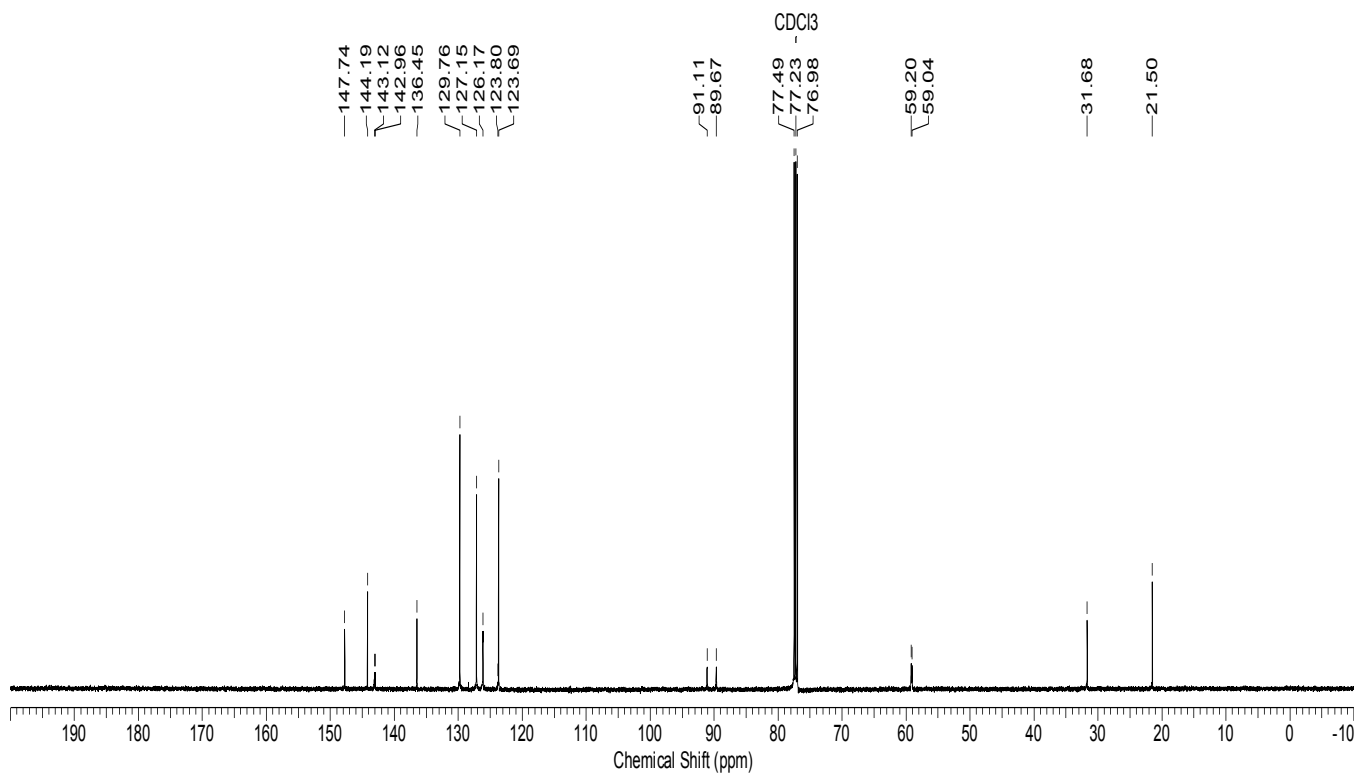

S167

**<sup>19</sup>F NMR**  
**470.4 MHz**  
**CDCl<sub>3</sub>**

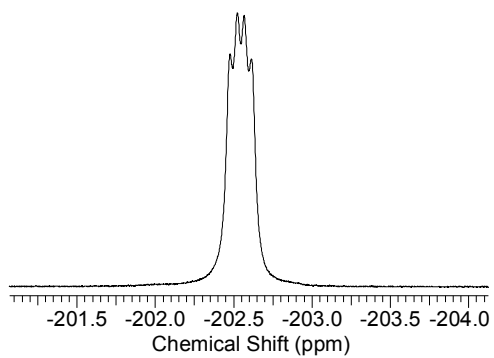



**<sup>1</sup>H NMR**  
**500 MHz**  
**CDCl<sub>3</sub>**

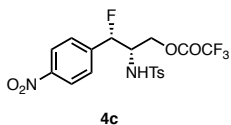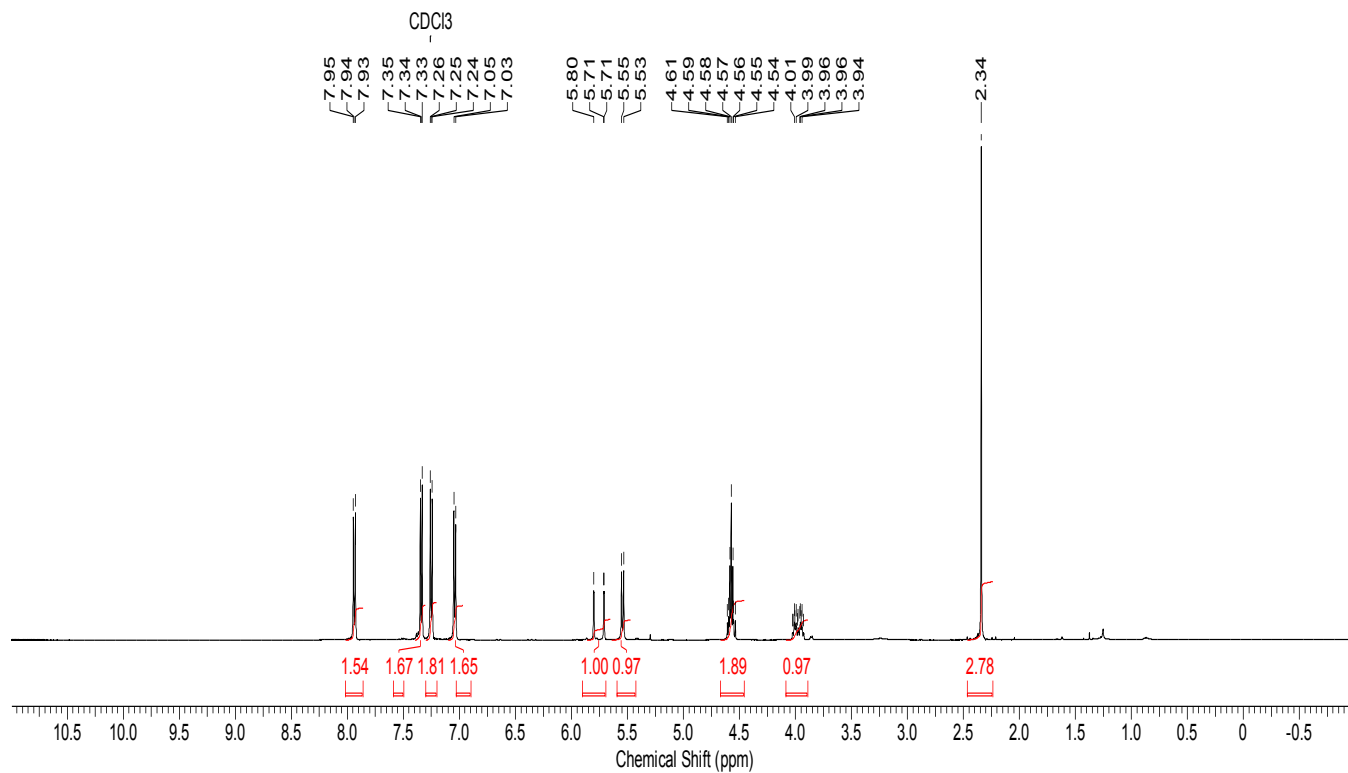

**<sup>13</sup>C NMR**  
**125.7 MHz**  
**CDCl<sub>3</sub>**

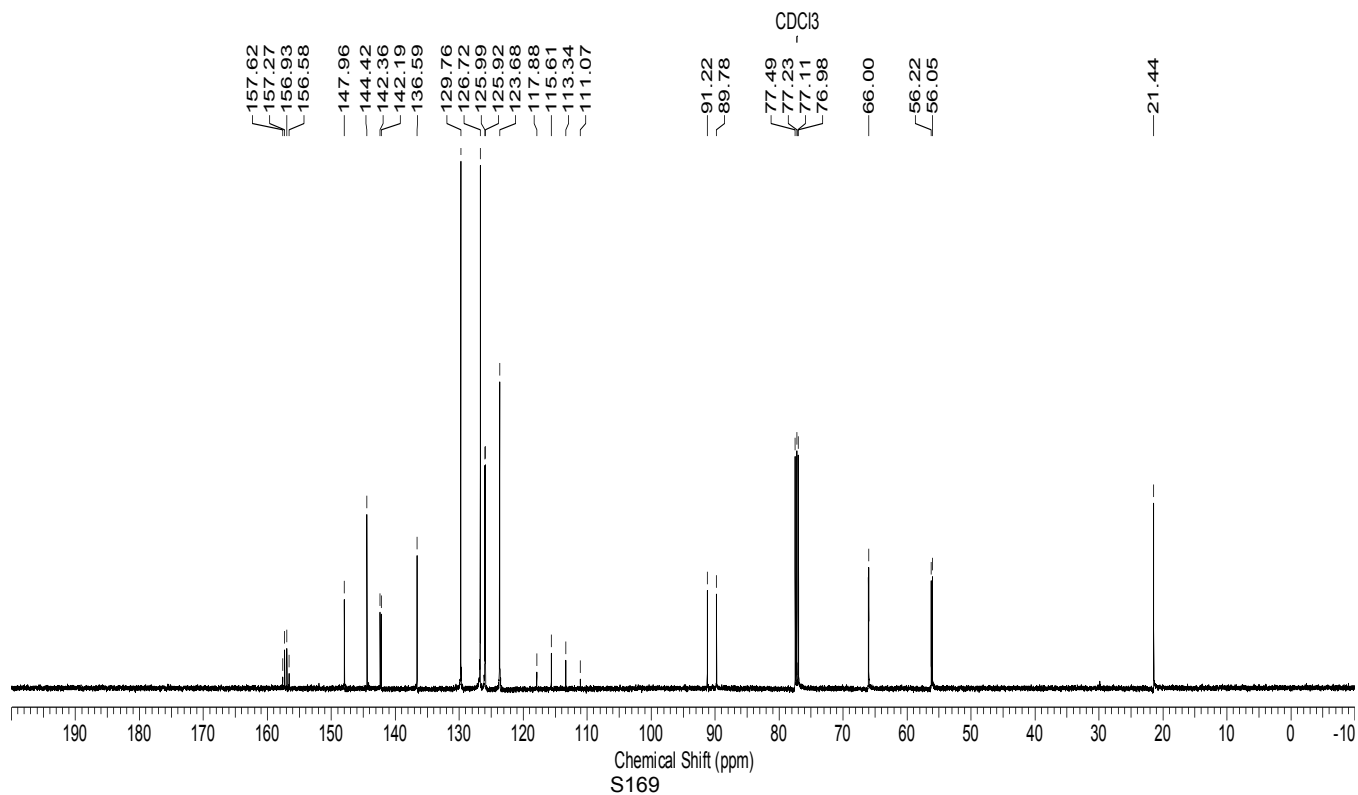

**$^{19}\text{F}$  NMR**  
**470.4 MHz**  
 **$\text{CDCl}_3$**

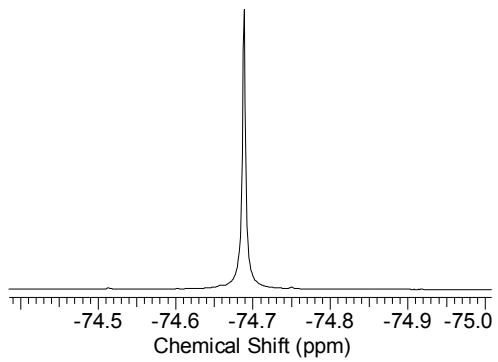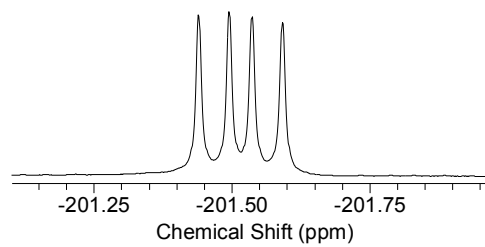

**<sup>1</sup>H NMR**  
**500 MHz**  
**CD<sub>3</sub>CN**

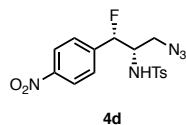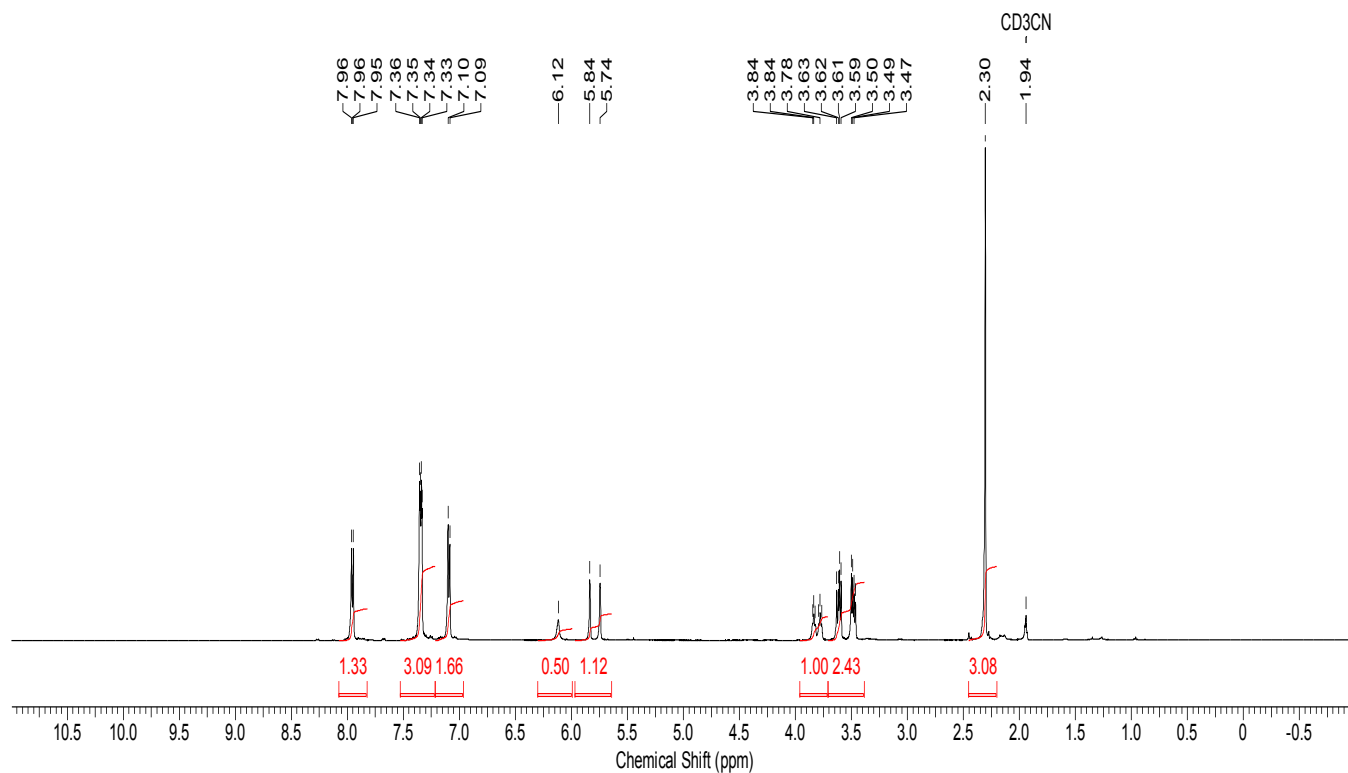

**<sup>13</sup>C NMR**  
**125.7 MHz**  
**CD<sub>3</sub>CN**

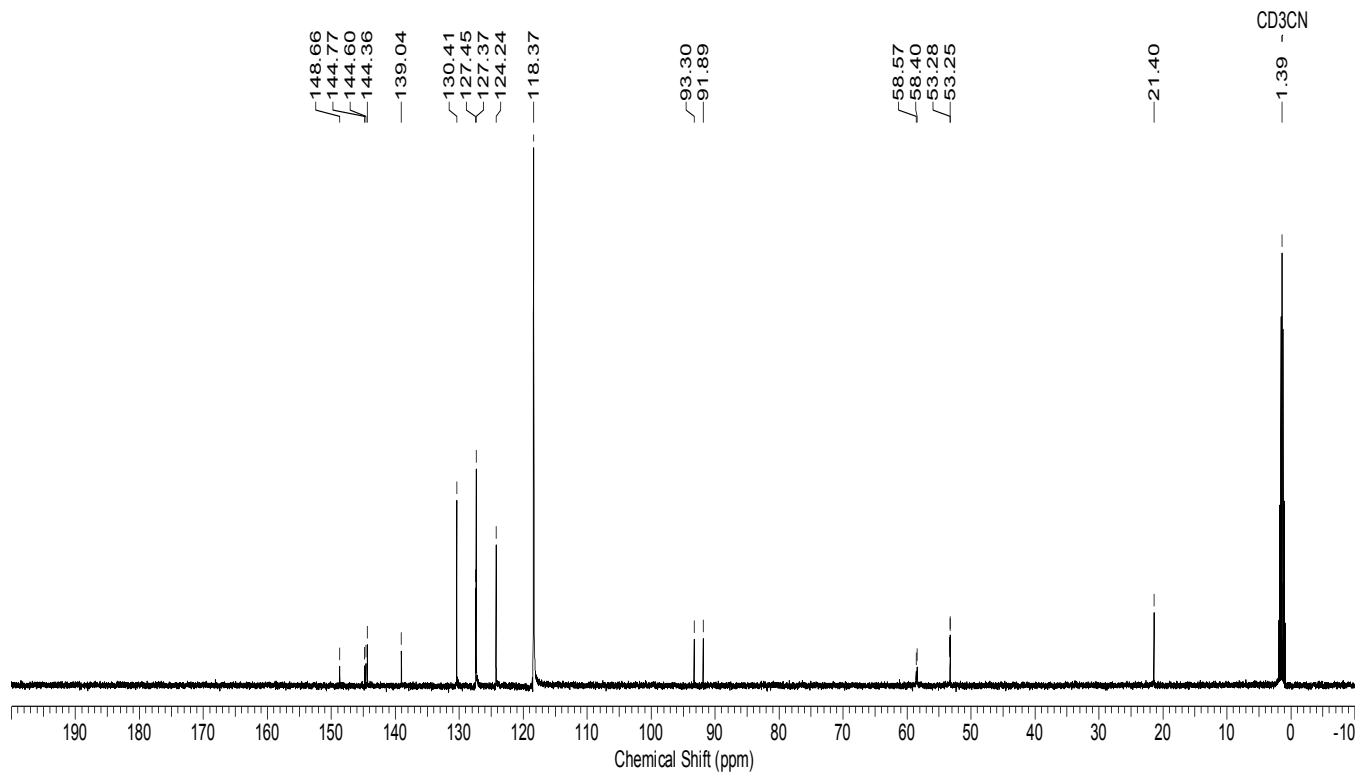

**$^{19}\text{F}$  NMR**  
**470.4 MHz**  
 **$\text{CD}_3\text{CN}$**

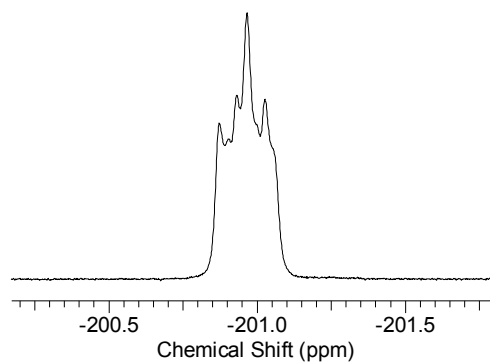

**<sup>1</sup>H NMR**  
**500 MHz**  
**CDCl<sub>3</sub>**

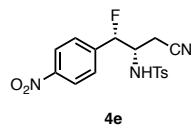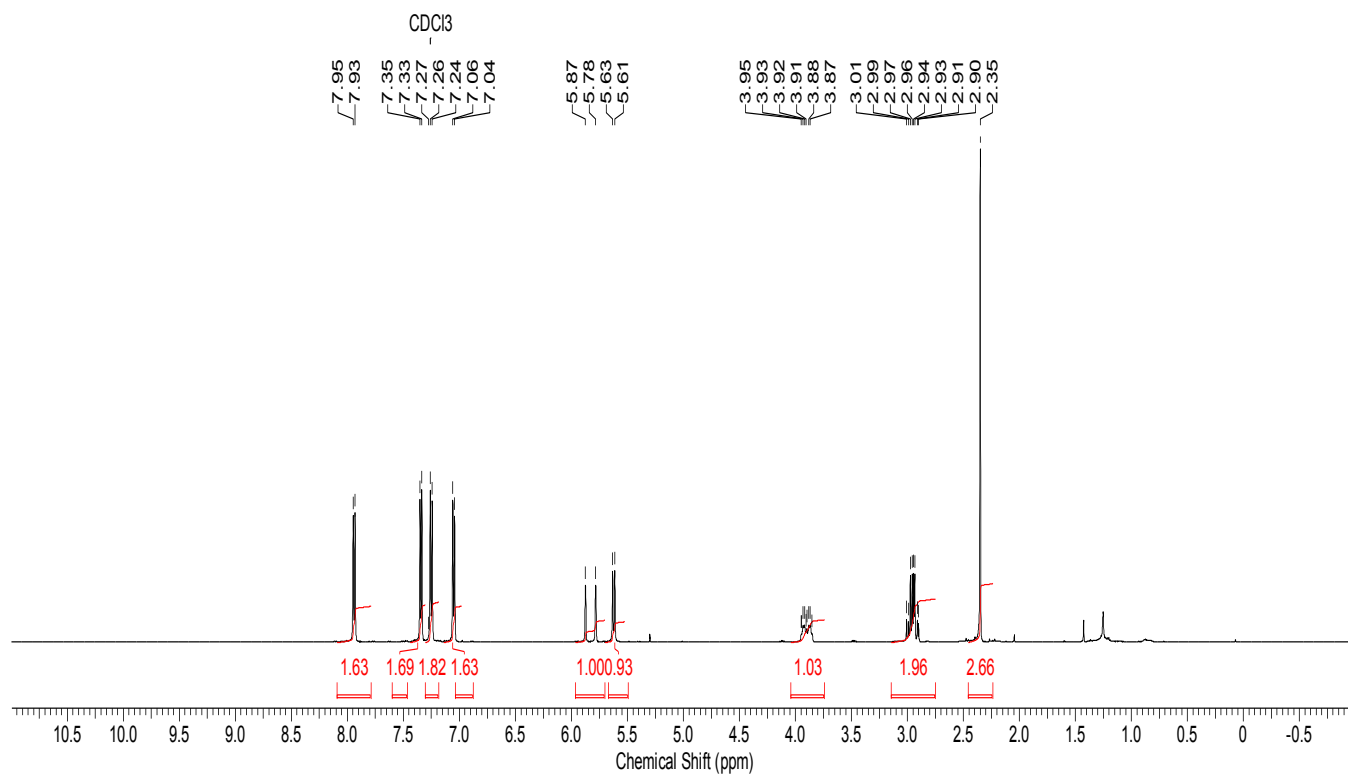

**<sup>13</sup>C NMR**  
**125.7 MHz**  
**CDCl<sub>3</sub>**

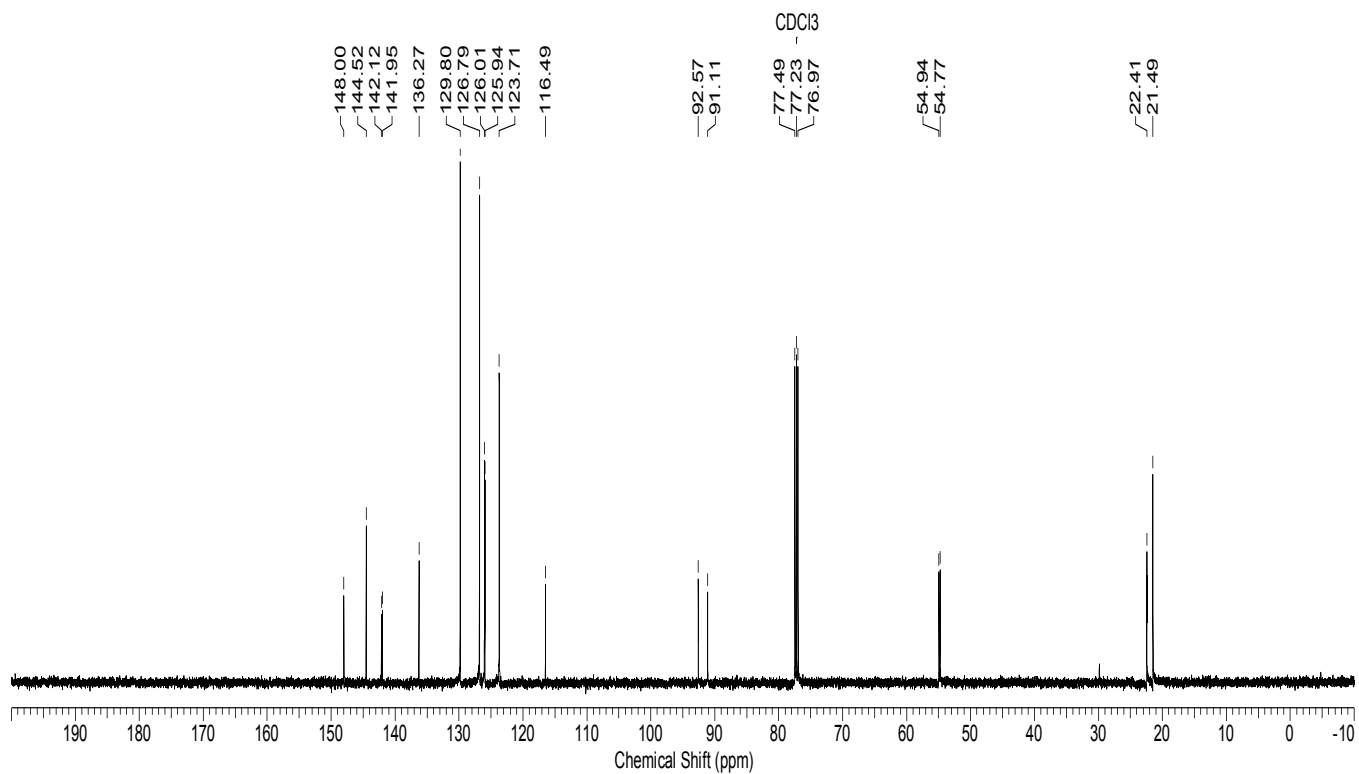

**$^{19}\text{F}$  NMR**  
**470.4 MHz**  
 **$\text{CDCl}_3$**

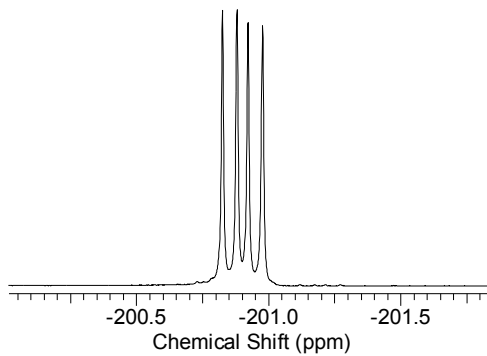

**<sup>1</sup>H NMR**  
**500 MHz**  
**CDCl<sub>3</sub>**

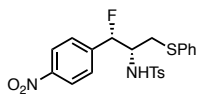

**4f**

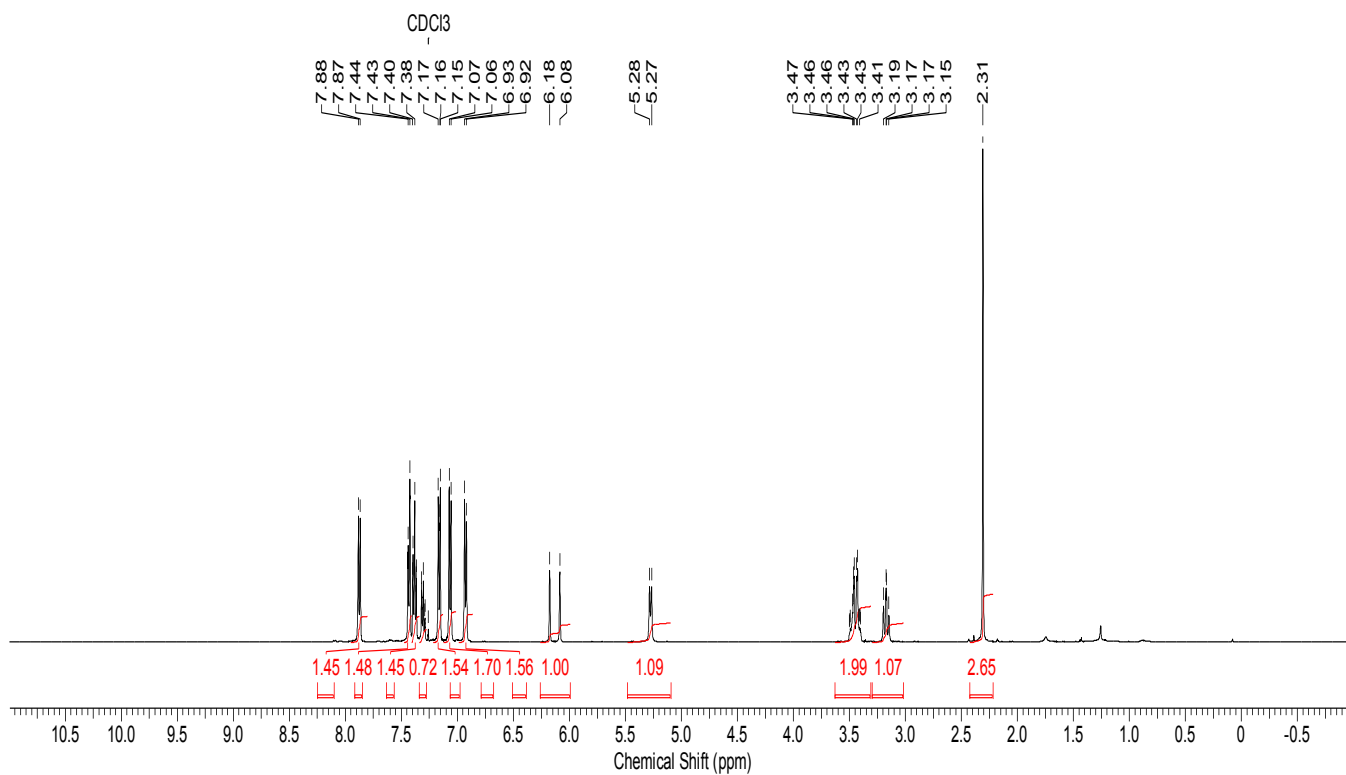

**<sup>13</sup>C NMR**  
**125.7 MHz**  
**CDCl<sub>3</sub>**

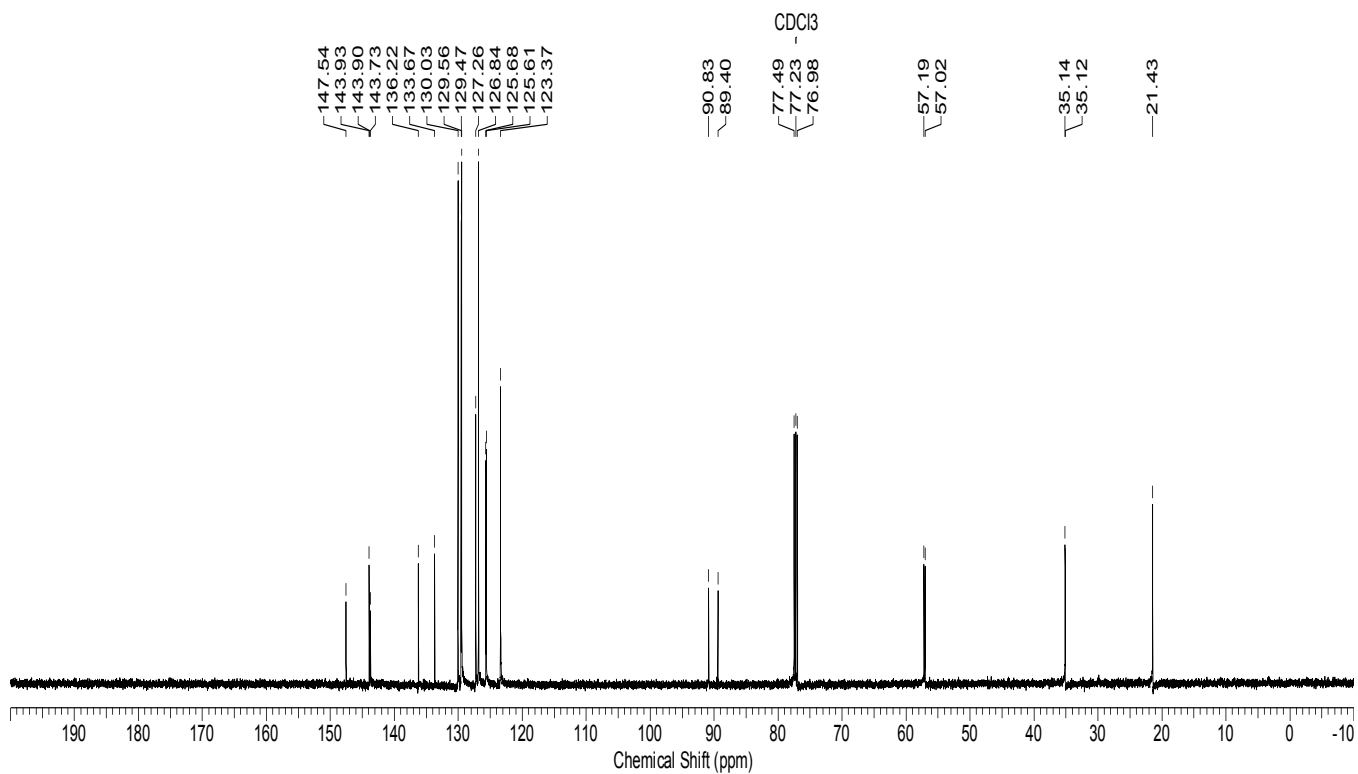

**$^{19}\text{F}$  NMR**  
**470.4 MHz**  
 **$\text{CDCl}_3$**

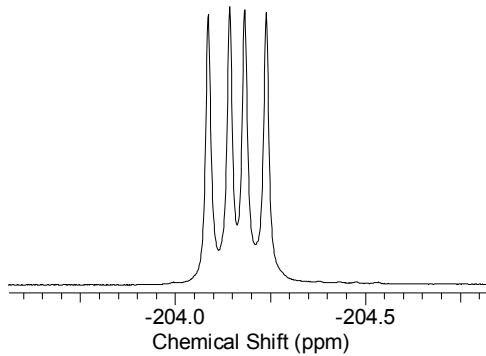



**<sup>1</sup>H NMR**  
**500 MHz**  
**CDCl<sub>3</sub>**

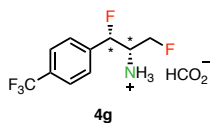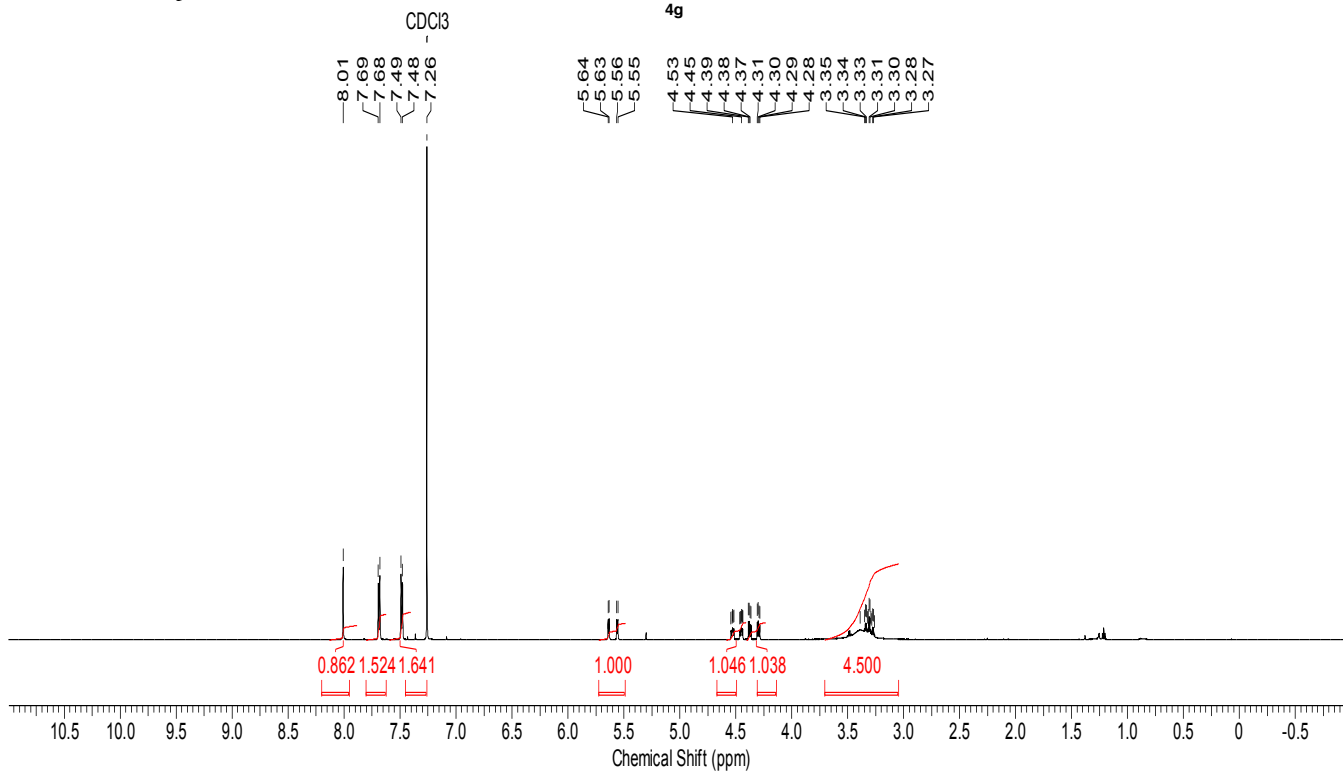

**<sup>13</sup>C NMR**  
**125.7 MHz**  
**CDCl<sub>3</sub>**

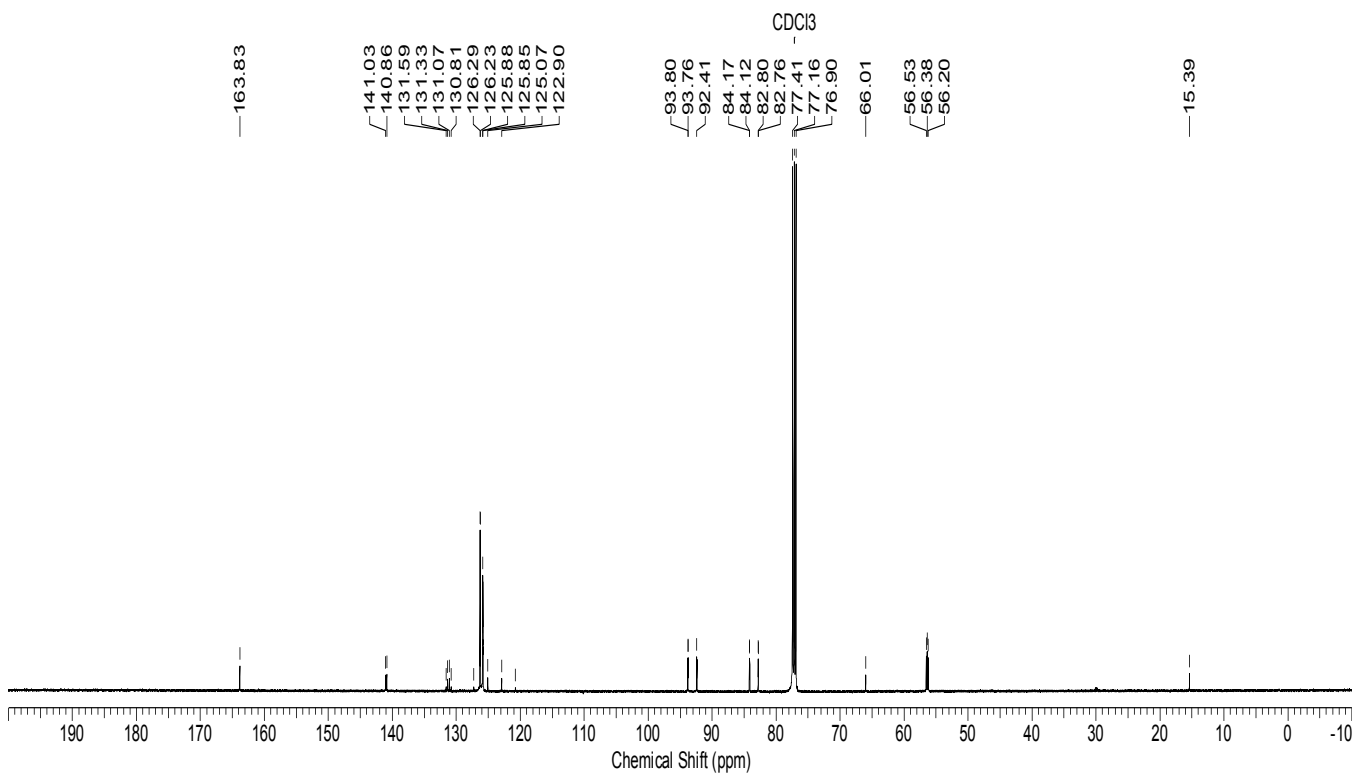

**$^{19}\text{F}$  NMR**  
**470.4 MHz**  
 **$\text{CDCl}_3$**

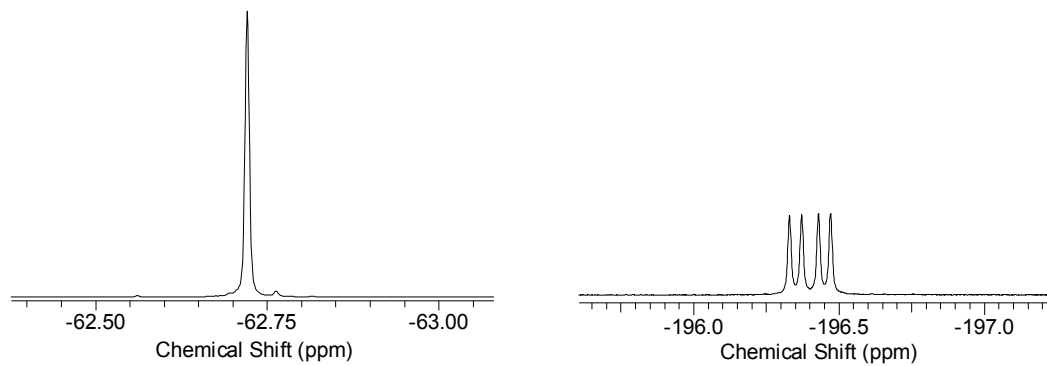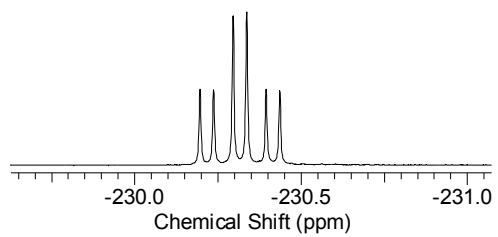

**<sup>1</sup>H NMR**  
**500 MHz**  
**CDCl<sub>3</sub>**

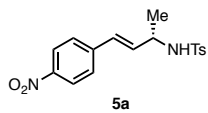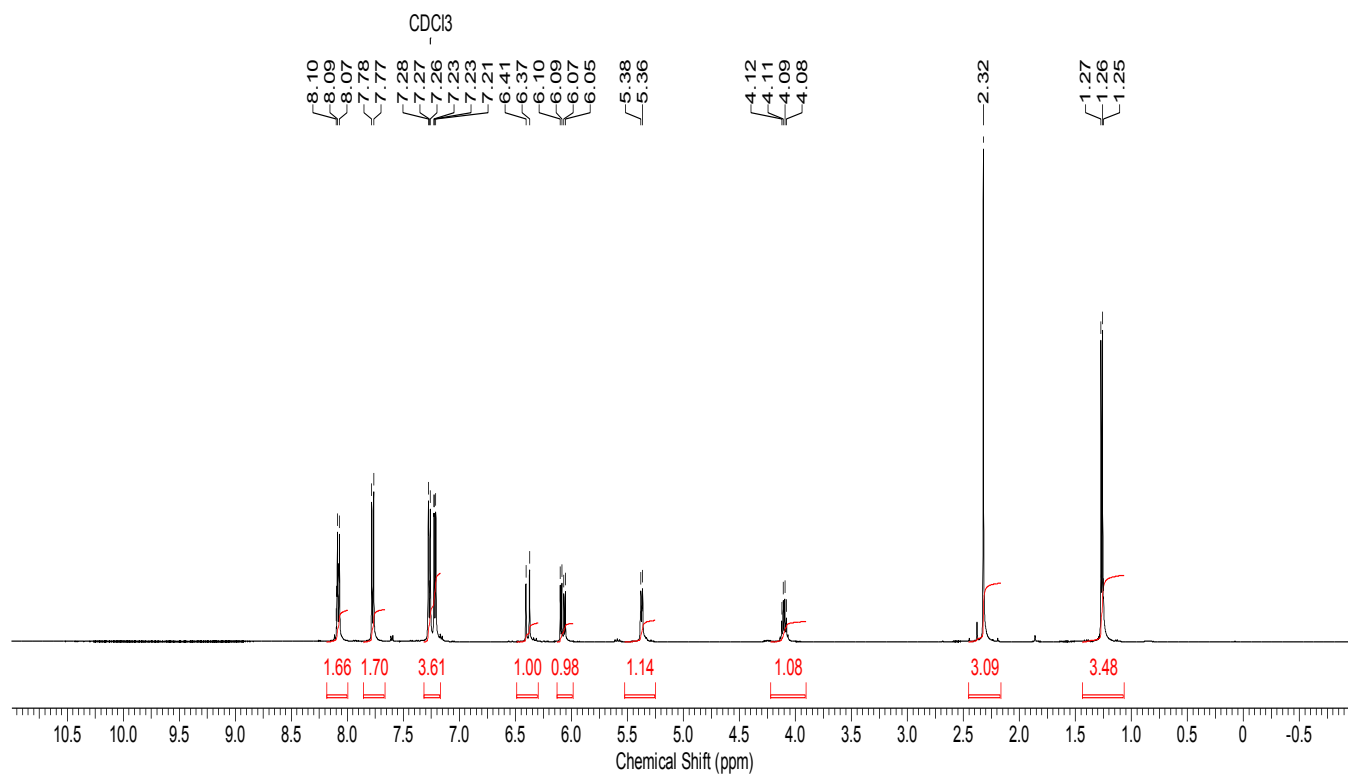

**<sup>13</sup>C NMR**  
**125.7 MHz**  
**CDCl<sub>3</sub>**

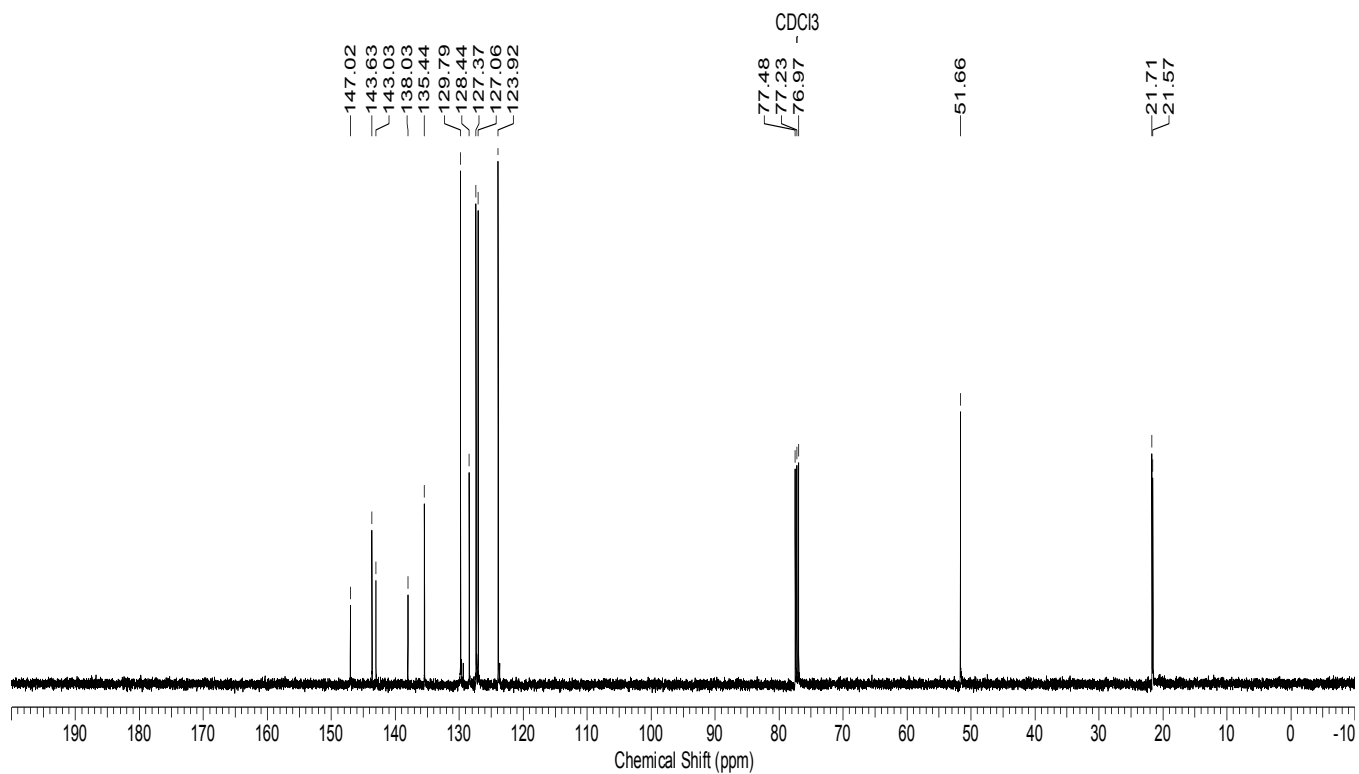

**<sup>1</sup>H NMR**  
**500 MHz**  
**CDCl<sub>3</sub>**

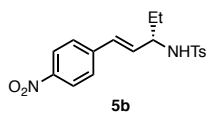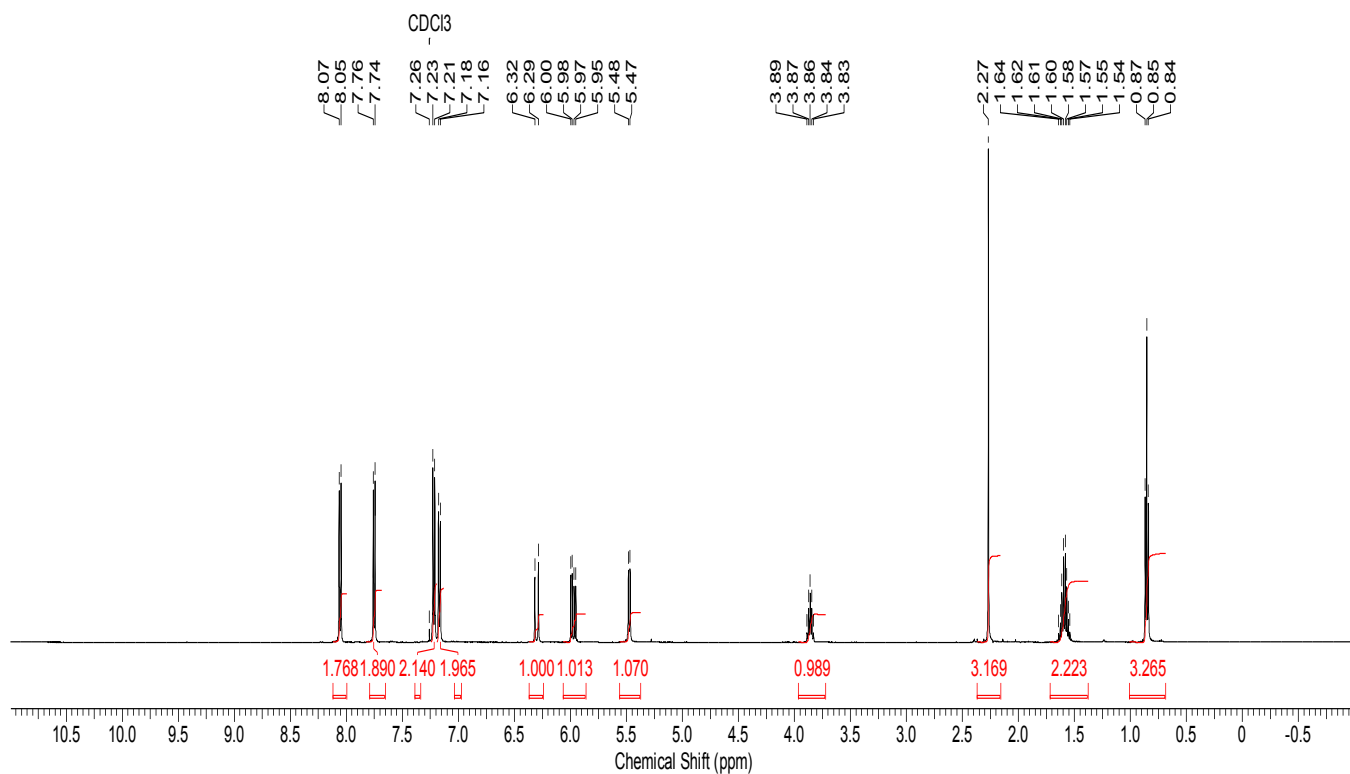

**<sup>13</sup>C NMR**  
**125.7 MHz**  
**CDCl<sub>3</sub>**

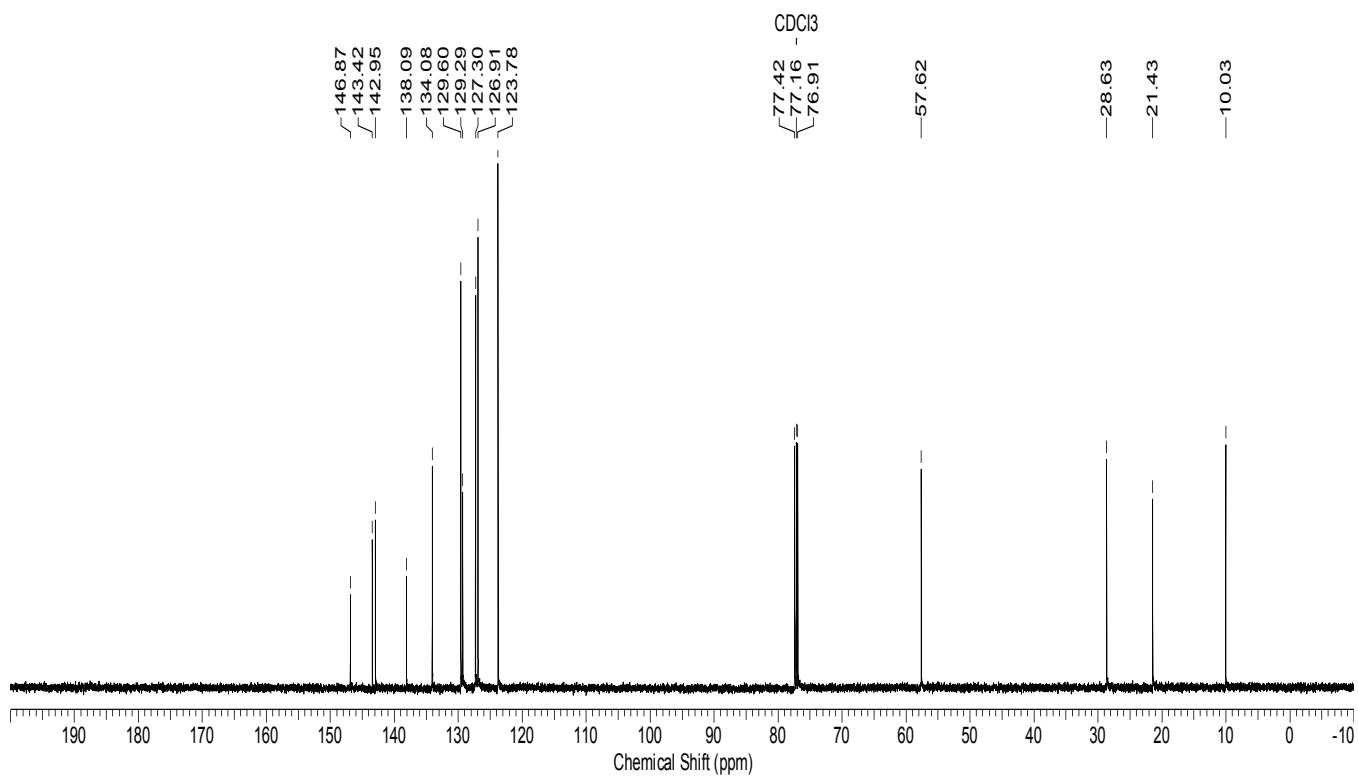

**<sup>1</sup>H NMR**  
**500 MHz**  
**CDCl<sub>3</sub>**

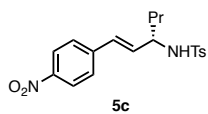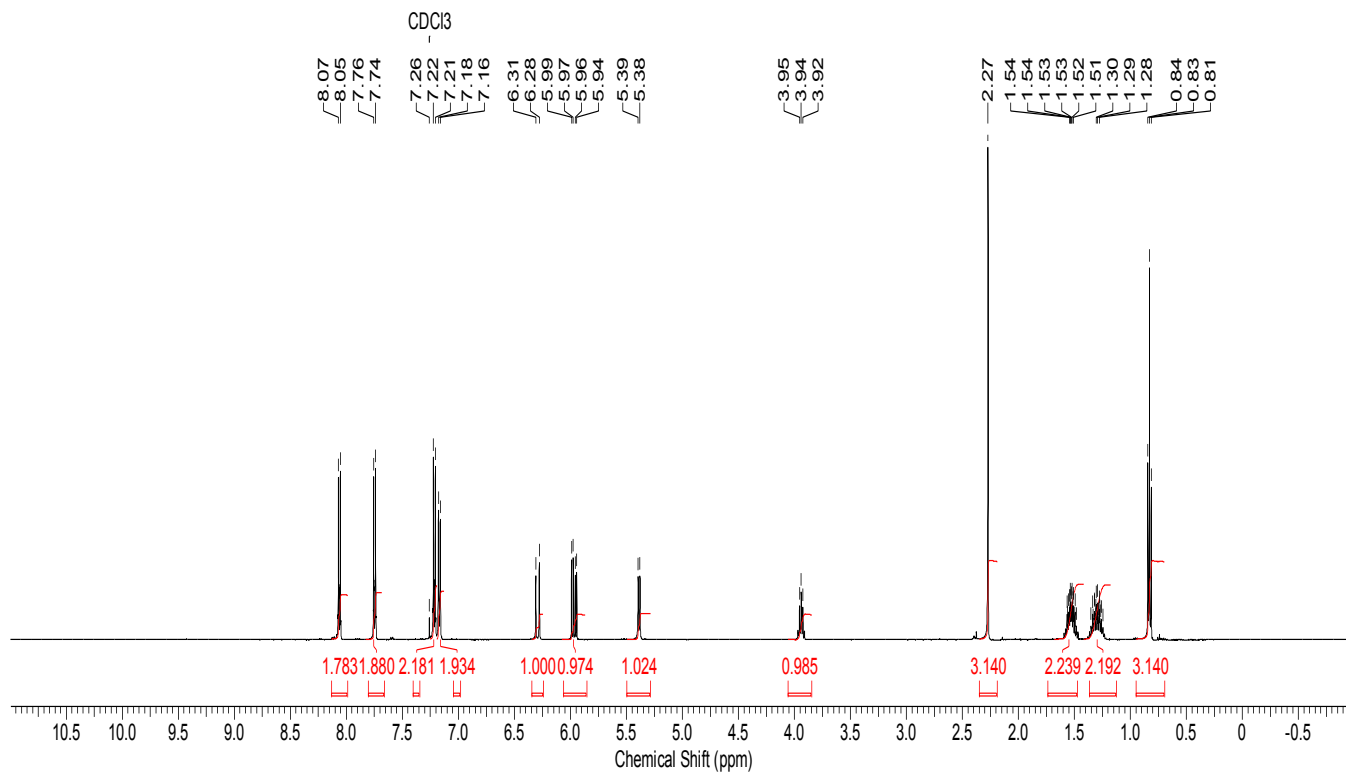

**<sup>13</sup>C NMR**  
**125.7 MHz**  
**CDCl<sub>3</sub>**

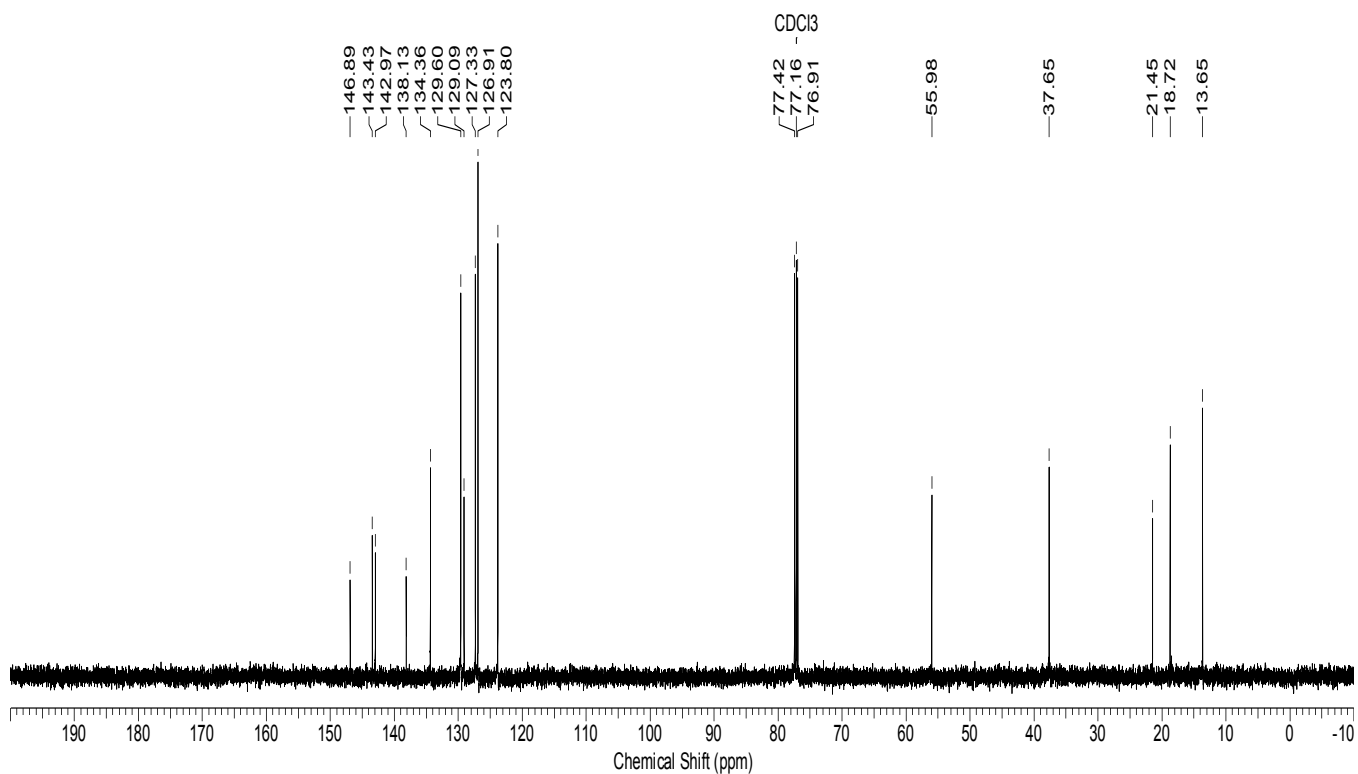

**<sup>1</sup>H NMR**  
**500 MHz**  
**CDCl<sub>3</sub>**

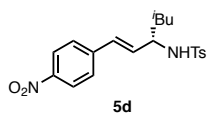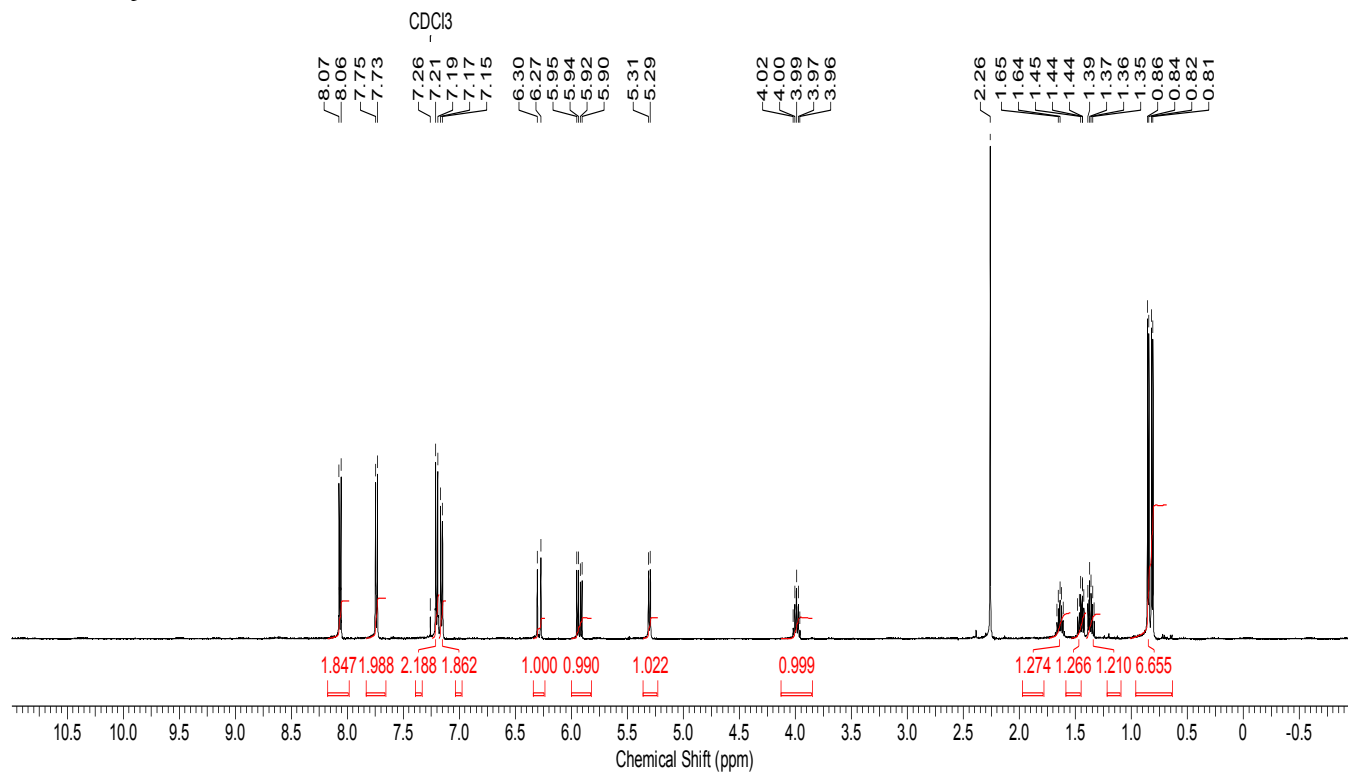

**<sup>13</sup>C NMR**  
**125.7 MHz**  
**CDCl<sub>3</sub>**

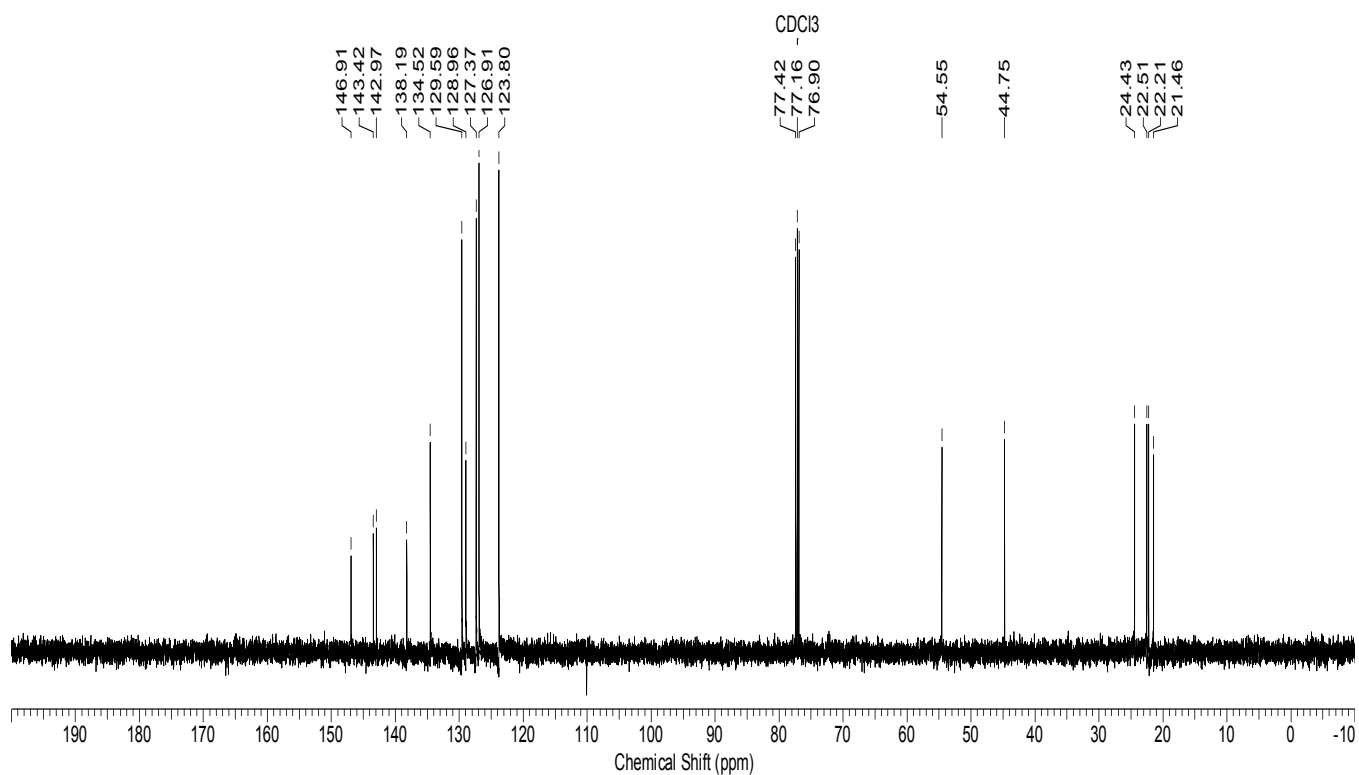

**<sup>1</sup>H NMR**  
**500 MHz**  
**CDCl<sub>3</sub>**

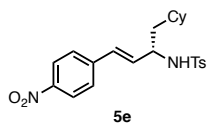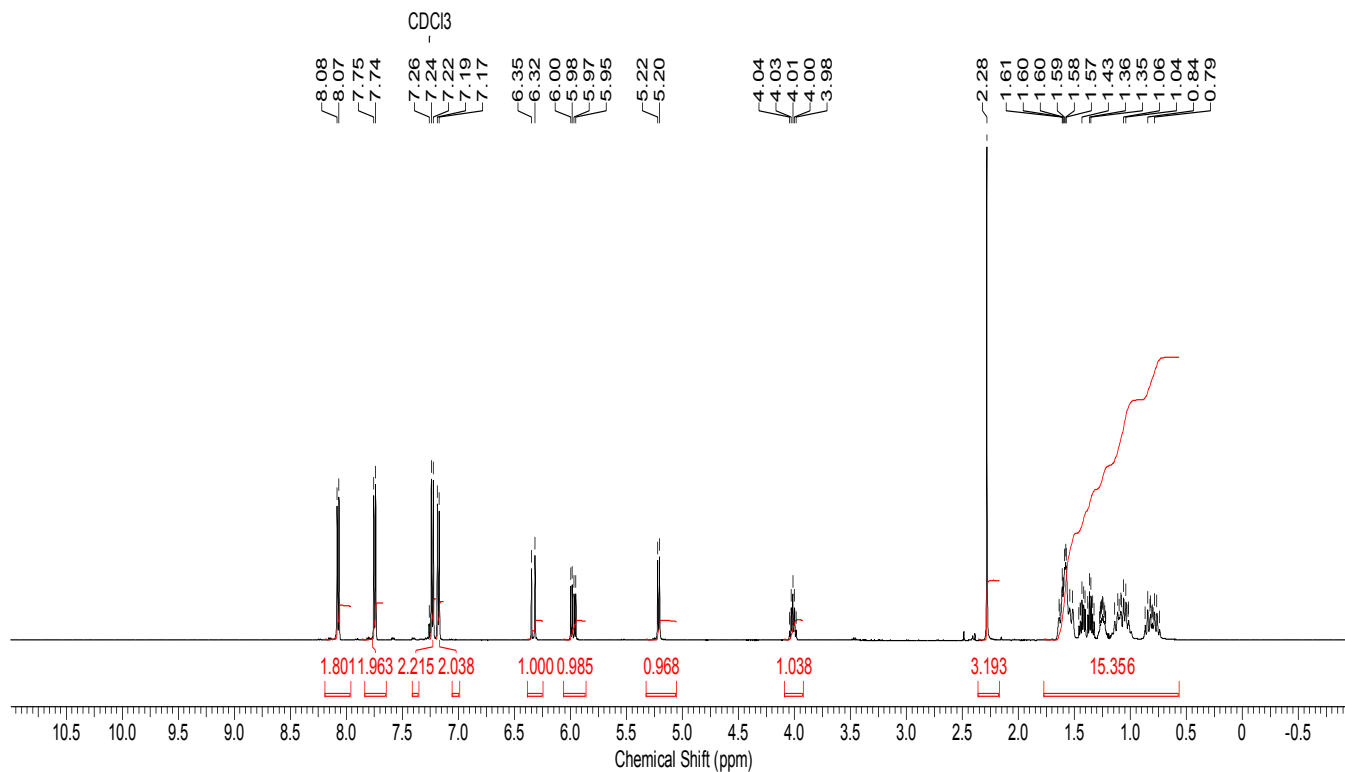

**<sup>13</sup>C NMR**  
**125.7 MHz**  
**CDCl<sub>3</sub>**

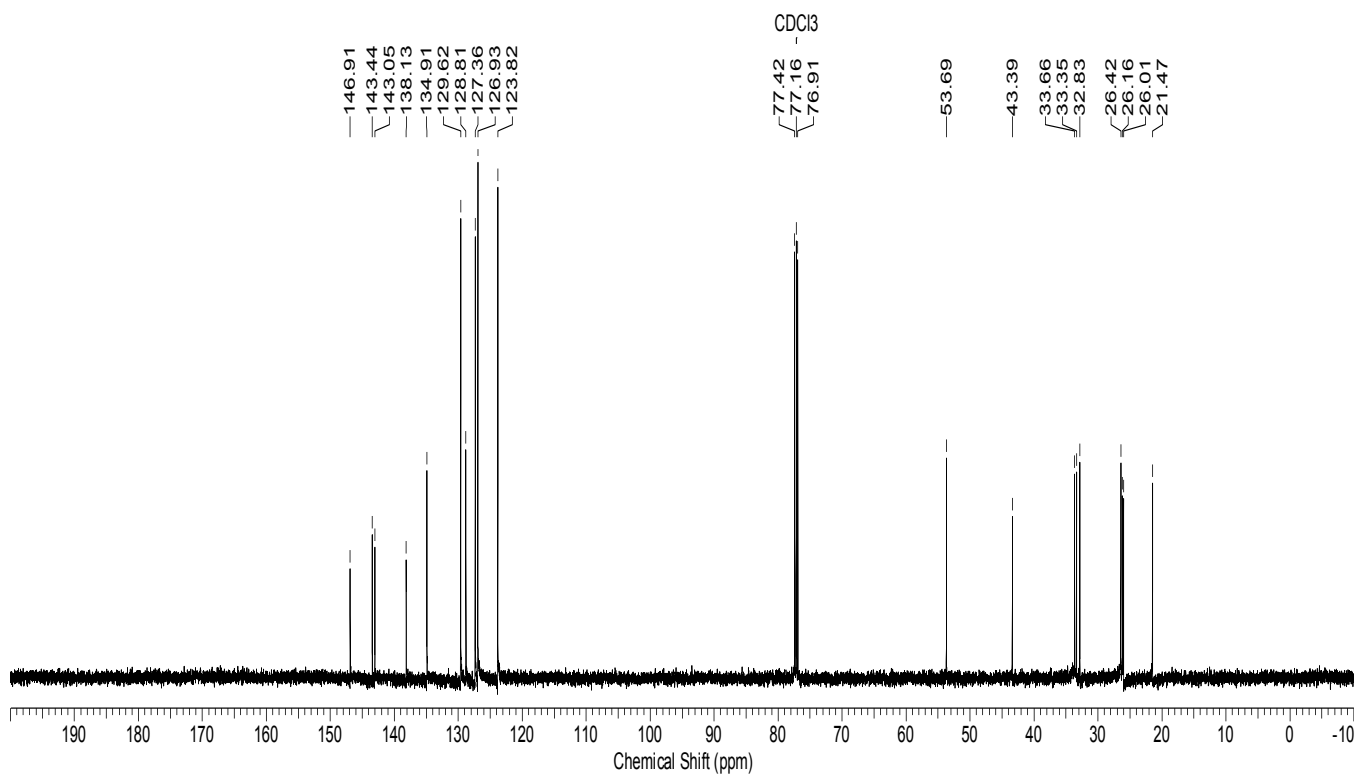

**<sup>1</sup>H NMR**  
**500 MHz**  
**CDCl<sub>3</sub>**

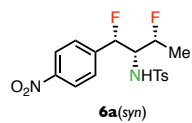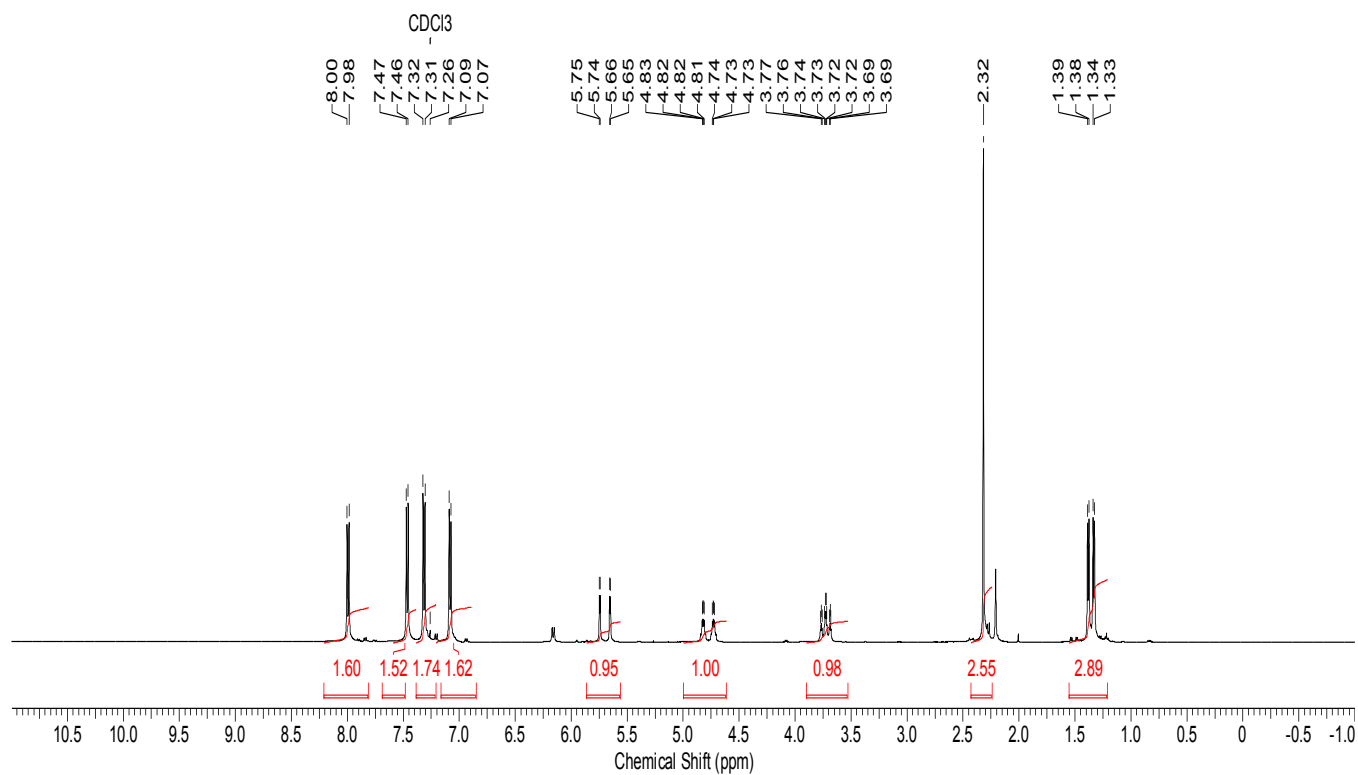

**<sup>13</sup>C NMR**  
**125.7 MHz**  
**CDCl<sub>3</sub>**

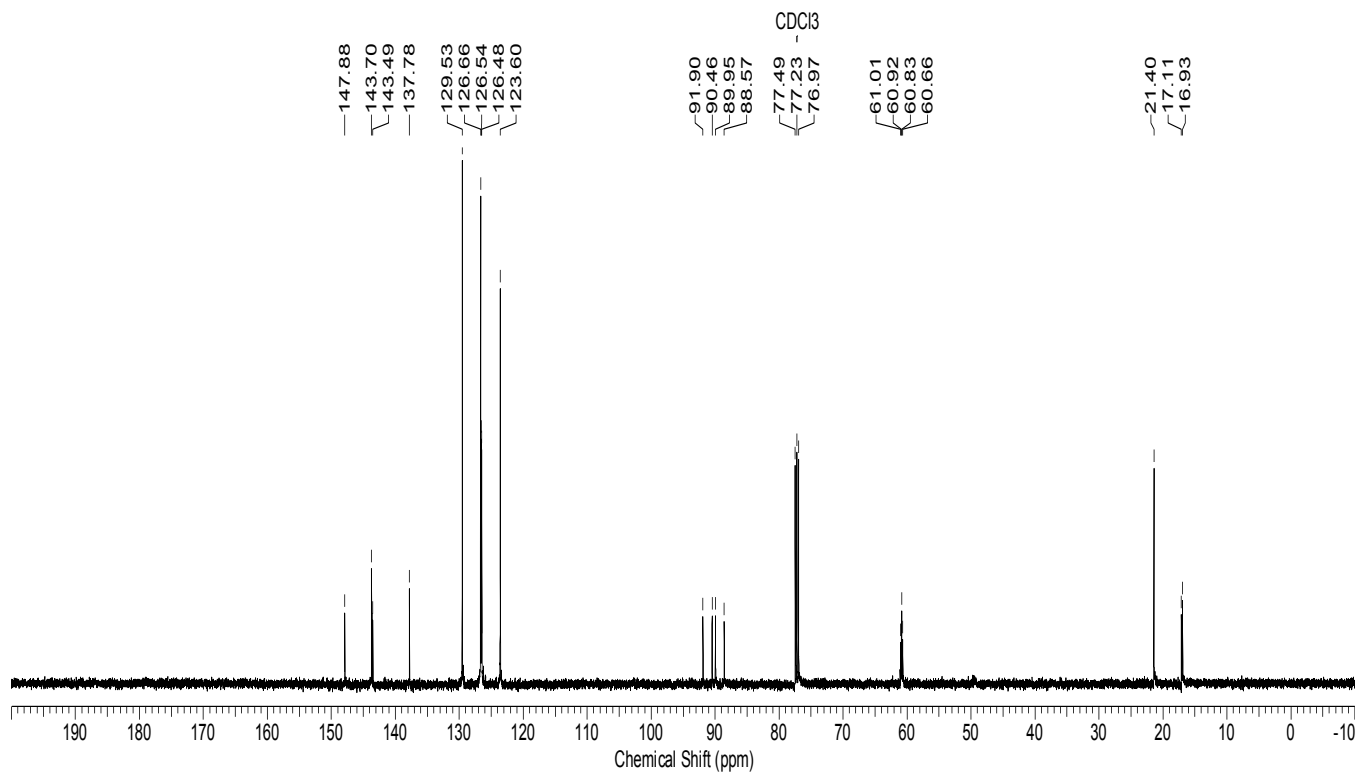



**$^{19}\text{F}$  NMR**  
**470.4 MHz**  
 **$\text{CDCl}_3$**

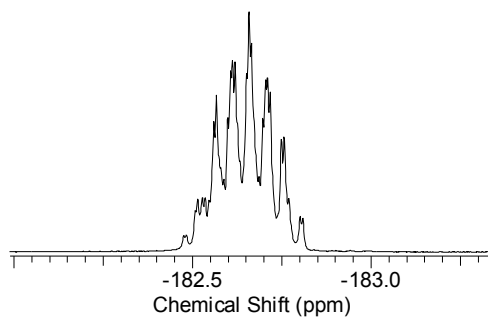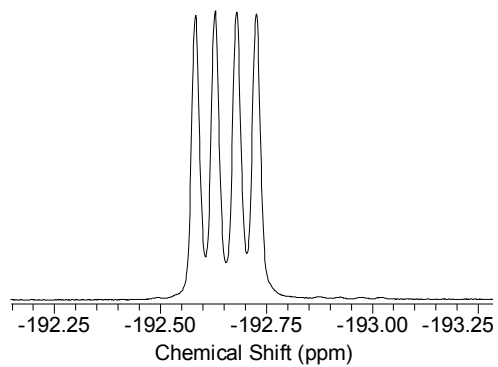

**<sup>1</sup>H NMR**  
**500 MHz**  
**CDCl<sub>3</sub>**

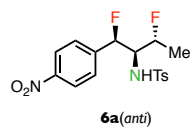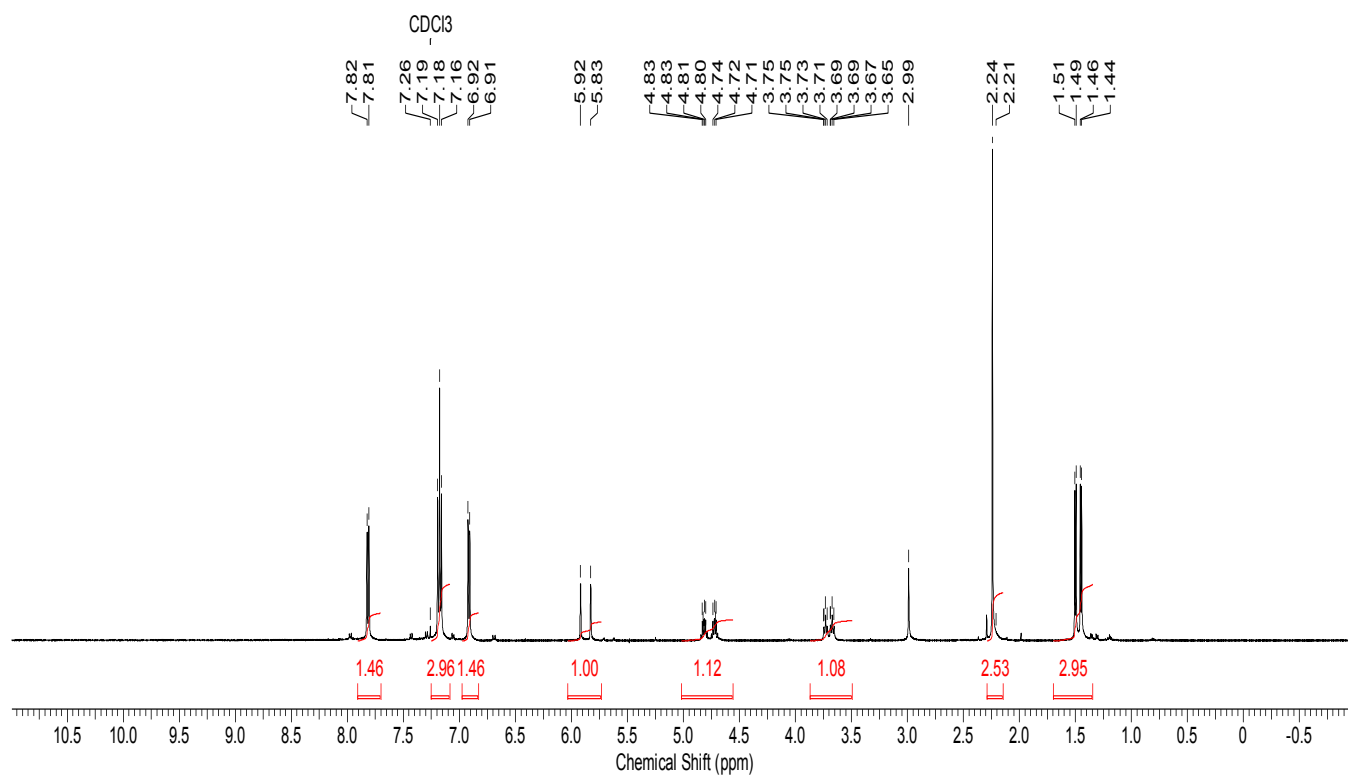

**<sup>13</sup>C NMR**  
**125.7 MHz**  
**CDCl<sub>3</sub>**

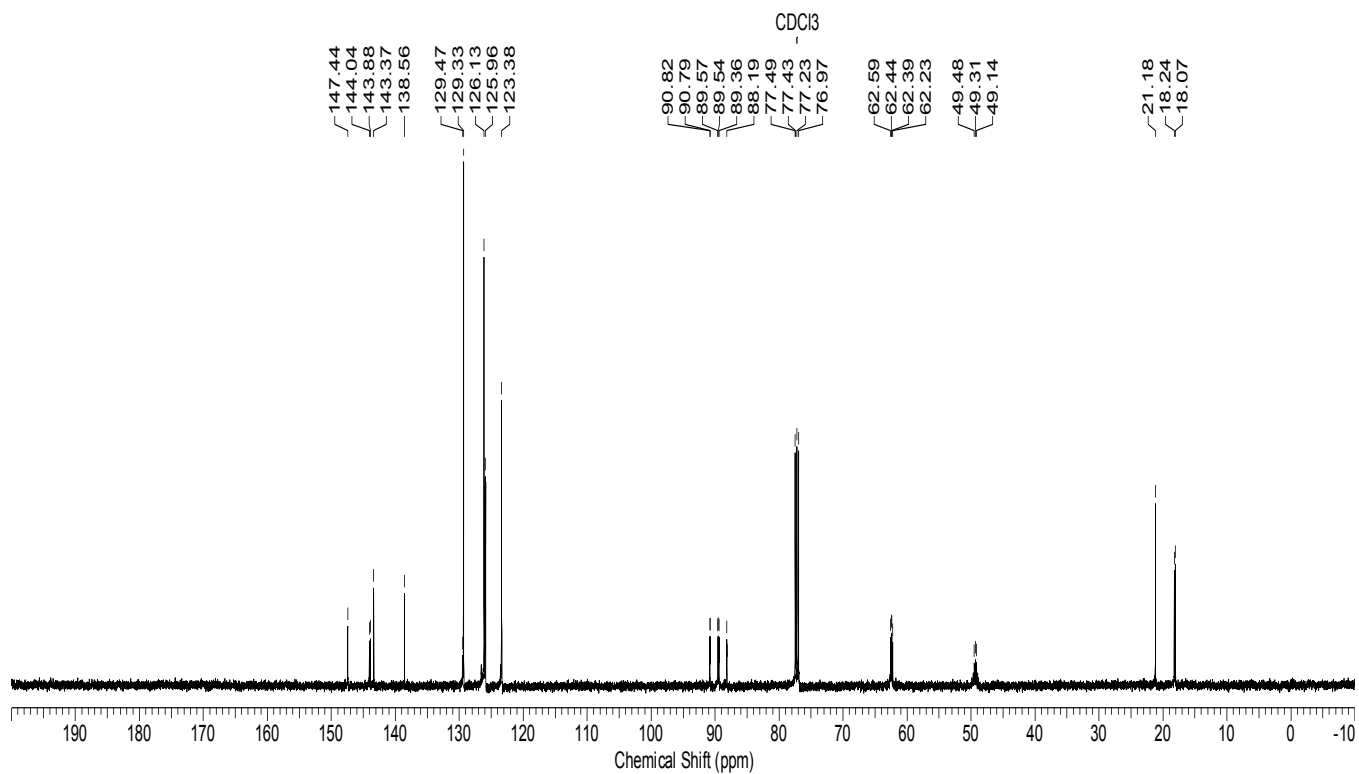

**$^{19}\text{F}$  NMR**  
**470.4 MHz**  
 **$\text{CDCl}_3$**

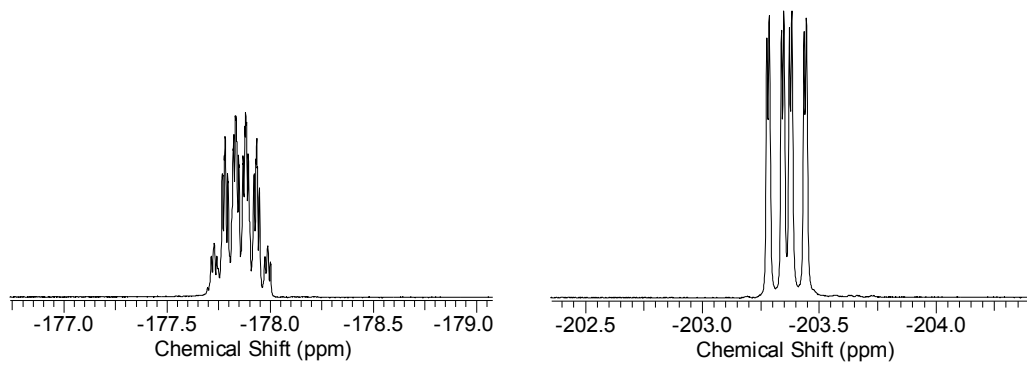

**<sup>1</sup>H NMR**  
**500 MHz**  
**10% CD<sub>3</sub>OD/CDCl<sub>3</sub>**

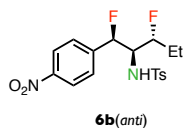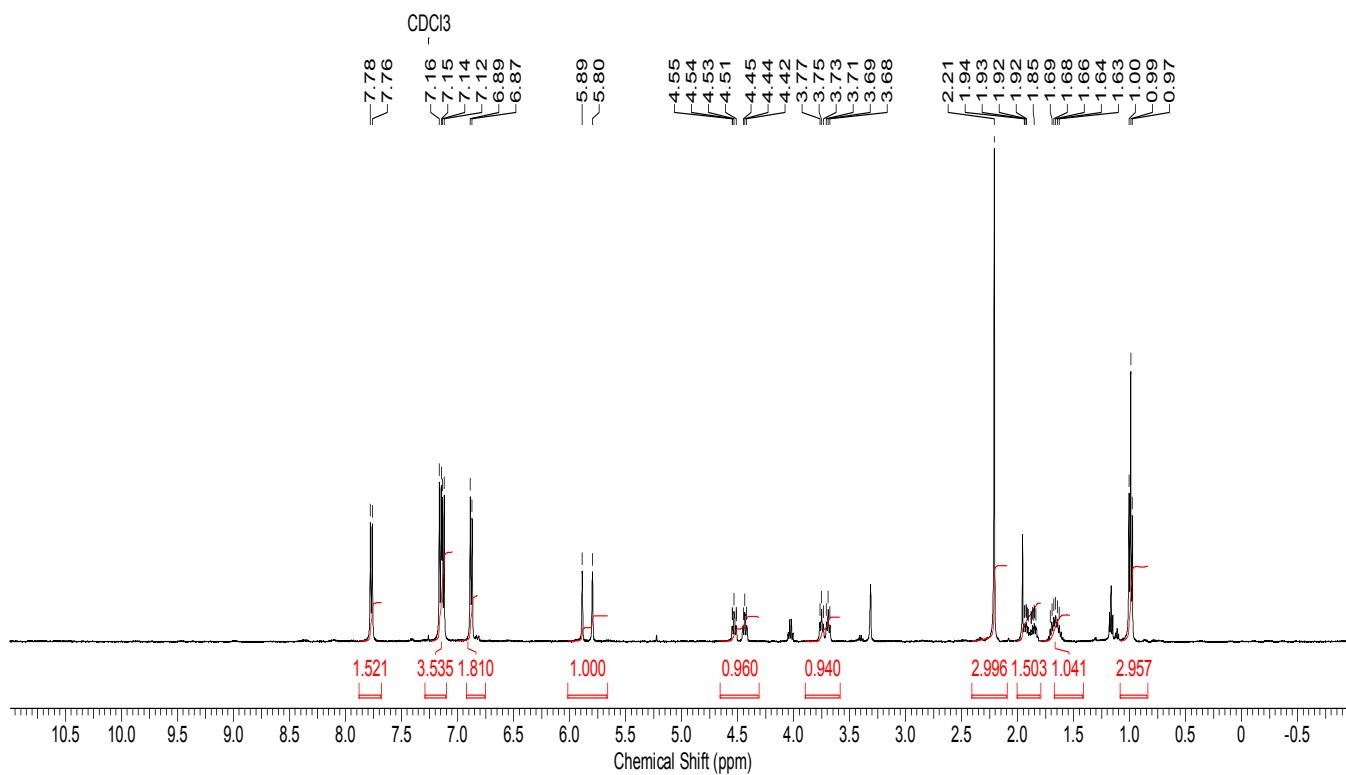

**<sup>13</sup>C NMR**  
**125.7 MHz**  
**10% CD<sub>3</sub>OD/CDCl<sub>3</sub>**

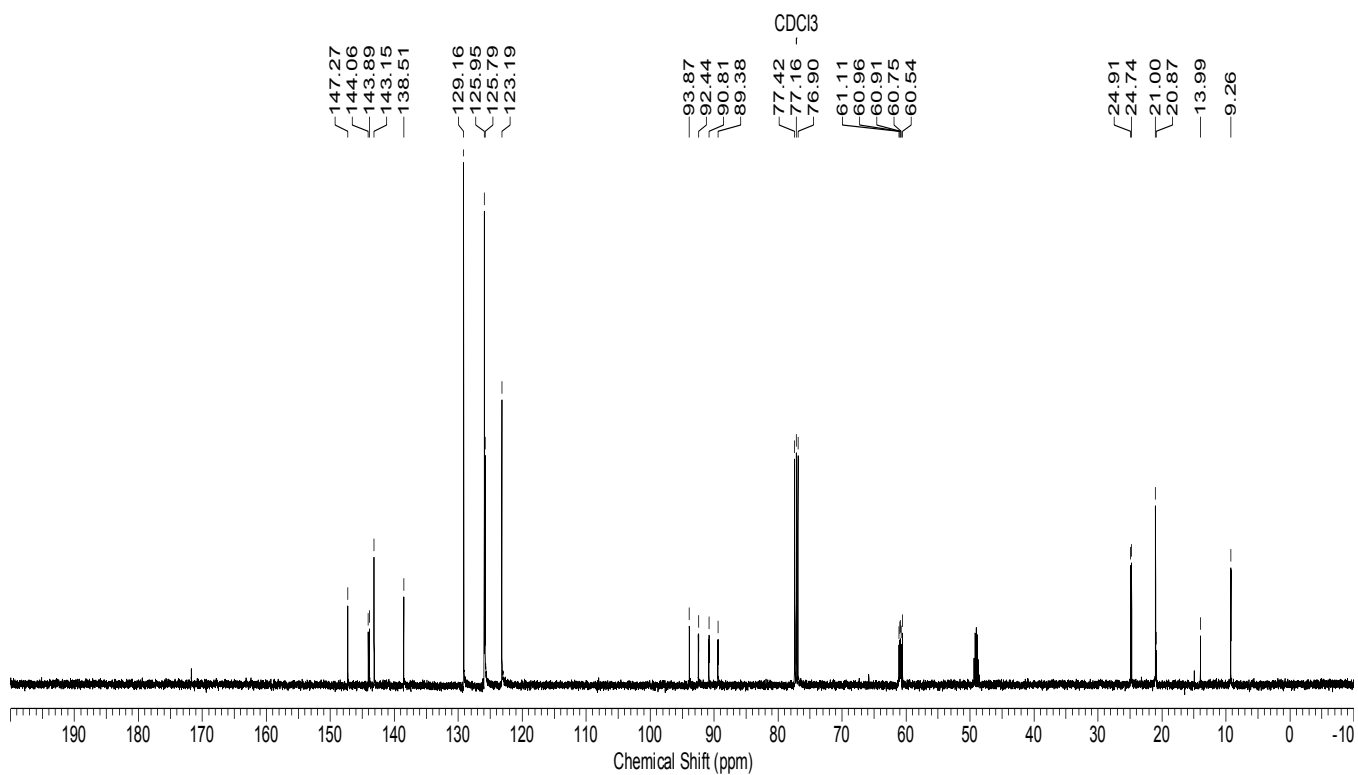

**$^{19}\text{F}$  NMR**  
**470.4 MHz**  
 **$\text{CDCl}_3$**

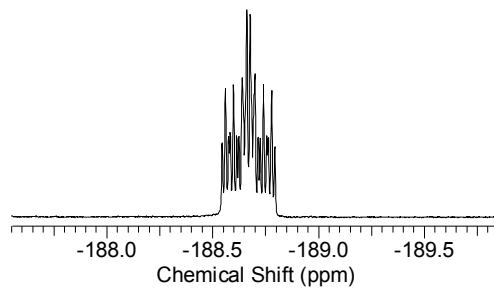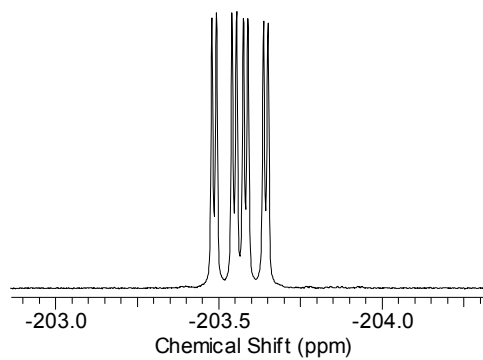

**<sup>1</sup>H NMR**  
**500 MHz**  
**10% CD<sub>3</sub>OD/CDCl<sub>3</sub>**

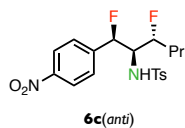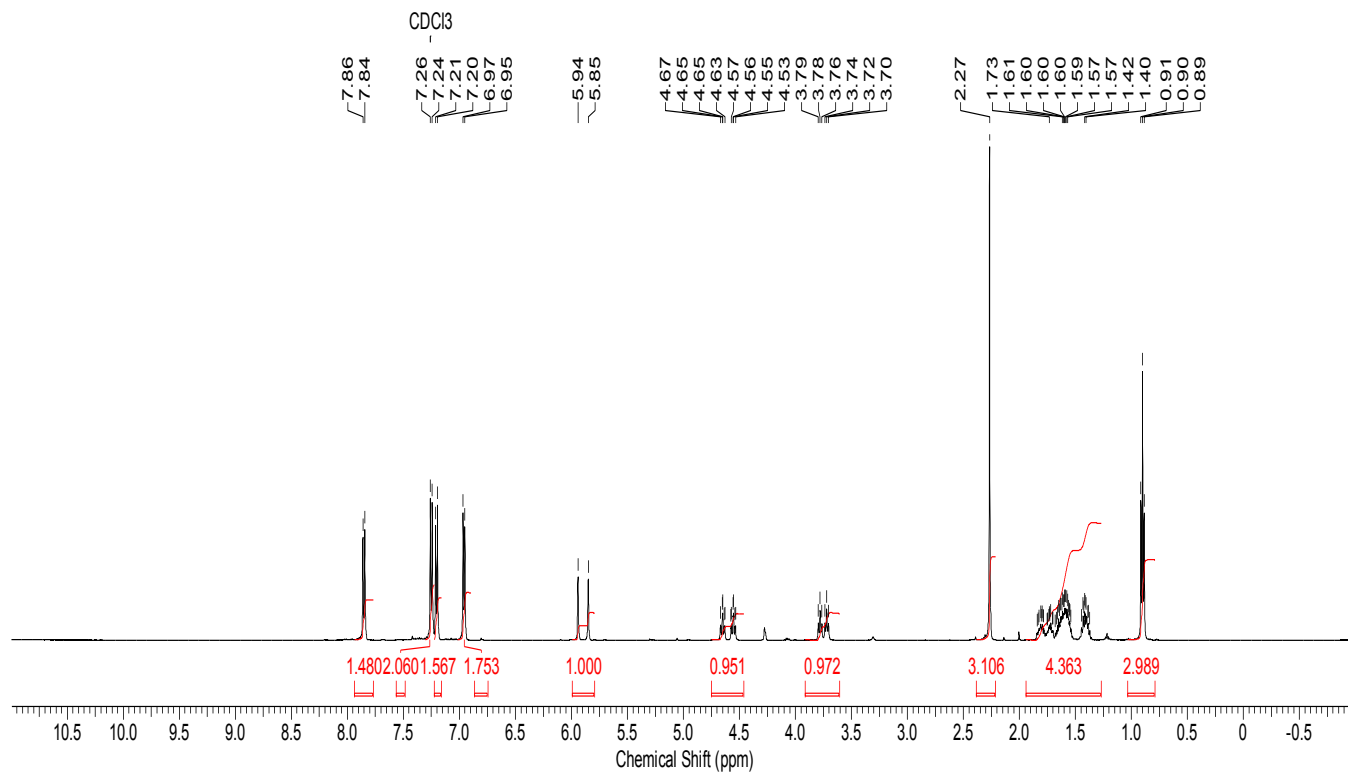

**<sup>13</sup>C NMR**  
**125.7 MHz**  
**10% CD<sub>3</sub>OD/CDCl<sub>3</sub>**

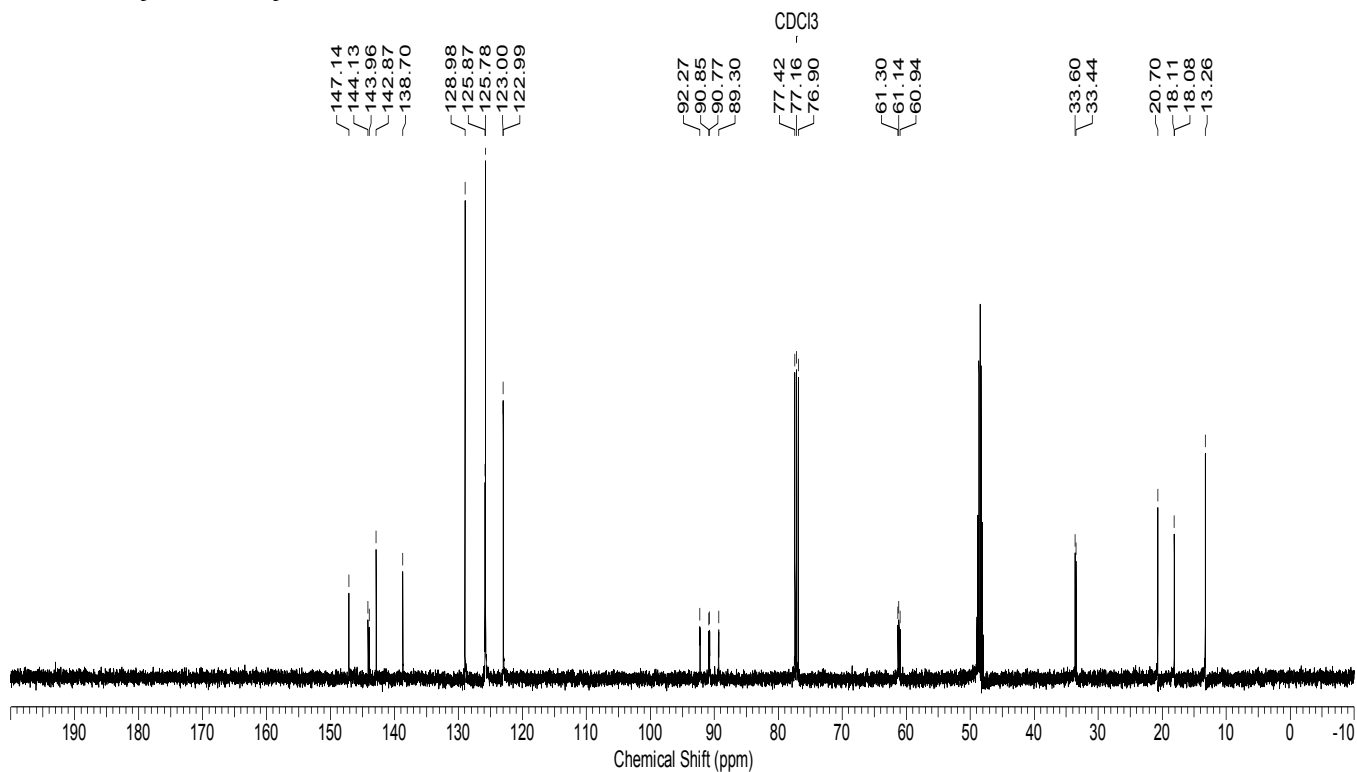

**$^{19}\text{F}$  NMR**  
**470.4 MHz**  
 **$\text{CDCl}_3$**

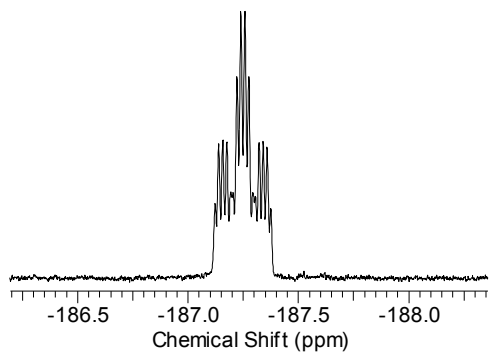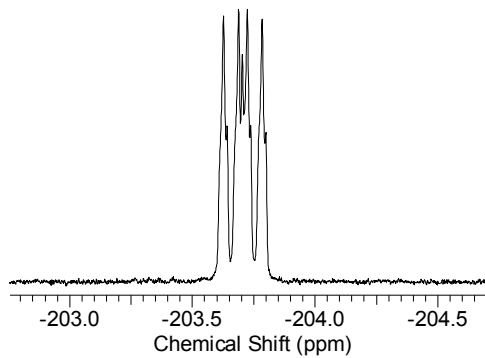





**$^{19}\text{F}$  NMR**  
**470.4 MHz**  
 **$\text{CDCl}_3$**

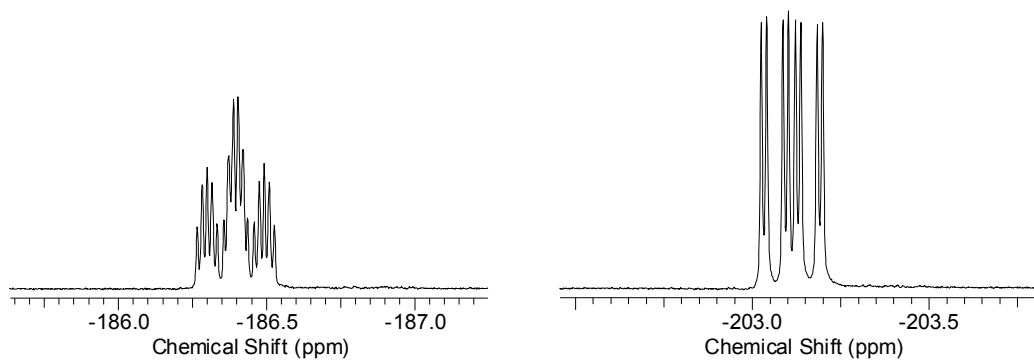

**<sup>1</sup>H NMR**  
**500 MHz**  
**10% CD<sub>3</sub>OD/CDCl<sub>3</sub>**

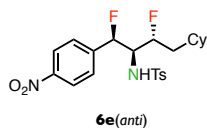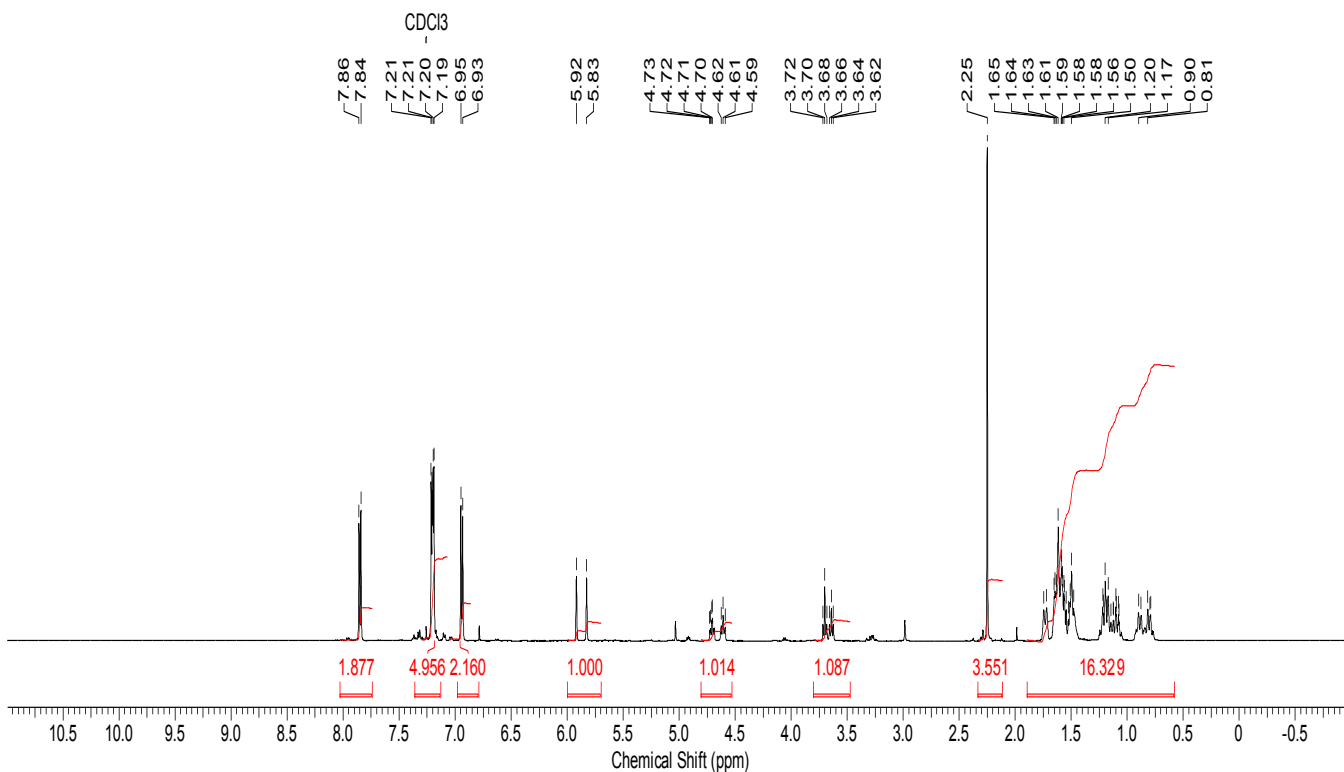

**<sup>13</sup>C NMR**  
**125.7 MHz**  
**10% CD<sub>3</sub>OD/CDCl<sub>3</sub>**

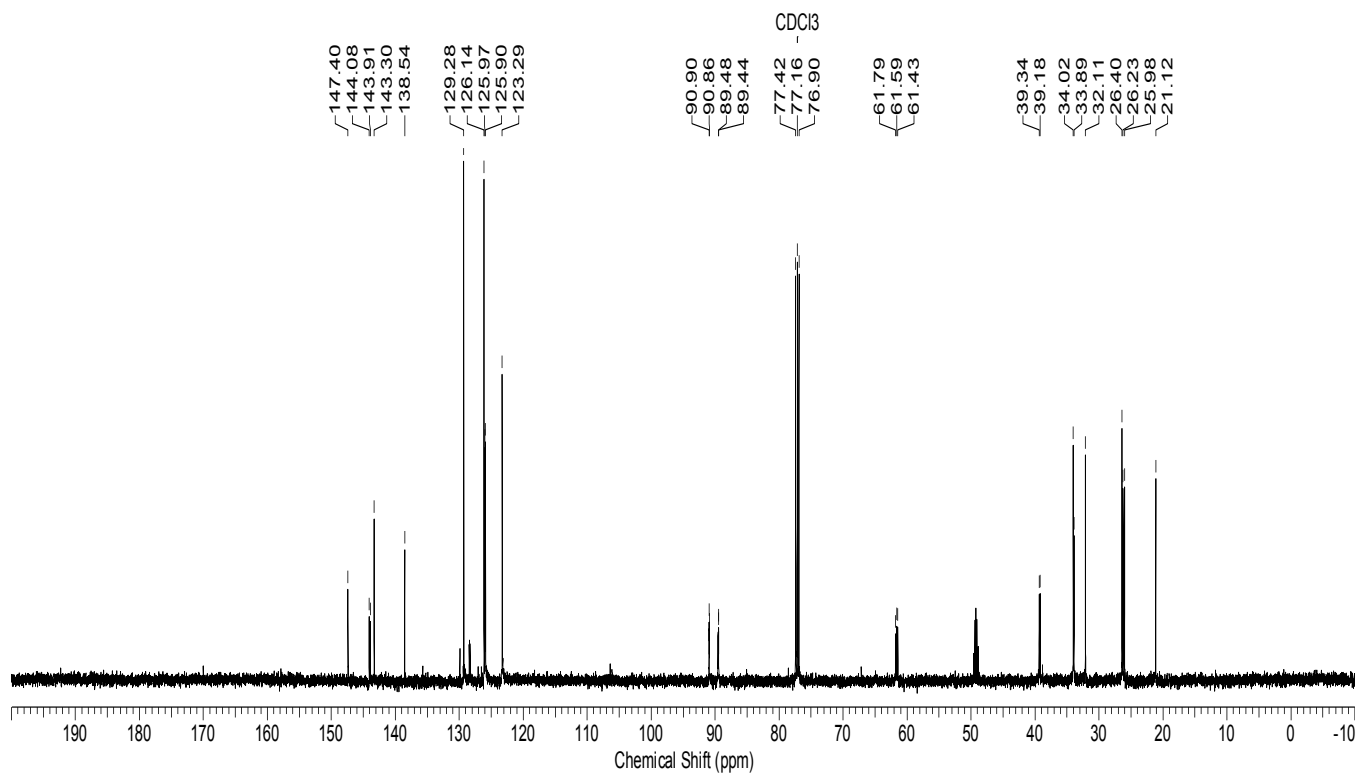

**$^{19}\text{F}$  NMR**  
**470.4 MHz**  
 **$\text{CDCl}_3$**

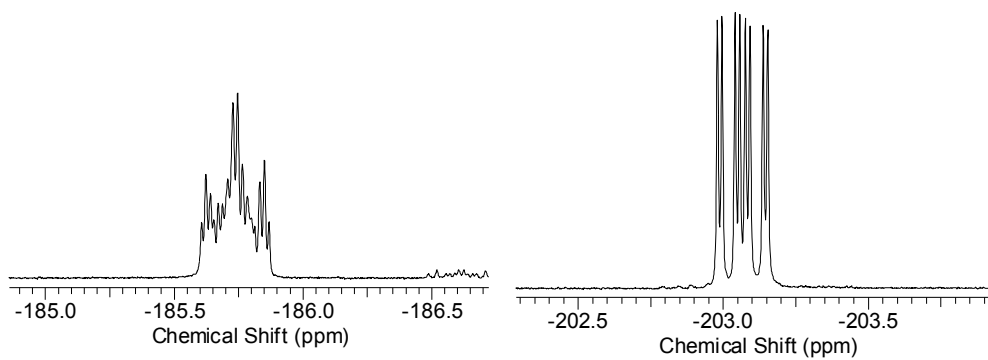

**<sup>1</sup>H NMR**  
**500 MHz**  
**CDCl<sub>3</sub>**

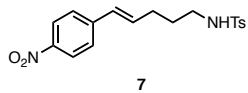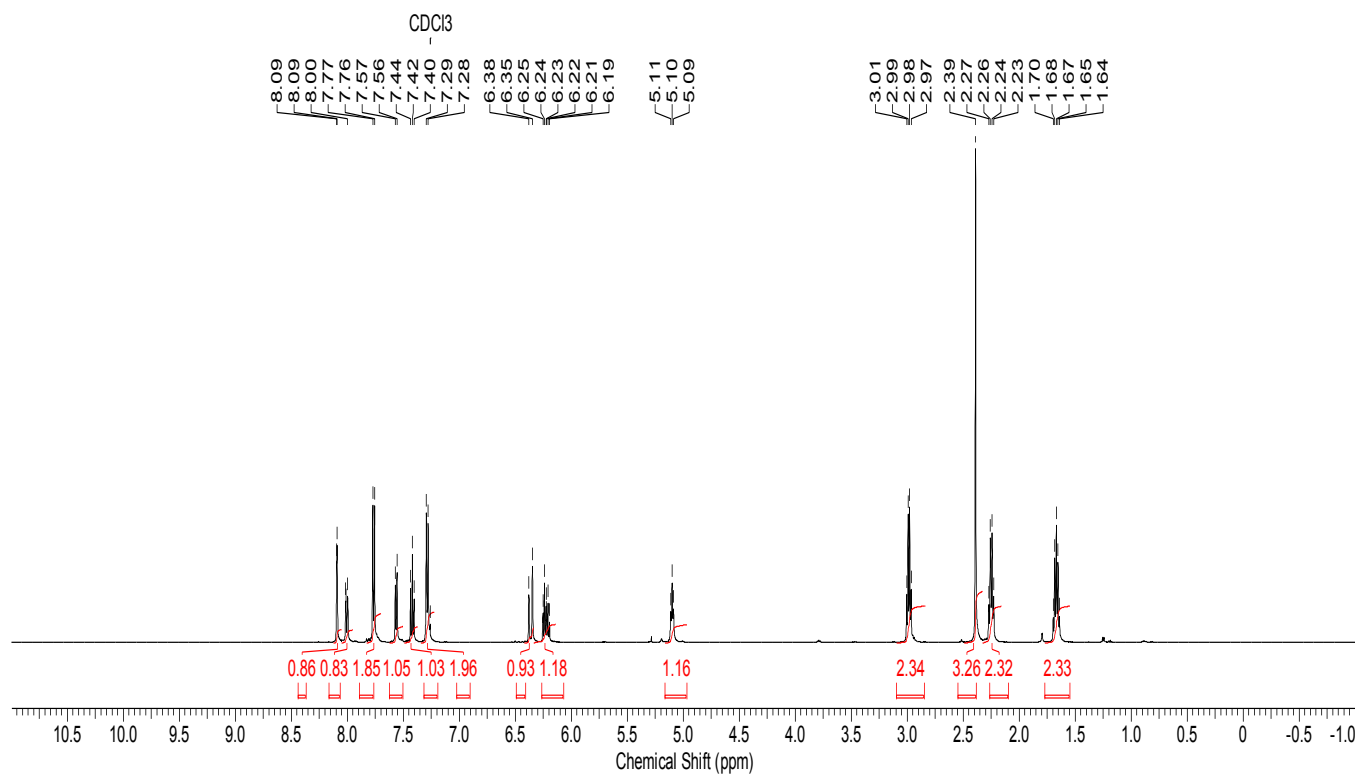

**<sup>13</sup>C NMR**  
**125.7 MHz**  
**CDCl<sub>3</sub>**

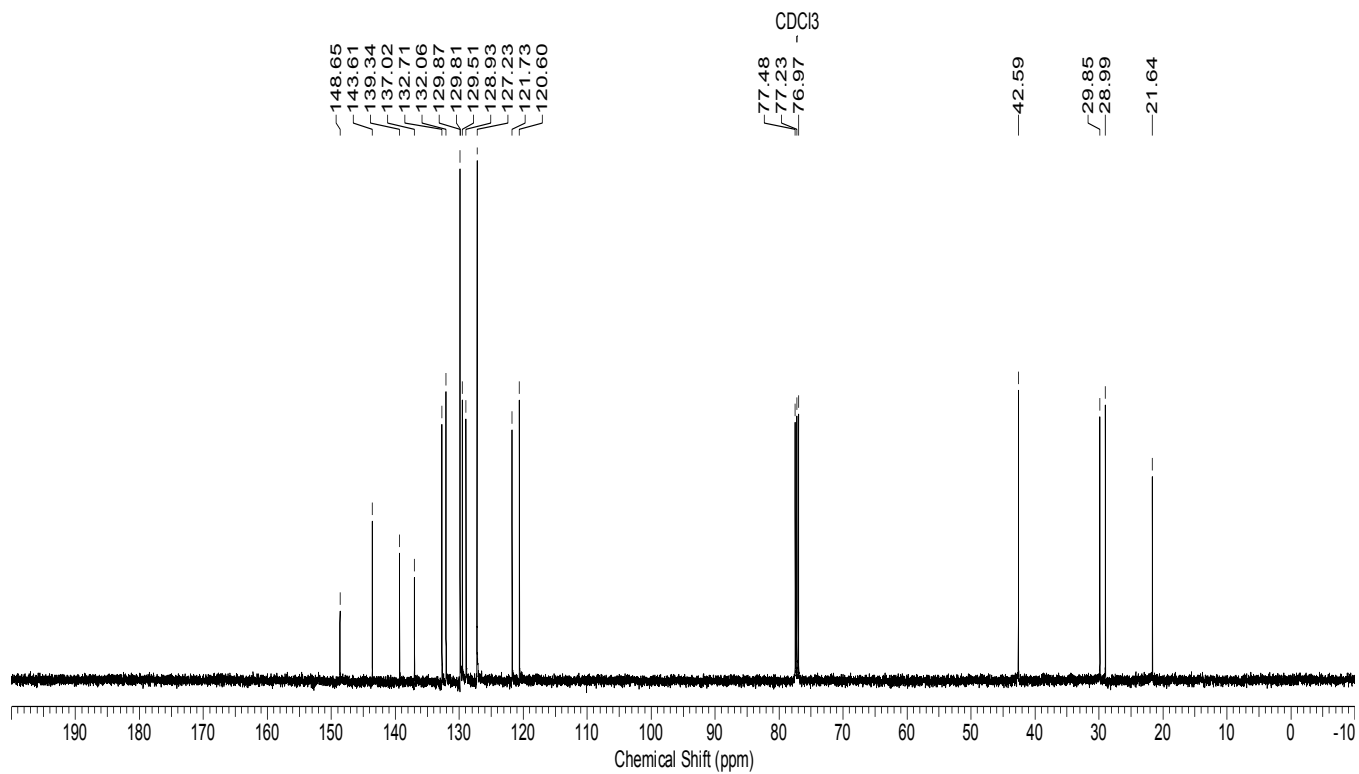

**<sup>1</sup>H NMR**  
**500 MHz**  
**CDCl<sub>3</sub>**

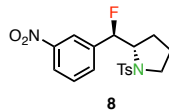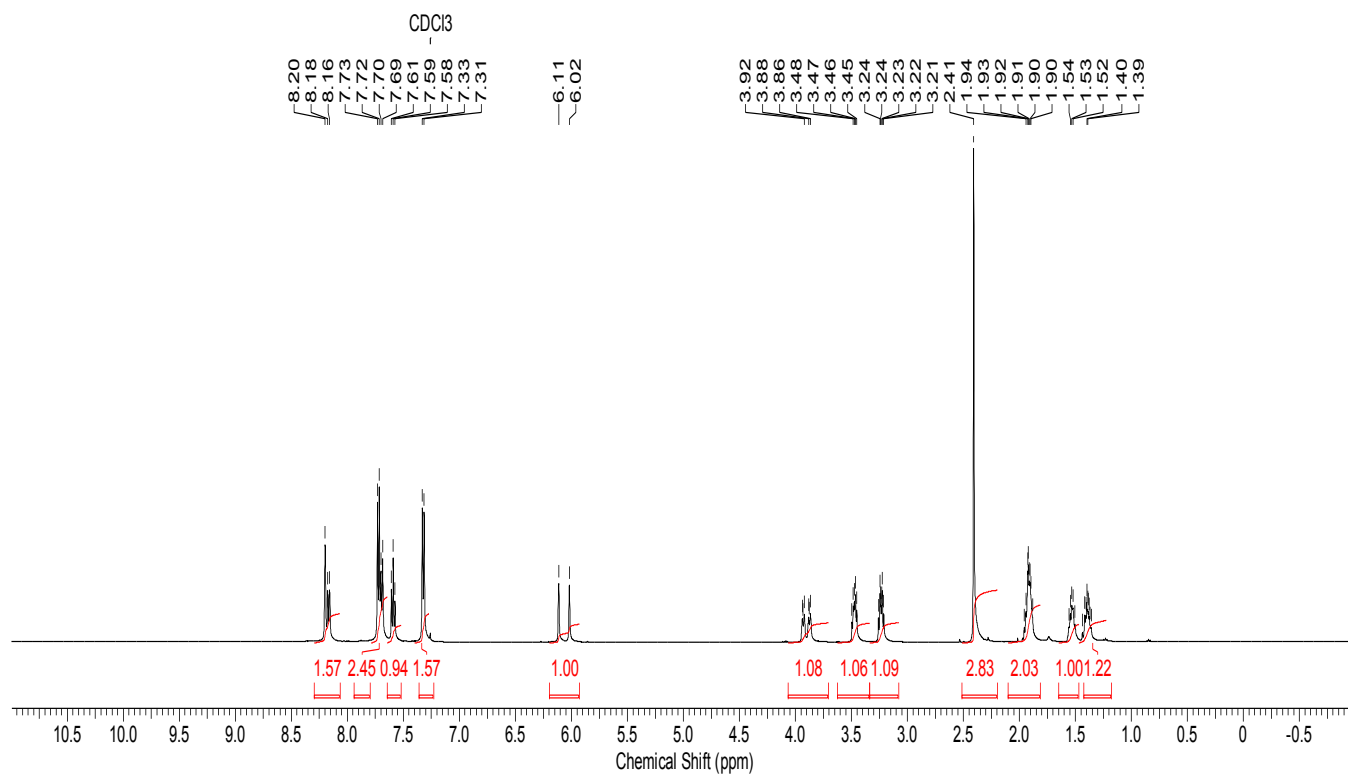

**<sup>13</sup>C NMR**  
**125.7 MHz**  
**CDCl<sub>3</sub>**

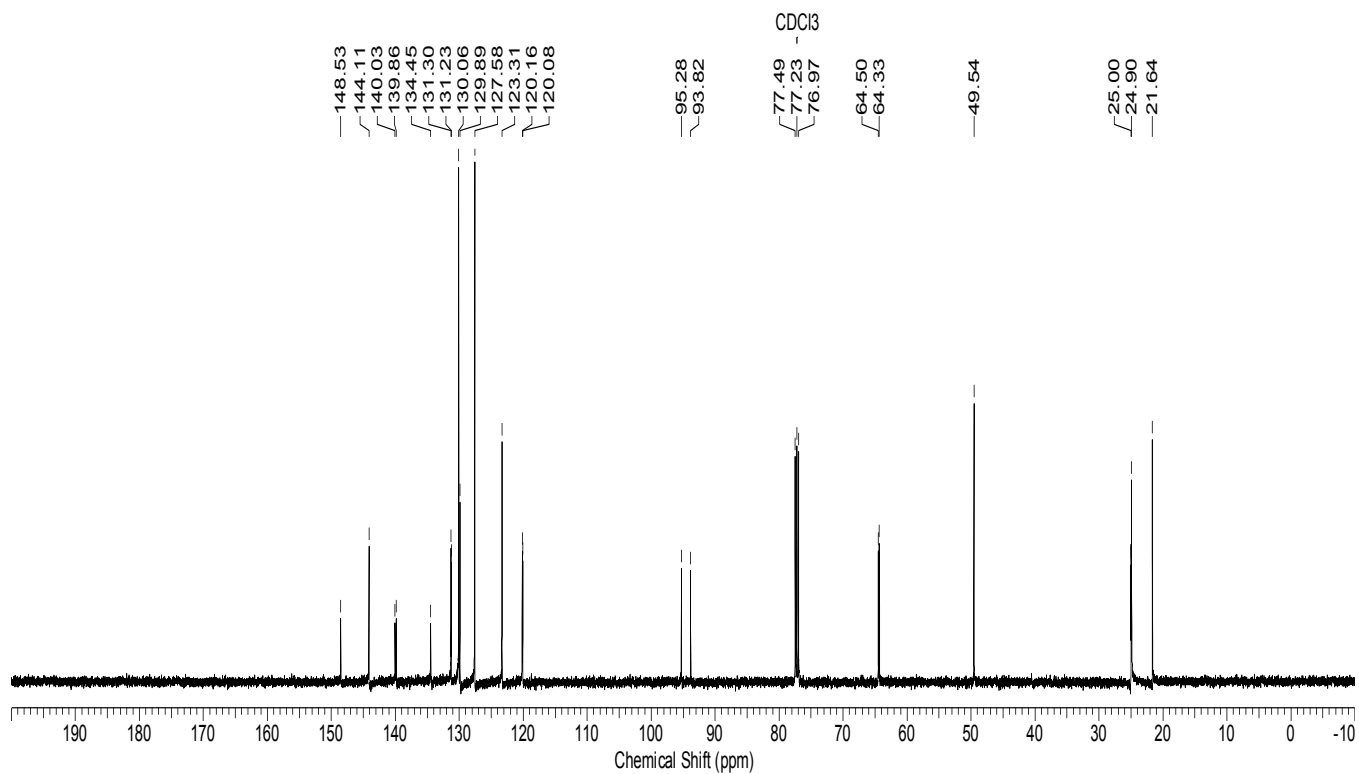

**$^{19}\text{F}$  NMR**  
**470.4 MHz**  
 **$\text{CDCl}_3$**

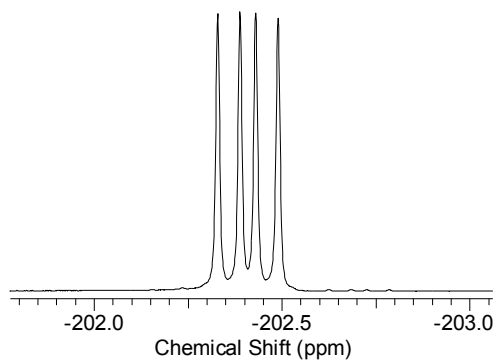

**<sup>1</sup>H NMR**  
**500 MHz**  
**CDCl<sub>3</sub>**

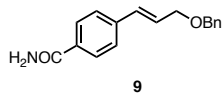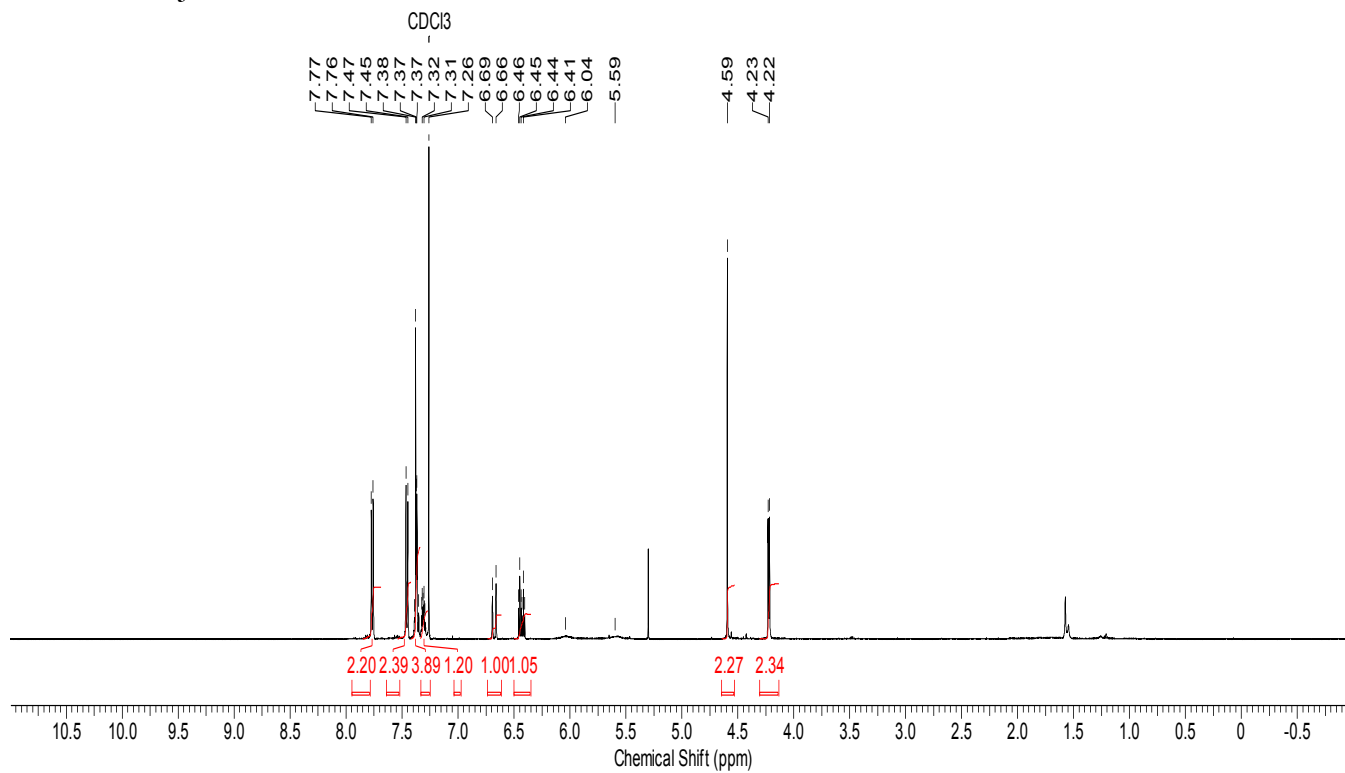

**<sup>13</sup>C NMR**  
**125.7 MHz**  
**10% CD<sub>3</sub>OD/CDCl<sub>3</sub>**

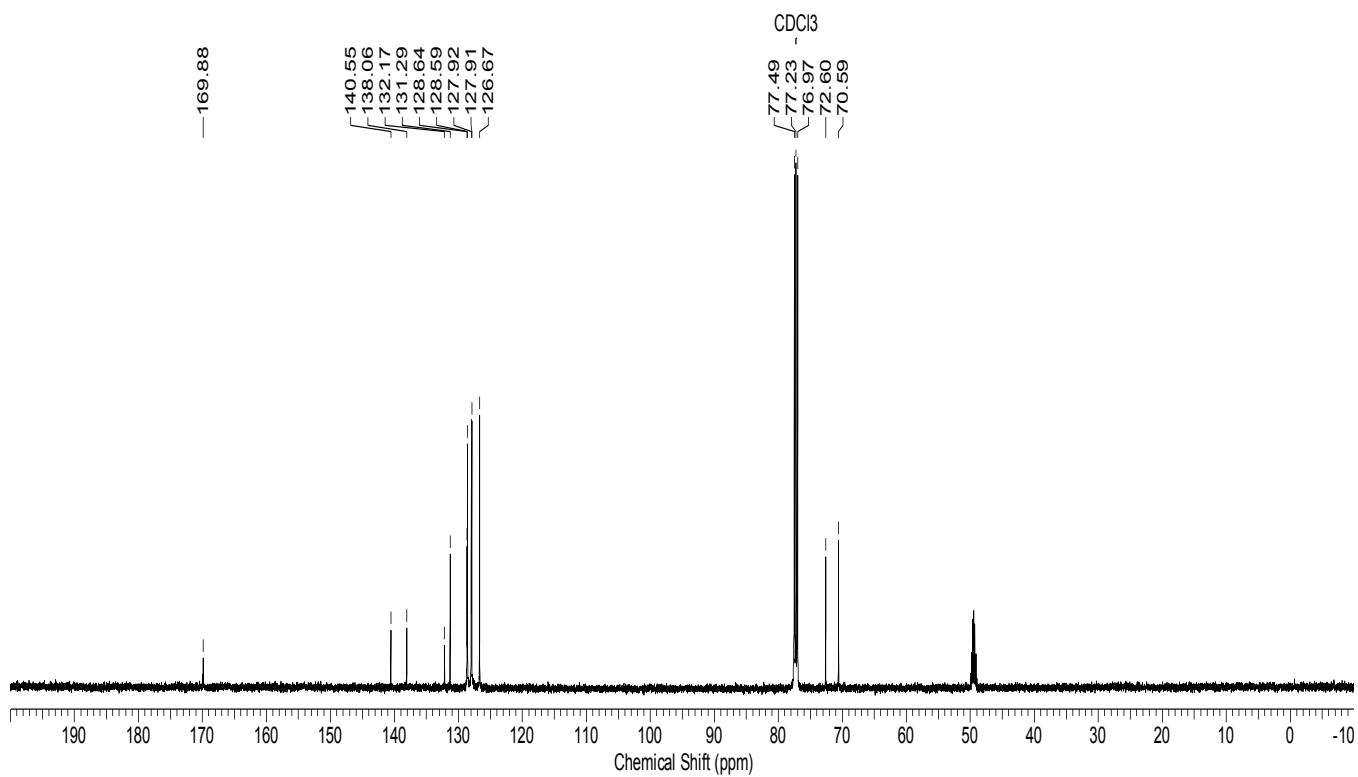

**<sup>1</sup>H NMR**  
**500 MHz**  
**CDCl<sub>3</sub>**

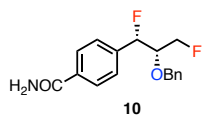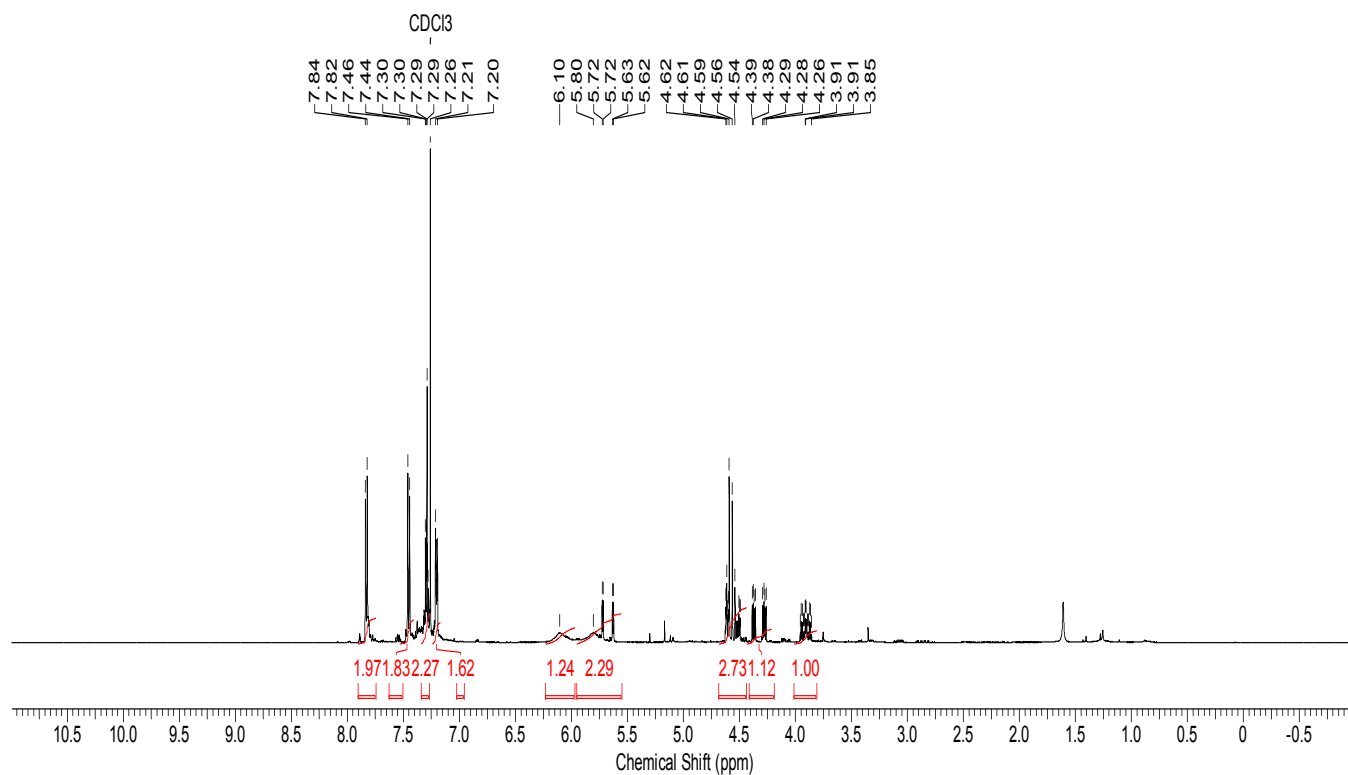

**<sup>13</sup>C NMR**  
**125.7 MHz**  
**CDCl<sub>3</sub>**

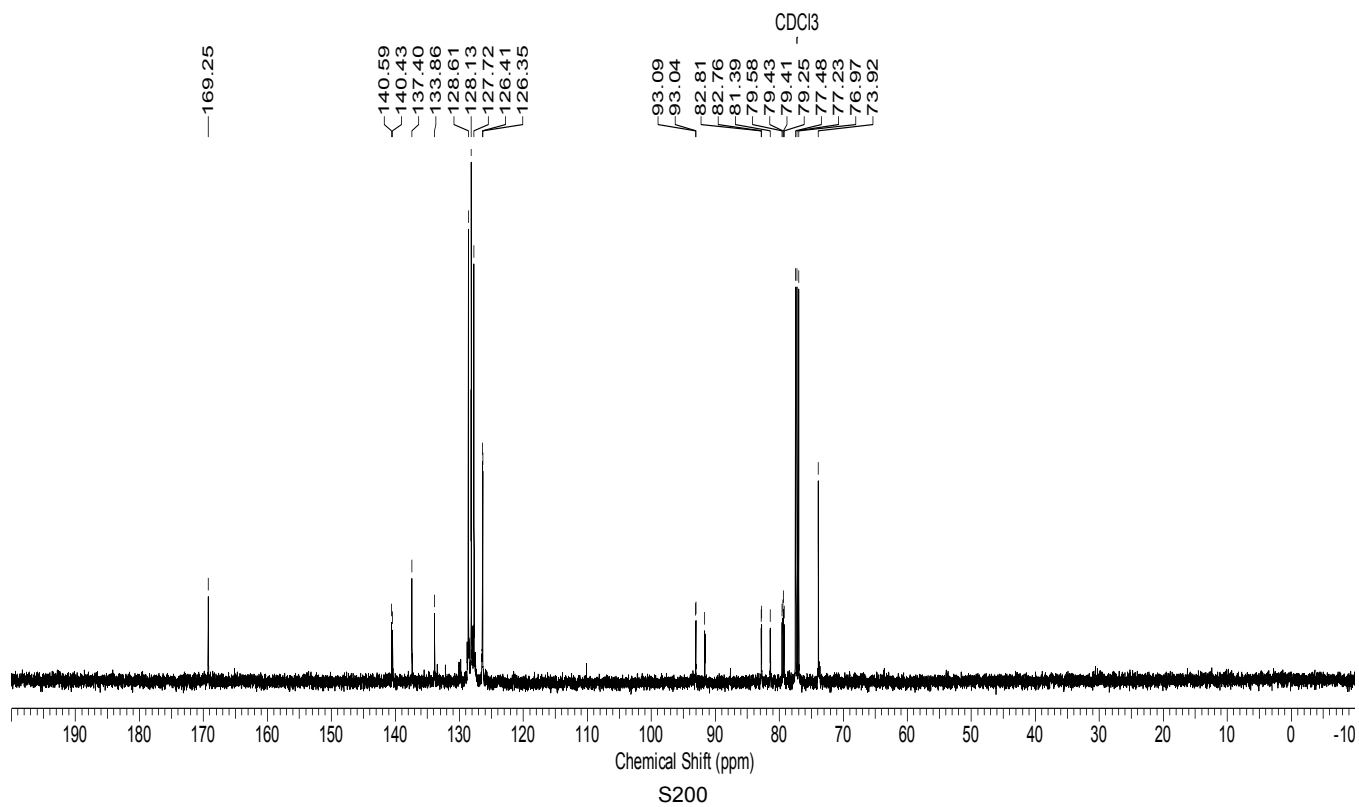



**$^{19}\text{F}$  NMR**  
**470.4 MHz**  
 **$\text{CDCl}_3$**

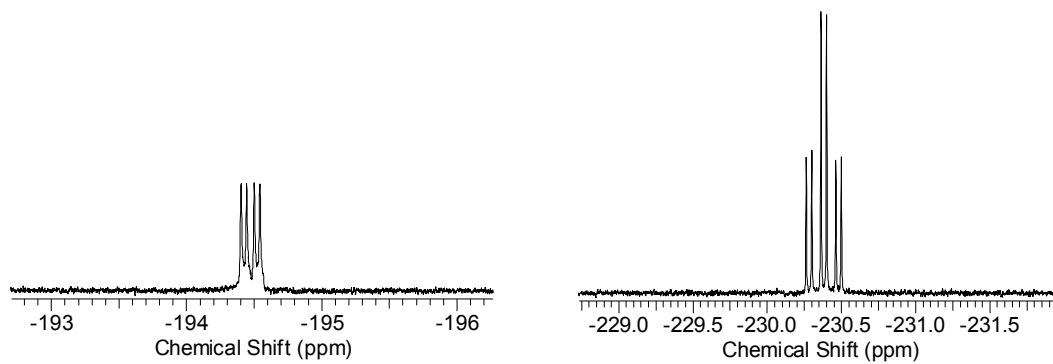

**<sup>1</sup>H NMR**  
**500 MHz**  
**CDCl<sub>3</sub>**

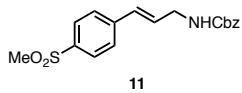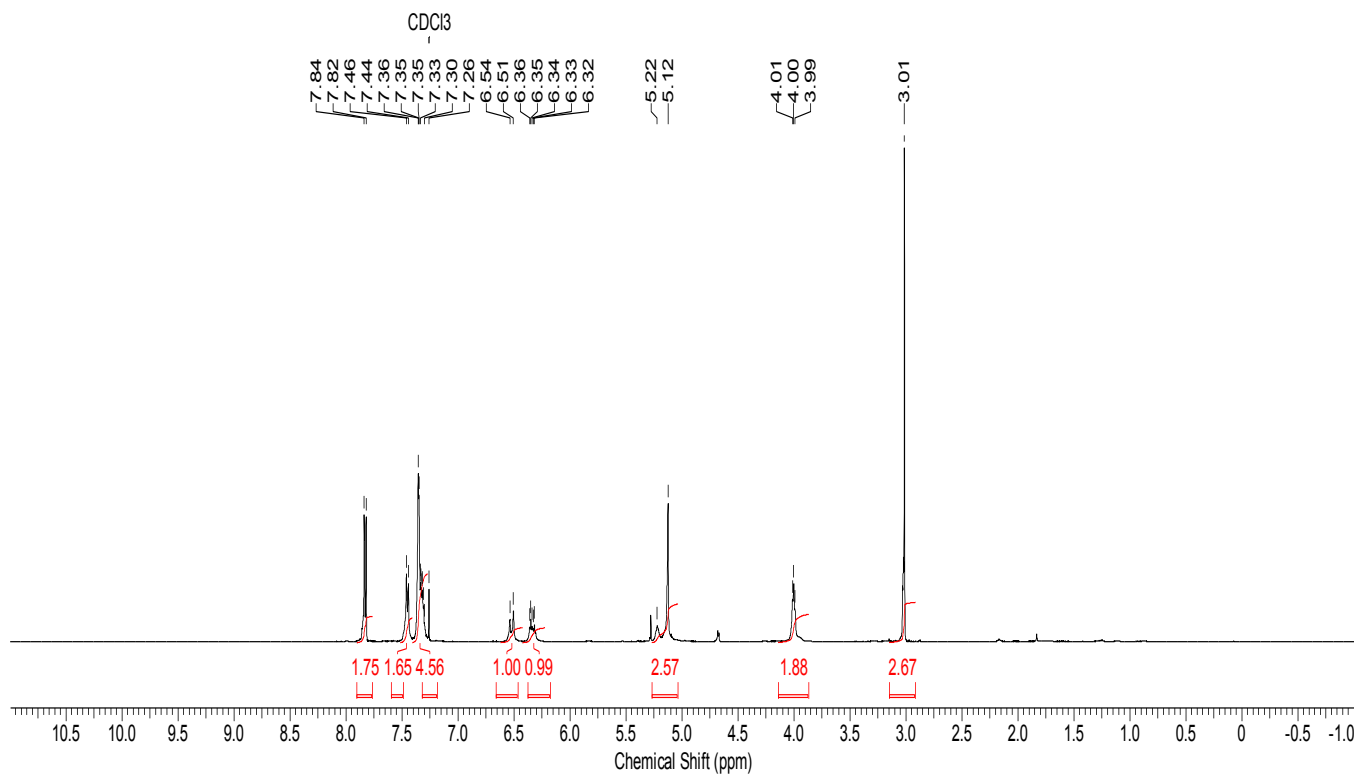

**<sup>13</sup>C NMR**  
**125.7 MHz**  
**CDCl<sub>3</sub>**

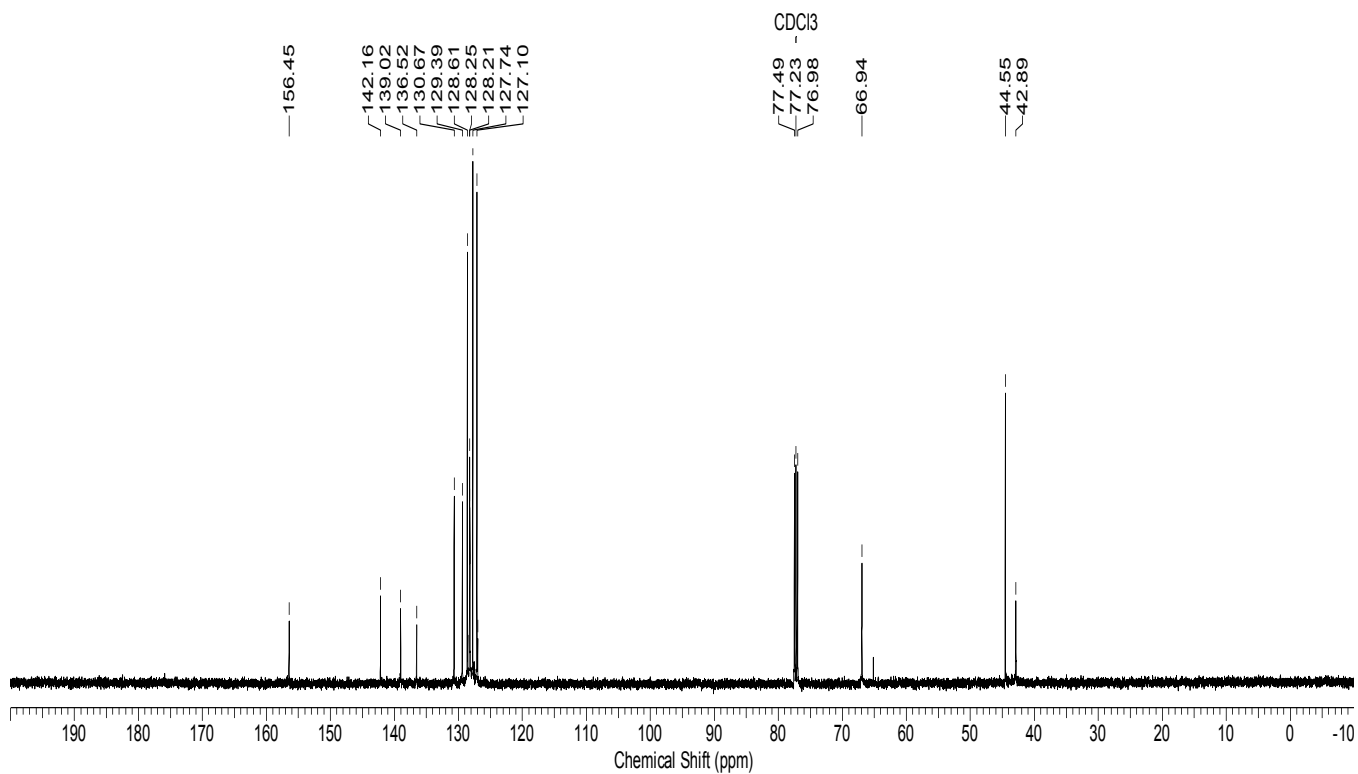

**<sup>1</sup>H NMR**  
**500 MHz**  
**CDCl<sub>3</sub>**

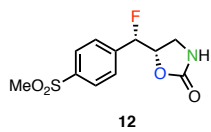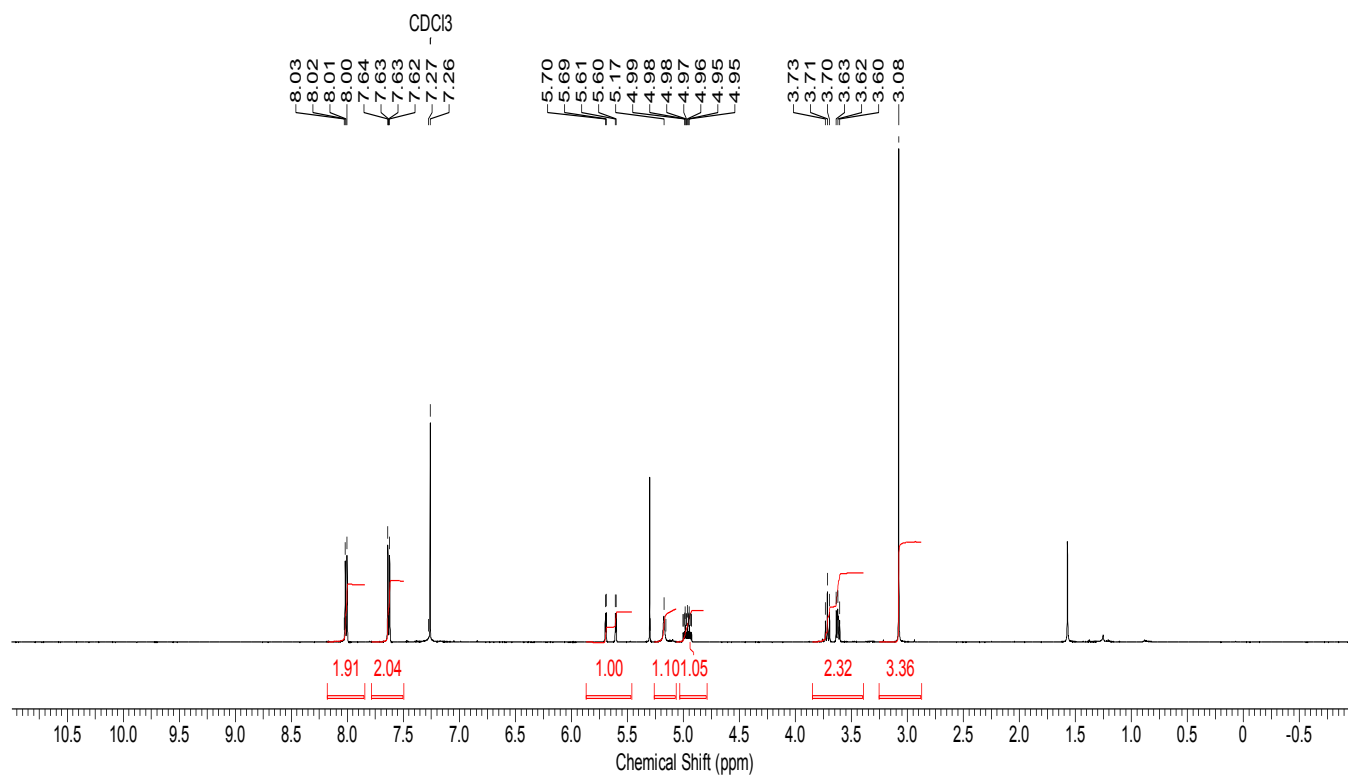

**<sup>13</sup>C NMR**  
**500 MHz**  
**10% CD<sub>3</sub>OD/CDCl<sub>3</sub>**

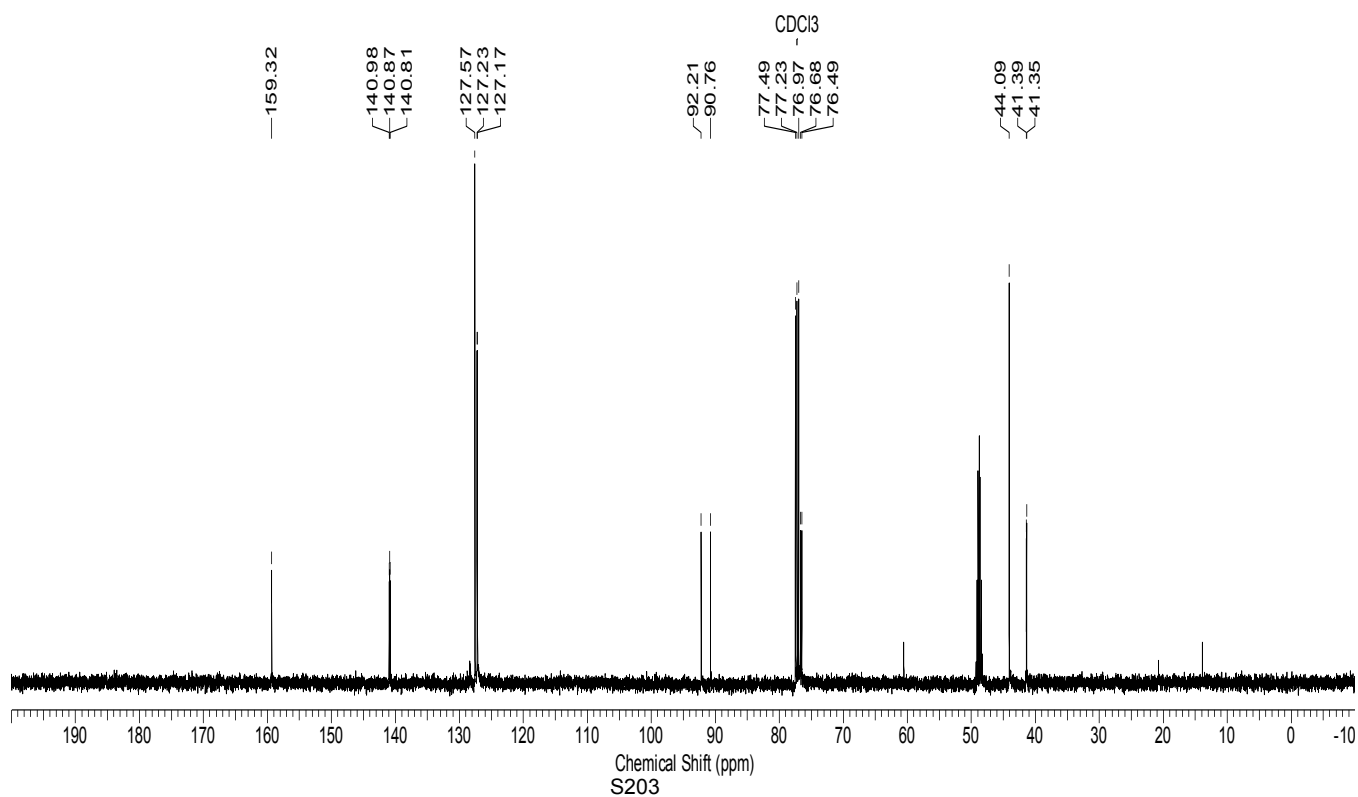

**<sup>19</sup>F NMR**  
**470.4 MHz**  
**CDCl<sub>3</sub>**

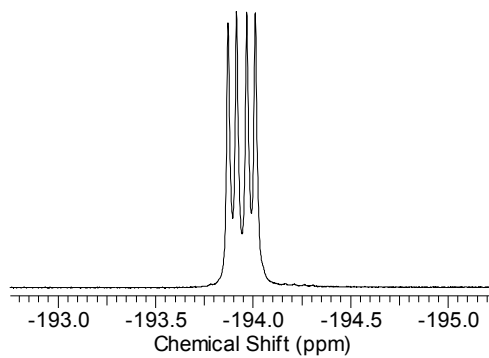

**<sup>1</sup>H NMR**  
**500 MHz**  
**CDCl<sub>3</sub>**

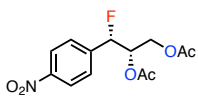

14

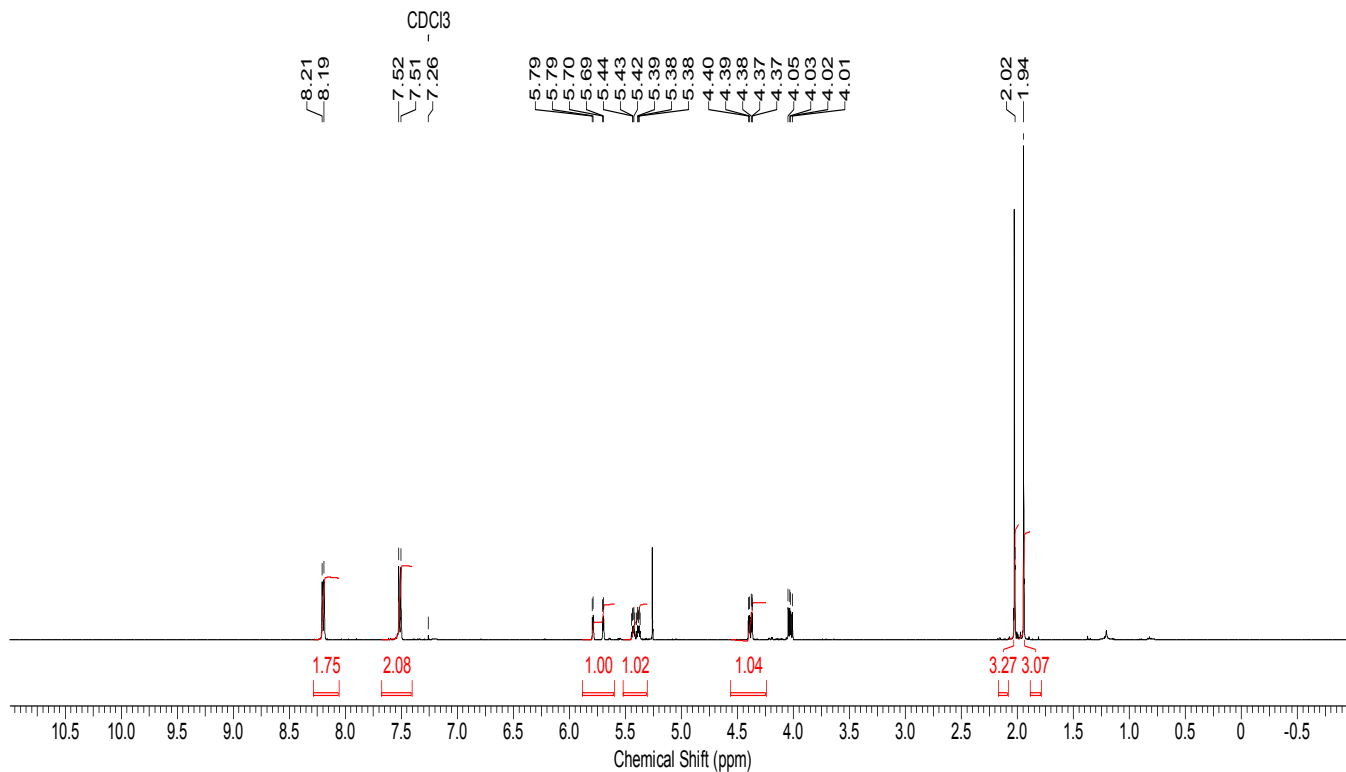

**<sup>13</sup>C NMR**  
**125.7 MHz**  
**CDCl<sub>3</sub>**

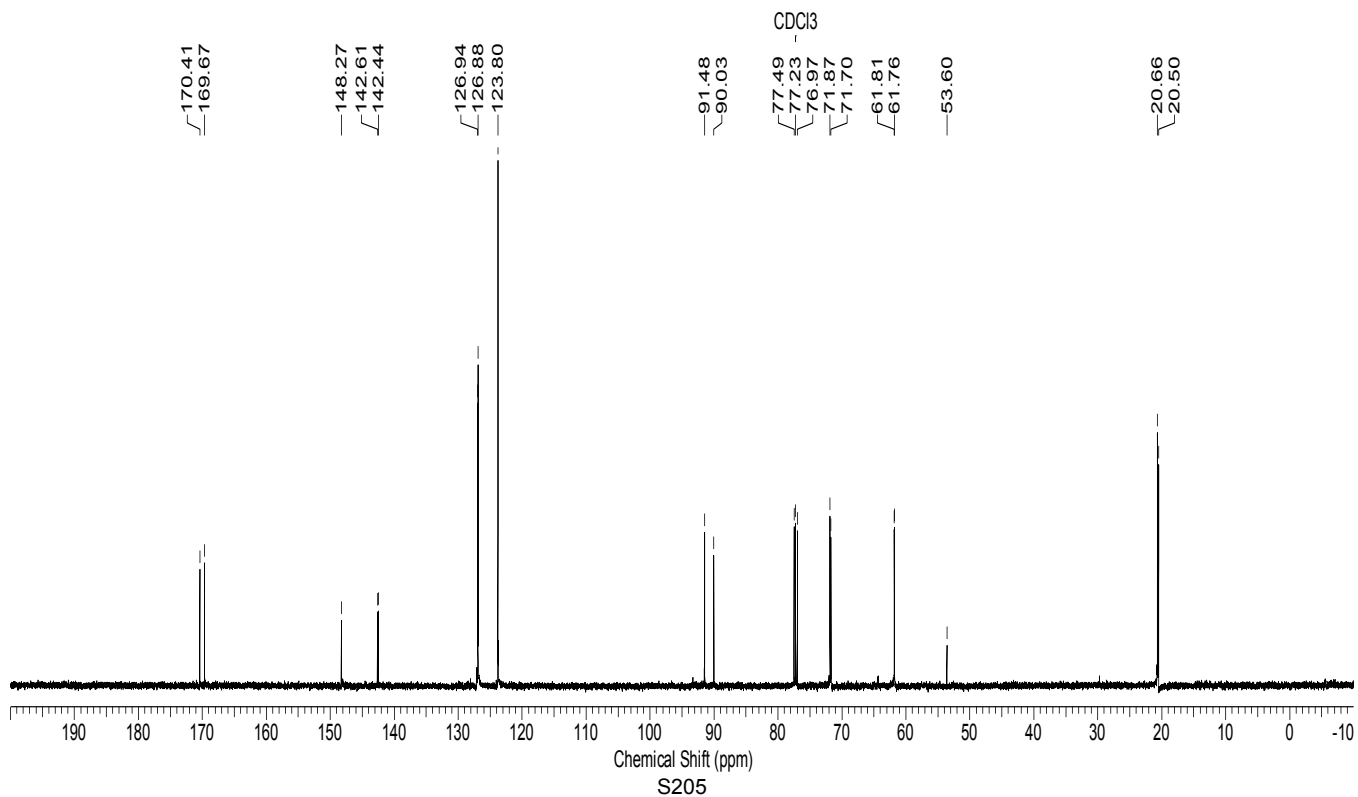

**<sup>19</sup>F NMR**  
**470.4 MHz**  
**CDCl<sub>3</sub>**

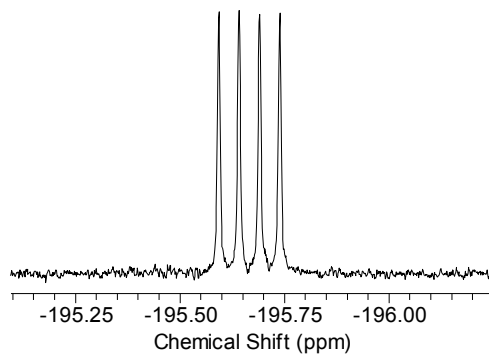

**<sup>1</sup>H NMR**  
**500 MHz**  
**CDCl<sub>3</sub>**

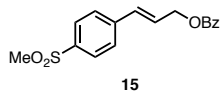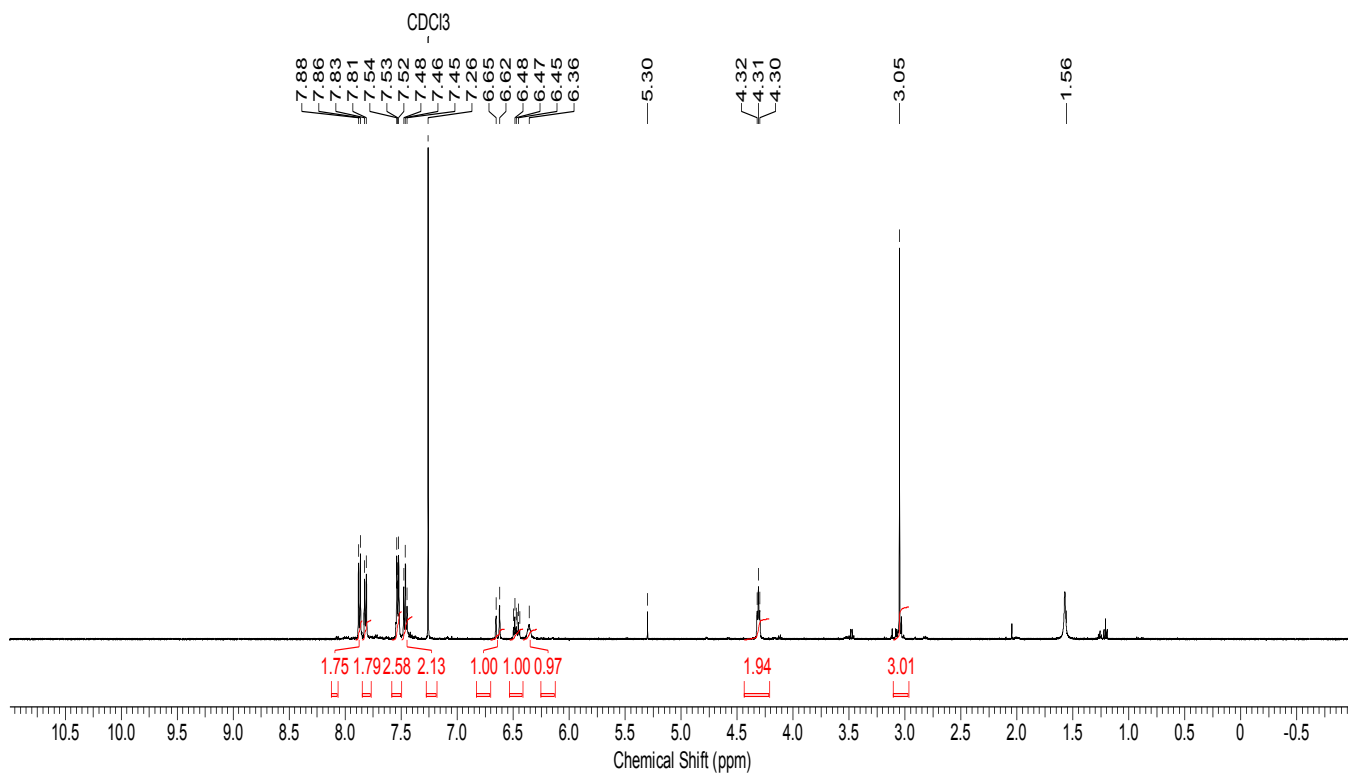

**<sup>13</sup>C NMR**  
**125.7 MHz**  
**CDCl<sub>3</sub>**

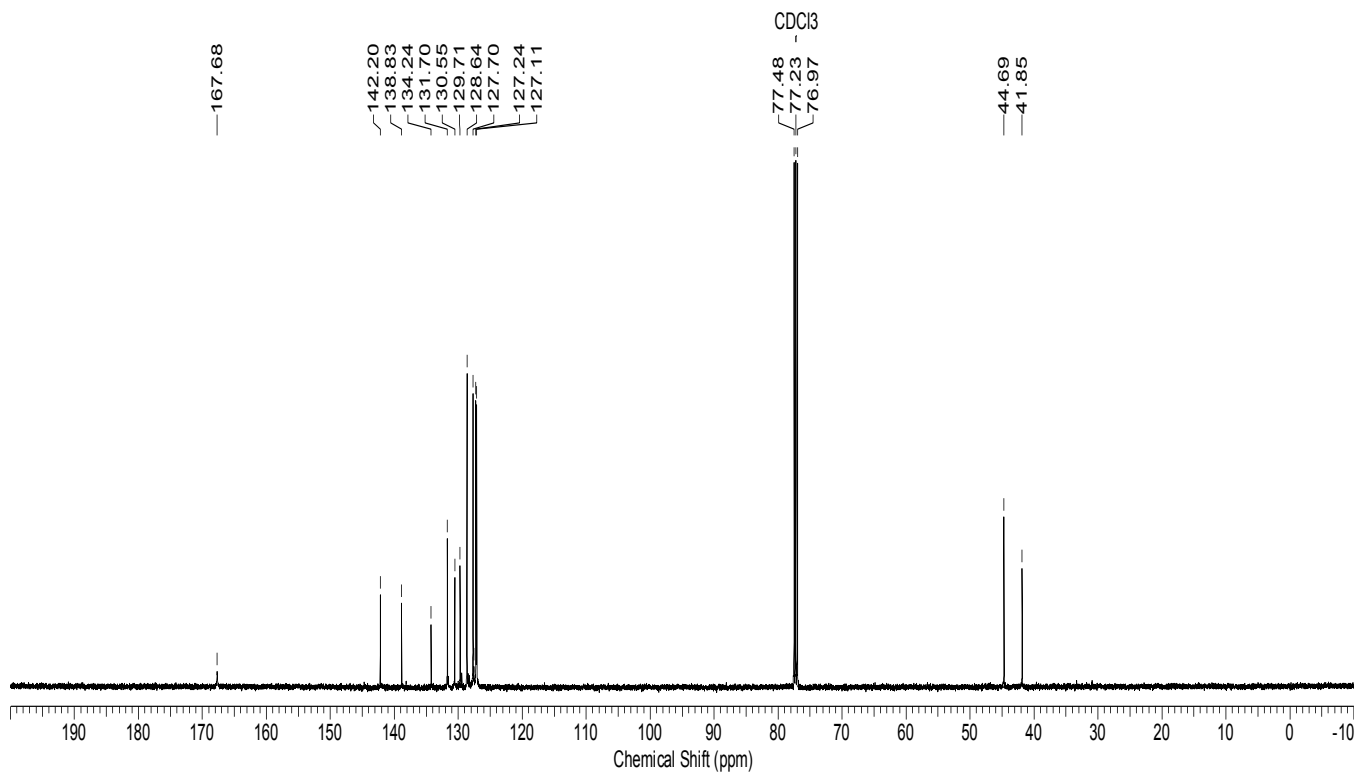

**<sup>1</sup>H NMR**  
**500 MHz**  
**CDCl<sub>3</sub>**

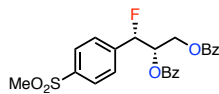

16

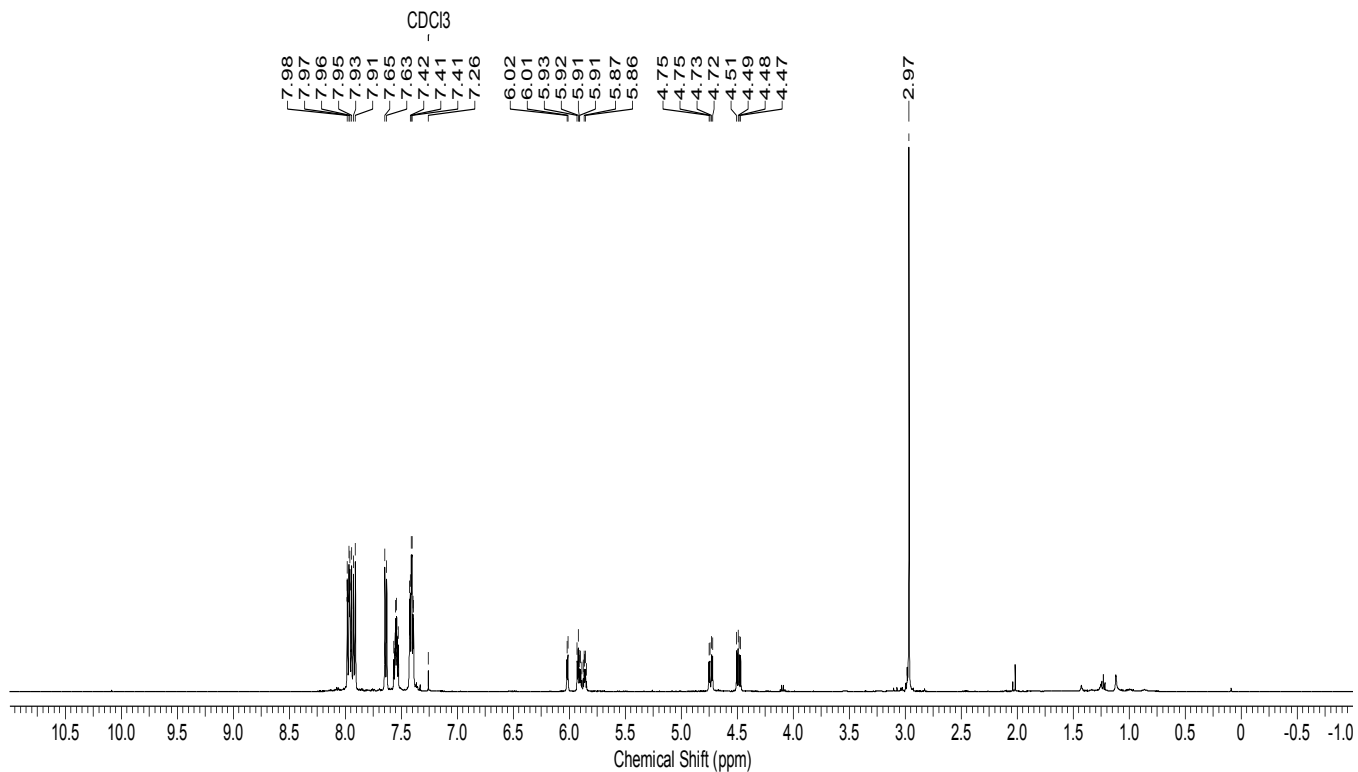

**<sup>13</sup>C NMR**  
**125.7 MHz**  
**CDCl<sub>3</sub>**

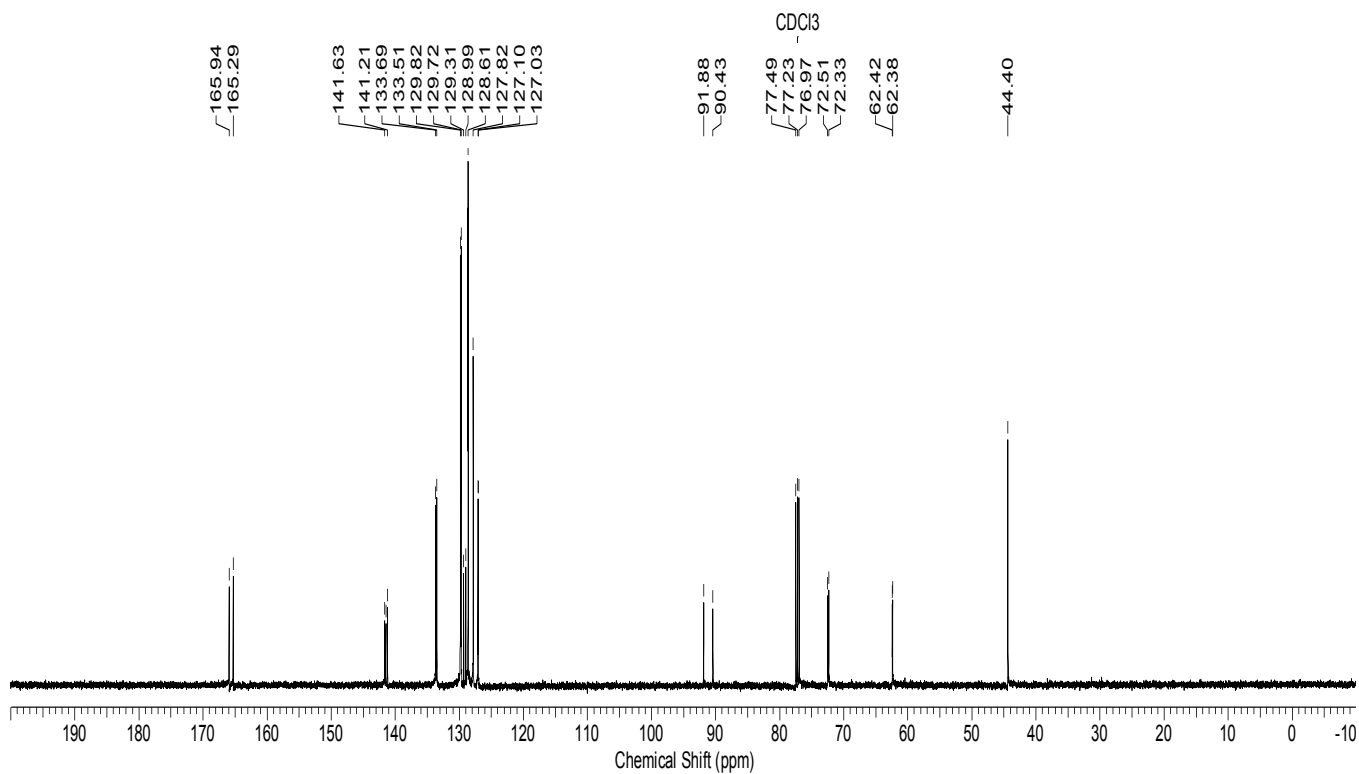



**$^{19}\text{F}$  NMR**  
**470.4 MHz**  
 **$\text{CDCl}_3$**

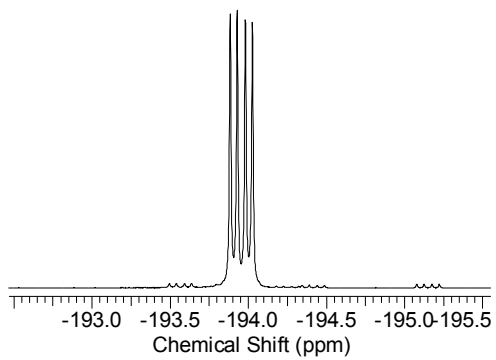

**<sup>1</sup>H NMR**  
**500 MHz**  
**CDCl<sub>3</sub>**

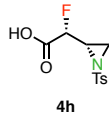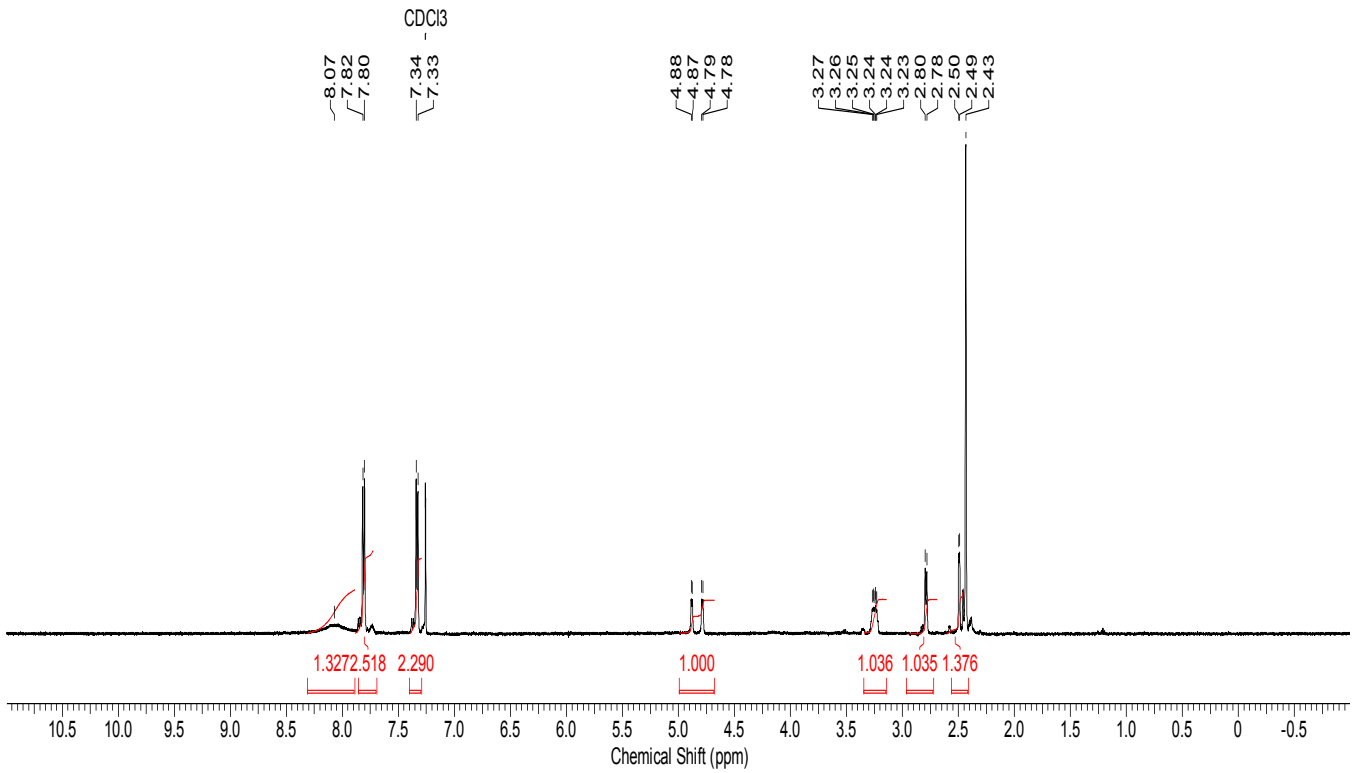

**<sup>13</sup>C NMR**  
**125.7 MHz**  
**CDCl<sub>3</sub>**

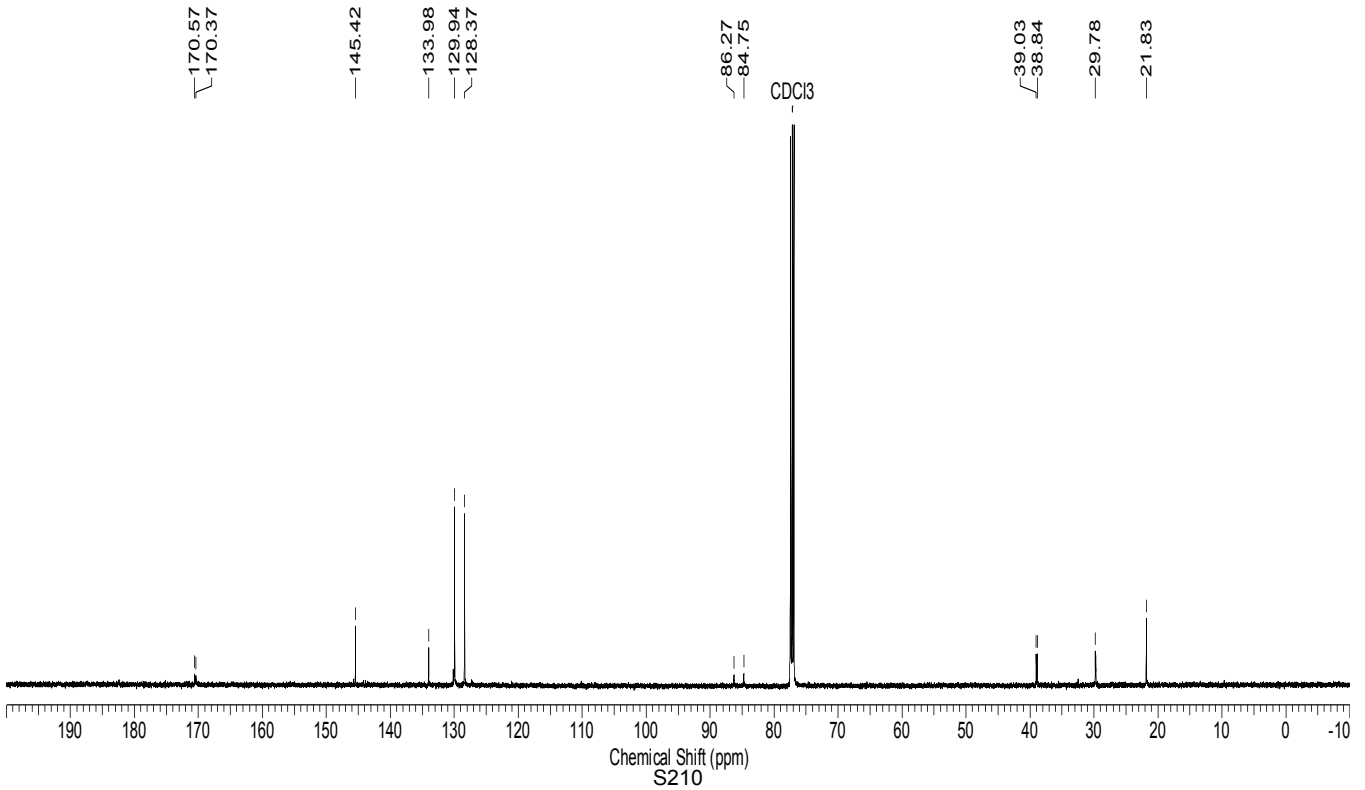

**$^{19}\text{F}$  NMR**  
**470.4 MHz**  
 **$\text{CDCl}_3$**

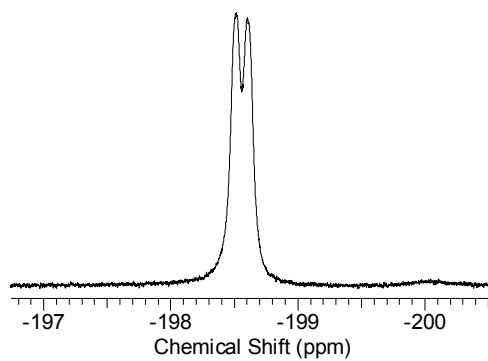

Supplement: NIHMS955661-supplement-Supporting_Information.pdf [file NIHMS955661-supplement-Supporting_Information.pdf]
